# Supplementary material for: Genetic capture for conscious state transitions
Source: Research Square preprint supplement (doi:10.21203/rs.3.rs-6192781/v1), 2025-06-19
Supplement: Supplementary file 1 [file 00cca3be7eb12555bb5d28ef.xlsx]

## Sheet: Sheet1
					Mean z-scored firing rates ± SE
Cluster ID				Count	Induction	Maintenance
1				8	-0.42 ± 0.02	-0.13 ± 0.01
2				8	-0.28 ± 0.01	-0.01 ± 0.03
3				8	-0.42 ± 0.02	-0.31 ± 0.03
4				1	-0.63	-0.1
5				2	-0.3 ± 0.01	-0.25 ± 0
6				2	-0.14 ± 0.01	-0.21 ± 0.02
