# Supplementary material for: Genetic capture for conscious state transitions
Source: Research Square preprint supplement (doi:10.21203/rs.3.rs-6192781/v1), 2025-06-19
Supplement: Supplementary file 2 [file 00d2d4d992a8c196b39cfdd2.xlsx]

## Sheet: Sheet1
				Mean z-scored firing rates
Region	Subregion	# Units	Cluster ID	Induction	Maintenance	Norm. Fos Density
Isocortex	MOp5	4	3	-0.41	-0.31	-0.715
Isocortex	MOp6a	10	3	-0.41	-0.29	-0.593
Isocortex	SSp-bfd6b	1	4	-0.63	-0.1	0.007
Isocortex	SSp-ll1	2	3	-0.45	-0.5	0.161
Isocortex	SSp-ll2/3	5	1	-0.49	-0.08	-0.63
Isocortex	SSp-ll4	7	5	-0.31	-0.25	-0.558
Isocortex	SSp-ll5	4	3	-0.38	-0.24	-0.61
Isocortex	SSp-ll6a	4	3	-0.39	-0.29	-0.485
Hippocampus	DG-mo	2	2	-0.3	-0.02	0.105
Hippocampus	DG-po	1	6	-0.13	-0.19	-0.021
Hippocampus	CA3	50	1	-0.4	-0.16	0.056
Amygdala	MEA	16	2	-0.2	-0.06	0.218
Thalamus	AMv	170	3	-0.38	-0.29	0.21
Thalamus	AV	198	3	-0.42	-0.27	-0.136
Thalamus	LGd-co	14	2	-0.27	-0.04	0
Thalamus	Eth	5	1	-0.45	-0.17	0
Thalamus	LD	55	1	-0.44	-0.14	0.071
Thalamus	PR	14	3	-0.51	-0.28	0.311
Thalamus	PO	1	1	-0.36	-0.13	-0.05
Thalamus	PoT	45	2	-0.29	0	0
Thalamus	RT	182	1	-0.4	-0.12	0.114
Thalamus	VAL	6	1	-0.37	-0.13	0.023
Thalamus	VM	44	1	-0.41	-0.1	0.112
Thalamus	VPL	42	2	-0.31	-0.02	-0.397
Thalamus	VPM	107	2	-0.26	0	-0.569
Hypothalamus	AHN	2	6	-0.15	-0.23	0.281
Hypothalamus	FF	2	2	-0.31	0.16	-0.053
Hypothalamus	STN	12	5	-0.29	-0.25	-0.257
Hypothalamus	ZI	43	2	-0.31	-0.1	-0.091
