# Supplementary material for: Genetic capture for conscious state transitions
Source: Research Square preprint supplement (doi:10.21203/rs.3.rs-6192781/v1), 2025-06-19
Supplement: Supplementary file 3 [file 0b451df8764b4d819ffa6a64.docx]

**Methods:**

*Mice.* All experiments were approved by the National Institutes of Health and the University of Washington Institutional Animal Care and Use Committee. 3- to 6-month-old male and female c57bl/6j or homozygous Fos2A-iCreER (FosTRAP2) transgenic mice are used in all studies. Animals are group-housed in a 12-hour reverse light/dark cycle facility with ad libitum access to food and water. Animals used in electrocorticography or Neuropixels studies are singly housed during the recording experiments.

*Intact brain tissue collection after isoflurane exposure:* Mice were singly housed in the home cage for 3 days prior to tissue collection for intact whole brain Fos immunolabeling. Habituation to the testing room was achieved by placing mice in a temperature controlled red-light room for at least 2-3 hours a day for 3 days prior to tissue collection. On the test day, mice in the control condition remained singly housed in their home cage inside the testing room where isoflurane was delivered. Mice in the isoflurane condition were individually induced with 2% isoflurane and once loss of toe pinch reflex was confirmed, each mouse was maintained under general anesthesia for 180 minutes with 1.2%-1.3% isoflurane in oxygen delivered via nose cone. The concentration of isoflurane delivered at each nose cone was confirmed to be within range using a gas analyzer prior to placing the mouse in the nose cone. Mice were actively warmed on a heating pad and continuously monitored by the experimenter. After 180 minutes, all mice were more deeply anesthetized with isoflurane and transcardially perfused with PBS followed by 10% formalin. Brains were dissected and post-fixed in formalin for 24 hours at 4°C prior to intact whole brain immunolabeling and clearing.

*Intact brain clearing and immunolabeling:* A previously published, modified version of the iDisco+ protocol was used to immunolabel and clear intact brain samples1,2. The following antibodies were used: Synaptic Systems Rat anti-cFos (1:2000) for Fos immunolabeling or Rockland Rabbit anti-RFP (1:2000) for mCherry DREADD immunolabeling followed by Donkey anti-Rat or Donkey anti-Rabbit Jackson ImmunoResearch AlexaFluor 647 Fab2-conjugated secondary antibody (1:500).

*Intact brain imaging:* Cleared, intact whole brains were imaged with a uniform axial resolution light sheet microscope (SmartSPIM, LifeCanvas Technologies) using either the 1.6x (5 µm voxels) or 3.6x (1.8 µm voxel) objectives for Fos samples, and 3.6x for TRAP samples. Samples were mounted horizontally using a custom sample holder immersed in dibenzyl ether (DBE). Images were acquired in two channels (488 nm: autofluorescence; 639 nm: mCherry/AlexaFluor-647) and stitched using the SmartSPIM acquisition software. TRAP+ images were down-sampled (0.5x) prior to image processing with isotropic 3.6 µm voxels. 3-dimensional images were visualized using Arivis Pro software (Zeiss).

*ClearMap brainwide TRAP+ analysis:* We processed 7 intact formalin-fixed brain samples from FosTRAP2 transgenic mice infected with AAV-PHP.eB-DIO-Gq-DREADD-mCherry virus (see *Retroorbital virus injection* and *Activity-dependent labeling* procedures) using a modified version of the ClearMap pipeline as previously published2,3. We trained a pixel classifier in Ilastik to segment and quantify single cells based on somatic signal classification. This was achieved by selecting 21 image tiles (200 × 200 × 220 μm) from three separate samples, cropped from dorsal (2), central (3), and ventral (2) positions of the brain. To improve segmentation accuracy, an additional three tiles were used to correct for artifacts in ventricular and boundary regions. The fully trained classifier was then applied to all samples, generating segmented cell counts per brain region and voxelized heatmaps. We computed TRAP+ cell counts within two different levels of hierarchy within the Unified Brain Atlas: 1) 11 major anatomical divisions (Extended Fig 3b) and 914 minor subregions within those high-level anatomical divisions that no longer split into further daughter regions. We provide the raw TRAP+ cell counts, cell density, and statistical results for all analysis (Extended Data Table 3).

*ClearMap brainwide Fos analysis:* We processed 16 intact brain samples (n=7 controls and n = 9 isoflurane) using a modified version of the ClearMap pipeline as previously published2. We computed Fos-positive activated cell counts within two different levels of hierarchy within the Unified Brain Atlas: 1) 11 major anatomical divisions (Extended Fig 4) and 914 minor subregions within those high-level anatomical divisions that no longer split into further daughter regions (Fig 2d). To ensure accuracy within the hierarchical relationships, we ensured there were no overlapping spatial footprints and no double counting of any regions, following each subregion branch until the end or “stop-level.” We transformed the raw Fos cell counts to z-scores and normalized the data to account for regional volume differences. We used the home cage control group (control) to normalize the z-scores for each region of interest using the formula z= (x-μ)/σ, where x represents the Fos count of the treatment group, μ represents the mean Fos count of the control group, and σ represents the SD of the control group. We then converted the z-score into -log10 for visualization. For the high-level analysis, we used an unpaired t-test, *p<0.05 (Extended Fig 4i). For the stop-level analysis, we used a t-test followed by the false discovery rate (FDR) multiple comparison correction with an alpha significance level of 0.01 (q < 0.01), two-tailed (Fig 2d). We provide the raw Fos counts, z-scored data and statistical results for all analysis (Extended Table 3).

*UNRAVEL Fos analysis*: We also analyzed whole brain Fos immunolabeling using UNRAVEL4 (UN-biased high-Resolution Analysis and Validation of Ensembles using Light sheet images), with refactored Python code (documentation: b-heifets.github.io/UNRAVEL/index.html). Autofluorescence images were resampled to 50 μm resolution, and tissue was masked using Ilastik (v1.4.0; pixel classification; all features) for N4 bias field correction (ANTsPy; 0.4.2). The resampled images were padded (15% voxels on all sides) and smoothed with a Gaussian filter (sigma = 0.4) before being registered with an average template from iDisco and light-sheet microscopy (LSFM), which was aligned with the Allen Mouse Brain Common Coordinate Framework (CCFv3)5. Registration was performed using ANTsPy: ants.affine_initializer(fixed_image=autofluorescence_image, moving_image=template, search_factor=1, radian_fraction=1, local_search_iterations=500), followed by ants.registration(fixed=autofluorescence_image, moving=template_aligned_with_tissue, grad_step=0.1, syn_metric='CC', syn_sampling=2, reg_iterations=(100, 70, 50, 20)). Registration accuracy was visually confirmed using FSLeyes (v0.30.1; FMRIB), with the atlas warped to each fixed registration input image. Fos immunofluorescence was enhanced through 3x3x3 spatial averaging and rolling ball background subtraction (pixel radius = 4). The resulting images were warped to 25 μm atlas space using transforms from registration. Each hemisphere was z-scored using a warped tissue mask and a hemispheric mask ((image − mean intensity in the brain)/standard deviation of intensity in the brain). The images were smoothed with a 100 μm kernel and mirrored to average the left and right sides. A unilateral atlas mask, excluding ventricles, fiber tracts, and undefined regions, spatially restricted the voxel-wise analyses.

Voxel-wise comparisons between the isoflurane and control groups (t-test

design) were performed using non-parametric permutation testing (18,000

permutations) with the general linear model (randomise_parallel; FMRIB; v6.0.2). P-

value maps were corrected for multiple comparisons using the false discovery rate

(FDR) method, applied across a series of q-values to identify clusters of significant

voxels. Data in Fig. 2 are from the most stringent q-value thresholds (q < 0.005, p <

0.000056 for Control < Isoflurane; q < 0.05, p < 0.0012 for Control > Isoflurane).

Clusters smaller than 100 voxels were excluded. Clusters were warped back to full-resolution tissue space for cell density measurements (Fos+ cells per cluster volume). Fos+ cells were segmented using Ilastik. 3D counting was performed using connected components-3d (v3.16.0; connectivity = 6). Clusters were considered valid if unpaired t-tests confirmed that differences in Fos labeling reflected changes in Fos+ cell densities. Information on valid clusters, including regional composition and Fos+ cell densities across FDR q-values, is provided in Extended Table 5. Statistical maps and other related data are available upon request. Scripts from [UNRAVEL](http://github.com/b-heifets/UNRAVEL) (github.com/b-heifets/UNRAVEL) are available at zenodo.org/records/13655988.

*Correlational, Permutation, and Network Analysis:* All associated network analyses and visualizations were conducted with the SMARTTR6 package, igraph, tidygraph package, and custom written functions. Pearson correlations between normalized Fos+ activity per region were calculated and asymptotic p-values for each correlation were determined using a one-sample t-test. Significantly correlated regions are visualized in heatmaps after FDR (Benjamini-Hochberg) correction using a significance threshold of q < 0.05. A permutation analysis was conducted to identify the functional connections which differed most between experimental groups. Correlations differences were calculated by subtracting correlations from the Control group from respective correlations in the Isoflurane group (rIsoflurane – rControl ). Each correlation difference was used as a test statistic against a null distribution produce by shuffling the labels of Control and Isoflurane mice 10,000 times, with the correlation difference recomputed for each shuffle. Each test statistic was compared to its individual null distributions to determine the p-value. Significance correlation differences for all analyses were thresholded using an alpha value of 0.001 and visualized as constructed network. Edge thickness in the permuted network represented magnitude of correlation difference, with regions represented as nodes. An agglomerative fast greedy modularity optimization algorithm2 was applied using tidygraph for community detection.

Individual functional networks for the Control and Isoflurane test conditions were constructed by representing regions as nodes and Pearson correlation values as edges, with correlation magnitude corresponding to edge thickness. Since pairwise correlations were calculated for all pairs, the initial functional network is complete, with all nodes fully interconnected. Thresholding is normally applied to assess the topological features of the most salient connections, although there is little consensus on the best approach, (i.e., thresholding by connection strength or connection proportion) or choice of threshold3. Thus, we constructed networks for Control and Isoflurane across a range of alpha thresholds (FDR uncorrected) from 0.0001 to 1, and across a range of edge proportion thresholds, from 0.001 to 0.50.

In both the permuted and individual functional networks, several topology metrics per node, such as degree, clustering coefficient, efficiency, and betweenness centrality4 are automatically calculated using the create_networks() or create_permutation_network() functions in SMARTTR. Summary statistics are calculated using the summarise_networks() function, which averages nodal metrics to calculate mean degree, mean efficiency, mean clustering coefficient, and mean betweenness for a given network. To assess for “small-world” properties5 of empirical Control and Isoflurane networks (edge proportion of 3.15%), we compared the clustering coefficient (*C*) and characteristic path length (*L*) with the corresponding values (*Crand, Lrand*) averaged from 100 random null networks. Null networks are generated by applying the degree sequence-preserving maslov-sneppen6 rewiring algorithm with the rewire_network() function, and averages metrics were calculated with summarize_null_networks(). Number of edge rewirings per random network are equivalent to number of edges x 100. The small-world index (s), a ratio summarizing the propensity for high clustering while maintaining efficiency in a network, is defined here as . Values above 1 are considered indicative of small-world properties. All analysis code is available on ([https://mjin1812.github.io/SMARTTR](https://mjin1812.github.io/SMARTR))

*Head-fixed implantation and habituation:* For high density silicon probe (Neuropixels) recordings, mice were implanted with a custom-made titanium headplate (H.E. Parmer Company, TN) for head-fixation of the animal, and 3D-printed “well”7 providing safe access for probe insertion and retention of saline solution on the skull surface during recordings. Following recovery (~2 weeks), mice were habituated to head-fixation for at least 3 days, starting with 15- to 20-min periods and increasing daily by 20 min until they exhibited minimal distress with fixation for 1 h8. For head-fixed recordings, mice were placed in a 3D-printed mouse holder9 adapted for isoflurane delivery via a 3D-printed stereotax anesthetic nose cone. During recordings, estimated isoflurane gas concentration was measured with a gas analyzer (BC Biomedical, MO).

*High-density in vivo Neuropixels recordings:* Male and female mice were prepared for head-fixed recordings in a behavioral rig adapted for isoflurane delivery and gas analyzer sampling at the nose cone. At least 1 day prior to each recording, craniotomies were made targeting regions of interest, planned beforehand using a specialized tool10 to take into consideration optimal probe orientations and angles of entry (5-15°), and finally sealed with Kwik-Cast (World Precision Instruments, FL). When not sealed, craniotomies were kept moist with continuous applications of saline into the “well.” On recording days, mice were first head-fixed and allowed to acclimate before probe insertion. Neuropixels 1.0 probes were mounted on a micromanipulator system (Sensapex, SC) and lowered via the planned trajectory to 100 µm beyond the target depth, then retracted after a 10-min delay and allowed to rest for an additional 10 min before starting the baseline recording. After a 5-min awake baseline, mice were induced with isoflurane to an initial target 1.5% concentration. Intermittent foot pinches were used to determine loss-of-reflex (LOR) time. Following LOR, mice were maintained at 1.3% isoflurane to begin the steady-state maintenance phase recording (Fig 4). After 10 min, the vaporizer was turned off for washout period of recording (Extended Fig 8). Mice were actively warmed via external heating pads. Each animal (n=4) had two recording sessions at least 24 hours apart, and one recording was left out due to poor signal quality for a total of 7 recording sessions. Altogether, we obtained units totaling N=1048; Isocortex, n=37; Hippocampus, n=53; Amygdala, n=16; Thalamus, n=883, Hypothalamus, n=59; see Extended Data Table 10. All recordings were acquired using SpikeGLX (Janelia Research Campus, VA).

*Histological alignment of recording tracts:* To determine the placement of isolated units in the brain, sorted units were aligned to the probe tracts after intact brain imaging. After recordings, intact formalin-fixed brains were cleared and imaged with light sheet fluorescent microscopy for probe tract tracing in the Allen Brain Atlas space and mapped onto the locations of isolated units to identify their placement in the brain (Fig 4b and see *Intact brain clearing* and *imaging*). After registering each brain to the Allen CCF11, probe tracts made by application of the lipophilic CM-DiI dye (Thermo Fisher, WA) to the probe shank before each recording were traced in Lasagna12 to yield a fitted line of XYZ coordinates, which were visualized in Brainrender11. A separate open-source tool13 was used to adjust the alignment of activity recorded along the shank to the regions identified along the tract.

*Neuropixels data processing:* Spike sorting was performed with Kilosort414, isolated units were discarded if they had fewer than 1000 spikes across the whole recording and filtered out further based on quality metrics assessment15. To prevent false negatives due to widely-observed prolonged inhibitions from anesthetic induction, units were primarily filtered out if they concurrently exhibited low presence and low firing rate (<0.5 Hz), or a poor score on *L-ratio* or *D-prime* isolation metrics16,17. Remaining units were inspected manually using Phy14. Postprocessing and curation was performed using custom scripts integrating open-source Python packages18.

*Neuropixels data analysis:* Spike times were binned into 250-ms bins and averaged to yield each unit’s mean firing rates. For representative isoflurane activity traces, normalized firing rates were calculated by first subtracting the mean firing during the last 2 min of the baseline phase, then z-scored across the whole recording. For mean region and subregion activity heatmaps, firing rates were z-scored across the recording. Mean rates during “induction,” “maintenance” or “washout" phases were taken across all units in each major region or subregion (Extended Fig 8). Cortical and subcortical subregion normalized firing rates were averaged and compared via one-way ANOVA. For k-means clustering, subregion normalized firing rates were used as features for the elbow method analysis, yielding an optimal grouping of 6 clusters with asymptotic inertia and silhouette scores. All analyses were conducted using custom Python scripts integrating open-source packages.

*Retroorbital virus injection:* FosTRAP2 mice were briefly anesthetized with isoflurane (5-10-min) and administered adeno-associated virus (AAV) by retroorbital injection to one eye. AAV-PHP.eB-hSyn-DIO-hM3D(Gq)-mCherry (44361-PHPeB, Addgene) was used for activating DREADD and AAV-PHP.eB-hSyn-DIO-hM4D(Gi)-mCherry (44362-PHPeB, Addgene) was used for inhibitory DREADD. Virus was diluted in total 100µL sterile saline to ~ 2-3x1011 GC/mL based on prior studies19.

*Activity-dependent labeling (TRAP):* 3-4 weeks following retroorbital virus injection, FosTRAP2 mice were induced with 2% isoflurane and then maintained unresponsive at 1.2-1.3% for a total time of 180 min. Mice were actively warmed on a heating pad and continuously monitored by an experimenter. A single 50 mg/kg intraperitoneal (i.p.) injection of 4-hydroxytamoxifen (4-OHT, Sigma Aldrich), was administered at the 90-min halfway point during the isoflurane exposure to induce *Cre*-recombination and activity-dependent labeling20. Non-TRAP control mice also received retroorbital virus injections and isoflurane exposure but then sesame oil vehicle (Sigma Aldrich) in the equivalent volume of 4-OHT (~0.2mL) was given i.p. at the 90-min halfway point.

*Clozapine-n-oxide administration*: Clozapine-n-oxide (CNO, Enzo Life Sciences) was solubilized in water and stored as 5mg/mL aliquots. For testing, the aliquot was diluted in sterile saline to an end concentration of 0.5 mg/mL for 5 mg/kg behavioral studies. Mice received i.p. injections according to their body weight ranging from 0.2-0.3 mL for a 20-30g mouse. The equivalent volume i.p. sterile saline was delivered for saline trials.

*Electrocorticography surgical procedure & neural signal data recording:* Electrocorticography (ECoG) was recorded using a tethered implant as previously described27. Briefly, using aseptic stereotaxic surgical techniques under isoflurane anesthesia, a midline incision was made above the skull, and ECoG-recording electrodes (Pinnacle Technology, Lawrence, KS; No. 8209: 0.10-in.) were screwed through cranial holes at the following coordinates:

- *Channel 1 (left frontal cortex)*: 1.5 mm lateral and 2 mm anterior to bregma
- *Channel 2 (right parietal cortex)*: 1.5 mm lateral and 2 mm posterior to bregma
- *Ground (visual cortex)*: 1.5 mm lateral and 4 mm posterior to bregma
- *Reference (cerebellum)*: 1.5 mm lateral and 6 mm posterior to bregma

Mice were singly housed in standard cages under a 12:12 light-dark (LD) cycle following surgery. After a 14-day recovery period, they were moved to recording cages, fitted with a tether and preamplifier (100x signal gain) connected to the Pinnacle Technology recording system, and given at least 1 day to acclimate before recording.

Animals were injected with saline or CNO (5mg/kg) at the same time of day on consecutive days (days 1 and 2, respectively), with pre-experimental (day 0) and post-experimental (day 3) days serving as baseline comparisons. To assess neural dynamics during isoflurane, mice were placed in a specialized chamber and induced with 3% isoflurane until fully immobile (~10 minutes). Isoflurane was then discontinued, and the mice were allowed to fully wake (~20–30 minutes). In all recording days, electromyography (EMG) signals were obtained by inserting a pair of silver wires into the neck muscles. All screws and wires were connected to a common 6-pin connector compatible with the Pinnacle recording device using silver wire. Signals were continuously recorded at 400 Hz with low-pass filters at 100 Hz. All recordings were saved and exported for processing using the European Data Format (EDF). Simultaneously, animal activity was continuously recorded using webcams.

For each animal, one hour of data (time-matched across days) was extracted for each condition (pre, saline, CNO, post), along with the entirety of the isoflurane induction condition, and saved to individual .edf files. Spectrograms were generated by low-pass filtering each file at 12 Hz and log-transforming the signal data. Additionally, slow wave signal-to-noise ratio (SNR) was calculated using minute-long bins by dividing mean power in the delta frequency band (1–4 Hz, primarily capturing delta waves associated with sleep and anesthesia28) by mean power in surrounding frequencies (0.5–1 Hz + 4–7 Hz). All analyses were conducted using the left frontal cortex electrode (i.e., channel 1).

To quantify the change in delta (1-4 Hz) over the course of drug onset (i.e., 1 minute prior to and 15 minutes following drug onset), we ran a linear mixed model predicting delta activity ratio using the interaction term *time × condition* (using the ‘Pre’ condition as reference and controlling for the random effect of individual animal). The results show that the only significant differences in delta activity were the increases seen over time in the CNO and ISO conditions, with no other significant direct or interaction effects (see Extended Data Table 1).

*Open field test:* CNO dose-dependent changes in maximum velocity were assessed in a 30 x 30 cm open field chamber (Extended Fig 1c-d). Mice were habituated to the chamber for at least 3 days. On alternating days, they received intraperitoneal injection of either 1 mg/kg CNO, 5mg/kg CNO, or the equivalent volume of saline, and were placed in the box for 20-min with concurrent webcam video recording. A total of 3-4 trials per drug condition from 6 Gq-DREADD-expressing mice and 5 Gi-DREADD expressing mice were analyzed for changes in movement velocity using Any-MAZE video tracking software. GraphPad Prism was used to analyze data with 2-way ANOVA and Tukey multiple comparison post-tests. See Extended Data Table 1 for statistics.

*Loss of righting reflex*: Latency to loss of righting reflex was assessed in a chamber equipped for isoflurane delivery and sampling of isoflurane concentration with a gas analyzer (Extended Fig 1a). Mice were individually injected with 10 mg/kg CNO or saline in alternating trials at least one day apart and placed in the chamber. Isoflurane was administered stepwise from 0.5 to 2% on the vaporizer in 0.5 increments and loss of righting reflex was assessed at each stepwise increment with the exact sampled concentration recorded.

*Warm water tail withdrawal test:*Mice were tested for the latency to remove their tail from a warm water bath (52.5°C). Mice are restrained within a paper towel, and 1/3 to ½ of the tail is immersed, and the time to remove the tail (tail flick latency) is recorded22–25. This is done at baseline after saline, and then in 30-min intervals after CNO injection. See Extended Data Table 1 for statistics.

*Hot plate test:*Mice are placed on a 53°C plate for 30 seconds, and behaviors are video recorded26. This occurs at baseline and after CNO at 2-time intervals (30-min and 90-min post-CNO) interleaved between tail withdrawal tests. Latency to jump, groom paws, and number of occurrences for these behaviors are quantified from videos by two independent researchers. See Extended Data Table 1 for statistics.

*Rotarod test:* Coordination post CNO injection was tested for each mouse on a rotarod after modified open field testing (Fig 1b and Extended Fig 1b). Mice were habituated for two days, 10-min per day, at 4 rotations per minute (rpm) before testing. On test day, mice received a saline i.p. injection in the morning and were placed on the rotarod at 4 rpm. Latency to fall was recorded, unless animals stayed on for the duration of the experiment (10 min). Mice were recorded again in the afternoon with a 5mg/kg i.p. CNO injection. See Extended Data Table 1.

*Wireless mechano-acoustic device implant:* Mice were implanted with wireless mechano-acoustic devices (MA device: nVital, NeuroLux, Inc.) subcutaneously on the ventral surface while under isoflurane anesthesia for a duration of less than 30 min. They were then group housed following surgery. See Ouyang et al.21 for surgical procedure and device details.

*Modified open field test and MA device data collection:* For 3 days before the experiment, mice were habituated to saline intraperitoneal (i.p.) injections and explored a 15cm x 15cm smaller, modified open field box for 10 min. The sides of the box were wrapped in 14G copper wire attached to tuner and power distribution control (PDC) boxes (NeuroLux, Inc). Implanted wireless mechano-acoustic (MA) devices were also tested during this time along with power input from the PDC box (7 watts). During each experiment day, the animal explored the enclosure for 2-min before an i.p. injection of either saline or 5mg/kg clozapine-n oxide (CNO, Enzo Life Sciences). Recordings were taken with a web-camera positioned directly above the animal for 20-min. During each CNO trial, the first observable loss of mobility was documented as “drug onset.” The average latency to immobility in all CNO trials was used to time-align “drug onset” in saline trials. Each mouse underwent 3 saline trials and 2-3 CNO trials over 6 days with no more than one trial per day. A total of 18 CNO trials and 20 saline trials was analyzed from 7 Gq+ mice (3 females, 4 males) in Fig 1. A total of 17 CNO trials and 17 saline trials was analyzed from 6 Gi+ mice (2 females, 4 males) in Extended Fig 1. Behaviors for a sub-selection of animals were manually scored to identify commonly observed behaviors, as well as determine criteria for behavioral classifiers. Video recordings collected during the experiment were used for pose estimation and supervised behavioral analysis (see *Modified open field test behavioral analysis)*. Data collected from the MA devices were processed with custom Python scripts. GraphPad Prism was used to analyze group means and paired t-tests. See Extended Data Table 1 for statistics.

*Perfusion for tissue processing:* After all studies, mice were deeply anesthetized with isoflurane and underwent transcardial perfusion with phosphate-buffered saline (PBS) followed by 10% formalin and dissection of the brain for further analysis (see *Intact brain clearing and immunolabeling)*.

*Modified open field test behavioral analysis:* We created pose estimation models to track 9 body-part key-points using SLEAP6 (snout, left ear, right ear, left lateral, right lateral, centroid, tail base, tail center, and tail-tip). Missing pose-estimation data was interpolated using forward fill and the data was smoothed using a Savitsky-Golay filter across a 500ms sliding window. Grooming, rearing, and Straub tail were detected using random forest classifiers29. Freezing and circling were detected using heuristic rules as previously described30,31.

*Annotation*: Behavior was annotated in 20-min video clips obtained from the modified open field test. For fitting the Straub tail classifier, we used a sampled annotated dataset where the behavior was present in 24244 frames (808s) and behavior was absent in 627312 frames (20910s). For fitting the grooming classifier, we used a sampled annotated dataset where the behavior was present in 47005 frames (1566s) and behavior absent in 94010 frames (3133s). For fitting the rearing classifier, we used a sampled annotated dataset where the behavior was present 31596 frames (1053s) and behavior absent in 315960 frames (10530s).

*Featurization:* We featurized video and pose-estimation data using image, movement, geometry, circular- and frequentist statistical methods (see below). For acceptable runtimes, we used GPU accelerated and multiprocessing methods available through the SimBA API29 . Features were computed in metric space after calculating the pixel-to-metric conversion factors in the SimBA graphical interface.  Classifications were smoothened to remove any detected bouts less than 200ms in length. Computations are primarily dependent on numba32 and shapely33 libraries and the featurization classes are available on the SimBA GitHub repository.

*Grooming and rearing behavioral classifiers:* We used the same feature set to create classifiers for rearing and grooming. This feature set included movement and acceleration measures of individual body-parts as well as paired body-part movement Spearman correlations in sliding time windows (0.25-2s). We also computed distribution descriptive statistics (mean, variance, sum, z-scores, skew, median absolute deviations, mean absolute change, root mean square) of the animal hull geometry and animal hull sub-geometries (animal hull width, length, and area, as well as head area, posterior hull area, anterior hull area, left lateral hull area, right lateral hull area) in sliding windows of 0.25-2s. We computed Spearman correlations between the hull sub-geometry areas in the same sized sliding time-windows. Using circular statistics, we calculated descriptive statistics of animal directions including animal circular range, animal circular standard deviation, and directional vector lengths in sliding windows of 0.25-2s.

*Straub tail classifier:* For accurate Straub tail segmentation, we first performed video background subtraction and centered and egocentrically aligned the mice in the videos. Next, we defined a buffered (1.75cm in each direction) polygonal geometry using the mouse tail key-points (tail-base, tail center, tail-tip) and sliced the tail geometry from each frame. Using the tail geometry coordinates, we computed the tail geometry mean area, standard deviation, mean absolute deviation in sliding time-windows of 1-2s. For each frame, we compared the tail geometry to the tail geometry 0.5-2s seconds prior using Hausdorff distances. For the sliced images of the tails, we compared the current tail image versus the tail image 0.5-2s prior using mean squared error of the raw RGB pixel values. We also computed descriptive statistics (average, variance, sum, mean absolute change) of the tail tip and tail center movements, and the tail length in sliding windows of 1-2s.

*Feature importance:* Model Gini feature importance scores showed the following key feature determinants for each behavior: (1) *Grooming* was primarily influenced by features describing the distribution of the animal's head area, body length, and snout movement within sliding temporal windows. (2) *Rearing* was primarily driven by features capturing the distribution of the distance between the animal's ears, head area, and body width in sliding temporal windows. (3) *Straub tail* was mainly determined by features describing the distribution of the tail-tip movements, tail length and area, overall body area and right-side hull area, as well as correlations between the movements of the tail tip and tail base in sliding temporal windows. See Extended Data Table 2 for detailed feature importance.

*Performance:* Out-of-sample frame wise performance showed strong performance for grooming (precision: 0.92, recall: 0.99, f1: 0.96), rearing, (precision: 0.98, recall: 0.96, f1:  0.97) and Straub tail (precision: 0.99, recall: 0.96, f1:  0.98).  See Extended Data Table 2 for model metrics.

*Heuristic models:* Freezing and circling were detected using heuristic rules as previously described. Circling was scored as present when the directional circular range of the animal was above 320 degrees, and the animal movement (computed from the animal centroid key-point) was above 6cm in the preceding 10s time-window. Freezing was scored as present in frames where the velocity (computed from the mean movement of the nape, snout, and tail-base body-parts) fell below 5 mm/s in the preceding 3s. Although the nape body-part was not pose-estimated, this body-part was inferred as halfway between the two ears.

**Methods References:**

1. Renier, N. *et al.* Mapping of Brain Activity by Automated Volume Analysis of Immediate Early Genes. *Cell* **165**, 1789–1802 (2016).

2. Madangopal, R. *et al.* Incubation of palatable food craving is associated with brain-wide neuronal activation in mice. *Proceedings of the National Academy of Sciences* **119**, e2209382119 (2022).

3. Szelenyi, E. R. *et al.* An arginine-rich nuclear localization signal (ArgiNLS) strategy for streamlined image segmentation of single cells. *Proceedings of the National Academy of Sciences* **121**, e2320250121 (2024).

4. Rijsketic, D. R. *et al.* UNRAVELing the synergistic effects of psilocybin and environment on brain-wide immediate early gene expression in mice. *Neuropsychopharmacol.* **48**, 1798–1807 (2023).

5. Perens, J. *et al.* An Optimized Mouse Brain Atlas for Automated Mapping and Quantification of Neuronal Activity Using iDISCO+ and Light Sheet Fluorescence Microscopy. *Neuroinformatics* **19**, 433–446 (2021).

6. Jin, M. *et al.* A SMARTR workflow for multi-ensemble atlas mapping and brain-wide network analysis. 2024.07.12.603299 Preprint at https://doi.org/10.1101/2024.07.12.603299 (2024).

7. International Brain Laboratory. Behavior: Appendix 1: IBL protocol for headbar implant surgery in mice. 10437384 Bytes (2020) doi:10.6084/M9.FIGSHARE.11634726.V4.

8. International Brain Laboratory. Behavior: Appendix 2: IBL protocol for mice training. 2735505 Bytes (2020) doi:10.6084/M9.FIGSHARE.11634729.V3.

9. International Brain Laboratory. Behavior: Appendix 3: IBL protocol for setting up the behavioral training rig. 33751033 Bytes (2021) doi:10.6084/M9.FIGSHARE.11634732.V6.

10. Birman, D. *et al.* Pinpoint: trajectory planning for multi-probe electrophysiology and injections in an interactive web-based 3D environment. 2023.07.14.548952 Preprint at https://doi.org/10.1101/2023.07.14.548952 (2023).

11. Tyson, A. L. *et al.* Accurate determination of marker location within whole-brain microscopy images. *Sci Rep* **12**, 867 (2022).

12. Campbell, R., Blot, A., Crousseau & Winter, O. SainsburyWellcomeCentre/lasagna: Stable IBL. Zenodo https://doi.org/10.5281/ZENODO.3941894 (2020).

13. Faulkner, M. Ephys Atlas GUI. https://github.com/int-brain-lab/iblapps/tree/master/atlaselectrophysiology. (2020).

14. Pachitariu, M., Sridhar, S., Pennington, J. & Stringer, C. Spike sorting with Kilosort4. *Nat Methods* **21**, 914–921 (2024).

15. International Brain Laboratory *et al.* Spike sorting pipeline for the International Brain Laboratory. (2022).

16. Hill, D. N., Mehta, S. B. & Kleinfeld, D. Quality Metrics to Accompany Spike Sorting of Extracellular Signals. *Journal of Neuroscience* **31**, 8699–8705 (2011).

17. Schmitzer-Torbert, N. & Redish, A. D. Neuronal activity in the rodent dorsal striatum in sequential navigation: separation of spatial and reward responses on the multiple T task. *J Neurophysiol* **91**, 2259–2272 (2004).

18. Buccino, A. P. *et al.* SpikeInterface, a unified framework for spike sorting. *eLife* **9**, e61834 (2020).

19. Chan, K. Y. *et al.* Engineered AAVs for efficient noninvasive gene delivery to the central and peripheral nervous systems. *Nat Neurosci* **20**, 1172–1179 (2017).

20. DeNardo, L. A. *et al.* Temporal evolution of cortical ensembles promoting remote memory retrieval. *Nat. Neurosci.* **22**, 460–469 (2019).

21. Ouyang, W. *et al.* An implantable device for wireless monitoring of diverse physio-behavioral characteristics in freely behaving small animals and interacting groups. *Neuron* (2024) doi:10.1016/j.neuron.2024.02.020.

22. English, A. *et al.* A preclinical model of THC edibles that produces high-dose cannabimimetic responses. *eLife* **12**, RP89867 (2024).

23. Abraham, A. D. *et al.* Estrogen Regulation of GRK2 Inactivates Kappa Opioid Receptor Signaling Mediating Analgesia, But Not Aversion. *J Neurosci* **38**, 8031–8043 (2018).

24. Chavkin, C., Cohen, J. H. & Land, B. B. Repeated Administration of Norbinaltorphimine Produces Cumulative Kappa Opioid Receptor Inactivation. *Front Pharmacol* **10**, 88 (2019).

25. Schattauer, S. S. *et al.* Peroxiredoxin 6 mediates Gαi protein-coupled receptor inactivation by cJun kinase. *Nat Commun* **8**, 743 (2017).

26. Abraham, A. D. *et al.* Orally consumed cannabinoids provide long-lasting relief of allodynia in a mouse model of chronic neuropathic pain. *Neuropsychopharmacology* **45**, 1105–1114 (2020).

27. Hsu, Y.-W. A. *et al.* The dorsal medial habenula minimally impacts circadian regulation of locomotor activity and sleep. *Journal of biological rhythms* **32**, 444–455 (2017).

28. Amzica, F. & Steriade, M. Electrophysiological correlates of sleep delta waves. *Electroencephalogr Clin Neurophysiol* **107**, 69–83 (1998).

29. Goodwin, N. L. *et al.* Simple Behavioral Analysis (SimBA) as a platform for explainable machine learning in behavioral neuroscience. *Nat Neurosci* **27**, 1411–1424 (2024).

30. Sabnis, G. *et al.* Visual detection of seizures in mice using supervised machine learning. 2024.05.29.596520 Preprint at https://doi.org/10.1101/2024.05.29.596520 (2024).

31. Lopez, G. C. *et al.* Region-specific Nucleus Accumbens Dopamine Signals Encode Distinct Aspects of Avoidance Learning. 2024.08.28.610149 Preprint at https://doi.org/10.1101/2024.08.28.610149 (2024).

32. Lam, S. K., Pitrou, A. & Seibert, S. Numba: a LLVM-based Python JIT compiler. in *Proceedings of the Second Workshop on the LLVM Compiler Infrastructure in HPC* 1–6 (Association for Computing Machinery, New York, NY, USA, 2015). doi:10.1145/2833157.2833162.

33. Gillies, S. *et al.* Shapely. Zenodo https://doi.org/10.5281/zenodo.13345370 (2024).
