# Supplementary material for: Genetic capture for conscious state transitions
Source: Research Square preprint supplement (doi:10.21203/rs.3.rs-6192781/v1), 2025-06-19
Supplement: Supplementary file 5 [file 16397cd33ccc7fba461e6af3.xlsx]

## Sheet: Sheet1
				Mean z-scored firing rates ± SE
Cluster ID				Induction	Maintenance	Washout
1a				-0.24 ± 0.08	-0.19 ± 0.07	-0.35 ± 0.06
1b				-0.32 ± 0.06	-0.03 ± 0.06	-0.27 ± 0.04
2a				-0.48 ± 0.02	-0.11 ± 0.02	-0.18 ± 0.02
2b				-0.44 ± 0.03	-0.16 ± 0.04	-0.16 ± 0.07
3a				-0.39 ± 0.03	-0.33 ± 0.05	-0.08 ± 0.05
3b				-0.39 ± 0.03	-0.29 ± 0.07	-0.23 ± 0.06
