# Supplementary material for: Genetic capture for conscious state transitions
Source: Research Square preprint supplement (doi:10.21203/rs.3.rs-6192781/v1), 2025-06-19
Supplement: Supplementary file 6 [file 1c6c41e45fcde9f956ff77b3.docx]

**
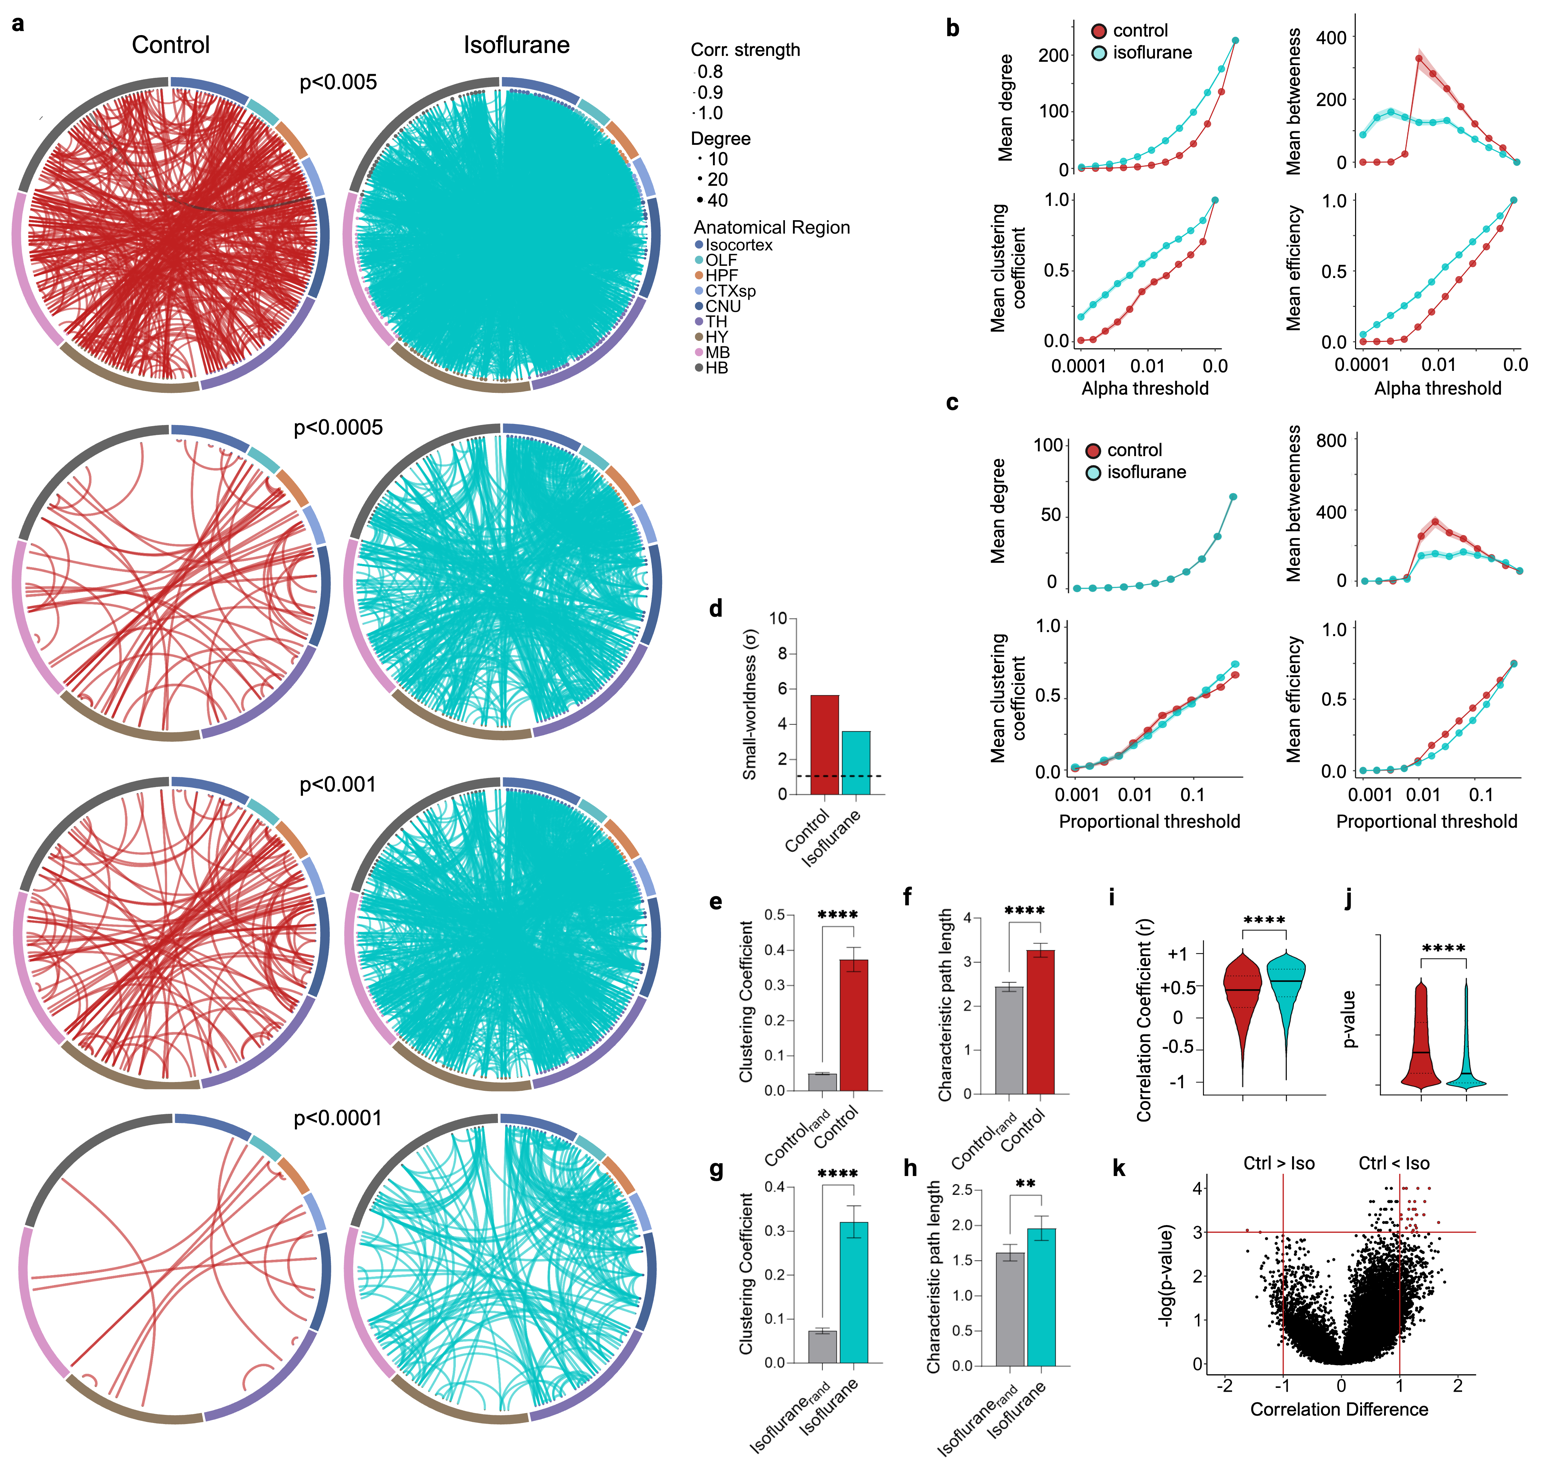
**

**Extended Figure 7. Isoflurane networks are denser across a variety of weight thresholds.** (**a**) control (red) and isoflurane (blue) networks thresholded at various alpha values. (**b**) Mean degree, clustering, betweenness, and efficiency metrics calculated across a range of significance thresholds and (**c**) edge proportion thresholds. (**d**) Assessment of small-world properties of individual networks plotted in Fig 3. Small-world index (σ) for both networks are above the threshold of 1 (black dotted horizontal line). The control network (**e**) clustering coefficient and (**f**) path length as well as the isoflurane (**g**) clustering coefficient and (**h**) path length are higher than randomly rewired networks with matching degree sequences. (**i**) Distributions of the Pearson correlation coefficients between all unique regional connections and their associated (**j**) p-value for the control and isoflurane networks. (**k**) Volcano plot illustrating the regional correlations which most differ between the networks. The horizontal red line denotes a significance threshold of p < 0.001. Red points in the upper right (control < isoflurane) and upper left quadrants (control > isoflurane), defined by vertical red line lines, indicate regional correlation differences with a magnitude shift greater than 1 between groups. Two-tailed Student’s *t*-test: **p<0.01, ****p<0.0001. Error bars represent mean ± SEM. See Extended Data Tables 6-8 for full abbreviations and detailed statistics.
