# Supplementary material for: Genetic capture for conscious state transitions
Source: Research Square preprint supplement (doi:10.21203/rs.3.rs-6192781/v1), 2025-06-19
Supplement: Supplementary file 7 [file 1ca05d36f02e018e24a6bcfc.xlsx]

## Sheet: unique_regions_analyzed
Acronym	Name
12N	Hypoglossal nucleus
7N	Facial nucleus
A24 (Cg)	Cingulate cortex
AA	Anterior amygdaloid area
AC	Anterior commissural nucleus
ACo	Anterior cortical amygdaloid nucleus
AHi	Amygdalohippocampal area
AI	Agranular insular cortex
AM	Anteromedial thalamic nucleus
ANS	Accessory neuosecretory nuclei
AO	Anterior olfactory area
AOB	Accessory olfactory bulb
AP	Area postrema
APF	Anterior perifornical nucleus
APT	Anterior pretectal nucleus
ASt	Amygdalostriatal transition area
ATg	Anterior tegmental nucleus
Acb	Accumbens nucleus
Ang	Angular thalamic nucleus
Apir	Amygdalopiriform transition area
Arc	Arcuate hypothalamic nucleus
Au1	Primary auditory cortex
B	Basal nucleus (Meynert)
BAC	Bed nucleus of the anterior commissure
BL	Basolateral amygdalar nucleus
BM	Basomedial amygdalar nucleus
Bar	Barrington nucleus
CA1	Field CA1 of the hippocampus
CA2	Field CA2 of the hippocampus
CA3	Field CA3 of the hippocampus
CG	Central gray
CL	Centrolateral thalamic nucleus
CLi	Caudal linear nucleus of the raphe
CM	Central medial thalamic nucleus
CN	Cochlear nuclei
CP	Caudate Putamen
CeA	Central amygdalar nucleus
Cir	Circulur nucleus
DCl	Dorsal claustrum
DEn	Dorsal endopiriform nucleus
DG	Dentate gyrus
DI	Dysgranular insular cortex
DPGi	Dorsal paragigantocellular nucleus
DR	Dorsal raphe nucleus
DS	Dorsal subiculum
DT	Dorsal terminal nucleus
DTM	Dorsal tuberomammillary nucleus
DTg	Dorsal tegmental nucleus
EA	Extension of the amygdala
EP	Entopeduncular nucleus
ERS	Epirubrospinal nucleus
ESO	Episupraoptic nucleus
Ect	Ectorhinal cortex
Eth	Ethmoid thalamic nucleus
FC	Fasciola cinereum
FrA	Frontal association cortex
GI	Granular insular cortex
GP	Globus pallidus
Gem	Gemini hypothalamic nucleus
Gi	Gigantocellular reticular nucleus
I	Intercalated nuclei of the amygdala
IAM	Interanteromedial thalamic nucleus
IC	Inferior colliculus
IEn	Intermediate endopiriform claustrum
IF	Interfascicular nucleus
IF5/5TT	Interfascicular trigeminar nucleus
IG	Induseum griseum
IMA	Intramedullary thalamic area
IMD	Intermediodorsal thalamic nucleus
IO	Inferior olivary nucleus
IP	Interpeduncular nucleus
IPAC	Interstitial nucleus of the posterior limb of the anterior commissure
IRt	Intermediate reticular nucleus
IS	Inferior salivatory nucleus
JPLH	Juxtaparaventricular part of lateral hypothalamus
KF	Kolliker-Fuse nucleus
LA	Lateroanterior hypothalamic nucleus
LC	Locus coeruleus
LHb	Lateral habenular nucleus
LM	Lateral mamilllary nucleus
LO	Lateral orbital cortex
LPB	Lateral parabrachial nucleus
LPO	Lateral preoptic area
LPtA	Lateral parietal association cortex
LS	Lateral septal nucleus
LSS	Lateral stripe of the striatum
La	Lateral amygdaloid nucleus
Li	Linear nucleus of the hindbrain
Lth	Lithoid nucleus
M1	Primary motor cortex
M2	Secondary motor cortex
MA3	Medial accessory oculomotor nucleus
MCLH	Magnocellular nucleus of the lateral hypothalamus
MCPC	Magnocellular nucleus of the posterior commissure
MD	Mediodorsal thalamic nucleus
MEnt	Medial entorhinal cortex
MG	Medial geniculate nucleus
MHb	Medial habenular nucleus
MO	Medial orbital cortex
MOB	Main olfactory bulb
MPB	Medial parabrachial nucleus
MPL	Medial paralemniscial nucleus
MPO	Medial preoptic nucleus
MPT	Medial pretectal area
MPtA	Medial parietal association cortex
MS	Medial septal nucleus
MT	Medial terminal nucleus
MVe	Medial vestibular nucleus
Me	Medial amygdaloid nucleus
MiTg	Microcellular tegmental nucleus
MnPO	Median preoptic nucleus
MnR	Median raphe nucleus
Nv	Navicular nucleus of the basal forebrain
OPC	Oval paracentral thalamic nucleus
OPT	Olivary pretectal nucleus
PAG	Periaqueductal gray
PBG	Parabigeminal nucleus
PCGS	Paracochlear glial substance
PCO	Posterior cortical amygdaloid area
PIL	Posterior intralaminar thalamic nucleus
PIR	Piriform cortex
PL	Paralemniscal nucleus
PLH	Peduncular lateral hypothalamus
PLi	Posterior limitans thalamic nucleus
PMn	Paramedian reticular nucleus
PMnR	Paramedian raphe nucleus
PP	Peripeduncular nucleus
PPT	Posterior pretectal nucleus
PPy	Parapyramidal nucleus
PR	Prerubral field
PRh	Perihinal cortex
PS	Parastrial nucleus
PSTh	Parasubthalamic nucleus
PTe	Paraterete nucleus
PVG	Periventricular gray
PVT	Paraventricular nucleus of the thalamus
Pa4	Paratrochlear nucleus
Pa6	Paraabducens nucleus
PaF	Parafascicular thalamic nucleus
PaR	Pararubral nucleus
PaS	Parasubiculum
PaXi	Paraxiphoid nucleus of thalamus
Pe	Periventricular hypothalamic nucleus
PeF	Perifornical nucleus
Pn	Pontine nuclei
PoMn	Posteromedian thalamic nucleus
Pr	Prepositus nucleus
Pr5	Principal sensory trigeminal nucleus
PrCnF	Precuneiform area
PrEW	Pre-Edinger-Westphal nucleus
PrS	Presubiculum
R	Red nucleus
RCh	Retrochiasmatic area
REn	Retroendopiriform nucleus
REth	Retroethmoid nucleus
RI	Rostral interstitial nucleus of the medial longitudinal fasciculus
RIP	raphe interpositus nucleus
RLi	Rostral linear nucleus (midbrain)
RM	Retromamillary nucleus
ROb	raphe obscurus nucleus
RPF	Retroparafascicular nucleus
RPa	raphe pallidus nucleus
RRF	Retrorubral field
RRe	Retrouniens area
Rbd	Rhabdoid nucleus
Re	Reuniens thalamic nucleus
ReC	Retrocommissural nucleus
Rh	Rhomboid thalamic nucleus
Rt	Reticular nucleus (prethalamus)
RtTg	Reticulotegmental nucleus of the pons
S1	Primary somatosensory cortex
S2	Secondary somatosensory cortex
SC	Superior colliculus
SCO	Subcommissural organ
SCh	Suprachiasmatic nucleus
SFO	Subfornical organ
SFi	Septofimbrial nucleus
SG	Suprageniculate thalamic nucleus
SGe	Supragenual nucleus
SHi	Septohippocampal nucleus
SHy	Septohypothalamic nucleus
SM	Nucleus of stria medullaris
SMT	Submammillothalamic nucleus
SPF	Subparafascicular thalamic nucleus
SPO	Superior paraolivary nucleus
SPTg	Subpeduncular tegmental nucleus
ST	Bed nuclei of the stria terminalis
STh	Subthalamic nucleus
Sag	Sagulum nucleus
Sc	Scaphoid thalamic nucleus
Sol	Solitary nucleus
SpVe	Spinal vestibular nucleus
Sph	Sphenoid nucleus
StA	Strial part of the preoptic area
StHy	Striohypothalamic nucleus
Su3	Supraoculomotor periaqueductal gray
Su3C	Supraoculomotor cap
Su5	Supratrigeminal nucleus
SuS	Superior salivatory nucleus
SuVe	Superior vestibular nucleus
Sub	Submedius thalamic nucleus
SubB	Subbrachial nucleus
SubI	Subincertal nucleus
TS	Triangular septal nucleus
TT	Taenia tecta
Te	Terete hypothalamic nucleus
TeA	Temporal association cortex
Tz	Nucleus of the trapezoid body
V1	Primary visual cortex
VCl	Ventral claustrum
VEn	Ventral endopiriform nucleus
VLi	Ventral linear nucleus of the thalamus
VM	Ventromedial thalamic nucleus
VMH	Ventromedial hypothalamic nucleus
VO	Ventral orbital cortex
VOLT	Vascular organ of the lamina terminalis
VP	Ventral posterior thalamic nucleus
VRe	Ventral reuniens thalamic nucleus
VTA	Ventral tegmental area
VTM	Ventral tuberomammillary nucleus
VTg	Ventral tegmental nucleus
X	Nucleus X
Y	Nucleus Y of the vestibular complex
ZI	Zona incerta
isRt	Isthmic reticular formation
mRt	Mesencephalic reticular formation
vPAL	Ventral pallidum
vSub	Ventral subiculum
Gr	Gracile nucleus
