# Supplementary material for: Genetic capture for conscious state transitions
Source: Research Square preprint supplement (doi:10.21203/rs.3.rs-6192781/v1), 2025-06-19
Supplement: Supplementary file 10 [file 6fd113b07df10c352d345075.xlsx]

## Sheet: community_nodes_with_ids
Acronym	Name	Super region	Degree	Betweenness	Community	Allen ID	Structure Order
MnPO	Median preoptic nucleus	HY	15	614.555	2	452	72800
MiTg	Microcellular tegmental nucleus	MB	10	283.536	5	2163	79710
LM	Lateral mamilllary nucleus	HY	7	264	1	210	74700
LA	Lateroanterior hypothalamic nucleus	HY	6	64.9929	4	2029	74510
LPB	Lateral parabrachial nucleus	HB	5	194	3	881	85600
vSub	Ventral subiculum	HPF	5	47.2083	4	518	46000
MPO	Medial preoptic nucleus	HY	5	19.3452	2	515	75600
Bar	Barrington nucleus	HB	4	192	6	280	87100
AC	Anterior commissural nucleus	HY	4	14.2333	2	2306	72930
Pe	Periventricular hypothalamic nucleus	HY	4	8.5	2	133	73500
CM	Central medial thalamic nucleus	TH	3	94.9333	1	599	68500
IO	Inferior olivary nucleus	HB	3	81	6	83	93500
RCh	Retrochiasmatic area	HY	3	16.9167	4	173	77800
PVT	Paraventricular nucleus of the thalamus	TH	3	13.0524	5	149	68000
MEnt	Medial entorhinal cortex	HPF	3	2.875	4	2159	44220
LC	Locus coeruleus	HB	2	216	3	147	88700
AP	Area postrema	HB	2	41	3	207	89600
PaS	Parasubiculum	HPF	2	41	1	843	44300
PoMn	Posteromedian thalamic nucleus	TH	2	41	1	2091	67210
AOB	Accessory olfactory bulb	OLF	2	4.63452	2	151	30600
VOLT	Vascular organ of the lamina terminalis	HY	2	4.63452	2	763	73000
ESO	Episupraoptic nucleus	HY	2	0.583333	4	2034	70220
CN	Cochlear nuclei	HB	2	0	4	607	89700
PaXi	Paraxiphoid nucleus of thalamus	TH	2	0	5	2039	68120
Re	Reuniens thalamic nucleus	TH	2	0	2	2092	68210
Arc	Arcuate hypothalamic nucleus	HY	1	0	3	223	71800
CeA	Central amygdalar nucleus	CNU	1	0	8	536	50300
12N	Hypoglossal nucleus	HB	1	0	8	773	96500
Ang	Angular thalamic nucleus	TH	1	0	4	2055	65910
CL	Centrolateral thalamic nucleus	TH	1	0	1	575	68700
DPGi	Dorsal paragigantocellular nucleus	HB	1	0	1	970	94900
Li	Linear nucleus of the hindbrain	HB	1	0	6	203	93800
MVe	Medial vestibular nucleus	HB	1	0	6	202	96100
MnR	Median raphe nucleus	HB	1	0	6	130	88600
PSTh	Parasubthalamic nucleus	HY	1	0	1	364	77700
DG	Dentate gyrus	HPF	1	0	1	726	39300
PrEW	Pre-Edinger-Westphal nucleus	MB	1	0	9	2130	82910
PPy	Parapyramidal nucleus	HB	1	0	9	1069	95600
SG	Suprageniculate thalamic nucleus	TH	1	0	1	325	66100
StHy	Striohypothalamic nucleus	HY	1	0	5	2023	72920
SuVe	Superior vestibular nucleus	HB	1	0	6	217	96210
Te	Terete hypothalamic nucleus	HY	1	0	5	2080	78010
Tz	Nucleus of the trapezoid body	HB	1	0	2	642	90600
VRe	Ventral reuniens thalamic nucleus	TH	1	0	5	2037	68230
VTM	Ventral tuberomammillary nucleus	HY	1	0	7	1	75500
Su3C	Supraoculomotor cap	MB	1	0	7	2152	81810
MPL	Medial paralemniscial nucleus	HB	1	0	3	2185	89040
Rbd	Rhabdoid nucleus	MB	1	0	3	2168	83210
SM	Nucleus of stria medullaris	CNU	1	0	3	2308	52810
