# Supplementary material for: Genetic capture for conscious state transitions
Source: Research Square preprint supplement (doi:10.21203/rs.3.rs-6192781/v1), 2025-06-19
Supplement: Supplementary file 11 [file 7b5f43147e030e4e4911210a.xlsx]

## Sheet: Sheet1
				Mean z-scored firing rates
Region		Highest/Lowest Units		Induction	Maintenance	Washout
Isocortex		Highest		-0.43	-0.15	-0.18
Isocortex		Lowest		-0.47	-0.39	-0.15
Hippocampus		Highest		-0.33	-0.08	-0.15
Hippocampus		Lowest		-0.24	-0.24	-0.18
Amygdala		Highest		-0.12	-0.04	-0.4
Amygdala		Lowest		-0.55	-0.28	-0.26
Thalamus		Highest		-0.29	-0.07	-0.28
Thalamus		Lowest		-0.43	-0.31	-0.19
Hypothalamus		Highest		-0.12	0.1	-0.15
Hypothalamus		Lowest		-0.39	-0.27	-0.22
