# Supplementary material for: Genetic capture for conscious state transitions
Source: Research Square preprint supplement (doi:10.21203/rs.3.rs-6192781/v1), 2025-06-19
Supplement: Supplementary file 12 [file 7d24a52da4e8bf720c46b4e2.xlsx]

## Sheet: Main Text Figure 1
Figure	Panel	Test performed	Comparison	p-value	β	SEM	95% CIs	t-value
1	b	Paired t-test, one-tailed	4 rpm rotarod saline vs. CNO	0.0003
	c-d	Linear mixed model	Time (range: -1–15 min.)	0.845	0.004	0.022	[-0.038, 0.047]	0.195
			Saline	0.15	-0.326	0.226	[-0.762, 0.111]	-1.443
			CNO	0.636	0.107	0.226	[-0.330, 0.544]	0.474
			ISO	0.082	0.394	0.226	[-0.043, 0.830]	1.745
			Time × Saline	0.655	-0.013	0.029	[-0.069, 0.043]	-0.447
			Time × CNO	0.001	0.096	0.029	[0.040, 0.153]	3.313
			Time × ISO	<0.001	0.101	0.029	[0.045, 0.158]	3.473
	e	Paired t-test, one-tailed	Mean heart rate saline vs. CNO	0.0197
	f	Paired t-test, one-tailed	Mean temperature saline vs. CNO	0.0002
	h	Paired t-test, one-tailed	Rearing saline vs. CNO	0.0032
		Paired t-test, one-tailed	Grooming saline vs. CNO	0.0202
		Paired t-test, one-tailed	Freezing saline vs. CNO	0.0386
		Paired t-test, one-tailed	Circling saline vs. CNO	0.0161
		Paired t-test, one-tailed	Straub tail saline vs. CNO	0.0032
	k	2-way ANOVA, interaction	F (4, 40) = 1.263	0.3007
		Tukey's post hoc multiple comparisons	30 minutes Gi vs Gq	0.0127
			30 minutes Gi vs. control	0.3404
			30 minutes Gq vs. control	0.0037
			60 minutes Gi vs. Gq	0.0306
			60 minutes Gi vs. control	0.3773
			60 minutes Gq vs. control	0.0063
			90 minutes Gi vs. Gq	0.0874
			90 minutes Gi vs. control	0.6348
			90 minutes Gq vs. control	0.0317
	I	2-way ANOVA, interaction	F (4, 40) = 1.786	0.1506
		Tukey's post hoc multiple comparisons	Pre Gi vs Gq	0.6513
			Pre Gi vs. control	0.763
			Pre Gq vs. control	0.25
			60 minutes Gi vs. Gq	0.06
			60 minutes Gi vs. control	0.5347
			60 minutes Gq vs. control	0.0772
			90 minutes Gi vs. Gq	0.0291
			90 minutes Gi vs. control	0.7701
			90 minutes Gq vs. control	0.0066
		2-way ANOVA, interaction	F (4, 40) = 6.011	0.0007
		Tukey's post hoc multiple comparisons	Pre Gi vs Gq	0.992
			Pre Gi vs. control	0.3776
			Pre Gq vs. control	0.1748
			60 minutes Gi vs. Gq	0.1121
			60 minutes Gi vs. control	0.6949
			60 minutes Gq vs. control	0.096
			90 minutes Gi vs. Gq	0.1048
			90 minutes Gi vs. control	0.8864
			90 minutes Gq vs. control	0.0182
		2-way ANOVA, interaction	F (4, 40) = 9.120	<0.0001
		Tukey's post hoc multiple comparisons	Pre Gi vs Gq	0.7408
			Pre Gi vs. control	0.3442
			Pre Gq vs. control	0.7111
			60 minutes Gi vs. Gq	0.02
			60 minutes Gi vs. control	0.9956
			60 minutes Gq vs. control	0.021
			90 minutes Gi vs. Gq	0.0033
			90 minutes Gi vs. control	0.9981
			90 minutes Gq vs. control	0.0034

## Sheet: Extended Figure 1
Figure	Panel	Test performed	Comparison	p-value
Extended Fig 1	a	Paired t-test, one-tailed	Non-TRAP saline vs. CNO	0.054
		Paired t-test, one-tailed	Gi-TRAP saline vs. CNO	0.4354
		Paired t-test, one-tailed	Gq-TRAP saline vs. CNO	0.0005
	b	Paired t-test, one-tailed	4 rpm rotarod saline vs. CNO	1
	c	2-way ANOVA, interaction	F (2, 15) = 6.011	0.0121
		Tukey's post hoc multiple comparisons	0-5 min Saline vs. 5mg/kg CNO	0.6997
			0-5 min Saline vs. 1mg/kg CNO	0.9669
			0-5 min 5mg/kg CNO vs. 1mg/kg CNO	0.8406
			15-20min Saline vs. 5mg/kg CNO	<0.0001
			15-20 min Saline vs. 1mg/kg CNO	0.0008
			15-20 min 5mg/kg CNO vs. 1mg/kg CNO	0.634
	d	2-way ANOVA, interaction	F (2, 12) = 1.045	0.3816
		Tukey's post hoc multiple comparisons	0-5 min Saline vs. 5mg/kg CNO	0.8788
			0-5 min Saline vs. 1mg/kg CNO	0.2563
			0-5 min 5mg/kg CNO vs. 1mg/kg CNO	0.5019
			15-20min Saline vs. 5mg/kg CNO	0.6825
			15-20 min Saline vs. 1mg/kg CNO	0.9757
			15-20 min 5mg/kg CNO vs. 1mg/kg CNO	0.8062
	f	Paired t-test, one-tailed	Rearing saline vs. CNO	0.035
		Paired t-test, one-tailed	Grooming saline vs. CNO	0.1757
		Paired t-test, one-tailed	Freezing saline vs. CNO	0.4005
		Paired t-test, one-tailed	Circling saline vs. CNO	0.1323
		Paired t-test, one-tailed	Straub tail saline vs. CNO	1
	g	Paired t-test, one-tailed	Gi Mean heart rate saline vs. CNO	0.1169
	h	Paired t-test, one-tailed	Gi Mean respiratory rate saline vs. CNO	0.7477
	i	Paired t-test, one-tailed	Gi Mean temperature saline vs. CNO	0.1464
	j	Paired t-test, one-tailed	Gq Mean respiratory rate saline vs. CNO	0.0013
