# Supplementary material for: Genetic capture for conscious state transitions
Source: Research Square preprint supplement (doi:10.21203/rs.3.rs-6192781/v1), 2025-06-19
Supplement: Supplementary file 13 [file 7d7d95fdb4560d4c196447c3.xlsx]

## Sheet: GROOMING -FEATURE IMPORTANCE
FEATURE DESCRIPTION	FEATURE IMPORTANCE MEAN (DECREASED ENTROPY)	FEATURE IMPORTANCE STDEV (DECREASED ENTROPY)
HULL LENGTH (NOSE->TAIL BASE) - ROOT MEAN SQUARE - 250MS SLIDING WINDOW	0.0236839	0.0641016
HULL LENGTH (NOSE->TAIL BASE) - SUM - 250MS SLIDING WINDOW	0.0228429	0.0626429
HULL LENGTH (NOSE->TAIL BASE) - CURRENT FRAME	0.0203475	0.0588855
HULL LENGTH (NOSE->TAIL BASE) - MEAN - 500MS SLIDING WINDOW	0.02028	0.0619693
HULL LENGTH (NOSE->TAIL BASE) - SUM - 500MS SLIDING WINDOW	0.0199648	0.0575711
HULL LENGTH (NOSE->TAIL BASE) - MEAN - 250MS SLIDING WINDOW	0.0196323	0.0574968
HULL LENGTH (NOSE->TAIL BASE) - ROOT MEAN SQUARE -500MS SLIDING WINDOW	0.0191306	0.056046
HEAD AREA MM2 - MEAN - 500MS SLIDING WINDOW	0.0164216	0.0477543
HULL LENGTH (NOSE->TAIL BASE) - ROOT MEAN SQUARE - 1000MS SLIDING WINDOW	0.0161625	0.050024
HULL LENGTH (NOSE->TAIL BASE) - SUM - 1000MS SLIDING WINDOW	0.0159157	0.0505466
HEAD AREA MM2 - SUM - 500MS SLIDING WINDOW	0.0156804	0.0442071
HULL LENGTH (NOSE->TAIL BASE) - ROOT MEAN SQUARE - 2000MS SLIDING WINDOW	0.0152447	0.0484216
HULL LENGTH (NOSE->TAIL BASE) - SUM - 2000MS SLIDING WINDOW	0.0151373	0.0496855
HULL LENGTH (NOSE->TAIL BASE) - MEAN - 1000MS SLIDING WINDOW	0.0149822	0.0494574
HEAD AREA MM2 - MEAN - 250MS SLIDING WINDOW	0.014527	0.0426977
HEAD AREA MM2 - SUM - 250MS SLIDING WINDOW	0.0145085	0.0425221
HULL LENGTH (NOSE->TAIL BASE) - MEAN - 2000MS SLIDING WINDOW	0.0139593	0.0468264
HEAD AREA MM2 - MEAN - 1000MS SLIDING WINDOW	0.0129116	0.0382269
HEAD AREA MM2 - ROOT MEAN SQUARE - 250MS SLIDING WINDOW	0.0124894	0.0361962
HEAD AREA MM2 - ROOT MEAN SQUARE - 500MS SLIDING WINDOW	0.0115854	0.0361309
HEAD AREA MM2 - CURRENT FRAME	0.0114687	0.0349437
HEAD AREA MM2 - SUM - 1000MS SLIDING WINDOW	0.0106987	0.0334993
HEAD 3POINT ANGLE (LEFT EAR->NOSE->RIGHT EAR) - CURRENT FRAME	0.010631	0.0195272
HEAD AREA MM2 - ROOT MEAN SQUARE - 1000MS SLIDING WINDOW	0.00954905	0.030137
HEAD AREA MM2 - SUM - 2000MS SLIDING WINDOW	0.00924839	0.0284136
HEAD AREA MM2 - MEAN - 2000MS SLIDING WINDOW	0.00876119	0.026378
HEAD AREA MM2 - ROOT MEAN SQUARE - 2000MS SLIDING WINDOW	0.00839279	0.0264278
HULL AREA MM2 - MEAN - 2000MS SLIDING WINDOW	0.00581714	0.0246817
HULL AREA MM2 - ROOT MEAN SQUARE - 2000MS SLIDING WINDOW	0.00566065	0.0235682
HULL AREA MM2 - MEAN - 1000MS SLIDING WINDOW	0.00555404	0.0248378
HULL AREA MM2 - SUM - 2000MS SLIDING WINDOW	0.00488741	0.0207832
HULL AREA MM2 - SUM - 1000MS SLIDING WINDOW	0.0047325	0.0212543
HULL AREA MM2 - SUM - 250MS SLIDING WINDOW	0.00422364	0.0214948
NOSE MOVEMENT MM - MEAN FRAME-BY-FRAME - 2000MS SLIDING WINDOW	0.00420647	0.00517519
HULL AREA MM2 - ROOT MEAN SQUARE - 500MS SLIDING WINDOW	0.00420128	0.0201824
NOSE MOVEMENT MM - SUM - 2000MS SLIDING WINDOW	0.00419846	0.00561134
HULL AREA MM2 - ROOT MEAN SQUARE - 1000MS SLIDING WINDOW	0.004086	0.0195173
TAIL 3POINT ANGLE (TAILBASE->MIDDLETAIL->TAIL-TIP) - CURRENT FRAME	0.00406483	0.00175855
HULL AREA MM2 - MEAN - 500MS SLIDING WINDOW	0.00393237	0.0191733
HULL AREA MM2 - SUM - 500MS SLIDING WINDOW	0.00389805	0.0187191
HULL AREA MM2 - MEAN - 250MS SLIDING WINDOW	0.00386071	0.0198963
HULL AREA MM2 - MEAN FRAMEWISE ABSOLUTE CHANGE - 500MS SLIDING WINDOW	0.00371785	0.00459588
HULL AREA MM2 - MEAN FRAMEWISE ABSOLUTE CHANGE - 1000MS SLIDING WINDOW	0.00367284	0.00462796
NOSE MOVEMENT MM - VARIANCE - 2000MS SLIDING WINDOW	0.00353838	0.00403002
HULL AREA MM2 - SUM - 1000MS SLIDING WINDOW	0.00330377	0.0105649
HULL AREA MM2 - CURRENT FRAME	0.00323857	0.0169417
LOWER HULL (CENTROID-TO-TAILBASE AND LATERAL LEFT TO LATERAL RIGHT) - SUM - 2000MS SLIDING WINDOW	0.0032049	0.00939188
HEAD AREA MM2 - MEAN FRAMEWISE ABSOLUTE CHANGE - 2000MS SLIDING WINDOW	0.00318237	0.00255283
HULL AREA MM2 - ROOT MEAN SQUARE ERROR - 200MS SLIDING WINDOW	0.00318188	0.0101879
NOSE MOVEMENT MM - MEAN - 1000MS SLIDING WINDOW	0.00317295	0.0063711

## Sheet: REARING -FEATURE IMPORTANCE
FEATURE DESCRIPTION	FEATURE IMPORTANCE MEAN (DECREASED ENTROPY)	FEATURE IMPORTANCE STDEV (DECREASED ENTROPY)
HEAD AREA MM2 - ROOT MEAN SQUARE ERROR - 500MS SLIDING WINDOW	0.0259741	0.05479
HEAD AREA MM2 - ROOT MEAN SQUARE ERROR - 250MS SLIDING WINDOW	0.0257583	0.0536908
HEAD AREA MM2 - SUM - 500MS SLIDING WINDOW	0.0255073	0.0526378
HEAD AREA MM2 - MEAN - 500MS SLIDING WINDOW	0.0254693	0.0544491
HEAD AREA MM2 - SUM - 250MS SLIDING WINDOW	0.0233086	0.052287
HEAD AREA MM2 - ROOT MEAN SQUARE ERROR - 1000MS SLIDING WINDOW	0.0226968	0.0508796
HEAD AREA MM2 - CURRENT FRAME	0.0212857	0.0475194
HEAD AREA MM2 - MEAN - 250MS SLIDING WINDOW	0.0211013	0.0483087
HEAD AREA MM2 - MEAN - 1000MS SLIDING WINDOW	0.0197134	0.0448667
HEAD AREA MM2 - SUM - 1000MS SLIDING WINDOW	0.0191994	0.0455349
HEAD AREA MM2 - ROOT MEAN SQUARE ERROR - 2000MS SLIDING WINDOW	0.0133423	0.0311507
HEAD AREA MM2 - MEAN - 2000MS SLIDING WINDOW	0.0120177	0.0292812
HEAD AREA MM2 - SUM - 2000MS SLIDING WINDOW	0.00972315	0.0234362
EAR DISTANCE - ROOT MEAN SQUARE - 250MS SLIDING WINDOW	0.00798949	0.0235069
EAR DISTANCE - SUM - 250MS SLIDING WINDOW	0.00726137	0.0218538
EAR DISTANCE - SUM - 500MS SLIDING WINDOW	0.00654857	0.019586
HEAD 3POINT ANGLE (LEFT EAR->NOSE->RIGHT EAR) - CURRENT FRAME	0.00644947	0.011819
EAR DISTANCE - CURRENT FRAME	0.00627841	0.0203154
EAR DISTANCE - ROOT MEAN SQUARE - 500MS SLIDING WINDOW	0.00601568	0.018144
EAR DISTANCE - MEAN - 500MS SLIDING WINDOW	0.00570578	0.0191429
NOSE MOVEMENT - SUM - 2000MS SLIDING WINDOW	0.00500031	0.00840928
EAR DISTANCE - ROOT MEAN SQUARE - 1000MS SLIDING WINDOW	0.00488388	0.0138538
NOSE MOVEMENT - MEAN - 2000MS SLIDING WINDOW	0.00475739	0.00807163
HEAD AREA MM2 - VARIANCE - 2000MS SLIDING WINDOW	0.00443268	0.00942337
EAR DISTANCE - MEAN - 500MS SLIDING WINDOW	0.00440066	0.016149
EAR DISTANCE - SUM - 1000MS SLIDING WINDOW	0.00428512	0.0122476
EAR DISTANCE - VARIANCE - 2000MS SLIDING WINDOW	0.00391744	0.00777852
EAR DISTANCE - VARIANCE - 1000MS SLIDING WINDOW	0.00383801	0.00703766
HEAD AREA MM2 - MEAN FRAMEWISE ABSOLUTE CHANGE - 500MS SLIDING WINDOW	0.00376126	0.00631641
HEAD AREA MM2 - MEAN FRAMEWISE ABSOLUTE CHANGE - 250MS SLIDING WINDOW	0.00364937	0.00722607
NOSE MOVEMENT - SUM - 1000MS SLIDING WINDOW	0.00358237	0.00740851
HULL WIDTH MM (LATERAL LEFT -> LATERAL RIGHT) - ROOT MEAN SQUARE - 500MS SLIDING WINDOW	0.00345709	0.00274069
NOSE MOVEMENT - MEAN - 1000MS SLIDING WINDOW	0.00333868	0.00661657
HULL WIDTH MM (LATERAL LEFT -> LATERAL RIGHT) - ROOT MEAN SQUARE - 1000MS SLIDING WINDOW	0.00332573	0.00219984
NOSE MOVEMENT - VARIANCE - 2000MS SLIDING WINDOW	0.00330755	0.00384709
HEAD AREA MM2 - VARIANCE - 1000MS SLIDING WINDOW	0.00329093	0.00455484
EAR DISTANCE - VARIANCE - 500MS SLIDING WINDOW	0.00328673	0.00633771
HULL WIDTH MM (LATERAL LEFT -> LATERAL RIGHT) - SUM - 1000MS SLIDING WINDOW	0.00323662	0.00225772
HULL WIDTH MM (LATERAL LEFT -> LATERAL RIGHT) - SUM - 500MS SLIDING WINDOW	0.00322032	0.00262138
HULL WIDTH MM (LATERAL LEFT -> LATERAL RIGHT) - ROOT MEAN SQUARE - 250MS SLIDING WINDOW	0.00318477	0.0028664
HULL LENGTH (NOSE->TAIL BASE) - SUM - 2000MS SLIDING WINDOW	0.00317041	0.00280831
HULL WIDTH MM (LATERAL LEFT -> LATERAL RIGHT) - ROOT MEAN SQUARE - 2000MS SLIDING WINDOW	0.00316872	0.00198312
HULL LENGTH (NOSE->TAIL BASE) - ROOT MEAN SQUARE ERROR - 2000MS SLIDING WINDOW	0.00316554	0.00292556
TAIL 3POINT ANGLE (TAILBASE->MIDDLETAIL->TAIL-TIP) - CURRENT FRAME	0.00311043	0.00123001
UPPER BODY AREA (CENTER -> NOSE, LEFT LATERAL -> RIGHT LATERAL) - MEAN - 2000MS SLIDING WINDOW	0.00310299	0.00254021
EAR DISTANCE - ROOT MEAN SQUARE ERROR - 2000MS SLIDING WINDOW	0.0030721	0.00571786
UPPER BODY AREA (CENTER -> NOSE, LEFT LATERAL -> RIGHT LATERAL) - ROOT MEAN SQUARE - 2000MS SLIDING WINDOW	0.00306422	0.00247142
HULL WIDTH MM (LATERAL LEFT -> LATERAL RIGHT) - SUM - 2000MS SLIDING WINDOW	0.00304071	0.00201121
HEAD AREA MM2 - MEAN FRAMEWISE ABSOLUTE CHANGE - 1000MS SLIDING WINDOW	0.00299226	0.00421958
HULL WIDTH MM (LATERAL LEFT -> LATERAL RIGHT) - SUM - 2000MS SLIDING WINDOW	0.00299109	0.00258687

## Sheet: STRAUB -FEATURE IMPORTANCE
FEATURE DESCRIPTION	FEATURE IMPORTANCE MEAN (DECREASED ENTROPY)	FEATURE IMPORTANCE STDEV (DECREASED ENTROPY)
HULL LENGTH (NOSE->TAIL BASE) - MEAN FRAMEWISE ABSOLUTE CHANGE - 2000MS SLIDING WINDOW	0.0348165	0.00812681
TAIL-TIP MOVEMENT MM - SUM - 2000MS SLIDING WINDOW	0.0318701	0.0342696
TAIL-TIP MOVEMENT MM - MEAN - 2000MS SLIDING WINDOW	0.0314265	0.0344654
HULL LENGTH (NOSE->TAIL BASE) - VARIANCE - 2000MS SLIDING WINDOW	0.0305103	0.00761017
HULL LENGTH (NOSE->TAIL BASE) - ROOT MEAN SQUARE - 2000MS SLIDING WINDOW	0.0303154	0.0127043
HULL LENGTH (NOSE->TAIL BASE) - SUM - 2000MS SLIDING WINDOW	0.0299316	0.0127695
TAIL AREA MM2 - MEAN - 2000MS SLIDING WINDOW	0.0294127	0.00658414
TAIL-TIP MOVEMENT MM - VARIANCE - 2000MS SLIDING WINDOW	0.029123	0.0272334
TAIL LENGTH MM - MEAN FRAMEWISE ABSOLUTE CHANGE - 2000MS SLIDING WINDOW	0.0267774	0.0233128
RIGHT HULL AREA MM2 (NOSE -> TAIL TIP, CENTER -> LATERAL RIGHT) - ROOT MEAN SQUARE - 2000MS SLIDING WINDOW	0.0264112	0.00939514
RIGHT HULL AREA MM2 (NOSE -> TAIL TIP, CENTER -> LATERAL RIGHT) - SUM - 2000MS SLIDING WINDOW	0.0262098	0.0095917
HULL LENGTH MM (NOSE->TAIL BASE) - ROOT MEAN SQUARE - 1000MS SLIDING WINDOW	0.0253651	0.011243
HULL LENGTH MM (NOSE->TAIL BASE) - SUM - 1000MS SLIDING WINDOW	0.0251283	0.0114592
RIGHT HULL AREA MM2 (NOSE -> TAIL TIP, CENTER -> LATERAL RIGHT) - MEAN - 2000MS SLIDING WINDOW	0.0250118	0.00916128
TAIL AREA MM2 - MEAN - 1000MS SLIDING WINDOW	0.0235718	0.00633098
TAIL LENGTH MM - VARIANCE - 2000MS SLIDING WINDOW	0.0221784	0.005124
TAIL CENTER MOVEMENT MM - VARIANCE - 2000MS SLIDING WINDOW	0.0210403	0.00768885
HULL LENGTH MM (NOSE->TAIL BASE) - MEAN - 2000MS SLIDING WINDOW	0.020843	0.0111809
TAIL-TIP MOVEMENT MM - SUM - 1000MS SLIDING WINDOW	0.0198629	0.0316146
TAIL AREA MM2 - MEAN - 500MS SLIDING WINDOW	0.0196676	0.00569698
TAIL-TIP MOVEMENT MM - MEAN - 1000MS SLIDING WINDOW	0.019616	0.0314944
TAIL AREA - STANDARD DEVIATION - 2000MS SLIDING WINDOW	0.0182991	0.00639212
HULL GEOMETRY HAUSDORF DISTANCE - 2000MS LAG	0.0174319	0.00548458
TAIL-TIP MOVEMENT MM - VARIANCE - 1000MS SLIDING WINDOW	0.0172813	0.0232734
RIGHT HULL AREA MM2 (NOSE -> TAIL TIP, CENTER -> LATERAL RIGHT) - ROOT MEAN SQUARE - 1000MS SLIDING WINDOW	0.0172476	0.00670512
RIGHT HULL AREA MM2 (NOSE -> TAIL TIP, CENTER -> LATERAL RIGHT) - SUM - 1000MS SLIDING WINDOW	0.016895	0.00687275
RIGHT HULL AREA MM2 (NOSE -> TAIL TIP, CENTER -> LATERAL RIGHT) - MEAN - 1000MS SLIDING WINDOW	0.0161236	0.00635848
RIGHT HULL AREA MM2 (NOSE -> TAIL TIP, CENTER -> LATERAL RIGHT) - ROOT MEAN SQUARE - 500MS SLIDING WINDOW	0.0156909	0.00604862
TAIL AREA MM2 - MEDIAN ABSOLUTE DEVIATION - 2000MS SLIDING WINDOW	0.0154387	0.0041401
RIGHT HULL AREA MM2 (NOSE -> TAIL TIP, CENTER -> LATERAL RIGHT) - ROOT MEAN SQUARE - 250MS SLIDING WINDOW	0.0150266	0.0060813
RIGHT HULL AREA MM2 (NOSE -> TAIL TIP, CENTER -> LATERAL RIGHT) - SUM - 250MS SLIDING WINDOW	0.0148084	0.00589448
TAIL AREA MM2 - CURRENT FRAME	0.0142379	0.00448618
TAIL CENTER MOVEMENT MM - VARIANCE - 1000MS SLIDING WINDOW	0.013073	0.00868816
TAIL-TIP AND TAILBASE MOVEMEMENT MM - SPEARMAN CORRELATION - 2000MS SLIDING WINDOW	0.0128619	0.00342128
TAIL LENGTH MM - MEAN FRAMEWISE ABSOLUTE CHANGE - 1000MS SLIDING WINDOW	0.0127167	0.0154711
TAIL AREA MM2 - STANDARD DEVIATION - 1000MS SLIDING WINDOW	0.0126953	0.00868556
TAIL IMAGE - MEAN PIXEL SQUARED ERROR - 2000MS SLIDING WINDOW	0.0126562	0.00256598
TAIL-BASE AND TAIL-END ACCELERATION MM/S - SPEARMAN CORRELATION - 2000MS SLIDING WINDOW	0.0125835	0.00259751
HULL GEOMETRY HAUSDORF DISTANCE - 1000MS LAG	0.0123985	0.00428256
TAIL GEOMETRY HAUSDORF DISTANCE - 2000MS LAG	0.012299	0.00309305
TAIL-TIP MOVEMENT MM - SUM - 500MS SLIDING WINDOW	0.0115658	0.0227468
TAIL LENGTH MM - VARIANCE - 1000MS SLIDING WINDOW	0.0114609	0.00417996
TAIL AREA MM2 - MEDIAN AVERAGE DEVIATION - 1000MS SLIDING WINDOW	0.0104671	0.00691886
TAIL-TIP MOVEMENT MM - VARIANCE - 500MS SLIDING WINDOW	0.0104618	0.0171356
TAIL-TIP MOVEMENT MM - MEAN - 500MS SLIDING WINDOW	0.00978037	0.0194312
HULL GEOMETRY HAUSDORF DISTANCE - 500MS LAG	0.00972507	0.00302773
TAIL-TIP MOVEMENT MM - VARIANCE - 250MS SLIDING WINDOW	0.00905303	0.0175822
TAIL IMAGE - MEAN PIXEL SQUARED ERROR - 1000MS SLIDING WINDOW	0.00902076	0.00213828
TAIL AREA MM2 - STANDARD DEVIATION - 500MS SLIDING WINDOW	0.0084636	0.00660433
TAIL-TIP AND TAILBASE MOVEMEMENT MM - SPEARMAN CORRELATION - 1000MS SLIDING WINDOW	0.00796639	0.00296298

## Sheet: GROOMING -MODEL METRICS
BEHAVIOR ABSENT VS PRESENT	METRIC	VALUE
PRESENT	F1	0.928
PRESENT	PRECISION	0.996
PRESENT	RECALL	0.961
PRESENT	SUPPORT	9545
ABSENT	F1	0.996
ABSENT	PRECISION	0.999
ABSENT	RECALL	0.992
ABSENT	SUPPORT	96672

## Sheet: REARING -MODEL METRICS
BEHAVIOR ABSENT VS PRESENT	METRIC	VALUE
PRESENT	F1	0.986
PRESENT	PRECISION	0.967
PRESENT	RECALL	0.976
PRESENT	SUPPORT	6327
ABSENT	F1	0.998
ABSENT	PRECISION	0.997
ABSENT	RECALL	0.999
ABSENT	SUPPORT	95612

## Sheet: STRAUB -MODEL METRICS
BEHAVIOR ABSENT VS PRESENT	METRIC	VALUE
PRESENT	F1	0.98
PRESENT	PRECISION	0.998
PRESENT	RECALL	0.963
PRESENT	SUPPORT	4868
ABSENT	F1	0.999
ABSENT	PRECISION	0.998
ABSENT	RECALL	0.999
ABSENT	SUPPORT	125444
