# Supplementary material for: Genetic capture for conscious state transitions
Source: Research Square preprint supplement (doi:10.21203/rs.3.rs-6192781/v1), 2025-06-19
Supplement: Supplementary file 15 [file b50516cfbdbed5c0cb513966.xlsx]

## Sheet: PILOT_90-180min group_DENSITY
Notes	id	structure_order	parent_id	Natural order	Name	acronym	parent_acronym	Structure_order	ROI_Volume_mm_3	CF1_180	CF2_180	CF3_180	CF4_180	CF5_180	DM1_90	DM2_90	DF3_90	DF4_90	DF5_90	DF6_180	DF7_180	DF8_180	EF1_180	EF2_180	EF3_180	EF4_180	EF5_180
	997	0		root	root	root		0	489.077	205.334	298.37	265.786	176.144	559.408	124.706	160.578	136.295	142.065	183.683	239.68	181.345	#REF!	179.56	221.141	290.907	256.209	415.589
	8	100	997	root	Basic cell groups and regions	grey	root	100	432.145	206.648	302.91	267.065	176.057	602.573	122.51	158.172	134.149	140.994	181	236.157	178.091	#REF!	188.305	233.79	302.068	265.779	431.656
	567	200	8	A	Cerebrum	CH	grey	200	266.221	203.853	333.95	299.112	160.036	778.352	106.994	134.531	114.217	122.3	142.75	199.127	149.597	#REF!	226.95	306.012	355.629	316.087	488.21
	688	300	567	1	Cerebral cortex	CTX	CH	300	211.767	178.45	330.95	280.765	158.636	876.169	92.4694	125.392	85.66	93.6074	127.673	172.784	125.576	#REF!	256.281	329.432	382.127	336.171	537.481
	695	400	688	2	Cortical plate	CTXpl	CTX	400	202.308	171.19	329.87	275.768	152.55	882.027	93.0611	123.416	80.1748	89.5072	129.288	164.19	120.406	#REF!	249.803	321.807	375.517	334.07	534.482
	315	500	695	3	Isocortex	Isocortex	CTXpl	500	123.077	153.53	318.52	276.704	133.047	1101.19	83.216	106.007	65.7067	73.0679	109.898	128.163	102.919	#REF!	190.807	284.845	345.466	284.967	519.056
	184	600	315	4	Frontal association cortex	FrA	Isocortex	600	2.42804	14.4149	5.77	5.3541	8.2371	51.8937	8.649	58.8952	10.7082	50.6581	15.6505	6.1778	2.883	#REF!	125.616	114.907	165.977	98.4333	76.1931
	68	700	184	6	Frontal pole layer 1	FrA-1	FrA	700	0.70132	15.6847	5.7	7.1294	12.8329	141.162	17.1106	42.7765	31.3694	52.7577	27.0918	11.4071	1.4259	#REF!	325.101	307.991	360.748	250.955	178.235
	667	800	184	6	Frontal pole layer 2/3	FrA-2/3	FrA	800	1.1622	17.2087	6.02	6.8835	9.4648	12.9066	6.8835	67.1141	3.4417	55.068	14.6274	6.0231	5.1626	#REF!	19.7901	27.534	61.9515	24.0922	32.6966
	2325	810	184	6	Frontal pole layer 5	FrA-5	FrA	810	0.43176	9.26441	6.95	0	0	25.4771	2.3161	81.0636	0	50.9542	4.6322	0	0	#REF!	4.6322	32.4254	23.161	27.7932	37.0576
	500	900	315	4	motor cortex	M	Isocortex	900	18.5046	35.3425	39.83	38.8551	29.8304	836.223	53.6622	59.3905	52.3652	55.8779	65.2809	37.5041	39.5036	#REF!	122.023	230.375	265.123	214.541	317.758
	985	1500	500	4	Primary motor cortex	M1	M	1500	8.92728	55.448	67.32	69.5621	47.2708	710.295	97.2301	100.367	93.5335	100.142	106.975	64.6333	67.6578	#REF!	109.104	197.261	240.611	195.02	328.992
	320	1510	985	6	Primary motor cortex layer 1	M1-1	M1	1510	1.14472	8.73576	9.61	17.4715	0	638.584	2.6207	6.9886	2.6207	5.2415	4.3679	0.8736	3.4943	#REF!	581.802	498.812	489.203	389.615	380.006
	943	1520	985	6	Primary motor cortex layer 2/3	M1-2/3	M1	1520	3.07564	14.6311	16.26	12.03	13.3306	1081.73	2.9262	13.3306	7.8033	6.8278	15.2814	7.153	17.8825	#REF!	55.9233	234.098	317.332	253.606	331.963
	648	1530	985	6	Primary motor cortex layer 5	M1-5	M1	1530	2.06064	57.749	49.5	59.2049	53.3815	586.226	55.3226	69.8812	51.9256	46.5875	91.2338	37.8523	68.4253	#REF!	25.2349	115.983	122.777	118.895	308.642
	844	1540	985	6	Primary motor cortex layer 6a	M1-6a	M1	1540	1.61544	135.567	195.61	154.138	116.996	565.79	324.37	332.417	324.989	359.654	308.894	207.374	166.518	#REF!	16.0947	86.6637	136.186	109.568	352.845
	882	1540	985	6	Primary motor cortex layer 6b	M1-6b	M1	1540	0.40572	226.757	263.73	310.559	167.603	285.911	510.204	404.22	404.22	421.473	468.303	340.136	293.306	#REF!	44.3656	81.3369	172.533	103.52	451.05
	2017	2010	985	5	Frontal cortex area 3	FrC3	M1	2010	0.62512	15.9969	24	107.179	22.3957	71.9862	17.5966	3.1994	19.1963	30.3942	41.592	4.7991	25.5951	#REF!	63.9877	92.7822	110.379	81.5843	147.172
	2334	2020	2017	6	Frontal cortex area 3 layer1	FrC3-1	FrC3	2020	0.10408	38.432	38.43	96.0799	9.608	374.712	28.824	19.216	48.04	76.864	67.256	9.608	19.216	#REF!	374.712	393.928	538.048	211.376	393.928
	2335	2020	2017	6	Frontal cortex area 3 layer2/3	FrC3-2/3	FrC3	2020	0.26076	11.5048	19.17	69.029	42.1844	3.8349	11.5048	0	15.3398	30.6796	15.3398	3.8349	30.6796	#REF!	3.8349	30.6796	30.6796	76.6989	99.7085
	2336	2040	2017	6	Frontal cortex area 3 layer5	FrC3-5	FrC3	2040	0.19376	10.322	10.32	149.67	10.322	10.322	20.6441	0	5.161	10.322	15.4831	0	10.322	#REF!	0	36.1272	20.6441	36.1272	103.221
	2337	2050	2017	6	Frontal cortex area 3 layer6a	FrC3-6a	FrC3	2050	0.06216	16.0875	64.35	160.875	0	48.2625	16.0875	0	32.175	16.0875	160.875	16.0875	48.2625	#REF!	0	32.175	16.0875	32.175	80.4376
	2351	2060	2017	6	Frontal cortex area 3 layer6b	FrC3-6b	FrC3	2060	0.00436	0	0	0	0	0	0	0	0	0	458.716	0	229.358	#REF!	0	0	0	0	0
	993	2100	500	4	Secondary motor cortex	M2	M	2100	9.57736	16.6017	14.2	10.2325	13.5737	953.603	13.0516	21.1958	13.9913	14.6178	26.4165	12.2163	13.2604	#REF!	134.066	261.241	287.971	232.736	307.287
	656	2200	993	6	Secondary motor cortex layer 1	M2-1	M2	2200	1.77644	0.562924	0.56	2.8146	0	524.082	0.5629	2.2517	0	0	1.1258	0	1.1258	#REF!	527.459	433.451	470.041	414.312	394.046
	962	2300	993	6	Secondary motor cortex layer 2/3	M2-2/3	M2	2300	3.47444	2.30253	2.88	3.7416	0.8634	1208.83	1.4391	1.1513	1.7269	0.5756	2.0147	1.7269	4.0294	#REF!	68.2124	277.167	299.329	222.194	290.694
	767	2400	993	6	Secondary motor cortex layer 5	M2-5	M2	2400	2.78784	4.66311	8.97	3.2283	6.4566	869.49	5.0218	11.4784	2.5109	3.587	6.0979	3.587	1.7935	#REF!	28.3374	195.492	208.046	154.959	272.254
	1021	2500	993	6	Secondary motor cortex layer 6a	M2-6a	M2	2500	1.44352	85.9011	51.26	35.3303	65.1186	1015.57	52.6491	85.2084	51.2636	58.8838	117.075	51.9563	53.3418	#REF!	15.9333	148.941	196.048	183.579	303.425
	1085	2600	993	6	Secondary motor cortex layer 6b	M2-6b	M2	2600	0.09512	136.669	273.34	210.261	157.696	1177.46	304.878	420.521	494.113	452.061	609.756	273.339	304.878	#REF!	84.1043	94.6173	210.261	252.313	378.469
	453	2700	315	4	Somatosensory cortex	S	Isocortex	2700	40.0892	123.674	252.89	361.868	110.903	779.387	35.0967	44.7003	40.2852	36.0446	70.9917	85.7837	62.9347	#REF!	132.754	167.826	212.601	217.016	385.964
	322	2800	453	4	Primary somatosensory cortex	S1	S	2800	33.1307	107.061	206.55	304.672	108.6	802.428	39.2989	48.7765	42.6795	39.0273	77.5716	87.8038	64.7738	#REF!	121.79	156.32	191.726	191.001	371.378
	793	2900	322	6	Primary somatosensory area undefined layer 1	S1-1	S1	2900	1.40584	234.735	475.87	416.121	226.199	1342.26	40.5719	88.9148	78.9564	61.8847	115.234	167.871	128.037	#REF!	169.294	229.756	316.537	288.795	532.066
	346	3000	793	6	Primary somatosensory area undefined layer 2/3	S1-2/3	S1-1	3000	0.29916	350.983	391.1	394.438	260.73	1179.97	22.5564	150.421	86.91	93.5954	257.387	120.337	110.309	#REF!	170.477	330.927	421.179	354.325	411.151
	865	3100	793	6	Primary somatosensory area undefined layer 4	S1-4	S1-1	3100	0.307	205.212	459.28	355.049	159.609	1732.9	10.8804	42.3453	84.6906	29.316	68.4039	110.749	91.2052	#REF!	22.8013	68.4039	211.726	133.55	459.283
	921	3200	793	6	Primary somatosensory area undefined layer 5	S1-5	S1-1	3200	0.29428	200.489	655.84	516.515	231.072	1464.59	10.392	20.3887	44.1756	27.185	57.7681	173.304	112.138	#REF!	37.3794	71.3606	159.712	118.934	380.59
	686	3300	793	6	Primary somatosensory area undefined layer 6a	S1-6a	S1-1	3300	0.2362	190.517	571.55	503.81	275.19	1342.08	44.3059	80.4403	46.5707	67.7392	71.9729	262.489	198.984	#REF!	97.3751	321.761	414.903	313.294	825.572
	719	3400	793	6	Primary somatosensory area undefined layer 6b	S1-6b	S1-1	3400	0.07808	345.799	499.49	601.947	268.955	1357.58	8.9638	25.6148	76.8443	51.2295	140.881	422.643	307.377	#REF!	230.533	281.762	204.918	332.992	832.48
	2338	3410	322	5	Primary somatosensory area jaw	S1J	S1	3410	3.6422	32.9471	41.73	184.229	42.8313	88.4081	48.3697	23.8867	23.8867	31.5743	43.1058	37.0655	30.7506	#REF!	73.3073	97.7431	80.4459	106.254	175.993
missing lvl 5	2339	3420	2338	6	Primary somatosensory area jaw layer 1	S1J-1	S1J	3420	0.5176	81.1437	77.28	131.376	75.3478	421.175	60.1685	59.8918	69.5518	61.8238	67.6198	38.6399	40.5719	#REF!	475.271	390.263	351.623	508.114	349.691
	2340	3430	2338	6	Primary somatosensory area jaw layer 2/3	S1J-2/3	S1J	3430	0.798	32.5815	51.38	233.083	60.1504	53.8847	26.0586	12.5313	13.7845	28.8221	42.6065	27.5689	35.0877	#REF!	16.2907	85.213	48.8722	65.1629	155.388
	2341	3440	2338	6	Primary somatosensory area jaw layer 4	S1J-4	S1J	3440	0.64336	13.9891	34.2	220.716	43.5215	32.6411	33.9812	7.7717	10.8804	27.9781	24.8694	52.8476	12.4347	#REF!	6.2174	41.9672	18.6521	40.4128	180.303
	2342	3450	2338	6	Primary somatosensory area jaw layer 5	S1J-5	S1J	3450	0.96228	20.784	19.74	171.468	30.1368	20.784	29.6359	12.4704	7.2744	22.8624	21.8232	35.3328	19.7448	#REF!	3.1176	24.9408	37.4111	34.2936	135.096
	2343	3460	2338	6	Primary somatosensory area jaw layer 6a	S1J-6a	S1J	3460	0.6094	31.1782	44.31	155.891	16.4096	22.9734	51.2295	42.6649	24.6144	27.8963	75.4841	29.5372	34.4601	#REF!	1.641	45.9468	36.1011	16.4096	141.122
	2344	3470	2338	6	Primary somatosensory area jaw layer 6b	S1J-6b	S1J	3470	0.11156	35.8551	26.89	134.457	17.9276	53.7827	23.063	26.8914	98.6016	26.8914	44.8189	62.7465	134.457	#REF!	0	62.7465	17.9276	26.8914	35.8551
	329	4200	322	5	Primary somatosensory cortex barrel field	S1BF	S1	4200	10.5996	153.213	333.97	408.599	145.854	994.09	47.3601	65.1909	49.4356	40.7561	103.117	140.476	83.8708	#REF!	119.249	156.326	204.535	206.139	444.638
	981	4300	329	6	Primary somatosensory cortex barrel field layer 1	S1BF-1	S1BF	4300	1.25976	130.977	146.85	104.782	119.864	925.573	93.6686	134.153	115.895	92.081	135.74	100.019	81.7616	#REF!	708.071	594.558	610.434	751.731	683.463
	201	4400	329	6	Primary somatosensory cortex barrel field layer 2/3	S1BF-2/3	S1BF	4400	2.21576	190.454	282.52	282.522	172.401	1401.33	54.1575	87.1033	65.4403	59.5732	149.836	129.075	78.5284	#REF!	80.7849	182.33	199.931	252.735	380.908
	1047	4500	329	6	Primary somatosensory cortex barrel field layer 4	S1BF-4	S1BF	4500	2.45004	186.119	403.26	368.157	180.405	943.25	42.8564	42.0401	41.2238	28.1628	86.121	144.079	58.7746	#REF!	26.5302	50.6114	86.9374	94.2842	388.157
	1070	4600	329	6	Primary somatosensory cortex barrel field layer 5	S1BF-5	S1BF	4600	2.0738	128.749	383.84	449.416	113.801	1105.7	26.5214	16.395	15.9128	11.573	49.1851	107.532	44.8452	#REF!	20.7349	56.9004	83.9039	76.1886	384.319
	1038	4700	329	6	Primary somatosensory cortex barrel field layer 6a	S1BF-6a	S1BF	4700	1.90816	121.059	357.94	680.236	127.872	743.648	34.0642	66.0322	28.2995	23.0589	116.867	157.22	125.776	#REF!	27.2514	101.669	207.53	113.198	490.525
	1062	4800	329	6	Primary somatosensory cortex barrel field layer 6b	S1BF-6b	S1BF	4800	0.69212	119.921	378.55	637.173	131.48	351.095	56.3486	95.3592	65.0176	67.9073	78.0212	290.412	195.053	#REF!	47.6796	98.2489	249.957	105.473	468.127
	337	4900	322	5	Primary somatosensory cortex hindlimb region	S1HL	S1	4900	3.57308	63.2508	103.55	123.423	82.0021	1392.92	52.3358	57.0936	51.7761	50.3767	66.0495	71.9267	73.3261	#REF!	152.25	207.104	259.44	228.374	439.117
	1030	5000	337	6	Primary somatosensory cortex hindlimb region layer 1	S1HL-1	S1HL	5000	0.39432	0	0	0	0	1171.64	0	0	0	0	0	0	0	#REF!	1049.91	623.859	694.867	623.859	562.995
	113	5100	337	6	Primary somatosensory cortex hindlimb region layer 2/3	S1HL-2/3	S1HL	5100	0.83304	8.40296	8.4	15.6055	6.0021	2344.43	18.0063	22.808	19.2068	18.0063	15.6055	3.6013	9.6034	#REF!	81.6287	342.12	396.139	357.726	446.557
	1094	5200	337	6	Primary somatosensory cortex hindlimb region layer 4	S1HL-4	S1HL	5200	0.593	121.417	114.67	129.848	102.867	1865.09	52.2766	53.9629	59.0219	32.0405	62.3946	43.8449	57.3356	#REF!	23.6088	97.8078	151.771	190.556	332.209
	1128	5300	337	6	Primary somatosensory cortex hindlimb region layer 5	S1HL-5	S1HL	5300	0.7508	61.268	75.92	170.485	115.876	1287.96	43.9531	42.6212	55.9403	23.9744	31.9659	47.9489	58.6042	#REF!	19.9787	71.9233	74.5871	79.9148	359.616
	478	5400	337	6	Primary somatosensory cortex hindlimb region layer 6a	S1HL-6a	S1HL	5400	0.76408	91.6134	218.56	221.181	142.655	604.649	88.9959	95.5397	68.0557	98.1573	142.655	176.683	137.42	#REF!	20.9402	85.0696	184.536	96.8485	520.888
	510	5500	337	6	Primary somatosensory cortex hindlimb region layer 6b	S1HL-6b	S1HL	5500	0.23784	130.34	298.52	227.043	130.34	113.522	168.18	201.816	168.18	222.839	222.839	239.657	298.52	#REF!	71.4766	134.544	151.362	105.113	462.496
	345	5600	322	5	Primary somatosensory cortex upper lip region	S1ULp	S1	5600	6.29848	95.8962	213.86	436.137	92.562	310.869	19.3698	34.6115	46.0429	33.0238	52.8699	51.7585	45.8841	#REF!	122.252	150.036	141.463	173.851	324.205
	878	5700	345	6	Primary somatosensory cortex upper lip region layer 1	S1ULp-1	S1ULp	5700	0.82148	316.502	412.67	359.108	247.115	674.393	91.2986	114.428	144.861	135.122	158.251	91.2986	108.341	#REF!	611.092	471.101	494.23	573.355	516.142
	657	5800	345	6	Primary somatosensory cortex upper lip region layer 2/3	S1ULp-2/3	S1ULp	5800	1.40128	127.027	343.97	459.58	152.718	371.803	11.4181	29.259	40.6771	32.1135	51.3816	37.8226	49.2407	#REF!	122.745	152.004	117.749	245.49	311.144
	950	5900	345	6	Primary somatosensory cortex upper lip region layer 4	S1ULp-4	S1ULp	5900	1.2816	55.3995	131.87	437.734	74.9064	233.302	2.3408	14.8252	33.5518	14.8252	20.2871	28.0899	22.628	#REF!	51.4981	75.6866	44.4757	92.8527	309.769
	974	6000	345	6	Primary somatosensory cortex upper lip region layer 5	S1ULp-5	S1ULp	6000	1.1776	42.4592	163.89	475.543	35.6658	249.66	8.4918	13.587	23.7772	10.1902	29.7215	28.0231	16.9837	#REF!	5.0951	58.5938	44.1576	40.7609	262.398
	1102	6100	345	6	Primary somatosensory cortex upper lip region layer 6a	S1ULp-6a	S1ULp	6100	1.28356	21.8143	117.64	465.892	17.1398	192.434	11.6862	26.4888	18.698	13.2444	50.6404	81.0247	47.5241	#REF!	13.2444	117.642	120.758	63.8848	310.854
	2	6200	345	6	Primary somatosensory cortex upper lip region layer 6b	S1ULp-6b	S1ULp	6200	0.33296	51.0572	39.04	267.299	18.0202	129.145	9.0101	42.0471	57.0639	12.0135	15.0168	75.0841	63.0706	#REF!	21.0235	84.0942	168.188	93.1043	231.259
	2000	6210	322	5	Primary somatosensory cortex dysgranular zone	S1DZ	S1	6210	1.60448	82.8929	96.6	206.297	83.5162	695.553	38.0185	45.4976	24.3069	37.3953	79.1534	56.0929	54.8464	#REF!	112.186	114.056	181.99	170.772	307.888
	2287	6211	2000	6	Primary somatosensory cortex dysgranular zone 1	S1DZ-1	S1DZ	6211	0.182	5.49451	5.49	0	5.4945	868.132	32.967	0	5.4945	10.989	5.4945	5.4945	0	#REF!	802.198	593.407	670.33	725.275	571.429
	2288	6212	2000	6	Primary somatosensory cortex dysgranular zone 2/3	S1DZ-2/3	S1DZ	6212	0.3504	142.694	88.47	131.279	148.402	1144.41	57.0776	99.8858	48.516	65.6393	105.594	57.0776	39.9543	#REF!	62.7854	117.009	171.233	214.041	222.603
	2289	6213	2000	6	Primary somatosensory cortex dysgranular zone 4	S1DZ-4	S1DZ	6213	0.31024	93.476	141.83	219.185	135.379	676.895	45.1264	19.3399	19.3399	35.4564	61.2429	45.1264	54.7963	#REF!	12.8932	32.2331	96.6993	83.8061	286.875
	2290	6214	2000	6	Primary somatosensory cortex dysgranular zone 5	S1DZ-5	S1DZ	6214	0.309	64.7249	93.85	216.828	48.5437	711.974	19.4175	9.7087	12.945	12.945	61.4887	9.7087	32.3625	#REF!	9.7087	29.1262	71.1974	55.0162	281.553
	2291	6215	2000	6	Primary somatosensory cortex dysgranular zone 6a	S1DZ-6a	S1DZ	6215	0.34712	86.4254	100.83	319.774	43.2127	334.178	40.3319	66.2595	28.8085	31.6893	118.115	89.3063	118.115	#REF!	2.8808	31.6893	103.71	40.3319	279.442
	2292	6216	2000	6	Primary somatosensory cortex dysgranular zone 6b	S1DZ-6b	S1DZ	6216	0.10572	28.3768	141.88	368.899	85.1305	104.048	9.4589	56.7537	9.4589	85.1305	94.5895	198.638	56.7537	#REF!	37.8358	37.8358	208.097	94.5895	368.899
	2352	6220	322	5	Primary somatosensory cortex oral dysgranular zone	S1DZO	S1	6220	0.114	8.77193	26.32	236.842	43.8596	87.7193	0	0	0	17.5439	17.5439	52.6316	35.0877	#REF!	43.8596	96.4912	140.351	61.4035	166.667
	2353	6221	2352	6	Primary somatosensory cortex oral dysgranular zone 1	S1DZO-1	S1DZO	6221	0.01484	67.3854	67.39	269.542	202.156	404.313	0	0	0	0	134.771	134.771	202.156	#REF!	336.927	134.771	471.698	471.698	336.927
	2354	6222	2352	6	Primary somatosensory cortex oral dysgranular zone 2/3	S1DZO-2/3	S1DZO	6222	0.02032	0	0	196.85	0	98.4252	0	0	0	0	0	0	0	#REF!	0	98.4252	147.638	0	147.638
	2355	6223	2352	6	Primary somatosensory cortex oral dysgranular zone 4	S1DZO-4	S1DZO	6223	0.02156	0	46.38	556.586	46.3822	0	0	0	0	92.7644	0	0	0	#REF!	0	185.529	0	0	185.529
	2356	6224	2352	6	Primary somatosensory cortex oral dysgranular zone 5	S1DZO-5	S1DZO	6224	0.02684	0	37.26	260.805	37.2578	37.2578	0	0	0	0	0	74.5156	0	#REF!	0	74.5156	37.2578	0	186.289
	2357	6225	2352	6	Primary somatosensory cortex oral dysgranular zone 6a	S1DZO-6a	S1DZO	6225	0.02332	0	0	0	0	42.8816	0	0	0	0	0	85.7633	0	#REF!	0	42.8816	214.408	0	0
	2358	6226	2352	6	Primary somatosensory cortex oral dysgranular zone 6b	S1DZO-6b	S1DZO	6226	0.00712	0	0	0	0	0	0	0	0	0	0	0	140.449	#REF!	0	0	0	0	280.899
	2041	6230	322	5	Primary somatosensory cortex shoulder region	S1Sh	S1	6230	0.77412	140.805	162.77	195.06	126.595	1489.43	71.0484	40.0455	40.0455	45.2126	94.3006	67.173	47.7962	#REF!	153.723	171.808	308.738	250.607	456.002
	2310	6231	2041	6	Primary somatosensory cortex shoulder region 1	S1Sh-1	S1Sh	6231	0.09092	0	0	0	0	1066.87	0	0	0	0	0	0	0	#REF!	879.894	725.913	626.925	560.933	516.938
	2311	6232	2041	6	Primary somatosensory cortex shoulder region 2/3	S1Sh-2/3	S1Sh	6232	0.16456	12.1536	12.15	18.2304	18.2304	2090.42	24.3072	60.7681	48.6145	78.9985	30.3841	18.2304	12.1536	#REF!	85.0754	243.072	565.143	498.298	455.761
	2312	6233	2041	6	Primary somatosensory cortex shoulder region 4	S1Sh-4	S1Sh	6233	0.17544	302.098	228	233.698	250.798	1641.59	188.099	34.1997	68.3995	56.9995	108.299	62.6995	74.0994	#REF!	28.4998	28.4998	176.699	148.199	245.098
	2313	6234	2041	6	Primary somatosensory cortex shoulder region 5	S1Sh-5	S1Sh	6234	0.1584	138.889	176.77	258.838	151.515	1830.81	44.1919	0	6.3131	50.5051	113.636	37.8788	18.9394	#REF!	37.8788	50.5051	88.3838	69.4444	397.727
	2314	6235	2041	6	Primary somatosensory cortex shoulder region 6a	S1Sh-6a	S1Sh	6235	0.13276	195.842	346.49	391.684	165.713	881.289	45.1943	90.3887	37.6619	7.5324	158.18	97.9211	82.8563	#REF!	37.6619	67.7915	263.634	143.115	745.707
	2315	6236	2041	6	Primary somatosensory cortex shoulder region 6b	S1Sh-6b	S1Sh	6236	0.05204	115.296	192.16	269.024	96.0799	326.672	96.0799	57.648	96.0799	57.648	192.16	365.104	153.728	#REF!	172.944	96.0799	172.944	96.0799	499.616
	369	6300	322	5	Primary somatosensory cortex forelimb region	S1FL	S1	6300	3.78928	54.8917	77.06	168.37	69.9341	750.274	31.9322	33.5156	28.2376	38.7936	66.2395	57.2668	52.7805	#REF!	118.228	148.049	169.425	180.773	316.419
	450	6400	369	6	Primary somatosensory cortex forelimb region layer 1	S1FL-1	S1FL	6400	0.42796	0	0	7.01	0	988.41	0	0	0	7.01	0	0	0	#REF!	878.587	670.623	586.503	672.96	633.237
	854	6500	369	6	Primary somatosensory cortex forelimb region layer 2/3	S1FL-2/3	S1FL	6500	0.87764	97.9901	67.23	83.1776	105.966	1422	35.322	29.6249	46.7162	70.644	70.644	53.5527	61.5286	#REF!	44.4374	193.701	170.913	260.927	266.624
	577	6600	369	6	Primary somatosensory cortex forelimb region layer 4	S1FL-4	S1FL	6600	0.64528	85.2343	125.53	189.065	134.825	802.752	35.6434	7.7486	23.2457	12.3977	55.7897	35.6434	37.1932	#REF!	17.0469	26.3452	88.3337	102.281	246.405
	625	6700	369	6	Primary somatosensory cortex forelimb region layer 5	S1FL-5	S1FL	6700	0.72532	27.574	45.5	220.592	53.7694	616.28	12.4083	24.8166	27.574	9.6509	38.6037	16.5444	31.7101	#REF!	12.4083	23.4379	75.8286	56.5268	242.651
	945	6800	369	6	Primary somatosensory cortex forelimb region layer 6a	S1FL-6a	S1FL	6800	0.87056	41.3527	82.71	237.778	44.7988	220.548	52.8396	68.9212	21.825	51.6909	113.72	82.7054	73.5159	#REF!	11.4869	51.6909	107.977	53.9882	326.227
	1026	6900	369	6	Primary somatosensory cortex forelimb region layer 6b	S1FL-6b	S1FL	6900	0.24252	45.3571	193.8	301.006	28.8636	61.8506	49.4805	74.2207	49.4805	90.7142	107.208	259.772	144.318	#REF!	12.3701	103.084	144.318	57.7272	309.253
	361	7000	322	5	Primary somatosensory cortex trunk region	S1Tr	S1	7000	1.32956	144.409	142.15	129.366	150.426	1340.29	76.7171	45.1277	30.0851	20.3075	102.29	75.965	63.9309	#REF!	150.426	203.075	330.184	209.844	395.62
	1006	7100	361	6	Primary somatosensory cortex trunk region layer 1	S1Tr-1	S1Tr	7100	0.17956	0	0	0	0	952.328	0	0	0	0	0	0	0	#REF!	768.545	746.269	762.976	562.486	467.81
	670	7200	361	6	Primary somatosensory cortex trunk region layer 2/3	S1Tr-2/3	S1Tr	7200	0.29616	13.5062	13.51	6.7531	6.7531	1435.04	13.5062	0	3.3766	6.7531	16.8828	6.7531	3.3766	#REF!	121.556	226.229	371.421	327.526	246.488
	1086	7300	361	6	Primary somatosensory cortex trunk region layer 4	S1Tr-4	S1Tr	7300	0.27424	113.04	142.21	80.2217	145.858	1458.58	113.04	91.161	36.4644	47.4037	207.847	65.6359	72.9288	#REF!	21.8786	87.5146	295.362	127.625	309.947
	1111	7400	361	6	Primary somatosensory cortex trunk region layer 5	S1Tr-5	S1Tr	7400	0.27176	261.26	246.54	228.143	301.737	1681.63	150.868	69.9146	66.2349	36.7972	136.149	180.306	117.751	#REF!	7.3594	55.1958	99.3524	33.1175	275.979
	9	7500	361	6	Primary somatosensory cortex trunk region layer 6a	S1Tr-6a	S1Tr	7500	0.20812	273.88	216.22	249.856	245.051	1177.21	100.903	57.659	52.8541	9.6098	129.733	110.513	96.0984	#REF!	19.2197	81.6836	211.417	134.538	720.738
	461	7600	361	6	Primary somatosensory cortex trunk region layer 6b	S1Tr-6b	S1Tr	7600	0.09972	290.814	340.95	340.955	250.702	842.359	50.1404	40.1123	0	0	100.281	90.2527	120.337	#REF!	140.393	130.365	401.123	90.2527	591.657
	378	7700	453	4	Secondary somatosensory cortex	S2	S	7700	6.95852	202.773	473.52	634.187	121.865	669.683	15.0894	25.2927	28.8855	21.8437	39.6636	76.1656	54.1782	#REF!	184.953	222.605	311.992	340.877	455.413
	873	7800	378	6	Secondary somatosensory cortex layer 1	S2-1	S2	7800	1.00796	407.754	713.32	383.944	251.994	415.691	36.7078	29.7631	52.5815	34.7236	66.4709	102.187	77.384	#REF!	606.175	403.786	493.075	644.867	408.746
	806	7900	378	6	Secondary somatosensory cortex layer 2/3	S2-2/3	S2	7900	1.48668	248.877	592.6	506.498	128.474	858.288	12.1075	18.8339	28.9235	15.4707	33.632	36.9952	28.9235	#REF!	254.93	304.033	376.678	522.641	462.776
	1035	8000	378	6	Secondary somatosensory cortex layer 4	S2-4	S2	8000	1.5144	215.927	571.84	756.735	174.327	767.301	12.5462	11.2256	17.8288	12.5462	22.4511	42.261	39.6197	#REF!	77.9186	111.595	135.367	228.473	334.786
	1090	8100	378	6	Secondary somatosensory cortex layer 5	S2-5	S2	8100	1.3302	130.807	470.61	876.56	71.4178	665.313	9.0212	15.7871	15.7871	15.7871	51.8719	65.4037	48.8648	#REF!	53.3754	133.815	224.026	147.346	381.897
	862	8200	378	6	Secondary somatosensory cortex layer 6a	S2-6a	S2	8200	1.213	64.3034	150.04	713.108	32.9761	577.082	11.5416	38.7469	38.7469	30.5029	40.3957	136.851	79.1426	#REF!	66.7766	230.833	388.293	252.267	660.346
	893	8300	378	6	Secondary somatosensory cortex layer 6b	S2-6b	S2	8300	0.40628	125.529	51.69	236.29	9.8454	536.576	12.3068	81.2248	24.6136	41.8431	17.2295	135.375	86.1475	#REF!	66.4566	155.065	344.59	238.752	622.723
	44	8400	315	4	Cingulate cortex area 24a (infralimbic)	A24a (IL)	Isocortex	8400	2.47528	551.453	613.67	535.697	350.667	855.661	669.015	579.328	544.989	568.824	627.404	582.156	640.736	#REF!	138.57	463.786	569.633	508.225	486.006
	707	8500	44	6	Cingulate cortex area 24a (infralimbic) layer 1	A24a (IL)-1	A24a (IL)	8500	0.64428	442.354	293.35	266.965	220.401	150.556	695.35	768.299	684.485	679.829	827.28	687.589	679.829	#REF!	72.9496	162.973	198.671	198.671	218.849
	747	8600	44	6	Cingulate cortex area 24a (infralimbic) layer 2/3	A24a (IL)-2	A24a (IL)	8600	0	#DIV/0!	#DIV/0!	#DIV/0!	#DIV/0!	#DIV/0!	#DIV/0!	#DIV/0!	#DIV/0!	#DIV/0!	#DIV/0!	#DIV/0!	#DIV/0!	#REF!	#DIV/0!	#DIV/0!	#DIV/0!	#DIV/0!	#DIV/0!
	556	8700	44	6	Cingulate cortex area 24a (infralimbic) layer 4	A24a (IL)-2/3	A24a (IL)	8700	0.64796	500.031	550.96	486.141	390.456	973.826	743.873	680.598	699.117	745.416	745.416	651.275	739.243	#REF!	228.409	609.606	705.29	586.456	584.913
	827	8800	44	6	Cingulate cortex area 24a (infralimbic) layer 5	A24a (IL)-5	A24a (IL)	8800	0.62412	613.664	794.72	703.39	456.643	1273.79	812.344	563.994	522.335	576.812	539.96	547.971	682.561	#REF!	182.657	701.788	850.798	778.696	690.572
	1054	8900	44	6	Cingulate cortex area 24a (infralimbic) layer 6a	A24a (IL)-6a	A24a (IL)	8900	0.41904	711.149	918.77	792.287	374.666	1040.47	443.872	281.596	252.959	210.004	367.507	434.326	472.509	#REF!	73.9786	412.848	563.192	489.213	508.305
	1081	9000	44	6	Cingulate cortex area 24a (infralimbic) layer 6b	A24a (IL)-6b	A24a (IL)	9000	0.13988	536.174	657.71	486.131	221.619	1136.69	235.917	200.172	164.427	278.81	328.853	371.747	321.704	#REF!	21.447	264.512	414.641	421.79	278.81
	1057	9100	315	4	Dysgranular insular cortex	DI	Isocortex	9100	1.91104	91.5732	292.51	647.292	63.3163	416.004	13.0819	21.4543	22.5008	26.687	27.7336	79.5378	69.0723	#REF!	264.777	400.306	465.715	432.749	607.523
	36	9200	1057	6	Dysgranular insular cortex layer 1	DI-1	DI	9200	0.2886	187.11	658.35	956.341	155.925	395.01	17.325	24.255	13.86	34.65	27.72	83.1601	69.3001	#REF!	578.656	374.22	485.101	554.401	481.635
	180	9300	1057	6	Dysgranular insular cortex layer 2/3	DI-2/3	DI	9300	0.50872	127.772	461.94	827.567	94.3545	145.463	7.8629	17.6915	17.6915	11.7943	17.6915	114.012	102.217	#REF!	149.395	304.686	442.286	379.384	520.915
	148	9400	1057	6	Dysgranular insular cortex layer 4	DI-4	DI	9400	0.22096	63.3599	280.59	710.536	54.3085	212.708	18.1028	4.5257	9.0514	40.7314	49.7828	95.0398	85.9884	#REF!	40.7314	276.068	226.285	203.657	543.085
	187	9500	1057	6	Dysgranular insular cortex layer 5	DI-5	DI	9500	0.4722	38.1194	124.95	592.969	16.942	366.37	14.8242	27.5307	38.1194	38.1194	33.8839	84.7099	57.1792	#REF!	235.07	472.257	484.964	366.37	658.619
	638	9600	1057	6	Dysgranular insular cortex layer 6a	DI-6a	DI	9600	0.40316	57.0493	32.25	255.482	19.8432	932.632	9.9216	27.2845	24.804	19.8432	22.3236	22.3236	24.804	#REF!	339.815	518.405	587.856	607.699	798.69
	662	9700	1057	6	Dysgranular insular cortex layer 6b	DI-6b	DI	9700	0.0174	57.4713	0	0	0	632.184	57.4713	0	0	0	0	0	229.885	#REF!	344.828	517.241	517.241	632.184	229.885
	677	9800	315	4	Granular insular cortex	GI	Isocortex	9800	2.07784	113.098	335.93	561.16	74.5967	285.392	13.4755	12.9943	21.1758	12.513	36.0952	82.7783	61.6024	#REF!	176.626	215.127	279.136	316.194	457.687
	897	9900	677	6	Granular insular cortex layer 1	GI-1	GI	9900	0.27256	322.865	810.83	554.006	146.757	440.27	11.0068	3.6689	22.0135	11.0068	62.3716	95.3918	58.7027	#REF!	741.121	348.547	443.939	675.081	557.675
	1106	10000	677	6	Granular insular cortex layer 2/3	GI-2/3	GI	10000	0.411	150.852	618	712.895	150.852	172.749	7.2993	9.7324	26.764	21.8978	46.2287	60.8273	36.4964	#REF!	172.749	160.584	184.915	369.83	403.893
	1010	10100	677	6	Granular insular cortex layer 4	GI-4	GI	10100	0.38388	88.5693	317.81	672.085	70.3345	130.249	10.4199	7.8149	23.4448	7.8149	33.8647	83.3594	62.5195	#REF!	44.2847	122.434	80.7544	216.213	328.228
	1058	10200	677	6	Granular insular cortex layer 5	GI-5	GI	10200	0.468	55.5556	160.26	604.701	34.188	275.641	19.2308	14.9573	12.8205	8.547	42.735	106.838	68.3761	#REF!	55.5556	183.761	277.778	205.128	519.231
	857	10300	677	6	Granular insular cortex layer 6a	GI-6a	GI	10300	0.46148	47.6727	47.67	370.547	15.1686	411.719	17.3355	10.8347	23.8364	13.0016	10.8347	65.0082	75.8429	#REF!	104.013	290.37	381.382	242.697	465.892
	849	10400	677	6	Granular insular cortex layer 6b	GI-6b	GI	10400	0.08092	37.0737	49.43	123.579	37.0737	407.81	12.3579	86.5052	12.3579	12.3579	12.3579	111.221	74.1473	#REF!	37.0737	234.8	568.463	370.736	605.536
	247	10500	315	4	Auditory cortex	Au	Isocortex	10500	5.1524	430.673	1043.2	531.985	325.673	1483.77	41.1459	89.861	45.998	43.2808	105.388	152.55	100.342	#REF!	394.962	660.081	771.485	669.979	1259.02
	1011	10600	247	4	Secondary auditory cortex dorsal area	AuD	Au	10600	1.59312	353.395	740.68	497.138	389.801	1532.84	65.2807	138.094	75.3239	72.1854	160.691	203.375	166.968	#REF!	267.4	325.148	556.141	433.74	871.246
	527	10700	1011	6	Secondary auditory cortex dorsal area layer 1	AuD-1	AuD	10700	0.22348	434.043	201.36	290.854	349.024	778.593	295.328	465.366	411.67	178.987	281.904	281.904	255.056	#REF!	957.58	487.739	912.833	760.694	778.593
	600	10800	1011	6	Secondary auditory cortex dorsal area layer 2/3	AuD-2/3	AuD	10800	0.34392	407.071	535.01	328.565	375.087	1302.63	84.3219	188.997	34.8918	136.66	276.227	212.259	110.491	#REF!	305.304	511.747	628.053	447.779	782.159
	678	10900	1011	6	Secondary auditory cortex dorsal area layer 4	AuD-4	AuD	10900	0.32592	190.231	822.29	291.483	340.574	1724.35	6.1365	21.4777	6.1365	21.4777	82.8424	113.525	61.3648	#REF!	46.0236	147.275	435.69	276.141	730.24
	252	11000	1011	6	Secondary auditory cortex dorsal area layer 5	AuD-5	AuD	11000	0.35164	352.633	898.65	625.64	406.666	1709.13	5.6876	22.7505	2.8438	0	51.1887	76.7831	145.035	#REF!	48.3449	133.659	287.226	261.631	719.486
	156	11100	1011	6	Secondary auditory cortex dorsal area layer 6a	AuD-6a	AuD	11100	0.25844	398.545	1064.08	882.216	448.847	1803.13	19.3469	100.604	46.4324	61.9099	150.905	383.068	294.072	#REF!	158.644	386.937	677.14	592.014	1319.46
	243	11200	1011	6	Secondary auditory cortex dorsal area layer 6b	AuD-16b	AuD	11200	0.08972	412.394	1025.41	791.351	490.415	2128.85	0	111.458	11.1458	55.7289	156.041	278.645	267.499	#REF!	378.957	423.54	534.998	356.665	1259.47
	1002	11300	247	4	Primary auditory cortex	Au1	Au	11300	1.69412	537.742	1318.09	625.103	384.27	1397.19	44.861	103.889	47.2222	45.4513	96.8054	166.458	94.4443	#REF!	371.875	629.826	694.756	721.909	1414.3
	735	11400	1002	6	Primary auditory cortex layer 1	Au1-1	Au1	11400	0.2328	579.897	597.08	631.443	451.031	914.948	253.436	395.189	279.21	180.412	206.186	395.189	223.368	#REF!	713.058	528.351	798.969	945.017	970.79
	251	11500	1002	6	Primary auditory cortex layer 2/3	Au1-2/3	Au1	11500	0.3216	858.209	1337.06	665.423	513.06	1029.23	27.9851	55.9701	15.5473	24.8756	77.7363	174.129	49.7512	#REF!	398.01	500.622	388.682	708.955	1004.35
	816	11600	1002	6	Primary auditory cortex layer 4	Au1-4	Au1	11600	0.35164	500.512	1657.95	494.824	312.82	1760.32	2.8438	22.7505	11.3753	11.3753	48.3449	68.2516	65.4078	#REF!	156.41	486.293	486.293	483.449	1296.78
	847	11700	1002	6	Primary auditory cortex layer 5	Au1-5	Au1	11700	0.39676	554.491	1539.97	826.696	367.981	1608.03	5.0408	68.0512	10.0817	20.1633	90.735	98.2962	108.378	#REF!	216.756	672.951	642.706	599.859	1638.27
	954	11800	1002	6	Primary auditory cortex layer 6a	Au1-6a	Au1	11800	0.29388	347.08	1398.53	622.703	394.719	1337.28	10.2082	98.6797	6.8055	44.2357	115.694	234.79	85.0687	#REF!	479.788	942.562	1170.55	997.006	1963.39
	1005	11900	1002	6	Primary auditory cortex layer 6b	Au1-6b	Au1	11900	0.09744	20.5255	605.5	133.415	92.3645	1775.45	20.5255	20.5255	0	20.5255	41.0509	20.5255	10.2627	#REF!	554.187	697.865	985.222	759.442	1683.09
	1018	12700	247	4	Secondary auditory cortex ventral area	AuV	Au	12700	1.86516	399.43	1051.92	477.171	217.676	1520.51	17.1567	35.9219	19.8374	16.6206	65.9461	96.5065	48.7894	#REF!	524.888	973.643	1025.11	824.594	1449.21
	959	12800	1018	6	Secondary auditory cortex ventral area layer 1	AuV-1	AuV	12800	0.2628	802.892	1320.4	517.504	544.14	540.335	53.2725	102.74	60.8828	53.2725	83.7139	251.142	117.96	#REF!	692.542	574.581	871.385	616.438	761.035
	755	12900	1018	6	Secondary auditory cortex ventral area layer 2/3	AuV-2/3	AuV	12900	0.38076	504.255	1321.04	336.17	215.359	1347.31	18.3843	26.2633	26.2633	7.879	57.7792	94.5477	52.5265	#REF!	556.781	906.083	845.677	976.993	1160.84
	990	13000	1018	6	Secondary auditory cortex ventral area layer 4	AuV-4	AuV	13000	0.39604	404	1249.87	659.024	194.425	1878.6	7.575	10.1	15.15	2.525	32.825	53.0249	27.775	#REF!	229.775	666.599	605.999	472.175	1057.97
	1023	13100	1018	6	Secondary auditory cortex ventral area layer 5	AuV-5	AuV	13100	0.41444	357.108	1196.8	735.933	195.445	1935.14	12.0645	38.6063	12.0645	12.0645	98.9287	103.754	57.9095	#REF!	504.295	1315.03	1182.32	909.661	1891.71
	520	13200	1018	6	Secondary auditory cortex ventral area layer 6a	AuV-6a	AuV	13200	0.31104	93.2356	327.93	160.751	64.3004	1633.23	0	19.2901	0	9.6451	57.8704	25.7202	9.6451	#REF!	790.895	1440.33	1790.77	1160.62	2311.6
	598	13300	1018	6	Secondary auditory cortex ventral area layer 6b	AuV-6b	AuV	13300	0.10008	49.96	189.85	99.9201	29.976	1268.98	29.976	39.968	0	49.96	69.944	59.952	19.984	#REF!	389.688	629.496	739.409	789.369	1388.89
	669	13400	315	4	Visual cortex	V	Isocortex	13400	15.2196	247.905	348.37	224.251	276.815	2475.89	175.695	243.174	108.61	128.65	227.339	326.225	240.546	#REF!	175.629	217.286	352.047	230.559	705.211
	2170	14010	669	4	Secondary visual cortex lateral area	V2L	V	14010	3.432	413.17	744.46	439.685	517.774	2255.83	117.424	195.221	89.7436	109.849	215.618	387.529	250.291	#REF!	211.538	246.212	448.427	306.235	820.804
	402	14100	2170	5	Secondary visual cortex lateral area anterior region	V2La	V2L	14100	2.17048	404.058	764.81	393.922	541.816	2528.47	96.7528	160.333	82.931	91.6848	186.595	376.875	268.144	#REF!	212.395	255.243	433.545	311.913	809.959
	1074	14200	402	6	Secondary visual cortex lateral area anterior region layer1	V2La-1	V2La	14200	0.3188	319.95	188.21	181.932	276.035	1191.97	159.975	326.223	175.659	144.291	125.471	175.659	94.1029	#REF!	962.986	655.583	875.157	696.361	897.114
	905	14300	402	6	Secondary visual cortex lateral area anterior region layer2/3	V2La-2/3	V2La	14300	0.44848	428.113	367.91	236.354	412.505	2512.93	220.746	256.422	86.9604	144.934	374.599	245.273	160.542	#REF!	205.137	392.437	552.979	309.936	789.333
	1114	14400	402	6	Secondary visual cortex lateral area anterior region layer4	V2La-4	V2La	14400	0.43092	368.978	1104.61	308.642	529.101	3334.73	104.428	113.71	78.901	95.1453	146.199	382.902	222.779	#REF!	34.8092	85.8628	276.153	220.459	621.925
	233	14500	402	6	Secondary visual cortex lateral area anterior region layer5	V2La-5	V2La	14500	0.48976	302.189	863.69	418.572	575.792	2456.31	12.2509	22.46	44.92	12.2509	75.5472	345.067	255.227	#REF!	18.3763	81.6727	220.516	136.802	602.336
	601	14600	402	6	Secondary visual cortex lateral area anterior region layer6a	V2La-6a	V2La	14600	0.34332	594.198	1083.54	684.493	859.257	2775.84	17.4764	122.335	66.9929	69.9056	206.804	634.976	518.467	#REF!	66.9929	218.455	413.608	358.266	1188.4
	649	14700	402	6	Secondary visual cortex lateral area anterior region layer6b	V2La-6b	V2La	14700	0.1392	517.241	1178.16	847.701	704.023	2787.36	21.5517	193.965	43.1034	122.126	186.782	718.391	581.897	#REF!	107.759	122.126	323.276	222.701	1056.03
	409	14800	2170	5	Secondary visual cortex lateral area intermediate region	V2Li	V2L	14800	0.81196	453.224	910.14	581.309	475.393	1979.16	102.222	211.833	94.8323	102.222	215.528	339.918	221.686	#REF!	197.054	220.454	491.404	318.981	780.827
	421	14900	409	6	Secondary visual cortex lateral area intermediate region layer1	V2Li-1	V2Li	14900	0.11068	415.613	469.82	487.893	551.138	1147.45	352.367	415.613	406.577	262.017	352.367	596.314	289.122	#REF!	849.295	632.454	957.716	641.489	677.629
	973	15000	409	6	Secondary visual cortex lateral area intermediate region layer2/3	V2Li-2/3	V2Li	15000	0.14792	392.104	689.56	473.229	473.229	1825.31	202.812	277.177	94.6458	148.729	324.5	304.219	236.614	#REF!	229.854	270.416	466.468	283.937	655.76
	573	15100	409	6	Secondary visual cortex lateral area intermediate region layer4	V2Li-4	V2Li	15100	0.15588	218.116	1013.6	340.005	295.099	2412.11	12.8304	76.9823	12.8304	12.8304	44.9063	102.643	44.9063	#REF!	6.4152	25.6608	153.965	70.5671	340.005
	613	15200	409	6	Secondary visual cortex lateral area intermediate region layer5	V2Li-5	V2Li	15200	0.17476	612.268	1098.65	698.1	343.328	2140.08	0	22.8885	11.4443	5.7221	114.443	74.3877	183.108	#REF!	28.6107	102.998	417.716	188.83	749.6
	74	15300	409	6	Secondary visual cortex lateral area intermediate region layer6a	V2Li-6a	V2Li	15300	0.1806	620.155	1112.96	880.399	681.063	2303.43	66.4452	382.06	71.9823	160.576	332.226	647.841	365.449	#REF!	138.428	254.707	681.063	531.562	1389.81
	121	15400	409	6	Secondary visual cortex lateral area intermediate region layer6b	V2Li-6b	V2Li	15400	0.04212	261.159	807.22	332.384	617.284	1044.63	0	0	23.7417	0	23.7417	451.092	189.934	#REF!	23.7417	23.7417	94.9668	142.45	641.026
	425	15500	2170	5	Secondary visual cortex lateral area posterior region	V2Lp	V2L	15500	0.44956	384.821	347.01	404.84	478.245	1439.18	244.684	333.66	113.444	211.318	355.904	524.958	215.767	#REF!	233.562	249.132	442.655	255.806	945.369
	750	15600	425	6	Secondary visual cortex lateral area posterior region layer1	V2Lp-1	V2Lp	15600	0.0612	571.895	637.25	555.556	620.915	1258.17	604.575	539.216	408.497	506.536	490.196	571.895	408.497	#REF!	882.353	784.314	882.353	375.817	735.294
	269	15700	425	6	Secondary visual cortex lateral area posterior region layer2/3	V2Lp-2/3	V2Lp	15700	0.09	466.667	322.22	522.222	544.444	1577.78	466.667	511.111	222.222	444.444	733.333	611.111	433.333	#REF!	188.889	244.444	533.333	300	1088.89
	869	15800	425	6	Secondary visual cortex lateral area posterior region layer4	V2Lp-4	V2Lp	15800	0.09336	428.449	332.05	278.492	374.893	1670.95	171.38	246.358	53.5561	128.535	353.47	546.273	128.535	#REF!	85.6898	21.4225	257.069	107.112	749.786
	902	15900	425	6	Secondary visual cortex lateral area posterior region layer15	V2Lp-5	V2Lp	15900	0.12208	327.654	278.51	425.95	491.481	1392.53	57.3394	253.932	0	24.574	147.444	344.037	114.679	#REF!	98.2962	163.827	286.697	163.827	819.135
	377	16000	425	6	Secondary visual cortex lateral area posterior region layer6a	V2Lp-6a	V2Lp	16000	0.07468	214.247	200.86	307.981	428.495	1312.27	107.124	214.248	13.3905	120.514	174.076	656.133	93.7333	#REF!	187.466	267.809	495.447	441.885	1446.17
	393	16100	425	6	Secondary visual cortex lateral area posterior region layer6b	V2Lp-6b	V2Lp	16100	0.00824	0	970.87	0	121.359	485.437	0	121.359	0	0	0	485.437	0	#REF!	0	0	121.359	242.718	485.437
	2096	16110	669	4	Secondary Visual Cortex Medial area	V2M	V	16110	4.09736	48.0797	46.86	49.5441	67.8486	2299.04	82.2481	120.321	66.1401	73.706	100.064	108.851	84.4446	#REF!	206.474	259.191	366.333	259.435	632.846
	2097	16120	2096	5	Secondary visual cortex mediolateral area	V2ML	V2M	16120	1.48572	55.1921	50.48	45.096	70.6728	2583.93	119.134	151.442	101.634	91.5381	153.461	176.345	115.769	#REF!	251.73	284.037	419.998	259.134	623.267
	2393	16130	2097	6	Secondary visual cortex mediolateral area layer1	V2ML-1	V2ML	16130	0.23164	0	0	4.317	0	1217.41	0	0	0	0	0	0	0	#REF!	1044.72	716.629	802.97	526.679	1066.31
	2409	16140	2097	6	Secondary visual cortex mediolateral area layer2/3	V2ML-2/3	V2ML	16140	0.41248	0	0	4.8487	0	2766.19	0	0	0	0	0	0	0	#REF!	278.801	460.628	647.304	295.772	586.695
	2410	16150	2097	6	Secondary visual cortex mediolateral area layer4	V2ML-4	V2ML	16150	0.18564	26.9339	16.16	43.0942	16.1603	3512.17	0	10.7735	0	5.3868	16.1603	0	10.7735	#REF!	16.1603	91.5751	398.621	161.603	711.054
	2411	16160	2097	6	Secondary visual cortex mediolateral area layer5	V2ML-5	V2ML	16160	0.35536	92.8636	47.84	25.3264	61.909	2279.38	95.6776	126.632	92.8636	98.4917	137.888	171.657	104.12	#REF!	11.2562	47.8388	104.12	129.446	287.033
	2412	16170	2097	6	Secondary visual cortex mediolateral area layer6a	V2ML-6a	V2ML	16170	0.23068	138.72	177.74	138.72	251.431	3116.87	450.841	550.546	351.136	273.106	511.531	615.571	368.476	#REF!	39.0151	117.045	221.085	251.431	754.292
	2413	16180	2097	6	Secondary visual cortex mediolateral area layer6b	V2ML-6b	V2ML	16180	0.06992	171.625	200.23	214.531	314.645	3360.98	557.78	729.405	529.176	529.176	829.519	843.822	686.499	#REF!	14.3021	71.5103	128.719	100.114	414.76
	394	16200	2096	5	Secondary visual cortex mediomedial area anterior region	V2MMa	V2M	16200	1.40012	14.9987	25	32.1401	57.8522	2141.24	32.8543	61.4233	25.7121	30.7117	51.4242	31.4259	25.7121	#REF!	225.695	255.692	392.824	332.114	611.376
	281	16300	394	6	Secondary visual cortex mediomedial area anterior region layer1	V2MMa-1	V2MMa	16300	0.24216	0	0	0	0	995.21	0	0	0	0	0	0	0	#REF!	730.922	755.699	739.181	466.634	656.591
	1066	16400	394	6	Secondary visual cortex mediomedial area anterior region layer2/3	V2MMa-2/3	V2MMa	16400	0.39768	0	0	2.5146	0	2439.15	0	0	0	0	7.5438	0	0	#REF!	248.944	294.206	523.034	311.808	691.511
	401	16500	394	6	Secondary visual cortex mediomedial area anterior region layer4	V2MMa-4	V2MMa	16500	0.04924	0	0	20.3087	0	3330.63	0	0	0	0	0	0	0	#REF!	60.9261	162.47	182.778	162.47	528.026
	433	16600	394	6	Secondary visual cortex mediomedial area anterior region layer5	V2MMa-5	V2MMa	16600	0.36548	5.47226	10.94	8.2084	5.4723	1830.47	16.4168	24.6252	5.4723	5.4723	5.4723	5.4723	8.2084	#REF!	16.4168	46.5142	186.057	240.779	478.822
	1046	16700	394	6	Secondary visual cortex mediomedial area anterior region layer6a	V2MMa-6a	V2MMa	16700	0.28428	56.2825	91.46	87.9415	182.918	2648.8	80.9061	196.989	59.8002	87.9415	144.224	80.9061	63.3179	#REF!	94.9768	102.012	274.377	393.978	689.461
	441	16800	394	6	Secondary visual cortex mediomedial area anterior region layer6b	V2MMa-6b	V2MMa	16800	0.06128	48.9556	81.59	244.778	440.601	3280.03	277.415	342.689	277.415	261.097	424.282	310.052	244.778	#REF!	65.2742	65.2742	130.548	326.371	407.963
	533	16900	2096	5	Secondary visual cortex mediomedial area posterior region	V2MMp	V2M	16900	1.21152	77.5885	67.68	75.1123	75.9377	2132.03	94.0967	150.225	69.3344	101.525	90.795	115.557	113.906	#REF!	128.764	232.766	269.909	175.812	669.407
	805	17000	533	6	Secondary visual cortex mediomedial area posterior region layer1	V2MMp-1	V2MMp	17000	0.3036	65.8762	52.7	39.5257	65.8762	1739.13	46.1133	72.4638	59.2885	55.9947	59.2885	59.2885	98.8142	#REF!	467.721	592.885	507.246	329.381	698.287
	41	17100	533	6	Secondary visual cortex mediomedial area posterior region layer2/3	V2MMp-2/3	V2MMp	17100	0.33012	39.3796	30.29	63.6132	51.4964	2111.35	66.6424	87.8468	24.2336	42.4088	54.5256	66.6424	42.4088	#REF!	21.2044	209.015	230.219	160.548	354.417
	501	17200	533	6	Secondary visual cortex mediomedial area posterior region layer4	V2MMp-4	V2MMp	17200	0.1524	39.3701	52.49	59.0551	26.2467	1791.34	72.1785	78.7402	32.8084	45.9318	59.0551	65.6168	72.1785	#REF!	0	13.1234	137.795	45.9318	636.483
	565	17300	533	6	Secondary visual cortex mediomedial area posterior region layer5	V2MMp-5	V2MMp	17300	0.23936	146.223	146.22	125.334	116.979	2047.13	121.156	196.357	137.868	171.29	104.445	133.69	150.401	#REF!	0	41.7781	91.9118	83.5561	522.226
	257	17400	533	6	Secondary visual cortex mediomedial area posterior region layer6a	V2MMp-6a	V2MMp	17400	0.1724	116.009	63.81	104.408	127.61	3167.05	208.817	382.831	116.009	237.819	203.016	336.427	243.619	#REF!	40.6032	110.209	307.425	185.615	1386.31
	469	17500	533	6	Secondary visual cortex mediomedial area posterior region layer6b	V2MMp-6b	V2MMp	17500	0.01364	0	146.63	73.3138	73.3138	3592.38	146.628	439.883	0	219.941	366.569	0	366.569	#REF!	0	146.628	73.3138	73.3138	1539.59
	385	17600	669	4	Primary visual cortex	V1	V	17600	7.6902	280.617	332.24	221.191	280.617	2668.33	251.489	330.03	139.658	166.316	300.382	414.684	319.368	#REF!	143.169	182.05	301.423	181.4	692.18
	593	17700	385	6	Primary visual cortex layer1	V1-1	V1	17700	0.49504	103.022	30.3	84.8416	96.9619	1565.53	78.7815	105.042	74.7414	101.002	90.9017	101.002	50.501	#REF!	606.012	775.695	832.256	527.23	904.977
	821	17800	385	6	Primary visual cortex layer2/3	V1-2/3	V1	17800	0.73192	155.755	97.01	124.331	116.133	2815.88	140.726	200.842	161.22	128.429	170.784	170.784	110.668	#REF!	50.552	202.208	342.934	178.981	676.303
	721	17900	385	6	Primary visual cortex layer4	V1-4	V1	17900	0.58836	232.851	205.66	175.063	203.957	2908.08	260.045	380.719	158.066	207.356	237.95	345.027	232.851	#REF!	13.5971	47.5899	180.162	132.572	1002.79
	778	18000	385	6	Primary visual cortex layer5	V1-5	V1	18000	0.4622	173.085	348.33	149.286	300.736	2823.45	250.974	341.843	112.505	142.795	205.539	484.639	255.301	#REF!	19.4721	73.5612	160.104	114.669	835.136
	33	18100	385	6	Primary visual cortex layer6a	V1-6a	V1	18100	0.35004	268.541	345.67	257.113	234.259	3448.18	114.273	139.984	54.2795	59.9931	134.27	408.525	222.832	#REF!	31.425	94.2749	348.532	242.829	1345.56
	305	18200	385	6	Primary visual cortex layer6b	V1-6b	V1	18200	0.07616	525.21	525.21	538.34	525.21	3413.87	157.563	196.954	52.521	91.9118	459.559	695.903	538.34	#REF!	52.521	157.563	183.823	183.823	840.336
	2098	18210	385	5	Primary visual cortex monocular area	V1M	V1	18210	2.42124	175.117	168.1	120.599	147.858	2371.51	248.22	271.762	142.076	134.642	281.261	315.954	257.306	#REF!	154.466	164.379	292.825	143.728	571.195
	2428	18220	2098	6	Primary visual cortex monocular area layer1	V1M-1	V1M	18220	0.33116	0	0	0	0	1313.56	0	0	0	0	0	0	0	#REF!	963.281	739.824	866.651	603.938	658.292
	2429	18230	2098	6	Primary visual cortex monocular area layer2/3	V1M-2/3	V1M	18230	0.55868	34.0087	12.53	21.4792	19.6893	2806.62	12.5295	60.8577	32.2188	7.1597	37.5886	5.3698	19.6893	#REF!	75.1772	173.624	354.407	118.136	411.685
	2430	18240	2098	6	Primary visual cortex monocular area layer4	V1M-4	V1M	18240	0.4216	135.199	92.5	71.1575	147.059	2352.94	192.125	158.918	90.1328	104.364	194.497	206.357	144.687	#REF!	11.8596	40.3226	239.564	73.5294	887.097
	2431	18250	2098	6	Primary visual cortex monocular area layer5	V1M-5	V1M	18250	0.54148	214.228	280.71	142.203	171.751	1955.75	402.6	380.439	208.687	208.687	350.89	496.787	363.818	#REF!	1.8468	24.0083	96.0331	33.2422	325.035
	2432	18260	2098	6	Primary visual cortex monocular area layer6a	V1M-6a	V1M	18260	0.41912	353.121	360.28	245.753	307.788	3037.32	524.909	560.699	291.086	288.7	658.523	663.294	606.032	#REF!	9.5438	50.105	138.385	62.0347	751.575
	2433	18270	2098	6	Primary visual cortex monocular area layer16b	V1M-6b	V1M	18270	0.1492	563.003	388.74	469.169	422.252	2781.5	502.681	777.48	355.228	294.906	750.67	857.909	670.241	#REF!	20.1072	33.5121	87.1314	46.9169	469.169
	2133	18280	385	5	Primary visual cortex binocular area	V1B	V1	18280	2.49736	478.105	641.48	382.003	512.541	2970.74	343.563	482.91	151.36	229.843	449.274	647.083	536.567	#REF!	134.542	135.343	238.652	158.968	573.405
	2434	18290	2133	6	Primary visual cortex binocular area layer1	V1B-1	V1B	18290	0.32868	103.444	6.08	57.807	109.529	1764.63	33.4672	76.0618	82.1468	30.4247	33.4672	33.4672	9.1274	#REF!	909.699	708.896	1040.53	635.877	800.17
	2435	18291	2133	6	Primary visual cortex binocular area layer2/3	V1B-2/3	V1B	18291	0.52832	412.629	263.1	268.776	353.952	4054.36	408.843	433.449	244.17	257.42	397.486	363.416	191.172	#REF!	39.7486	100.318	185.494	123.031	418.307
	2436	18292	2133	6	Primary visual cortex binocular area layer4	V1B-4	V1B	18292	0.45152	460.666	648.92	263.554	385.365	3339.83	602.41	622.342	188.253	283.487	520.464	717.576	524.894	#REF!	8.859	26.5769	66.4422	73.0865	617.913
	2437	18293	2133	6	Primary visual cortex binocular area layer5	V1B-5	V1B	18293	0.5544	582.612	1008.3	470.779	582.612	2543.29	243.506	440.115	66.7388	156.926	425.685	665.584	739.538	#REF!	9.0188	23.4488	72.1501	61.3276	447.33
	2438	18294	2133	6	Primary visual cortex binocular area layer6a	V1B-6a	V1B	18294	0.47456	733.311	963	691.167	937.711	3194.54	423.55	794.42	179.113	387.728	769.134	1234.83	1051.5	#REF!	14.7505	50.5732	155.934	99.0391	802.849
	2439	18295	2133	6	Primary visual cortex binocular area layer6b	V1B-6b	V1B	18295	0.15988	394.046	950.71	531.649	719.289	1644.98	143.858	312.735	93.8204	181.386	406.555	838.129	562.922	#REF!	0	18.7641	75.0563	56.2922	250.188
	31	18300	315	4	Cingulate cortex	A24 (Cg)	Isocortex	18300	3.69212	128.382	164.95	106.443	98.5883	1449.03	197.447	222.907	198.531	209.906	215.323	236.45	252.7	#REF!	79.0874	313.099	318.787	285.202	407.625
	2345	18810	31	4	Cingulate cortex area 24b	A24b (Cg1)	A24 (Cg)	18810	2.14288	64.3993	69.07	45.7328	36.3996	1444.78	111.532	88.1991	97.0656	97.999	84.4658	68.1326	105.932	#REF!	85.8658	439.129	423.729	374.263	527.794
	2346	18820	2345	6	Cingulate cortex area 24b layer1	A24b (Cg1)-1	A24b (Cg1)	18820	0.52848	0	0	0	0	444.671	0	0	0	0	0	0	0	#REF!	189.222	420.073	440.887	350.061	505.223
	2347	18830	2345	6	Cingulate cortex area 24b layer2/3	A24b (Cg1)-2/3	A24b (Cg1)	18830	0.67508	7.40653	8.89	0	7.4065	2347.87	2.9626	10.3691	2.9626	7.4065	11.8504	2.9626	8.8878	#REF!	62.2148	617.705	497.719	396.99	619.186
	2348	18840	2345	6	Cingulate cortex area 24b layer5	A24b (Cg1)-5	A24b (Cg1)	18840	0.55096	74.4156	45.38	39.9303	56.2654	1461.09	132.496	101.641	132.496	165.166	130.681	85.3056	177.871	#REF!	41.7453	332.147	299.477	344.853	390.228
	2349	18850	2345	6	Cingulate cortex area 24b layer6a	A24b (Cg1)-6a	A24b (Cg1)	18850	0.3292	203.524	267.31	191.373	97.2053	1294.05	410.085	285.541	288.578	291.616	203.524	230.863	312.88	#REF!	54.678	318.955	443.499	410.085	619.684
	2350	18860	2345	6	Cingulate cortex area 24b layer6b	A24b (Cg1)-6b	A24b (Cg1)	18860	0.05916	422.583	490.2	219.743	169.033	760.649	490.196	540.906	642.326	304.26	574.713	354.97	338.066	#REF!	16.9033	236.646	473.293	405.68	456.389
	39	18900	31	4	Cingulate cortex area 24b'	A24b' (Cg1)	A24 (Cg)	18900	0.73224	23.2164	58.72	24.5821	65.5523	2320.28	80.5747	103.791	75.112	87.403	84.6717	107.888	111.985	#REF!	124.276	195.291	233.53	236.261	327.761
	935	19000	39	6	Cingulate cortex area 24b' layer1	A24b' (Cg1)-1	A24b' (Cg1)	19000	0.18164	0	0	0	0	682.669	0	0	0	0	0	0	0	#REF!	390.883	390.883	396.389	440.432	418.41
	211	19100	39	6	Cingulate cortex area 24b' layer2/3	A24b' (Cg1)-2/3	A24b' (Cg1)	19100	0.24776	4.03616	0	0	20.1808	3362.12	0	0	0	4.0362	8.0723	0	12.1085	#REF!	52.4701	181.627	266.387	270.423	423.797
	1015	19200	39	6	Cingulate cortex area 24b' layer5	A24b' (Cg1)-5	A24b' (Cg1)	19200	0.19736	20.2675	65.87	10.1338	70.9364	2746.25	91.2039	70.9364	81.0701	86.137	96.2708	121.605	146.94	#REF!	5.0669	86.137	91.2039	50.6688	177.341
	919	19300	39	6	Cingulate cortex area 24b' layer6a	A24b' (Cg1)-6a	A24b' (Cg1)	19300	0.09496	115.838	273.8	136.9	252.738	1927.13	410.699	579.191	368.576	400.168	379.107	494.945	516.007	#REF!	63.1845	84.246	147.43	147.43	242.207
	927	19400	39	6	Cingulate cortex area 24b' layer6b	A24b' (Cg1)-6b	A24b' (Cg1)	19400	0.01052	95.057	380.23	285.171	475.285	1615.97	190.114	665.399	380.228	760.456	475.285	760.456	95.057	#REF!	0	190.114	95.057	190.114	95.057
	48	19500	31	4	Cingulate cortex area 24a'	A24a' (Cg2)	A24 (Cg)	19500	0.817	390.453	511.63	339.045	291.31	679.315	527.54	682.986	575.275	613.219	675.643	793.146	763.77	#REF!	20.8078	88.1273	119.951	95.4712	164.015
	588	19600	48	6	Cingulate cortex area 24a' layer1	A24a' (Cg2)-1	A24a' (Cg2)	19600	0.20676	473.979	454.63	299.865	295.028	304.701	532.018	604.566	677.114	710.969	793.19	730.315	880.248	#REF!	58.0383	164.442	241.826	178.951	275.682
	296	19700	48	6	Cingulate cortex area 24a' layer2/3	A24a' (Cg2)-2/3	A24a' (Cg2)	19700	0.28468	330.195	400.45	291.555	281.017	997.611	474.217	470.704	523.395	498.806	734.158	864.128	597.162	#REF!	14.0509	105.382	122.945	94.8433	175.636
	772	19800	48	6	Cingulate cortex area 24a' layer5	A24a' (Cg2)-5	A24a' (Cg2)	19800	0.14648	361.824	600.76	395.959	273.075	689.514	546.15	983.069	552.976	607.591	634.899	812.398	798.744	#REF!	0	34.1344	13.6537	34.1344	61.4418
	810	19900	48	6	Cingulate cortex area 24a' layer6a	A24a' (Cg2)-6a	A24a' (Cg2)	19900	0.14404	430.436	708.14	465.149	340.183	583.171	617.884	881.699	617.884	631.769	534.574	805.332	895.585	#REF!	6.9425	20.8275	41.6551	20.8275	111.08
	819	20000	48	6	Cingulate cortex area 24a' layer6b	A24a' (Cg2)-6b	A24a' (Cg2)	20000	0.03504	342.466	570.78	199.772	228.31	656.393	485.16	799.087	313.927	913.242	256.849	456.621	742.009	#REF!	0	0	142.694	171.233	57.0776
	972	20100	315	4	Cingulate cortex area 32 (Prelimbic cortex)	A32 (PrL)	Isocortex	20100	2.0478	55.6695	46.39	25.3931	33.6947	862.877	47.8562	36.6247	26.8581	24.4164	43.9496	40.5313	45.9029	#REF!	193.378	590.39	659.244	541.068	550.835
	171	20200	972	6	Cingulate cortex area 32 (Prelimbic cortex) layer1	A32 (PrL)-1	A32 (PrL)	20200	0.47712	10.4795	0	2.0959	0	385.647	0	2.0959	0	0	2.0959	0	2.0959	#REF!	184.44	318.578	360.496	287.139	270.372
	195	20300	972	6	Cingulate cortex area 32 (Prelimbic cortex) layer2	A32 (PrL)-2	A32 (PrL)	20300	0	#DIV/0!	#DIV/0!	#DIV/0!	#DIV/0!	#DIV/0!	#DIV/0!	#DIV/0!	#DIV/0!	#DIV/0!	#DIV/0!	#DIV/0!	#DIV/0!	#REF!	#DIV/0!	#DIV/0!	#DIV/0!	#DIV/0!	#DIV/0!
	304	20400	972	6	Cingulate cortex area 32 (Prelimbic cortex) layer2/3	A32 (PrL)-2/3	A32 (PrL)	20400	0.59568	20.145	11.75	0	16.7875	1109.66	6.715	30.2176	6.715	10.0725	21.8238	15.1088	5.0363	#REF!	315.606	847.771	1071.04	817.553	867.916
	363	20500	972	6	Cingulate cortex area 32 (Prelimbic cortex) layer5	A32 (PrL)-5	A32 (PrL)	20500	0.73804	23.034	24.39	16.2593	28.4537	924.069	56.9075	50.1328	28.4537	37.9383	60.9723	42.0031	46.068	#REF!	146.333	650.371	623.273	556.88	570.43
	84	20600	972	6	Cingulate cortex area 32 (Prelimbic cortex) layer6a	A32 (PrL)-6a	A32 (PrL)	20600	0.23696	337.61	295.41	164.585	160.365	1012.83	219.446	80.1823	126.604	67.5219	130.824	181.465	236.327	#REF!	50.6415	303.849	337.61	308.069	257.427
	132	20700	972	6	Cingulate cortex area 32 (Prelimbic cortex) layer6b	A32 (PrL)-6b	A32 (PrL)	20700	0	#DIV/0!	#DIV/0!	#DIV/0!	#DIV/0!	#DIV/0!	#DIV/0!	#DIV/0!	#DIV/0!	#DIV/0!	#DIV/0!	#DIV/0!	#DIV/0!	#REF!	#DIV/0!	#DIV/0!	#DIV/0!	#DIV/0!	#DIV/0!
	714	20800	315	4	Orbital cortex	O	Isocortex	20800	5.50052	125.443	167.08	158.894	66.9028	984.271	48.5409	118.716	21.8161	60.7215	49.2681	62.7213	64.7212	#REF!	166.893	316.515	345.422	207.071	389.054
	723	21400	714	4	Lateral orbital cortex	LO	O	21400	2.81524	121.837	205.67	211.35	65.0033	774.357	43.3356	164.107	15.6292	82.0534	45.4668	72.4627	67.1346	#REF!	62.5169	157.003	185.419	86.3159	218.454
	448	21500	723	6	Lateral orbital cortex layer1	LO-1	LO	21500	0.66592	190.714	249.28	288.323	100.613	707.292	48.0538	169.69	22.5252	93.1043	76.5858	126.141	120.135	#REF!	159.178	324.363	319.858	132.148	360.404
	412	21600	723	6	Lateral orbital cortex layer2/3	LO-2/3	LO	21600	1.2422	113.508	202.06	210.916	61.1818	945.097	55.5466	153.76	9.6603	79.6973	34.616	82.1124	61.9868	#REF!	47.4964	132.024	189.18	78.0873	177.91
	630	21700	723	6	Lateral orbital cortex layer5	LO-5	LO	21700	0.76848	76.7749	182.18	161.357	46.8457	628.513	23.4229	193.889	16.9165	78.0762	29.9292	19.5191	35.1343	#REF!	5.2051	50.7495	57.2559	57.2559	158.755
	440	21800	723	6	Lateral orbital cortex layer6a	LO-6a	LO	21800	0.09136	175.131	240.81	186.077	43.7828	536.34	32.8371	98.5114	43.7828	109.457	120.403	32.8371	54.7285	#REF!	10.9457	54.7285	43.7828	43.7828	207.969
	488	21900	723	6	Lateral orbital cortex layer6b	LO-6b	LO	21900	0	#DIV/0!	#DIV/0!	#DIV/0!	#DIV/0!	#DIV/0!	#DIV/0!	#DIV/0!	#DIV/0!	#DIV/0!	#DIV/0!	#DIV/0!	#DIV/0!	#REF!	#DIV/0!	#DIV/0!	#DIV/0!	#DIV/0!	#DIV/0!
	731	22000	714	4	Medial orbital cortex	MO	ORB	22000	1.42692	67.9786	49.76	40.647	32.2373	930.676	42.7494	46.2535	24.5284	25.2292	56.7656	28.7332	28.0324	#REF!	340.594	492.67	513.694	366.524	510.19
	484	22100	731	6	Medial orbital cortex layer1	MO-1	ORBm	22100	0.4622	71.3977	41.11	21.6357	30.2899	638.252	34.617	64.907	36.7806	23.7992	62.7434	41.1077	15.145	#REF!	607.962	426.222	495.457	367.806	430.55
	524	22200	731	6	Medial orbital cortex layer2/3	MO-2/3	ORBm	22200	0	#DIV/0!	#DIV/0!	#DIV/0!	#DIV/0!	#DIV/0!	#DIV/0!	#DIV/0!	#DIV/0!	#DIV/0!	#DIV/0!	#DIV/0!	#DIV/0!	#REF!	#DIV/0!	#DIV/0!	#DIV/0!	#DIV/0!	#DIV/0!
	582	22300	731	6	Medial orbital cortex layer5	MO-5	ORBm	22300	0.56028	26.7723	10.71	12.4938	5.3545	1136.93	10.7089	26.7723	12.4938	19.633	39.2661	16.0634	7.1393	#REF!	287.356	622.903	613.979	437.281	712.144
	620	22400	731	6	Medial orbital cortex layer6a	MO-6a	ORBm	22400	0.36364	134.749	126.5	112.749	79.7492	1042.24	107.249	57.7494	30.2497	38.4996	79.7492	35.7496	76.9992	#REF!	96.249	412.496	384.996	274.997	351.997
	910	22500	731	6	Medial orbital cortex layer6b	MO-6b	ORBm	22500	0.00936	0	0	0	0	1816.24	0	0	0	0	106.838	0	106.838	#REF!	0	0	106.838	106.838	106.838
	738	22600	714	4	Ventral orbital cortex	VO	O	22600	1.25836	198.671	213.77	175.625	110.461	1514.67	66.7536	99.3356	32.5821	53.2439	49.2705	79.4685	100.925	#REF!	203.439	473.632	512.572	296.418	633.364
	2320	22610	738	6	Orbital cortex ventral part layer 1	VO-1	VO	22610	0.3868	160.29	183.56	201.655	98.242	1300.41	33.6091	118.924	31.0238	25.8532	33.6091	56.8769	43.9504	#REF!	413.651	811.789	659.255	542.916	842.813
	2321	22620	738	6	Orbital cortex ventral part layer 2/3	VO-2/3	VO	22620	0.59832	183.848	230.65	168.806	108.638	1678.03	83.5673	111.98	26.7415	40.1123	35.0983	93.5954	125.351	#REF!	152.093	404.466	538.174	205.576	665.196
	2322	22630	738	6	Orbital cortex ventral part layer 5	VO-5	VO	22630	0.18064	315.545	204.83	155.004	105.182	1821.3	94.1098	55.3587	27.6794	110.717	116.253	88.574	143.933	#REF!	5.5359	171.612	249.114	127.325	260.186
	2323	22640	738	6	Orbital cortex ventral part layer 6a	VO-6a	VO	22640	0.05272	246.586	246.59	94.8407	170.713	1213.96	37.9363	37.9363	132.777	208.649	75.8725	94.8407	132.777	#REF!	0	37.9363	56.9044	75.8725	132.777
	2324	22650	738	6	Orbital cortex ventral part layer 6b	VO-6b	VO	22650	0.00744	1075.27	1344.09	1209.68	1075.27	537.634	268.817	0	134.409	268.817	403.226	134.409	268.817	#REF!	0	0	268.817	0	403.226
	95	23300	315	4	Agranular insular cortex	AI	Isocortex	23300	5.675	100.088	269.6	446.344	65.022	494.978	40.3524	58.6784	29.6035	38.9427	43.7004	86.3436	77.7093	#REF!	251.278	395.947	361.057	313.304	383.436
	2331	23310	95	6	Agranular insular cortex layer 1	AI1	AI	23310	0.04744	21.0793	400.51	210.793	84.317	400.506	147.555	21.0793	21.0793	0	0	21.0793	0	#REF!	779.933	526.981	737.774	316.189	189.713
	2332	23320	95	6	Agranular insular cortex layer 2/3	AI2/3	AI	23320	0.06864	29.1375	43.71	145.688	58.2751	43.7063	14.5688	58.2751	0	14.5688	14.5688	14.5688	14.5688	#REF!	0	43.7063	72.8438	43.7063	14.5688
	2333	23330	95	6	Agranular insular cortex layer 5	AI5	AI	23330	0.04924	0	0	101.543	0	142.161	0	243.704	0	0	81.2348	20.3087	0	#REF!	0	0	20.3087	60.9261	81.2348
	104	23400	95	4	Agranular insular cortex dorsal part	AID	AI	23400	2.71268	43.8681	92.9	231.137	42.7621	340.991	42.0249	82.9438	25.4361	38.3385	36.8639	30.597	38.3385	#REF!	161.095	254.361	236.666	206.069	223.764
	996	23500	104	6	Agranular insular cortex dorsal part layer1	AID-1	AID	23500	0.37372	45.4886	163.22	350.53	29.4338	588.676	16.0548	21.4064	10.7032	16.0548	45.4886	21.4064	34.7854	#REF!	628.813	404.046	414.749	275.607	422.776
	328	23600	104	6	Agranular insular cortex dorsal part layer2/3	AID-2/3	AID	23600	0.7782	28.2704	113.08	283.989	26.9854	101.516	24.4153	17.9902	14.1352	16.7052	21.8453	39.8355	30.8404	#REF!	25.7003	123.362	120.792	127.217	88.6662
	1101	23700	104	6	Agranular insular cortex dorsal part layer5	AID-5	AID	23700	0.58696	32.3702	69.85	250.443	11.9259	308.368	23.8517	34.0739	27.2591	15.3332	37.4813	25.5554	40.8886	#REF!	45.9997	226.591	165.258	197.629	229.999
	783	23800	104	6	Agranular insular cortex dorsal part layer6a	AID-6a	AID	23800	0.23048	30.3714	34.71	182.228	8.6775	1318.99	8.6775	26.0326	21.6939	21.6939	8.6775	13.0163	26.0326	#REF!	203.922	559.702	637.799	711.558	767.962
	831	23900	104	6	Agranular insular cortex dorsal part layer6b	AID-6b	AID	23900	0.00096	1041.67	0	0	0	1041.67	0	0	0	0	0	0	0	#REF!	0	0	0	0	0
need to check, could be level 5?	2020	23910	104	4	Dorsolateral orbital cortex	DLO	AID	23910	0.74236	71.3939	72.74	115.847	101.029	188.588	98.335	238.429	44.4528	95.6409	56.5763	35.0234	49.841	#REF!	145.482	243.817	200.711	103.723	91.5998
	2326	23920	2020	6	Dorsolateral orbital cortex layer 1	DLO-1	DLO	23920	0.23424	81.1134	81.11	157.958	110.997	371.414	110.997	226.264	55.4986	140.881	93.9208	29.8839	76.8443	#REF!	397.029	700.137	584.87	264.686	213.456
	2327	23930	2020	6	Dorsolateral orbital cortex layer 2/3	DLO-2/3	DLO	23930	0.3672	65.3595	78.98	111.656	81.6993	84.4227	111.656	269.608	29.9564	68.0828	32.6797	38.1264	32.6797	#REF!	40.8497	40.8497	29.9564	35.4031	19.0632
	2328	23940	2020	6	Dorsolateral orbital cortex layer 5	DLO-5	DLO	23940	0.14092	70.9622	42.58	56.7698	134.828	156.117	42.5773	177.406	63.866	92.2509	56.7698	35.4811	49.6736	#REF!	0	14.1924	7.0962	14.1924	78.0585
	2329	23950	2020	6	Dorsolateral orbital cortex layer 6a	DLO-6a	DLO	23950	0	#DIV/0!	#DIV/0!	#DIV/0!	#DIV/0!	#DIV/0!	#DIV/0!	#DIV/0!	#DIV/0!	#DIV/0!	#DIV/0!	#DIV/0!	#DIV/0!	#REF!	#DIV/0!	#DIV/0!	#DIV/0!	#DIV/0!	#DIV/0!
	2330	23960	2020	6	Dorsolateral orbital cortex layer 6b	DLO-6b	DLO	23960	0	#DIV/0!	#DIV/0!	#DIV/0!	#DIV/0!	#DIV/0!	#DIV/0!	#DIV/0!	#DIV/0!	#DIV/0!	#DIV/0!	#DIV/0!	#DIV/0!	#REF!	#DIV/0!	#DIV/0!	#DIV/0!	#DIV/0!	#DIV/0!
	111	24000	95	4	Agranular insular cortex posterior part	AIP	AI	24000	1.19016	207.535	587.32	908.281	152.08	604.961	23.5262	20.1654	31.0883	24.3665	41.1709	141.157	88.2234	#REF!	439.437	541.944	577.233	515.897	715.87
	120	24100	111	6	Agranular insular cortex posterior part layer1	AIP-1	AIP	24100	0.26968	463.512	1123.55	1079.06	426.431	259.567	18.5405	40.7891	29.6648	29.6648	85.2863	192.821	126.075	#REF!	537.674	415.307	419.015	508.01	541.382
	163	24200	111	6	Agranular insular cortex posterior part layer2/3	AIP-2/3	AIP	24200	0.56632	183.642	603.9	983.543	109.479	693.954	24.721	19.4236	40.6131	33.5499	40.6131	160.686	82.9919	#REF!	432.618	688.657	633.917	550.925	840.514
	344	24300	111	6	Agranular insular cortex posterior part layer5	AIP-5	AIP	24300	0.23924	58.5186	200.64	790.002	16.7196	572.647	37.6191	4.1799	20.8995	4.1799	12.5397	83.5981	87.778	#REF!	334.392	367.832	581.006	363.652	576.827
	314	24400	111	6	Agranular insular cortex posterior part layer6a	AIP-6a	AIP	24400	0.11492	34.8068	52.21	382.875	0	1044.2	0	8.7017	8.7017	8.7017	0	43.5085	26.1051	#REF!	461.19	478.594	661.33	678.733	800.557
	355	24500	111	6	Agranular insular cortex posterior part layer6b	AIP-6b	AIP	24500	0	#DIV/0!	#DIV/0!	#DIV/0!	#DIV/0!	#DIV/0!	#DIV/0!	#DIV/0!	#DIV/0!	#DIV/0!	#DIV/0!	#DIV/0!	#DIV/0!	#REF!	#DIV/0!	#DIV/0!	#DIV/0!	#DIV/0!	#DIV/0!
	119	24600	95	4	Agranular insular cortex ventral part	AIV	AI	24600	1.60684	123.846	346.64	497.872	39.8297	706.355	49.1648	41.6967	37.9627	54.1435	58.4999	146.872	143.76	#REF!	266.984	550.148	422.568	363.446	437.505
	704	24700	119	6	Agranular insular cortex ventral part layer1	AIV-1	AIV	24700	0.32496	240.03	529.3	713.934	64.6233	569.301	52.3141	49.2368	43.0822	113.86	138.479	169.252	169.252	#REF!	646.233	538.528	461.595	409.281	483.136
	694	24800	119	6	Agranular insular cortex ventral part layer2/3	AIV-2/3	AIV	24800	0.55608	152.856	381.24	597.036	39.5627	584.448	62.9406	44.9576	52.1508	66.5372	59.344	136.671	136.671	#REF!	179.83	539.491	377.644	323.694	374.047
	800	24900	119	6	Agranular insular cortex ventral part layer5	AIV-5	AIV	24900	0.5312	62.1235	301.2	393.449	28.238	713.479	41.4157	45.1807	32.003	18.8253	20.7078	154.368	160.015	#REF!	160.015	544.051	402.861	274.849	425.452
	675	25000	119	6	Agranular insular cortex ventral part layer6a	AIV-6a	AIV	25000	0.1946	15.4162	66.8	138.746	30.8325	1264.13	25.6937	10.2775	5.1387	15.4162	25.6937	118.191	77.0812	#REF!	174.717	616.649	539.568	642.343	575.54
	699	25100	119	6	Agranular insular cortex ventral part layer6b	AIV-6b	AIV	25100	0	#DIV/0!	#DIV/0!	#DIV/0!	#DIV/0!	#DIV/0!	#DIV/0!	#DIV/0!	#DIV/0!	#DIV/0!	#DIV/0!	#DIV/0!	#DIV/0!	#REF!	#DIV/0!	#DIV/0!	#DIV/0!	#DIV/0!	#DIV/0!
	254	25200	315	4	Cingulate cortex area 29 and 30 (retrosplenial cortex)	A29-30 (RS)	Isocortex	25200	7.40056	85.6692	90.53	71.2108	85.1287	1754.73	214.849	258.764	114.721	145.935	218.092	168.095	132.558	#REF!	101.073	91.2093	199.579	115.261	407.942
	879	25900	254	4	Cingulate cortex area 30 (Retrosplenial dysgranular cortex)	A30 (RSD)	RS	25900	3.53336	31.9809	38.21	42.4525	32.8299	1980.55	64.8108	118.018	33.396	56.0373	68.49	65.6599	50.66	#REF!	168.112	147.735	241.696	141.791	407.544
	442	26000	879	6	Cingulate cortex area 30 (Retrosplenial dysgranular cortex) layer1	A30 (RSD)-1	A30 (RSD)	26000	0.76316	32.7585	34.07	41.9309	11.7931	1544.89	56.3447	96.9652	22.2758	57.655	52.4136	52.4136	35.3792	#REF!	697.101	487.447	555.585	293.516	470.413
	434	26100	879	6	Cingulate cortex area 30 (Retrosplenial dysgranular cortex) layer2/3	A30 (RSD)-2/3	A30 (RSD)	26100	1.02208	15.6544	34.24	24.4599	11.7408	2411.75	37.1791	76.315	29.3519	36.2007	44.0279	37.1791	35.2223	#REF!	32.2871	75.3366	169.263	101.753	374.726
	545	26200	879	6	Cingulate cortex area 30 (Retrosplenial dysgranular cortex) layer4	A30 (RSD)-4	A30 (RSD)	26200	0.00128	0	0	0	0	3125	0	0	0	0	0	0	0	#REF!	0	0	0	0	781.25
	610	26300	879	6	Cingulate cortex area 30 (Retrosplenial dysgranular cortex) layer5	A30 (RSD)-5	A30 (RSD)	26300	0.9444	28.5896	33.88	48.7082	37.0606	1813.85	76.2389	123.888	29.6485	64.5913	73.0623	75.18	59.2969	#REF!	12.7065	31.7662	124.947	75.18	304.955
	274	26400	879	6	Cingulate cortex area 30 (Retrosplenial dysgranular cortex) layer6a	A30 (RSD)-6a	A30 (RSD)	26400	0.68404	40.9333	46.78	57.0142	58.4761	2056.9	89.1761	162.271	49.7047	61.3999	97.9475	108.181	71.6332	#REF!	20.4666	57.0142	182.738	130.109	505.818
	330	26500	879	6	Cingulate cortex area 30 (Retrosplenial dysgranular cortex) layer6b	A30 (RSD)-6b	A30 (RSD)	26500	0.1184	143.581	84.46	67.5676	168.919	1942.57	126.689	312.5	76.0135	118.243	177.365	76.0135	92.9054	#REF!	25.3378	33.7838	118.243	109.797	532.095
	886	26600	254	4	Cingulate cortex area 29 (Retrosplenial granular cortex)	A29 (RSG)	RS	26600	3.8672	134.723	138.34	97.4866	132.913	1548.41	351.934	387.36	189.026	228.072	354.779	261.688	207.385	#REF!	39.8221	39.5635	161.099	91.0219	408.306
	2132	26610	886	5	Cingulate cortex area 29c (Retrosplenial granular cortex c)	A29c (RSGc)	A29 (RSG)	26610	2.37024	122.772	108.01	47.2526	99.568	1676.62	233.31	245.123	151.462	133.742	257.78	172.135	159.899	#REF!	40.5022	29.5329	125.304	86.0672	255.248
	542	26700	2132	6	Cingulate cortex area 29c (Retrosplenial granular cortex c) layer1	A29c (RSGc)-1	A29c (RSGc)	26700	0.52824	83.2955	47.33	30.2893	85.1886	1177.5	119.264	176.056	71.937	68.1508	210.132	88.9747	106.012	#REF!	143.874	77.6162	193.094	200.666	318.037
	606	26800	2132	6	Cingulate cortex area 29c (Retrosplenial granular cortex c) layer2	A29c (RSGc)-2	A29c (RSGc)	26800	0	#DIV/0!	#DIV/0!	#DIV/0!	#DIV/0!	#DIV/0!	#DIV/0!	#DIV/0!	#DIV/0!	#DIV/0!	#DIV/0!	#DIV/0!	#DIV/0!	#REF!	#DIV/0!	#DIV/0!	#DIV/0!	#DIV/0!	#DIV/0!
	430	26900	2132	6	Cingulate cortex area 29c (Retrosplenial granular cortex c) layer2/3	A29c (RSGc)-2/3	A29c (RSGc)	26900	0.91332	114.965	74.45	37.2268	77.7384	1892	192.703	194.893	140.148	117.155	245.259	135.768	141.243	#REF!	17.5185	14.2338	152.192	71.1689	298.909
	687	27000	2132	6	Cingulate cortex area 29c (Retrosplenial granular cortex c) layer5	A29c (RSGc)-5	A29c (RSGc)	27000	0.53792	128.272	109.68	52.0523	100.387	2195.49	228.659	221.222	163.593	105.964	228.659	161.734	141.285	#REF!	3.718	20.4491	83.6556	40.8983	223.082
	590	27100	2132	6	Cingulate cortex area 29c (Retrosplenial granular cortex c) layer6a	A29c (RSGc)-6a	A29c (RSGc)	27100	0.3326	183.403	264.58	90.1984	165.364	1133.49	472.038	490.078	276.608	318.701	387.853	378.833	306.675	#REF!	6.0132	15.0331	30.0661	30.0661	105.231
	622	27200	2132	6	Cingulate cortex area 29c (Retrosplenial granular cortex c) layer6b	A29c (RSGc)-6b	A29c (RSGc)	27200	0.05816	206.327	275.1	68.7758	189.133	1134.8	584.594	481.43	223.521	189.133	412.655	412.655	275.103	#REF!	0	0	17.1939	17.1939	154.745
	2066	27210	886	5	Cingulate cortex area 29b (Retrosplenial granular cortex b)	A29b (RSGb)	A29 (RSG)	27210	0.73244	76.4568	137.9	131.069	141.991	1343.45	402.763	524.275	148.818	252.58	372.727	283.982	245.754	#REF!	54.612	39.5937	225.274	92.8404	551.581
	2416	27220	2066	6	Cingulate cortex area 29b (Retrosplenial granular cortex b) layer1	A29b (RSGb)-1	A29b (RSGb)	27220	0.21096	66.3633	90.06	90.0645	109.025	1061.81	445.582	445.582	137.467	227.531	303.375	317.596	265.453	#REF!	151.688	94.8047	383.959	142.207	990.709
	2417	27230	2066	6	Cingulate cortex area 29b (Retrosplenial granular cortex b) layer2/3	A29b (RSGb)-2/3	A29b (RSGb)	27230	0.21432	65.3229	158.64	83.9866	107.316	1535.09	438.596	592.572	130.646	223.964	354.61	223.964	223.964	#REF!	13.9978	23.3296	186.637	9.3318	270.623
	2418	27240	2066	6	Cingulate cortex area 29b (Retrosplenial granular cortex b) layer5	A29b (RSGb)-5	A29b (RSGb)	27240	0.23952	100.2	137.78	146.126	162.826	1373.58	354.876	542.752	146.126	283.901	442.552	279.726	258.851	#REF!	8.35	8.35	137.776	104.375	430.027
	2419	27250	2066	6	Cingulate cortex area 29b (Retrosplenial granular cortex b) layer6a	A29b (RSGb)-6a	A29b (RSGb)	27250	0.054	55.5556	203.7	407.407	277.778	1425.93	370.37	518.519	277.778	296.296	333.333	388.889	222.222	#REF!	55.5556	18.5185	129.63	185.185	462.963
	2420	27260	2066	6	Cingulate cortex area 29b (Retrosplenial granular cortex b) layer6b	A29b (RSGb)-6b	A29b (RSGb)	27260	0.01364	73.3138	293.26	146.628	293.255	1832.84	146.628	366.569	146.628	366.569	659.824	366.569	146.628	#REF!	0	73.3138	293.255	73.3138	659.824
	2067	27270	886	5	Cingulate cortex area 29a (Retrosplenial granular cortex a)	A29a (RSGa)	A29 (RSG)	27270	0.76452	227.594	232.83	221.054	227.594	1347.25	671.009	697.169	344.007	497.044	638.309	517.972	317.846	#REF!	23.5442	70.6326	210.59	104.641	745.566
	2421	27280	2067	6	Cingulate cortex area 29a (Retrosplenial granular cortex a) layer1	A29a (RSGa)-1	A29a (RSGa)	27280	0.14972	307.24	267.17	153.62	300.561	781.459	601.122	634.518	293.882	367.352	634.518	487.577	360.673	#REF!	80.1496	126.904	313.919	287.203	1275.71
	2422	27290	2067	6	Cingulate cortex area 29a (Retrosplenial granular cortex a) layer2/3	A29a (RSGa)-2/3	A29a (RSGa)	27290	0.21636	337.401	291.18	226.474	272.694	1825.66	600.85	813.459	397.486	406.729	767.24	457.571	328.157	#REF!	23.1096	115.548	281.938	36.9754	656.314
	2423	27291	2067	6	Cingulate cortex area 29a (Retrosplenial granular cortex a) layer5	A29a (RSGa)-5	A29a (RSGa)	27291	0.3012	146.082	215.8	239.044	182.603	1447.54	773.572	680.611	358.566	587.649	630.81	600.93	292.165	#REF!	3.3201	33.2005	172.643	69.7211	650.73
	2424	27292	2067	6	Cingulate cortex area 29a (Retrosplenial granular cortex a) layer6a	A29a (RSGa)-6a	A29a (RSGa)	27292	0.06716	119.119	104.23	297.796	193.568	789.16	684.932	655.152	238.237	684.932	431.805	550.923	253.127	#REF!	0	0	14.8898	89.3389	387.135
	2425	27293	2067	6	Cingulate cortex area 29a (Retrosplenial granular cortex a) layer6b	A29a (RSGa)-6b	A29a (RSGa)	27293	0.03008	99.734	99.73	166.223	66.4894	964.096	465.425	432.181	299.202	465.425	265.957	199.468	432.181	#REF!	0	0	0	66.4894	498.67
	22	27300	315	4	parietal association cortex	PtA	Isocortex	27300	1.4418	54.7926	67.28	57.5669	83.9229	2484.39	111.666	104.037	59.6477	43.0018	120.683	108.892	65.8899	#REF!	265.64	304.481	386.323	317.659	613.122
	2056	27910	22	4	Medial parietal association cortex	MPtA	PtA	27910	0.59264	25.3105	27	20.2484	35.4347	2564.79	70.8693	65.8072	30.3726	37.122	92.8051	23.6231	45.5589	#REF!	244.668	305.413	416.779	318.912	690.132
	2381	27911	2056	6	Medial parietal association cortex layer 1	MPtA-1	MPtA	27911	0.08116	0	0	0	0	924.101	0	0	0	0	0	0	0	#REF!	1207.49	677.674	948.743	616.067	776.245
	2382	27912	2056	6	Medial parietal association cortex layer 2/3	MPtA-2	MPtA	27912	0.1588	0	0	0	0	3652.39	0	0	0	0	0	0	0	#REF!	239.295	528.967	591.939	434.509	818.64
	2383	27913	2056	6	Medial parietal association cortex layer 4	MPtA-4	MPtA	27913	0.04768	0	0	0	0	3125	0	0	0	0	0	0	0	#REF!	20.9732	398.49	314.597	356.544	566.275
	2384	27914	2056	6	Medial parietal association cortex layer 5	MPtA-5	MPtA	27914	0.14164	42.3609	21.18	7.0602	14.1203	2223.95	42.3609	21.1805	7.0602	14.1203	21.1805	14.1203	7.0602	#REF!	7.0602	56.4812	162.383	120.023	437.729
	2385	27915	2056	6	Medial parietal association cortex layer 6a	MPtA-6a	MPtA	27915	0.11296	53.1161	97.38	79.6742	115.085	2620.4	168.201	168.201	53.1161	88.5269	239.023	61.9688	115.085	#REF!	44.2635	115.085	256.728	274.433	796.742
	2386	27916	2056	6	Medial parietal association cortex layer 6b	MPtA-6b	MPtA	27916	0.0504	59.5238	39.68	39.6825	119.048	2083.33	337.302	337.302	218.254	198.413	496.032	99.2063	257.937	#REF!	39.6825	39.6825	178.571	99.2063	734.127
	2057	27920	22	4	Lateral parietal association cortex	LPtA	PtA	27920	0.6194	74.2654	69.42	66.1931	130.772	2105.26	129.157	122.699	77.4943	50.0484	127.543	142.073	82.3377	#REF!	287.375	232.483	324.508	288.989	421.375
	2387	27921	2057	6	Lateral parietal association cortex layer 1	LPtA-1	LPtA	27921	0.08708	0	0	0	0	677.538	0	0	0	0	0	0	0	#REF!	1469.91	608.636	654.571	769.407	436.38
	2388	27922	2057	6	Lateral parietal association cortex layer 2/3	LPtA-2/3	LPtA	27922	0.15676	0	0	0	0	2762.18	0	0	0	0	0	0	0	#REF!	191.375	440.163	363.613	478.438	542.23
	2389	27923	2057	6	Lateral parietal association cortex layer 4	LPtA-4	LPtA	27923	0.11572	25.9246	17.28	8.6415	8.6415	2989.98	34.5662	34.5662	0	34.5662	51.8493	8.6415	51.8493	#REF!	25.9246	86.4155	388.87	146.906	319.737
	2390	27924	2057	6	Lateral parietal association cortex layer 5	LPtA-5	LPtA	27924	0.1206	99.5025	132.67	49.7512	215.589	1749.59	116.086	174.129	82.9187	74.6269	215.589	199.005	74.6269	#REF!	41.4594	33.1675	66.335	24.8756	132.67
	2391	27925	2057	6	Lateral parietal association cortex layer 6a	LPtA-6a	LPtA	27925	0.1002	239.521	179.64	229.541	419.162	1986.03	518.962	429.142	299.401	119.76	389.222	538.922	249.501	#REF!	29.9401	49.9002	249.501	149.701	628.742
	2392	27926	2057	6	Lateral parietal association cortex layer 6b	LPtA-6b	LPtA	27926	0.03904	179.303	179.3	281.762	307.377	1434.43	256.147	204.918	204.918	153.689	204.918	230.533	281.762	#REF!	230.533	76.8443	230.533	51.2295	563.525
	2082	27940	22	4	parietal cortex posterior area dorsal part	PtPD	PtA	27940	0.04512	44.3262	132.98	132.979	44.3262	3102.84	243.794	132.979	44.3262	44.3262	177.305	155.142	155.142	#REF!	177.305	487.589	332.447	465.425	797.872
	2402	27941	2082	6	Parietal cortex posterior area dorsal part layer1	PtPD-1	PtPD	27941	0.00532	0	0	0	0	751.88	0	0	0	0	0	0	0	#REF!	939.85	939.85	563.91	2067.67	375.94
	2403	27942	2082	6	Parietal cortex posterior area dorsal part layer2/3	PtPD-2/3	PtPD	27942	0.01168	0	0	0	0	2397.26	0	0	0	0	0	0	0	#REF!	256.849	1113.01	342.466	513.699	856.164
	2404	27943	2082	6	Parietal cortex posterior area dorsal part layer4	PtPD-4	PtPD	27943	0.01116	89.6057	0	179.212	89.6057	3673.84	0	89.6057	0	0	0	0	179.212	#REF!	0	179.212	448.029	0	716.846
	2405	27944	2082	6	Parietal cortex posterior area dorsal part layer5	PtPD-5	PtPD	27944	0.00816	0	612.75	245.098	0	3921.57	1102.94	245.098	245.098	122.549	367.647	490.196	490.196	#REF!	0	0	122.549	122.549	735.294
	2406	27945	2082	6	Parietal cortex posterior area dorsal part layer6a	PtPD-6a	PtPD	27945	0.00628	159.236	0	318.471	159.236	4458.6	159.236	318.471	0	0	796.178	477.707	0	#REF!	0	318.471	318.471	0	1273.89
	2407	27946	2082	6	Parietal cortex posterior area dorsal part layer6b	PtPD-6b	PtPD	27946	0.00252	0	396.83	0	0	2777.78	396.825	396.825	0	396.825	0	0	396.825	#REF!	0	0	0	1190.48	793.651
	541	28000	315	4	Temporal association cortex	TeA	Isocortex	28000	3.28808	482.957	1581.77	615.253	332.109	1065.97	21.5931	51.7019	14.5982	28.8922	73.9033	119.219	64.1712	#REF!	548.344	815.978	1017.62	704.058	1350.33
	97	28100	541	6	Temporal association cortex layer1	TeA-1	TeA	28100	0.51104	710.316	1919.61	702.489	379.618	759.236	70.4446	86.0989	41.0927	60.6606	125.235	199.593	150.673	#REF!	696.619	628.131	725.971	577.254	686.835
	1127	28200	541	6	Temporal association cortex layer2/3	TeA-2/3	TeA	28200	0.76356	510.765	1836.14	645.66	361.465	643.04	18.3352	51.0765	13.0965	20.9545	61.5538	99.5338	57.6248	#REF!	540.887	700.665	950.809	620.776	1153.81
	234	28300	541	6	Temporal association cortex layer4	TeA-4	TeA	28300	0.53088	510.473	2088.98	661.166	299.503	761.001	9.4183	20.7203	7.5347	7.5347	54.6263	47.0916	22.604	#REF!	207.203	623.493	680.003	350.362	1118.9
	289	28400	541	6	Temporal association cortex layer5	TeA-5	TeA	28400	0.73872	465.67	1318.5	634.882	295.105	1549.98	9.4759	33.8423	6.7685	16.2443	52.794	62.2699	28.4276	#REF!	591.564	1150.64	1283.3	862.302	1692.12
	729	28500	541	6	Temporal association cortex layer6a	TeA-6a	TeA	28500	0.57072	350.435	1061.82	522.148	355.691	1606.74	10.513	73.5913	14.0174	45.5565	101.626	205.004	85.8565	#REF!	788.478	1002.24	1492.85	1117.89	1992.22
	786	28600	541	6	Temporal association cortex layer6b	TeA-6b	TeA	28600	0.15988	68.8016	738.05	312.735	212.66	963.222	18.7641	56.2922	0	12.5094	25.0188	137.603	31.2735	#REF!	193.895	419.064	519.139	519.139	1344.76
	922	28700	315	4	Perihinal cortex	PRh	Isocortex	28700	2.89612	181.277	872.55	397.774	230.308	571.109	5.1793	25.5514	15.1927	13.8116	54.5558	70.7844	32.8025	#REF!	533.818	661.23	561.786	464.069	825.242
	335	28800	922	6	Perihinal cortex layer6a	PRh-6a	PRh	28800	0.48196	39.4224	161.84	109.968	80.9196	734.501	4.1497	12.4492	6.2246	6.2246	35.2726	51.8715	31.1229	#REF!	771.848	767.699	790.522	628.683	1031.21
	368	28900	922	6	Perihinal cortex layer6b	PRh-6b	PRh	28900	0.09412	31.8742	138.12	138.121	53.1237	499.363	0	0	0	0	10.6247	31.8742	31.8742	#REF!	393.115	605.61	552.486	531.237	711.857
	2286	28930	22	4	Parietal cortex posterior area rostral part	PtPR	PtA	28930	0.18464	86.6551	173.31	129.983	92.0711	3347.05	151.646	157.062	97.487	37.9116	173.31	259.965	54.1594	#REF!	281.629	498.267	509.099	373.7	964.038
	2396	28931	2286	6	Parietal cortex posterior area rostral part layer1	PtPR-1	PtPR	28931	0.02376	0	0	0	0	1304.71	0	0	0	0	0	0	0	#REF!	1220.54	1220.54	799.663	462.963	968.014
	2397	28932	2286	6	Parietal cortex posterior area rostral part layer2/3	PtPR-2/3	PtPR	28932	0.0462	0	0	0	0	3333.33	0	0	21.645	0	0	0	0	#REF!	367.965	779.221	779.221	757.576	952.381
	2398	28933	2286	6	Parietal cortex posterior area rostral part layer4	PtPR-4	PtPR	28933	0.03912	102.249	102.25	153.374	127.812	4729.04	255.624	204.499	127.812	51.1247	255.624	153.374	76.6871	#REF!	51.1247	434.56	639.059	204.499	971.37
	2399	28934	2286	6	Parietal cortex posterior area rostral part layer5	PtPR-5	PtPR	28934	0.03636	192.519	495.05	192.519	275.027	2970.3	330.033	467.547	275.027	110.011	330.033	935.093	137.514	#REF!	55.0055	192.519	82.5083	137.514	797.58
	2400	28935	2286	6	Parietal cortex posterior area rostral part layer6a	PtPR-6a	PtPR	28935	0.02828	106.082	318.25	212.164	70.7214	3748.23	176.803	70.7214	70.7214	35.3607	282.885	247.525	35.3607	#REF!	35.3607	106.082	212.164	282.885	1060.82
	2401	28936	2286	6	Parietal cortex posterior area rostral part layer6b	PtPR-6b	PtPR	28936	0.01092	183.15	91.58	457.875	0	3113.55	91.5751	183.15	0	0	183.15	91.5751	91.5751	#REF!	91.5751	0	457.875	183.15	1282.05
	540	29000	922	6	Perihinal cortex layer1	PRh-1	PRh	29000	0.5498	360.131	1538.74	625.682	380.138	383.776	10.9131	38.1957	36.3769	21.8261	85.4856	127.319	49.1088	#REF!	394.689	509.276	380.138	363.769	485.631
	692	29100	922	6	Perihinal cortex layer5	PRh-5	PRh	29100	0.70676	100.458	560.3	273.077	186.768	500.877	4.2447	24.0534	5.6596	11.3193	33.9578	45.277	25.4683	#REF!	415.983	502.292	498.047	352.312	751.316
	888	29200	922	6	Perihinal cortex layer2/3	PRh-2/3	PRh	29200	1.03564	217.257	1112.36	519.486	259.743	652.736	2.8968	28.9676	16.415	16.415	65.6599	72.419	30.8988	#REF!	595.767	817.852	603.492	519.486	981.036
	895	29300	315	4	Ectorhinal cortex	Ect	Isocortex	29300	3.27728	247.156	980.39	395.755	195.894	850.4	20.1387	46.9902	14.6463	20.7489	47.9056	97.9471	53.7031	#REF!	659.999	810.123	912.647	736.281	1259.89
	836	29400	895	6	Ectorhinal cortex layer1	Ect-1	Ect	29400	0.52828	397.516	1552.21	478.913	257.439	437.268	17.0364	39.7516	3.7859	11.3576	35.9658	77.6104	66.2527	#REF!	552.737	528.129	564.095	545.165	524.343
	427	29500	895	6	Ectorhinal cortex layer2/3	Ect-2/3	Ect	29500	1.195	267.782	1290.38	528.87	205.021	654.393	9.205	23.431	12.5523	14.2259	42.6778	69.4561	56.0669	#REF!	554.812	808.368	814.226	655.23	1194.98
	988	29600	895	6	Ectorhinal cortex layer5	Ect-5	Ect	29600	0.71512	251.706	795.67	362.177	163.609	1103.31	5.5935	20.9755	6.9918	5.5935	32.1624	43.3494	18.1788	#REF!	745.33	1029.2	1190.01	857.199	1671.05
	977	29700	895	6	Ectorhinal cortex layer6a	Ect-6a	Ect	29700	0.53404	101.116	320.2	194.742	138.566	1434.35	3.745	31.8328	5.6176	20.5977	28.0878	78.6458	28.0878	#REF!	1063.59	1052.36	1269.57	1110.4	1838.81
	1045	29800	895	6	Ectorhinal cortex layer6b	Ect-6b	Ect	29800	0.13756	21.8087	196.28	101.774	94.5042	835.999	7.2696	36.3478	0	7.2696	21.8087	79.9651	7.2696	#REF!	436.173	574.295	915.964	734.225	1272.17
	698	29900	695	3	Olfactory areas	OLF	CTXpl	29900	37.2049	201.882	306.49	280.528	142.831	621.72	120.307	117.995	101.492	124.984	123.048	183.793	125.548	#REF!	375.354	522.351	504.799	492.892	592.476
	507	30000	698	4	Main olfactory bulb	MOB	OLF	30000	12.2392	33.9891	112.59	70.5928	52.4544	182.202	82.9303	55.3141	51.7191	61.1151	53.7617	68.7136	29.0869	#REF!	56.8665	144.372	133.342	171.008	259.658
6?	212	30100	507	4	Glomerular layer of the olfactory bulb	Gl	MOB	30100	2.89772	24.502	125.62	55.5609	46.5884	154.604	98.0081	65.2237	52.1099	60.0472	59.7021	75.2316	31.404	#REF!	59.7021	120.439	92.4865	168.408	189.804
6?	220	30200	507	4	Granule cell layer of the olfactory bulb	GrO	MOB	30200	3.39696	28.8493	95.67	54.7548	44.1571	269.947	68.5907	24.728	43.8627	48.5728	29.4381	50.0447	22.9617	#REF!	47.9841	158.966	163.676	162.793	279.367
6?	228	30300	507	4	Internal plxiform layer of the olfactory bulb	IPl	MOB	30300	0.863	26.6512	92.7	81.1124	47.5087	246.813	78.7949	40.5562	46.3499	48.6674	37.08	61.4137	26.6512	#REF!	103.129	234.067	213.21	254.925	444.959
6?	236	30400	507	4	Mitral cell layer of the olfactory bulb	Mi	MOB	30400	0.85452	66.7041	105.32	73.7256	55.0016	153.302	56.1719	72.5554	46.8099	60.8529	52.6611	53.8314	23.405	#REF!	63.1934	198.942	186.069	236.39	408.416
6?	244	30500	507	4	External plexiform layer of the olfactory bulb	EPl	MOB	30500	4.227	39.5079	122.78	90.8446	63.6385	123.255	90.3714	72.6283	59.8533	74.5209	72.8649	83.7473	34.0667	#REF!	51.3366	119.707	110.007	149.042	223.799
	151	30600	698	4	Accessory olfactory bulb	AOB	OLF	30600	0.56592	0	0	0	12.3692	293.328	38.8748	58.3121	12.3692	14.1363	12.3692	0	1.767	#REF!	33.5736	136.062	164.334	169.635	266.822
6?	188	30700	151	4	Glomerular layer of the accessory olfactory bulb	GlA	AOB	30700	0.14716	0	0	0	0	346.562	0	122.316	0	6.7953	0	0	0	#REF!	81.5439	251.427	156.292	428.106	448.491
6?	196	30800	151	4	Granule cell layer of the accessory olfactory bulb	GrA	AOB	30800	0.1306	0	0	0	53.5988	153.139	153.139	7.657	7.657	0	0	0	7.657	#REF!	0	15.3139	0	38.2848	61.2557
6?	204	30900	151	4	Mitral cell layer of the accessory olfactory bulb	MiA	AOB	30900	0.11844	0	0	0	0	253.293	16.8862	59.1017	42.2155	59.1017	59.1017	0	0	#REF!	16.8862	126.646	295.508	92.874	211.077
6?	2021	30910	151	4	External plexiform layer of the accessory olfactory b	EPIA	AOB	30910	0.16972	0	0	0	0	382.984	0	41.2444	5.8921	0	0	0	0	#REF!	29.4603	135.517	206.222	100.165	306.387
	159	31000	698	4	Anterior olfactory area	AO	OLF	31000	3.4196	339.806	489.53	373.728	199.439	738.39	214.06	207.334	107.03	215.815	252.369	300.912	241.549	#REF!	146.801	605.626	645.397	539.244	653.878
	167	31100	159	4	Anterior olfactory area dorsal part	AOD	AO	31100	0.34948	191.713	463.55	357.674	231.773	649.537	57.2279	203.159	45.7823	45.7823	71.5349	226.05	251.803	#REF!	40.0595	437.793	472.13	374.843	646.675
	175	31200	159	4	Anterior olfactory area external part	AOE	AO	31200	0.1708	29.274	181.5	117.096	52.6932	210.773	193.208	76.1124	117.096	158.08	93.6768	64.4028	52.6932	#REF!	46.8384	222.482	228.337	169.789	345.433
	160	31250	159	4	Anterior olfactory area outer layer	AOOL	AO	31250	1.03932	269.407	423.35	298.272	202.055	358.889	195.32	184.736	83.7086	227.071	178.001	272.293	249.201	#REF!	225.147	500.327	648.501	406.035	606.166
	183	31300	159	4	Anterior olfactory area lateral part	AOL	AO	31300	0.70944	283.322	575.1	436.964	139.547	752.706	156.461	145.185	40.8773	155.052	156.461	284.732	205.796	#REF!	43.6964	479.251	552.548	436.964	565.235
	191	31400	159	4	Anterior olfactory area medial part	AOM	AO	31400	0.60168	570.07	570.07	455.392	255.95	1053.72	255.95	265.922	214.4	314.12	538.492	400.545	299.162	#REF!	267.584	1088.62	957.319	910.783	865.909
	199	31500	159	4	Anterior olfactory area posteroventral part	AOP/AOV	AO	31500	0.48556	475.739	521.05	393.36	218.305	1289.23	368.647	275.97	142.104	271.851	348.052	378.944	259.494	#REF!	61.7843	706.401	687.866	768.185	755.828
	2318	31510	199	4	Anterior olfactory area ventral part	AOV	AOP/AOV	31510	0.1524	288.714	511.81	334.646	183.727	400.262	183.727	85.3018	183.727	177.165	255.905	242.782	131.234	#REF!	45.9318	557.743	583.99	446.194	590.551
	2319	31520	199	4	Anterior olfactory area posterior part	AOP	AOP/AOV	31520	0.33316	561.292	525.27	420.219	234.122	1695.88	453.236	363.189	123.064	315.164	390.203	441.229	318.165	#REF!	69.0359	774.403	735.382	915.476	831.432
	589	31800	698	4	Taenia tecta	TT	OLF	31800	1.8174	686.145	875.43	730.164	456.146	884.78	321.338	272.917	235.501	247.056	375.261	426.433	354.903	#REF!	482.558	774.733	707.054	568.945	602.509
	597	31900	589	4	Dorsal tenia tecta	DTT	TT	31900	0.08292	253.256	759.77	301.495	241.196	554.752	482.393	241.196	325.615	410.034	337.675	410.034	180.897	#REF!	771.828	976.845	566.811	470.333	795.948
	1034	32100	589	6	Dorsal tenia tecta layer 1	DTT1	DTT	32100	0.3466	753.029	1018.47	784.766	464.512	551.067	326.024	337.565	251.01	251.01	337.565	484.709	409.694	#REF!	709.752	617.426	478.938	484.709	551.067
	1042	32200	589	6	Dorsal tenia tecta layer 2	DTT2	DTT	32200	0.18372	849.118	1328.11	1055.95	446.331	718.485	255.824	163.292	250.381	212.28	446.331	413.673	413.673	#REF!	457.217	794.688	811.017	495.319	484.433
	1050	32300	589	6	Dorsal tenia tecta layer 3	DTT3	DTT	32300	0.45336	906.564	1226.4	992.589	628.639	1422.71	229.398	158.814	174.255	200.724	304.394	454.385	438.945	#REF!	608.788	1217.58	1133.76	882.301	974.943
	1059	32400	589	6	Dorsal tenia tecta layer 4	DTT4	DTT	32400	0.0778	321.337	668.38	398.458	295.63	694.087	257.069	205.655	282.776	295.63	359.897	231.363	321.337	#REF!	167.095	424.164	591.26	411.311	437.018
	605	32500	589	4	Ventral tenia tecta	VTT	TT	32500	0.01728	925.926	231.48	289.352	57.8704	115.741	173.611	462.963	405.093	578.704	231.482	231.482	57.8704	#REF!	173.611	173.611	405.093	289.352	57.8704
	1067	32700	589	6	Ventral tenia tecta layer 1	VTT1	VTT	32700	0.32632	701.765	661.93	628.218	524.025	668.056	487.252	419.833	352.415	309.512	456.607	478.058	373.866	#REF!	505.639	717.087	796.764	609.831	536.283
	1075	32800	589	6	Ventral tenia tecta layer 2	VTT2	VTT	32800	0.11536	407.42	320.74	398.752	286.061	1300.28	286.061	268.724	208.044	182.039	476.768	294.729	130.028	#REF!	147.365	537.448	286.061	442.094	364.078
	1082	32900	589	6	Ventral tenia tecta layer 3	VTT3	VTT	32900	0.21404	378.434	308.35	462.53	247.617	794.244	303.682	303.682	98.1125	200.897	378.434	369.09	233.601	#REF!	42.0482	387.778	294.337	228.929	256.961
	814	33000	698	4	Cingulate cortex area 25 (dorsal peduncular cortex)	A25 (DP)	OLF	33000	0.70756	760.36	1173.05	910.17	462.152	893.211	529.99	391.486	383.006	481.938	606.309	462.152	429.646	#REF!	295.381	535.644	498.898	395.726	487.591
	496	33100	814	6	Cingulate cortex area 25 (dorsal peduncular cortex) layer1	A25 (DP)-1	A25 (DP)	33100	0.14864	1029.33	1318.62	1224.43	645.856	248.924	719.86	531.486	632.4	780.409	894.779	733.315	659.311	#REF!	174.919	222.013	363.294	235.468	329.656
	535	33200	814	6	Cingulate cortex area 25 (dorsal peduncular cortex) layer2	A25 (DP)-2	A25 (DP)	33200	0	#DIV/0!	#DIV/0!	#DIV/0!	#DIV/0!	#DIV/0!	#DIV/0!	#DIV/0!	#DIV/0!	#DIV/0!	#DIV/0!	#DIV/0!	#DIV/0!	#REF!	#DIV/0!	#DIV/0!	#DIV/0!	#DIV/0!	#DIV/0!
	360	33300	814	6	Cingulate cortex area 25 (dorsal peduncular cortex) layer2/3	A25 (DP)-2/3	A25 (DP)	33300	0.15608	845.72	1307.02	1108.41	531.779	506.151	717.581	499.744	576.627	570.22	884.162	653.511	551	#REF!	506.151	698.36	518.965	595.848	608.662
	646	33400	814	6	Cingulate cortex area 25 (dorsal peduncular cortex) layer5	A25 (DP)-5	A25 (DP)	33400	0.30528	720.65	1153.04	773.061	399.633	1339.75	452.044	330.844	232.573	360.325	399.633	314.465	327.568	#REF!	314.465	632.207	576.52	386.53	517.558
	267	33500	814	6	Cingulate cortex area 25 (dorsal peduncular cortex) layer6a	A25 (DP)-6a	A25 (DP)	33500	0.09756	338.253	799.51	543.255	266.503	1096.76	184.502	194.752	164.002	266.503	369.004	205.002	205.002	#REF!	82.0008	451.005	430.504	348.503	440.754
not a real thing?	2019	33510	814	4	Dorsal transition zone	DTr	A25 (DP)	33510	0	#DIV/0!	#DIV/0!	#DIV/0!	#DIV/0!	#DIV/0!	#DIV/0!	#DIV/0!	#DIV/0!	#DIV/0!	#DIV/0!	#DIV/0!	#DIV/0!	#REF!	#DIV/0!	#DIV/0!	#DIV/0!	#DIV/0!	#DIV/0!
	961	33600	698	4	Piriform cortex	PIR	OLF	33600	13.1746	193.555	313.71	335.419	107.328	929.746	121.143	115.222	93.2858	139.435	128.278	199.096	146.191	#REF!	686.095	884.052	852.78	849.896	932.631
	276	33800	961	4	Piriform cortex 1	Pir1	PIR	33800	3.76928	194.467	366.12	383.628	111.958	518.667	176.161	133.447	76.1419	163.161	177.222	196.059	148.57	#REF!	687.664	564.299	522.381	586.584	655.298
	284	33900	961	4	Piriform cortex 2	Pir2	PIR	33900	2.18368	207.906	343	374.597	120.439	629.213	137.841	129.598	79.2241	159.822	153.411	217.981	170.355	#REF!	983.203	1201.18	1394.44	1641.72	1376.58
	291	34000	961	4	Piriform cortex 3	Pir3	PIR	34000	6.1752	199.832	309.46	317.399	110.928	1313.48	97.8106	108.499	88.2563	132.951	107.851	206.957	139.429	#REF!	614.393	1026.2	875.437	773.416	975.677
	2024	34010	961	4	Cortex-amygdala transition zone	CxA	PIR	34010	1.0464	123.28	88.88	186.353	42.0489	773.127	25.8028	59.2508	214.067	49.6942	20.0688	124.236	127.102	#REF!	483.563	535.168	778.861	597.286	751.147
	2303	34020	2024	6	Cortex-amygdala transition zone Layer1	CxA1	CxA	34020	0.31492	190.525	171.47	327.067	79.3852	743.046	41.2803	117.49	314.366	76.2098	25.4033	165.121	219.103	#REF!	479.487	282.611	508.065	469.961	600.152
	2304	34030	2024	6	Cortex-amygdala transition zone Layer2	CxA2	CxA	34030	0.19356	108.493	41.33	87.8281	20.6654	160.157	46.4972	82.6617	170.49	61.9963	51.6636	77.4954	165.323	#REF!	320.314	175.656	439.14	165.323	588.965
	2305	34040	2024	6	Cortex-amygdala transition zone Layer3	CxA3	CxA	34040	0.53792	89.2326	57.63	139.426	27.8852	1011.3	9.2951	16.7311	171.029	29.7442	5.577	117.118	59.4884	#REF!	544.691	812.389	1059.64	827.261	897.903
	619	34100	698	4	Nucleus of the lateral olfactory tract	LOT	OLF	34100	0.34776	247.297	207.04	278.928	117.897	1365.88	69.0131	109.271	132.275	71.8887	34.5066	238.67	209.915	#REF!	721.762	695.882	678.629	575.109	756.269
	260	34300	619	6	Nucleus of the lateral olfactory tract 1	LOT1	LOT	34300	0.11464	87.2296	122.12	165.736	78.5066	819.958	26.1689	17.4459	183.182	17.4459	0	174.459	104.675	#REF!	819.958	453.594	846.127	689.114	898.465
	268	34400	619	6	Nucleus of the lateral olfactory tract 2	LOT2	LOT	34400	0.08588	244.527	174.66	337.68	81.5091	1816.49	23.2883	58.2208	93.1532	81.5091	34.9325	116.442	128.086	#REF!	500.699	698.649	419.19	419.19	489.055
	1139	34500	619	6	Nucleus of the lateral olfactory tract 3	LOT3	LOT	34500	0.11588	371.074	293.41	327.925	207.111	1708.66	155.333	215.74	138.074	103.555	60.4073	362.444	371.074	#REF!	681.74	1018.29	707.629	578.184	655.851
	631	34600	698	4	cortical amygdaloid nucleus	CO	OLF	34600	3.45628	230.305	282.1	346.037	200.505	745.31	6.3652	91.4278	150.451	73.7787	15.6237	195.586	73.7787	#REF!	502.563	390.593	383.649	338.804	533.232
	639	34700	631	4	Anterior cortical amygdaloid nucleus	ACo	CO	34700	0.77648	100.453	124.92	243.406	83.7111	1214.45	11.5908	32.1966	206.058	38.6359	12.8786	177.725	42.4995	#REF!	766.279	573.099	606.584	555.069	659.386
	192	34800	639	6	Anterior cortical amygdaloid nucleus layer1	ACo-1	ACo	34800	0.25048	59.885	47.91	171.67	55.8927	1081.92	7.9847	39.9233	255.509	47.908	11.977	171.67	51.9004	#REF!	710.636	359.31	534.973	666.72	542.957
	200	34900	639	6	Anterior cortical amygdaloid nucleus layer2	ACo-2	ACo	34900	0.14536	34.3974	103.19	192.625	89.4331	908.09	34.3974	55.0358	309.576	75.6742	27.5179	185.746	55.0358	#REF!	323.335	412.768	639.791	282.058	529.719
	208	35000	639	6	Anterior cortical amygdaloid nucleus layer3	ACo-3	ACo	35000	0.38064	152.375	183.9	310.004	99.8319	1418.66	5.2543	18.3901	133.985	18.3901	7.8815	178.647	31.5259	#REF!	972.047	775.01	641.026	585.855	785.519
	647	35100	631	4	Posterior cortical amygdaloid area	PCO	CO	35100	2.6798	267.93	327.64	375.774	234.346	609.374	4.8511	108.59	134.338	83.9615	16.4191	200.761	82.842	#REF!	426.151	337.712	319.054	276.14	496.679
	655	35200	647	5	Posterolateral cortical amygdaloid area	PLCo	PCO	35200	1.29976	294.67	296.98	324.675	229.273	682.434	5.3856	150.797	222.349	124.638	18.4649	195.421	108.482	#REF!	396.996	333.908	306.21	333.908	523.173
	216	35500	655	6	Posterolateral cortical amygdaloid area 1	PLCo1	PLCo	35500	0.42236	125.485	213.09	215.456	113.647	696.089	4.7353	125.485	137.324	68.6618	21.3088	99.4412	35.5147	#REF!	599.015	340.941	407.236	492.471	591.912
	224	35600	655	6	Posterolateral cortical amygdaloid area 2	PLCo2	PLCo	35600	0.24436	200.524	225.08	257.816	188.247	470.617	4.0923	130.954	180.062	81.8465	8.1846	180.062	77.7541	#REF!	171.878	364.217	208.708	130.954	392.863
	232	35700	655	6	Posterolateral cortical amygdaloid area 3	PLCo3	PLCo	35700	0.63304	443.89	380.7	423.354	322.255	755.087	6.3187	175.344	295.4	178.504	20.5358	265.386	169.026	#REF!	349.109	317.515	276.444	306.458	527.613
	663	35800	647	5	Posteromedial cortical amygdaloid area	PMCo	PCO	35800	1.38004	242.747	356.51	423.901	239.124	540.564	4.3477	68.8386	51.4478	45.6509	14.4923	205.791	58.694	#REF!	453.61	341.295	331.15	221.733	471.726
	240	36100	663	6	Posteromedial cortical amygdaloid area 1	PMCo1	PMCo	36100	0.36064	74.8669	199.65	257.875	80.4126	862.356	2.7728	30.5013	24.9556	5.5457	5.5457	102.595	30.5013	#REF!	1067.55	432.564	443.656	454.747	585.071
	248	36200	663	6	Posteromedial cortical amygdaloid area 2	PMCo2	PMCo	36200	0.25852	189.54	251.43	371.345	108.309	274.64	3.8682	19.3409	15.4727	19.3409	7.7363	119.913	27.0772	#REF!	220.486	386.817	243.695	88.968	324.926
	256	36300	663	6	Posteromedial cortical amygdaloid area 3	PMCo3	PMCo	36300	0.62636	356.025	415.1	502.906	343.253	469.379	1.5965	95.7916	76.6332	68.6506	14.3687	242.672	75.0367	#REF!	202.759	273.006	295.357	119.739	455.01
	788	36400	698	4	Rostral amygdalopiriform area	RAPir	OLF	36400	0.684	235.38	209.06	285.088	228.07	476.608	17.5439	185.673	179.825	100.877	70.1754	292.398	140.351	#REF!	391.813	315.789	232.456	286.55	456.14
	408	36600	788	4	Rostral amygdalopiriform area 1	RAPir1	RAPir	36600	0.1978	91.001	111.22	257.836	80.8898	748.231	25.2781	146.613	141.557	80.8898	75.8342	217.391	65.723	#REF!	576.34	227.502	323.559	449.949	566.229
	416	36700	788	4	Rostral amygdalopiriform area 2	RAPir2	RAPir	36700	0.12224	212.696	171.79	286.322	171.793	204.516	16.3613	147.251	106.348	81.8063	65.445	261.78	98.1675	#REF!	212.696	212.696	188.155	229.058	229.058
	424	36800	788	4	Rostral amygdalopiriform area 3	RAPir3	RAPir	36800	0.36396	321.464	274.76	299.483	326.959	420.376	13.7378	219.804	225.299	118.145	68.6889	343.444	195.076	#REF!	351.687	398.395	197.824	217.057	472.579
	566	36900	698	4	Amygdalopiriform transition area	Apir	OLF	36900	0.71588	705.425	779.46	518.243	660.725	372.967	61.4628	229.089	176.007	192.77	122.926	331.061	223.501	#REF!	451.193	312.902	272.392	268.201	413.477
	1140	37100	566	6	Postpiriform transition area layers 1	APir1	Apir	37100	0.11028	544.07	743.56	589.409	408.052	643.816	18.1357	154.153	99.7461	126.95	81.6104	145.085	63.4748	#REF!	1124.41	380.849	444.324	389.917	553.138
	1141	37200	566	6	Postpiriform transition area layers 2	APir2	Apir	37200	0.06576	608.273	1064.48	577.859	532.238	91.2409	15.2068	304.136	106.448	136.861	60.8273	136.861	136.861	#REF!	152.068	425.791	91.2409	212.895	136.861
	1142	37300	566	6	Postpiriform transition area layers 3	APir3	Apir	37300	0.4718	835.1	790.59	515.049	803.307	349.724	86.9012	260.704	218.313	237.389	154.727	402.713	273.421	#REF!	326.409	247.986	192.878	233.15	411.191
things get wonky here, level 4 and 5 are similar to 3 and 4 above	1089	37400	695	3	Hippocampal formation	HPF	CTXpl	37400	42.0257	195.737	383.81	268.812	218.271	470.617	97.7736	179.2	103.675	106.245	191.597	252.346	167.065	#REF!	311.429	252.512	349.072	337.27	528.32
	1080	37500	1089	4	Hippocampal region	HIP	HPF	37500	23.4979	196.102	326.79	276.62	230.488	332.412	123.415	190.528	135.799	121.67	230.701	285.898	214.274	#REF!	172.015	168.1	279.259	270.322	415.484
	375	37600	1080	4	Ammon's horn	CA	HIP	37600	16.5203	197.999	326.87	297.453	228.568	356.592	117.25	180.324	131.293	124.15	233.41	275.964	201.752	#REF!	177.479	160.348	242.732	237.102	387.161
	382	37700	375	5	Field CA1 of the hippocampus	CA1	CA	37700	8.84636	244.62	374.84	321.94	294.358	373.374	155.77	242.925	146.727	156.562	311.541	340.027	239.308	#REF!	237.612	190.7	267.229	275.255	432.042
	391	37800	382	6	Field CA1 of the hippocampus- lacunosum moleculare layer of the hippocampus	CA1_LMol	CA1	37800	2.12292	179.941	292.52	245.888	244.004	87.6152	129.067	200.667	148.381	124.828	221.393	278.861	202.551	#REF!	71.1284	62.6496	125.77	115.878	335.858
	399	37900	382	6	Field CA1 of the hippocampus- oriens layer of the hippocampus	CA1_Or	CA1	37900	2.04284	325.038	493.92	402.381	327.975	738.188	203.149	313.289	150.77	198.253	406.297	381.821	295.667	#REF!	280.981	246.715	489.025	364.688	627.558
	407	38000	382	6	Field CA1 of the hippocampus- pyramidal layer of the hippocampus	CA1_Py	CA1	38000	0.91096	286.511	439.1	366.646	318.346	828.796	153.684	286.511	159.173	170.15	356.767	422.631	251.383	#REF!	793.668	503.864	744.27	725.608	758.54
	415	38100	382	6	Field CA1 of the hippocampus- radiatum layer of the hippocampus	CA1_Rad	CA1	38100	3.76964	227.343	341.15	310.375	298.702	226.547	145.637	218.058	140.597	148.555	300.029	331.862	226.547	#REF!	173.491	156.779	111.416	207.712	301.355
	423	38200	375	5	Field CA2 of the hippocampus	CA2	CA	38200	1.354	204.579	344.17	298.375	194.978	231.167	148.449	168.39	158.05	146.233	234.121	311.669	216.396	#REF!	84.195	77.548	169.867	134.417	245.938
	431	38300	423	6	Field CA2 of the hippocampus- lacunosum moleculare layer of the hippocampus	CA2_LMol	CA2	38300	0.35808	175.938	343.5	296.023	212.243	19.5487	100.536	134.048	114.5	153.597	251.34	228.999	189.902	#REF!	16.756	22.3414	50.2681	39.0974	198.28
	438	38400	423	6	Field CA2 of the hippocampus- oriens layer of the hippocampus	CA2_Or	CA2	38400	0.37412	251.256	350.16	291.35	229.873	379.557	163.049	171.068	136.32	101.572	168.395	379.557	221.854	#REF!	109.591	85.5341	184.433	109.591	277.986
	446	38500	423	6	Field CA2 of the hippocampus- pyramidal layer of the hippocampus	CA2_Py	CA2	38500	0.19168	198.247	318.24	365.192	166.945	631.26	166.945	172.162	198.247	156.511	318.239	297.371	203.464	#REF!	193.03	193.03	422.579	359.975	375.626
	454	38600	423	6	Field CA2 of the hippocampus- radiatum layer of the hippocampus	CA2_Rad	CA2	38600	0.43012	190.644	351.06	276.667	162.745	99.9721	167.395	192.969	195.294	174.37	239.468	327.815	239.468	#REF!	69.748	65.0981	144.146	134.846	199.944
	463	38700	375	5	Field CA3 of the hippocampus	CA3	CA	38700	6.31992	131.331	256.02	262.978	143.673	359.973	56.6463	95.2544	103.957	74.0516	123.894	178.642	146.046	#REF!	113.293	135.603	224.054	205.699	354.593
	471	38800	463	6	Field CA3 of the hippocampus- lacunosum moleculare layer of the hippocampus	CA3_LMol	CA3	38800	0.1986	95.6697	181.27	271.903	105.74	60.423	5.0352	40.282	35.2467	15.1057	55.3877	151.057	70.4935	#REF!	0	10.0705	45.3172	30.2115	161.128
	479	38900	463	6	Field CA3 of the hippocampus- stratum lucidum of the hippocampus	SLu	CA3	38900	0.379	97.6253	234.83	253.298	126.649	575.198	29.0237	63.3245	36.9393	42.2164	102.902	73.8786	121.372	#REF!	55.409	92.3483	163.588	218.997	303.43
	486	39000	463	6	Field CA3 of the hippocampus- oriens layer of the hippocampus	CA3_Or	CA3	39000	2.92116	146.859	272.84	280.368	150.625	287.557	70.8623	115.707	131.455	91.7444	128.716	222.857	166.715	#REF!	124.95	129.743	255.378	208.137	380.671
	495	39100	463	6	Field CA3 of the hippocampus- pyramidal layer of the hippocampus	CA3_Py	CA3	39100	1.36608	144.208	281.1	274.508	148.6	726.165	76.8623	110.535	139.084	92.2347	169.829	194.718	159.581	#REF!	205.698	267.92	369.671	352.102	575.369
	504	39200	463	6	Field CA3 of the hippocampus- radiatum layer of the hippocampus	CA3_Rad	CA3	39200	1.45508	101.713	214.42	218.545	134.701	146.384	23.3664	55.667	42.6093	37.7986	85.9059	105.836	108.585	#REF!	33.6751	51.5436	64.6013	83.8442	134.701
	726	39300	1080	4	Dentate gyrus	DG	HIP	39300	6.92332	188.927	320.66	225.759	233.559	274.868	133.462	210.448	141.406	111.796	217.815	304.478	241.647	#REF!	156.717	186.76	367.454	350.121	481.994
	10703	39400	726	6	Molecular layer of the dentate gyrus	MoDG	DG	39400	4.30776	182.461	302.48	222.157	240.496	195.693	141.605	231.211	162.265	115.605	216.122	306.192	253.96	#REF!	96.1056	156.23	302.942	230.514	415.065
	10704	39500	726	6	Polymorph layer of the dentate gyrus	PoDG	DG	39500	0.89792	169.28	318.51	206.032	151.461	485.567	82.4127	133.642	92.4359	93.5495	174.849	216.055	147.006	#REF!	298.468	246.124	319.628	351.924	642.596
	632	39600	726	6	Granule cell layer of the dentate gyrus	GrDG	DG	39600	1.5918	214.851	378.19	243.749	268.25	329.187	150.144	209.197	118.105	116.849	258.198	343.636	261.339	#REF!	192.235	217.364	550.32	642.04	544.666
	982	41000	1080	4	Fasciola cinereum	FC	HIP	41000	0.02612	191.424	344.56	229.709	38.2848	650.842	459.418	153.139	344.564	191.424	880.551	344.564	191.424	#REF!	459.418	229.709	267.994	421.133	1033.69
	19	41100	1080	4	Induseum griseum	IG	HIP	41100	0.0282	851.064	1773.05	602.837	780.142	0	957.447	1312.06	1205.67	1028.37	1205.67	1489.36	851.064	#REF!	460.993	70.922	35.461	0	106.383
	822	41200	1089	4	Retrohippocampal region	RHP	HPF	41200	18.5278	195.275	456.13	258.909	202.777	645.896	65.2534	164.834	62.9326	86.6807	142.003	209.793	107.191	#REF!	488.24	359.569	437.614	422.177	671.425
	909	41300	822	4	Entorhinal area	ENT	RHP	41300	10.6741	219.972	543.09	279.368	244.799	578.692	40.1908	134.25	47.5919	75.6974	110.361	188.213	91.4365	#REF!	622.255	464.771	471.703	480.885	723.528
	918	41350	909	5	Dorsolateral entorhinal cortex	DLEnt	ENT	41350	3.6304	193.367	720.86	333.848	254.242	670.174	26.1679	95.0309	35.5333	74.6474	125.606	108.252	57.5694	#REF!	594.149	558.616	466.891	458.352	788.343
	1121	41400	918	6	Dorsolateral entorhinal cortex layer 1	DLEnt1	DLEnt	41400	0.62872	217.903	1102.24	345.146	265.619	648.938	12.7243	41.3539	22.2675	30.2201	92.2509	120.88	49.3065	#REF!	601.221	483.522	259.257	349.917	473.979
	20	41500	918	6	Dorsolateral entorhinal cortex layer 2	DLEnt2	DLEnt	41500	0.52212	224.086	861.87	281.545	270.053	798.667	5.7458	99.594	40.2206	76.6107	95.7634	90.0176	34.4748	#REF!	513.292	388.8	448.173	409.868	591.818
	999	41600	918	6	Dorsolateral entorhinal cortex layer 2/3	DLEnt2/3	DLEnt	41600	0.42488	103.559	647.24	336.566	152.984	957.918	2.3536	7.0608	11.768	18.8288	49.4257	40.0113	11.768	#REF!	990.868	932.028	451.892	635.473	1094.43
	715	41700	918	6	Dorsolateral entorhinal cortex layer 2a	DLEnta	DLEnt	41700	0	#DIV/0!	#DIV/0!	#DIV/0!	#DIV/0!	#DIV/0!	#DIV/0!	#DIV/0!	#DIV/0!	#DIV/0!	#DIV/0!	#DIV/0!	#DIV/0!	#REF!	#DIV/0!	#DIV/0!	#DIV/0!	#DIV/0!	#DIV/0!
	764	41800	918	6	Dorsolateral entorhinal cortex layer 2b	DLEntb	DLEnt	41800	0	#DIV/0!	#DIV/0!	#DIV/0!	#DIV/0!	#DIV/0!	#DIV/0!	#DIV/0!	#DIV/0!	#DIV/0!	#DIV/0!	#DIV/0!	#DIV/0!	#REF!	#DIV/0!	#DIV/0!	#DIV/0!	#DIV/0!	#DIV/0!
	52	41900	918	6	Dorsolateral entorhinal cortex layer 3	DLEnt3	DLEnt	41900	0.71624	289.009	861.44	413.269	330.895	658.997	43.2816	134.033	62.8281	110.298	192.673	114.487	78.1861	#REF!	657.601	647.827	640.847	511.002	899.14
	92	42000	918	6	Dorsolateral entorhinal cortex layer 4	DLEnt4	DLEnt	42000	0	#DIV/0!	#DIV/0!	#DIV/0!	#DIV/0!	#DIV/0!	#DIV/0!	#DIV/0!	#DIV/0!	#DIV/0!	#DIV/0!	#DIV/0!	#DIV/0!	#REF!	#DIV/0!	#DIV/0!	#DIV/0!	#DIV/0!	#DIV/0!
	312	42100	918	6	Dorsolateral entorhinal cortex layer 4/5	DLEnt4/5	DLEnt	42100	0	#DIV/0!	#DIV/0!	#DIV/0!	#DIV/0!	#DIV/0!	#DIV/0!	#DIV/0!	#DIV/0!	#DIV/0!	#DIV/0!	#DIV/0!	#DIV/0!	#REF!	#DIV/0!	#DIV/0!	#DIV/0!	#DIV/0!	#DIV/0!
	139	42200	918	6	Dorsolateral entorhinal cortex layer 5	DLEnt5	DLEnt	42200	0.89132	179.509	449.89	309.653	243.459	477.943	32.536	132.388	40.3895	95.3642	152.583	125.656	63.9501	#REF!	535.161	503.747	509.357	446.529	918.862
	387	42300	918	6	Dorsolateral entorhinal cortex layer 5/6	DLEnt5/6	DLEnt	42300	0	#DIV/0!	#DIV/0!	#DIV/0!	#DIV/0!	#DIV/0!	#DIV/0!	#DIV/0!	#DIV/0!	#DIV/0!	#DIV/0!	#DIV/0!	#DIV/0!	#REF!	#DIV/0!	#DIV/0!	#DIV/0!	#DIV/0!	#DIV/0!
	28	42400	918	6	Dorsolateral entorhinal cortex layer 6a	DLEnt6a	DLEnt	42400	0.37576	71.8544	399.19	290.079	207.579	644.028	47.9029	114.435	13.3064	69.1931	103.79	122.419	79.8382	#REF!	351.288	494.997	489.674	468.384	758.463
	60	42500	918	6	Dorsolateral entorhinal cortex layer 6b	DLEnt6b	DLEnt	42500	0.0634	47.3186	441.64	347.003	205.047	567.823	78.8644	63.0915	15.7729	47.3186	78.8644	126.183	94.6372	#REF!	110.41	362.776	110.41	299.685	630.915
	926	42700	909	5	Dorsal intermediate entorhinal cortex	DIEnt	ENT	42700	1.41464	405.757	788.89	359.102	361.223	348.499	54.4308	110.275	63.6204	135.017	138.551	209.947	118.051	#REF!	566.222	326.585	208.534	324.464	528.049
	526	42800	926	6	Dorsal intermediate entorhinal cortex layer 1	DIEnt1	DIEnt	42800	0.22844	350.201	954.3	555.945	512.169	726.668	43.7752	87.5503	78.7953	118.193	179.478	166.346	96.3054	#REF!	1221.33	507.792	306.426	367.711	569.077
	543	42900	926	6	Dorsal intermediate entorhinal cortex layer 2	DIEnt2	DIEnt	42900	0.26944	430.523	794.24	356.295	456.502	192.993	18.557	63.0938	59.3824	70.5166	144.745	170.725	144.745	#REF!	360.006	345.16	233.818	419.388	504.751
	468	43000	926	6	Dorsal intermediate entorhinal cortex layer 2a	DIEnt2a	DIEnt	43000	0	#DIV/0!	#DIV/0!	#DIV/0!	#DIV/0!	#DIV/0!	#DIV/0!	#DIV/0!	#DIV/0!	#DIV/0!	#DIV/0!	#DIV/0!	#DIV/0!	#REF!	#DIV/0!	#DIV/0!	#DIV/0!	#DIV/0!	#DIV/0!
	508	43100	926	6	Dorsal intermediate entorhinal cortex layer 2b	DIEnt2b	DIEnt	43100	0	#DIV/0!	#DIV/0!	#DIV/0!	#DIV/0!	#DIV/0!	#DIV/0!	#DIV/0!	#DIV/0!	#DIV/0!	#DIV/0!	#DIV/0!	#DIV/0!	#REF!	#DIV/0!	#DIV/0!	#DIV/0!	#DIV/0!	#DIV/0!
	2408	43110	926	6	Dorsal intermediate entorhinal cortex layer 2/3	DIEnt2/3	DIEnt	43110	0	#DIV/0!	#DIV/0!	#DIV/0!	#DIV/0!	#DIV/0!	#DIV/0!	#DIV/0!	#DIV/0!	#DIV/0!	#DIV/0!	#DIV/0!	#DIV/0!	#REF!	#DIV/0!	#DIV/0!	#DIV/0!	#DIV/0!	#DIV/0!
	664	43200	926	6	Dorsal intermediate entorhinal cortex layer 3	DIEnt3	DIEnt	43200	0.42136	408.202	825.9	379.723	370.23	320.391	42.7188	104.424	54.5852	130.53	118.663	187.488	125.783	#REF!	723.847	377.349	168.502	301.405	548.225
	712	43300	926	6	Dorsal intermediate entorhinal cortex layer 4	DIEnt4	DIEnt	43300	0	#DIV/0!	#DIV/0!	#DIV/0!	#DIV/0!	#DIV/0!	#DIV/0!	#DIV/0!	#DIV/0!	#DIV/0!	#DIV/0!	#DIV/0!	#DIV/0!	#REF!	#DIV/0!	#DIV/0!	#DIV/0!	#DIV/0!	#DIV/0!
	727	43400	926	6	Dorsal intermediate entorhinal cortex layer 5	DIEnt5	DIEnt	43400	0.43092	464.123	744.92	273.833	255.268	243.665	83.5422	134.596	62.6566	157.802	102.107	245.985	97.4659	#REF!	227.42	162.443	136.916	262.23	494.291
	550	43500	926	6	Dorsal intermediate entorhinal cortex layer 5/6	DIEnt5/6	DIEnt	43500	0	#DIV/0!	#DIV/0!	#DIV/0!	#DIV/0!	#DIV/0!	#DIV/0!	#DIV/0!	#DIV/0!	#DIV/0!	#DIV/0!	#DIV/0!	#DIV/0!	#REF!	#DIV/0!	#DIV/0!	#DIV/0!	#DIV/0!	#DIV/0!
	743	43600	926	6	Dorsal intermediate entorhinal cortex layer 6	DIEnt6	DIEnt	43600	0.06448	93.0521	232.63	108.561	77.5434	542.804	124.07	263.648	93.0521	341.191	341.191	434.243	170.595	#REF!	341.191	372.208	496.278	341.191	573.821
	934	43700	909	5	Ventral intermediate entorhinal cortex	VIEnt	ENT	43700	0.9976	307.739	562.35	266.64	239.575	429.03	32.077	163.392	41.0986	79.1901	99.2382	293.705	165.397	#REF!	834.002	487.169	540.297	553.328	793.905
	259	43800	934	6	Ventral intermediate entorhinal cortex layer 1	VIEnt1	VIEnt	43800	0.21744	312.73	676.05	239.146	225.35	763.429	22.9948	156.365	55.1876	78.1825	105.776	225.35	197.756	#REF!	869.205	400.11	524.283	413.907	712.84
	324	43900	934	6	Ventral intermediate entorhinal cortex layer 2	VIEnt2	VIEnt	43900	0.22568	345.622	615.92	270.294	301.312	128.5	44.3105	146.225	22.1553	62.0347	110.776	261.432	177.242	#REF!	274.725	385.502	576.037	624.778	416.519
	371	44000	934	6	Ventral intermediate entorhinal cortex layer 3	VIEnt3	VIEnt	44000	0.24388	360.833	602.76	282.926	282.926	295.227	32.803	172.216	28.7026	94.3087	86.1079	352.632	164.015	#REF!	1595.05	684.763	311.629	590.454	963.589
	419	44100	934	6	Ventral intermediate entorhinal cortex layer 4	VIEnt4	VIEnt	44100	0	#DIV/0!	#DIV/0!	#DIV/0!	#DIV/0!	#DIV/0!	#DIV/0!	#DIV/0!	#DIV/0!	#DIV/0!	#DIV/0!	#DIV/0!	#DIV/0!	#REF!	#DIV/0!	#DIV/0!	#DIV/0!	#DIV/0!	#DIV/0!
	1133	44200	934	6	Ventral intermediate entorhinal cortex layer 5/6	VIEnt5/6	VIEnt	44200	0.3106	235.029	412.11	270.444	170.637	518.352	28.9762	173.857	54.7328	80.4894	96.5873	318.738	135.222	#REF!	618.158	466.838	705.087	569.865	991.629
	2159	44220	909	5	Medial entorhinal cortex	MEnt	ENT	44220	1.43856	101.49	304.47	182.127	125.82	725.031	63.2577	175.87	64.648	79.2459	132.077	238.433	86.8924	#REF!	1083.03	741.019	836.948	930.097	1121.96
	2164	44230	2159	6	Medial entorhinal cortex layer 1	MEnt1	MEnt	44230	0.12176	180.683	410.64	172.47	205.322	279.238	32.8515	221.748	73.9159	139.619	188.896	221.748	57.4901	#REF!	862.352	599.54	714.52	377.792	730.946
	2444	44240	2159	6	Medial entorhinal cortex layer 2	MEnt2	MEnt	44240	0.15692	76.4721	337.75	114.708	127.454	771.094	146.571	229.416	63.7267	89.2174	108.335	254.907	76.4721	#REF!	955.901	509.814	892.174	720.112	681.876
	2445	44250	2159	6	Medial entorhinal cortex layer 3	MEnt3	MEnt	44250	0.30988	138.763	313.02	206.532	212.986	922.938	90.3576	209.759	109.72	96.8117	171.034	261.392	87.1305	#REF!	1397.32	797.083	935.846	1261.78	1271.46
	2446	44260	2159	6	Medial entorhinal cortex layer 5	MEnt5	MEnt	44260	0.17212	87.1485	197.54	203.346	75.5287	952.824	98.7683	203.346	81.3386	145.248	174.297	168.487	40.6693	#REF!	964.443	842.436	737.857	1074.83	1435.05
	2447	44270	2159	6	Medial entorhinal cortex layer 6	MEnt6	MEnt	44270	0.1272	62.8931	133.65	188.679	86.478	738.994	47.1698	157.233	70.7547	86.478	188.679	243.711	47.1698	#REF!	660.377	770.44	652.516	668.239	911.95
	2161	44280	909	5	Caudomedial entothinal cortex	CEnt	ENT	44280	3.19288	193.869	333.55	229.887	237.716	557.49	41.9684	161.61	48.5455	47.9191	74.2277	213.913	97.091	#REF!	405.277	287.828	407.782	350.781	534.94
	2448	44290	2161	6	Caudomedial entothinal cortex layer 1	CEnt1	CEnt	44290	0.69036	188.308	427.31	218.726	223.072	463.526	27.5219	139.058	40.5585	55.0437	50.6982	186.859	97.0508	#REF!	783.649	473.666	628.658	564.923	717.017
	2449	44291	2161	6	Caudomedial entothinal cortex layer 2	CEnt2	CEnt	44291	0.78064	228.018	339.47	222.894	252.357	687.897	48.678	155.001	39.711	52.521	76.86	199.836	81.984	#REF!	316.407	228.018	411.201	395.829	546.987
	2450	44292	2161	6	Caudomedial entothinal cortex layer 3	CEnt3	CEnt	44292	0.85632	203.195	316.47	253.41	254.578	506.82	52.5504	171.665	50.2149	28.0269	75.9062	137.799	96.9264	#REF!	179.839	183.343	261.584	182.175	422.739
	2451	44293	2161	6	Caudomedial entothinal cortex layer 5	CEnt5	CEnt	44293	0.4638	101.337	252.26	194.049	254.42	459.25	25.8732	144.459	32.3415	38.8098	77.6197	258.732	68.9953	#REF!	133.678	94.8685	92.7124	53.9025	211.298
	2452	44294	2161	6	Caudomedial entothinal cortex layer 6	CEnt6	CEnt	44294	0.0584	171.233	291.1	68.4932	136.986	856.164	0	17.1233	0	0	68.4932	256.849	119.863	#REF!	393.836	376.712	342.466	222.603	376.712
	843	44300	822	4	Parasubiculum	PaS	RHP	44300	1.30356	136.549	227.07	222.468	135.782	461.045	172.905	106.631	56.7676	51.3977	50.6306	185.645	69.0417	#REF!	115.07	88.22	151.125	204.057	293.811
	10693	44400	843	6	Parasubiculum layer 1	PaS1	PaS	44400	0.3246	107.825	104.74	289.587	101.664	462.107	201.338	147.874	33.8879	67.7757	40.0493	209.489	67.7757	#REF!	311.152	231.054	462.107	483.672	563.771
	10694	44500	843	6	Parasubiculum layer 2	PaS2	PaS	44500	0.74528	148.937	238.84	206.634	159.672	509.875	159.425	89.8991	63.0635	40.2533	61.7218	169.064	77.8231	#REF!	46.9622	49.6458	49.6458	132.836	224.077
	10695	44600	843	6	Parasubiculum layer 3	PaS3	PaS	44600	0.19356	108.493	377.14	165.323	103.327	253.151	170.684	123.993	82.6617	72.329	30.9981	247.985	46.4972	#REF!	15.4991	5.1664	20.6654	36.1645	129.159
	1037	44700	822	4	Postsubiculum	Post	RHP	44700	1.15092	256.317	389.25	274.563	248.497	847.148	17.128	321.482	92.1002	86.0181	270.219	353.63	162.479	#REF!	16.5085	26.0661	92.1002	62.5586	324.957
	10696	44800	1037	6	Postsubiculum layer 1	Post1	Post	44800	0.29304	273	371.96	286.65	276.413	706.388	27.2628	392.438	95.5501	95.5501	293.475	371.963	201.338	#REF!	40.95	54.6001	208.163	105.788	754.163
	10697	44900	1037	6	Postsubiculum layer 2	Post2	Post	44900	0.5708	254.029	406.45	275.053	224.247	942.537	12.6072	331.114	78.8367	73.5809	261.037	362.649	147.162	#REF!	5.2558	14.0154	47.302	49.054	140.154
	10698	45000	1037	6	Postsubiculum layer 3	Post3	Post	45000	0.28708	243.834	372.72	261.251	268.218	801.17	16.6889	229.901	114.951	101.017	264.735	316.985	153.267	#REF!	13.9334	20.9001	62.7003	45.2835	254.285
	1084	45190	822	4	Presubiculum	PsS	RHP	45190	0.58384	130.173	393.94	193.546	118.183	899.219	35.288	126.747	56.5223	30.8304	99.3423	80.5015	49.6711	#REF!	54.8095	63.3735	126.747	133.598	172.993
	10699	45200	1084	6	Presubiculum layer 1	PsS1	PRE	45200	0.14672	136.314	333.97	265.812	177.208	477.099	36.9686	143.13	136.314	61.3413	156.761	122.683	115.867	#REF!	190.84	177.208	354.417	388.495	429.389
	10700	45300	1084	6	Presubiculum layer 2	PsS2	PRE	45300	0.31728	144.982	371.91	167.045	100.857	1137.8	34.8862	116.616	18.9107	18.9107	66.1876	66.1876	31.5179	#REF!	9.4554	28.3661	53.5804	56.7322	78.7948
	10701	45400	1084	6	Presubiculum layer 3	PsS3	PRE	45400	0.11984	83.4446	525.7	175.234	91.7891	784.379	30.9981	133.511	58.4112	25.0334	116.822	66.7557	16.6889	#REF!	8.3445	16.6889	41.7223	25.0334	108.478
	502	45500	822	4	Subiculum	SUB	RHP	45500	4.81536	149.729	348.88	227.605	127.093	766.09	109.026	215.56	92.4126	127.509	211.407	245.464	146.199	#REF!	457.494	315.449	559.875	472.031	801.394
	509	45600	502	5	Dorsal subiculum	DS	SUB	45600	1.29672	250.632	385.59	286.878	222.099	481.985	300.759	437.257	188.938	247.548	467.333	441.113	281.479	#REF!	155.778	80.2024	237.522	148.837	420.291
	829	45700	509	6	Dorsal subiculum molecular layer	DS-m	DS	45700	0.0638	62.6959	62.7	109.718	125.392	156.74	47.0219	62.6959	47.0219	15.674	62.6959	47.0219	31.348	#REF!	141.066	15.674	109.718	94.0439	470.219
	845	45800	509	6	Dorsal subiculum pyramidal layer	DS-sp	DS	45800	0.32268	223.131	393.58	241.726	133.259	644.601	300.607	520.64	201.438	291.31	452.461	449.362	285.112	#REF!	316.103	136.358	371.885	192.141	545.432
	837	45900	509	6	Dorsal subiculum stratum radiatum	DS-sr	DS	45900	0.09752	0	82.03	20.5086	20.5086	30.7629	123.052	123.052	30.7629	71.7801	164.069	194.832	112.797	#REF!	51.2715	20.5086	102.543	41.0172	143.56
	518	46000	502	5	Ventral subiculum	VeS	SUB	46000	1.083	190.212	397.05	307.479	129.27	965.836	22.1607	125.577	60.9418	51.7082	79.409	303.786	138.504	#REF!	1072.02	685.134	1284.4	1077.56	1522.62
	853	46100	518	6	Ventral subiculum molecular layer	VeS-m	VeS	46100	0.08728	80.2016	183.32	355.179	80.2016	171.861	45.8295	229.148	68.7443	45.8295	80.2016	378.094	22.9148	#REF!	366.636	114.574	114.574	378.094	286.435
	870	46200	518	6	Ventral subiculum pyramidal layer	VeS-sp	VeS	46200	0.27976	117.958	310.98	189.448	146.554	1165.28	3.5745	114.384	28.5959	28.5959	53.6174	275.236	228.768	#REF!	1050.9	711.324	1276.09	1229.63	1990.99
	861	46300	518	6	Ventral subiculum stratum radiatum	VeS-sr	VeS	46300	0.11128	278.577	332.49	395.399	107.836	907.62	0	161.754	89.8634	35.9454	44.9317	350.467	197.7	#REF!	916.607	629.044	332.495	718.907	1240.12
	2440	46310	502	5	Subiculum transition area	STr	SUB	46310	2.39132	72.7632	303.18	157.654	66.4905	834.267	38.0543	131.308	53.9451	96.5994	119.181	102.872	71.9268	#REF!	350.016	280.598	416.506	377.197	679.959
	2441	46320	2440	6	Subiculum transition area molecular layer	STr-m	STr	46320	0.3678	67.9717	228.38	119.63	32.6264	43.5019	43.5019	152.257	38.0642	119.63	171.289	59.8151	92.4415	#REF!	70.6906	38.0642	73.4095	54.3774	241.979
	2442	46330	2440	6	Subiculum transition area pyramidal layer	STr-sp	STr	46330	1.69652	80.7535	326.55	176.833	72.5014	1104.02	31.8299	118.478	51.8709	77.8063	90.7741	113.173	61.8914	#REF!	388.442	326.551	469.785	429.703	783.368
	2443	46340	2440	6	Subiculum transition area stratum radiatum	STr-sr	STr	46340	0.327	36.6972	266.06	100.917	73.3945	324.159	64.2202	174.312	82.5688	168.196	207.951	97.8593	100.917	#REF!	464.832	314.985	525.994	467.89	636.086
	703	46400	688	2	Cortical subplate	CTXsp	CTX	46400	9.4596	333.735	354.03	387.649	288.807	750.877	79.8131	167.66	202.968	181.297	93.1329	356.569	236.162	#REF!	394.837	492.515	523.489	381.094	601.611
	16	46500	703	3	Layer 6b isocortex	6b	CTXsp	46500	0	#DIV/0!	#DIV/0!	#DIV/0!	#DIV/0!	#DIV/0!	#DIV/0!	#DIV/0!	#DIV/0!	#DIV/0!	#DIV/0!	#DIV/0!	#DIV/0!	#REF!	#DIV/0!	#DIV/0!	#DIV/0!	#DIV/0!	#DIV/0!
	583	46600	703	3	Claustrum	Cl	CTXsp	46600	0.81	55.5556	53.09	158.025	35.8025	1366.67	32.0988	30.8642	18.5185	24.6914	18.5185	66.6667	53.0864	#REF!	546.914	958.025	975.309	869.136	961.728
	2002	46610	583	4	Dorsal claustrum	DCl	Cl	46610	0.22824	87.6271	87.63	131.441	56.9576	1099.72	39.4322	35.0508	21.9068	17.5254	17.5254	100.771	56.9576	#REF!	324.22	836.838	845.601	771.118	1007.71
	2003	46620	583	4	Ventral claustrum	VCl	Cl	46620	0.35368	67.858	33.93	200.746	31.1016	1603.14	19.7919	42.4112	22.6193	31.1016	25.4467	62.2031	39.5838	#REF!	952.839	1179.03	1184.69	1190.34	1331.71
	942	46700	703	3	Endopiriform nucleus	En	CTXsp	46700	3.42052	183.89	283.87	346.439	110.51	964.473	87.706	87.1213	74.5501	117.526	79.2277	204.647	148.515	#REF!	228.913	431.513	443.5	298.785	529.159
	952	46800	942	4	Dorsal endopiriform nucleus	DEn	En	46800	2.31928	134.956	253.96	332.431	63.3817	926.149	42.2545	62.9506	45.7038	73.7298	40.961	169.88	100.031	#REF!	247.922	340.623	383.74	268.187	512.228
	966	46900	942	4	Ventral endopiriform nucleus	VEn	En	46900	0.40064	214.657	167.23	217.153	269.569	561.601	12.48	24.9601	212.161	82.3682	9.984	321.985	294.529	#REF!	359.425	451.777	369.409	326.977	484.225
	2085	46910	942	4	Intermediate endopiriform claustrum	IEn	En	46910	0.67548	316.812	429.32	467.815	145.082	1366.44	284.242	208.74	85.8649	278.321	241.31	248.712	229.466	#REF!	87.3453	740.214	701.723	389.353	615.858
	2426	46920	942	4	Retroendopiriform nucleus	REn	En	46920	0.02512	636.943	995.22	437.898	995.223	119.427	199.045	39.8089	238.853	398.089	358.28	358.28	119.427	#REF!	199.045	199.045	199.045	238.853	477.707
	131	47000	703	3	Lateral amygdaloid nucleus	La	CTXsp	47000	0.76148	263.96	321.74	291.538	240.321	475.39	21.0117	131.323	135.263	106.372	32.8308	374.271	244.261	#REF!	413.668	416.295	546.305	340.127	726.217
	2068	47010	131	4	Lateral amygdaloid nucleus dorsolateral part	LaDL	La	47010	0.41288	169.541	234.94	271.265	184.073	569.173	4.844	26.6421	53.2842	33.9082	9.688	222.825	171.963	#REF!	368.146	443.228	581.283	353.614	881.612
	2052	47020	131	4	Lateral amygdaloid nucleus ventrolateral part	LaVL	La	47020	0.16652	150.132	150.13	114.1	168.148	186.164	12.0106	102.09	120.106	78.0687	66.0581	390.344	114.1	#REF!	420.37	264.233	474.418	240.211	372.328
	2060	47030	131	4	Lateral amygdaloid nucleus ventromedial part	LaVM	La	47030	0.17212	592.61	714.62	522.891	447.362	540.321	69.7188	418.313	354.404	313.735	58.099	737.857	557.75	#REF!	540.321	488.032	551.941	412.503	720.428
	295	47100	703	3	Basolateral amygdalar nucleus	BL	CTXsp	47100	1.84388	404.039	395.9	341.128	484.305	515.218	143.176	248.932	317.808	284.183	214.222	458.815	276.048	#REF!	355.229	345.467	429.529	332.993	523.895
	303	47200	295	4	Basolateral amygdaloid nucleus anterior part	BLA	BL	47200	0.66396	311.766	329.84	278.631	346.406	847.943	135.55	204.832	302.729	228.929	207.844	433.761	274.113	#REF!	254.533	414.182	432.255	381.047	603.952
	311	47300	295	4	Basolateral amygdaloid nucleus posterior part	BLP	BL	47300	0.93236	508.387	471.92	378.609	636.02	344.288	176.97	285.298	353.94	358.231	261.702	485.864	279.935	#REF!	431.164	333.562	463.34	350.723	515.895
	451	47400	295	4	Basolateral amygdaloid nucleus ventral part	BLV	BL	47400	0.24756	258.523	286.8	367.588	282.76	266.602	36.3548	230.247	222.168	153.498	52.5125	424.14	266.602	#REF!	339.312	206.011	294.878	137.34	339.312
	319	47500	703	3	Basomedial amygdalar nucleus	BM	CTXsp	47500	1.23544	450.852	423.33	487.276	339.15	679.11	63.1354	185.359	331.056	229.068	80.1334	481.61	304.345	#REF!	768.957	705.012	639.448	501.036	702.584
	327	47600	319	4	Basomedial amygdaloid nucleus anterior part	BMA	BM	47600	0.5586	327.605	313.28	452.918	205.872	911.207	19.6921	69.8174	232.725	96.6702	34.0136	422.485	232.725	#REF!	972.073	871.822	730.397	685.643	773.362
	334	47700	319	4	Basomedial amygdaloid nucleus posterior part	BMP	BM	47700	0.67684	552.568	514.15	515.631	449.146	487.56	98.9894	280.716	412.21	338.337	118.196	530.406	363.454	#REF!	601.324	567.342	564.387	348.679	644.17
	780	47800	703	3	Amygdalohippocampal area	AHi	CTXsp	47800	1.05688	660.434	567.71	603.664	595.148	385.096	40.6858	313.186	335.894	238.438	51.0938	617.856	403.073	#REF!	417.266	407.804	468.36	260.2	518.507
	2086	47810	780	4	Amygdalohippocampal area anterolateral part	AHiAL	AHi	47810	0.59196	839.584	724.71	719.643	731.468	342.929	69.2614	393.608	483.141	337.861	54.0577	716.265	530.441	#REF!	366.579	380.093	356.443	283.803	518.616
	2087	47820	780	4	Amygdalohippocampal area posteromedial part	AHiPM	AHi	47820	0.4058	372.104	293.25	423.854	344.998	433.711	4.9285	182.356	125.678	83.7851	32.0355	468.211	219.32	#REF!	460.818	433.711	633.317	219.32	480.532
	2088	47830	780	4	Amygdalohippocampal area posterolateral	AHiPL	AHi	47830	0.05912	845.737	879.57	676.59	947.226	473.613	0	405.954	304.466	304.466	152.233	659.675	389.039	#REF!	625.846	507.442	456.698	304.466	778.078
	623	47900	567	1	Cerebral nuclei	CNU	CH	47900	54.454	302.641	345.59	370.459	165.479	397.951	163.477	170.07	225.273	233.886	201.381	301.576	243.012	#REF!	112.884	214.934	252.58	237.981	296.599
	477	48000	623	2	Striatum	STR	CNU	48000	44.5232	252.026	301.64	327.762	146.845	379.218	151.022	153.762	177.997	201.019	182.444	246.972	201.715	#REF!	101.161	197.807	232.957	220.447	282.01
	485	48100	477	3	Striatum dorsal region	STRd	STR	48100	25.9973	139.822	159.29	250.642	76.1618	127.167	54.7365	70.2766	88.24	76.3157	74.8155	135.283	93.8175	#REF!	17.348	84.5858	118.166	86.3937	173.21
	672	48200	485	4	Caudate Putamen	CP	STRd	48200	25.9973	139.822	159.29	250.642	76.1618	127.167	54.7365	70.2766	88.24	76.3157	74.8155	135.283	93.8175	#REF!	17.348	84.5858	118.166	86.3937	173.21
	2376	48210	672	5	Caudoputamen- rostral extreme	CPre	CP	48210	0.92276	187.481	348.95	308.856	114.873	374.962	89.9475	165.807	72.6083	147.384	126.793	223.243	190.732	#REF!	9.7533	174.477	200.486	80.1942	99.7009
	2491	48220	672	5	Caudoputamen- rostral	CPr	CP	48220	4.40896	151.736	167.84	175.325	73.2599	74.6208	81.1983	82.1055	100.25	108.416	122.478	140.623	114.766	#REF!	8.8456	55.115	63.9607	42.6404	23.5883
	2294	48221	2491	6	Caudoputamen- rostral medial	CPr, m	CPr	48221	0.55012	274.486	263.58	139.97	174.507	309.024	152.694	183.596	256.308	207.227	289.028	245.401	198.139	#REF!	27.2668	252.672	285.392	101.796	45.4446
	2295	48222	2491	6	Caudoputamen- rostral intermediate dorsal	CPr, imd	CPr	48222	0.79924	63.8106	215.2	145.138	58.8059	15.0143	33.7821	71.3178	100.095	98.8439	102.597	137.631	142.636	#REF!	3.7536	15.0143	17.5166	26.275	12.5119
	2296	48223	2491	6	Caudoputamen- rostral intermediate ventral	CPr, imv	CPr	48223	0.84596	180.86	190.32	165.493	118.209	91.0209	172.585	147.761	140.669	161.946	243.51	157.218	120.573	#REF!	5.9104	40.191	47.2836	27.188	26.006
	2497	48224	2491	6	Caudoputamen- rostral lateral	CPr, l	CPr	48224	2.21364	141.848	118.36	198.768	36.1396	31.6221	45.6262	35.6878	46.078	66.8582	42.0123	109.322	81.7658	#REF!	7.2279	26.2012	32.0739	39.7535	21.232
	2395	48225	2497	6	Caudoputamen- rostral lateral lateral strip	CPr, l, ls	CPr, l	48225	1.3178	42.4951	26.56	107.755	24.2829	15.9357	21.2475	10.6238	14.418	17.4533	17.4533	21.2475	18.2122	#REF!	9.1061	19.7299	34.1478	28.8359	17.4533
	2297	48226	2497	6	Caudoputamen- rostral lateral ventromedial	CPr, l, vm	CPr, l	48226	0.89584	287.998	253.39	332.649	53.581	54.6973	81.4878	72.5576	92.6505	139.534	78.139	238.882	175.255	#REF!	4.4651	35.7207	29.023	55.8135	26.7905
	2492	48230	672	5	Caudoputamen- intermediate	CPi	CP	48230	12.1958	142.098	134.8	284.114	64.6124	79.6996	53.133	63.0545	80.1915	58.7087	82.4874	122.829	68.7942	#REF!	8.6095	61.3326	72.238	65.6783	77.7317
	2498	48231	2492	6	Caudoputamen- intermediate dorsomedial	CPi, dm	CPi	48231	3.38852	83.8124	91.49	149.623	74.959	203.334	94.7316	110.963	93.5512	75.2541	149.033	94.4365	94.7316	#REF!	5.9023	116.275	157.591	121.882	82.0417
	2299	48232	2498	6	Caudoputamen- intermediate dorsomedial dorsolateral	CPi, dm, dl	Cpi, dm	48232	0.86792	5.7609	6.91	200.479	21.8914	11.5218	9.2174	25.348	20.7392	14.9783	21.8914	40.3263	20.7392	#REF!	0	14.9783	11.5218	27.6523	62.2177
	2298	48233	2498	6	Caudoputamen- intermediate dorsomedial intermedial	CPi, dm, im	Cpi, dm	48233	0.8002	209.948	252.44	197.451	134.966	381.155	274.931	318.67	272.432	221.195	407.398	242.439	249.938	#REF!	14.9963	244.939	454.886	254.936	71.2322
	2374	48234	2498	6	Caudoputamen- intermediate dorsomedial central dorsal	CPi, dm, cd	Cpi, dm	48234	0.78352	58.7094	57.43	71.4723	105.932	24.2495	66.3672	44.6702	66.3672	44.6702	112.314	42.1176	82.959	#REF!	0	20.4207	26.8021	16.5918	20.4207
	2380	48235	2498	6	Caudoputamen- intermediate dorsomedial dorsal tip	CPi, dm, dt	Cpi, dm	48235	0.93688	69.3792	60.84	127.017	46.9644	378.917	43.7623	68.3118	30.9538	32.0212	76.8508	61.9076	40.5602	#REF!	8.539	180.386	148.365	183.588	161.173
	2500	48236	2492	6	Caudoputamen- intermediate ventromedial	CPi, vm	CPi	48236	1.86368	309.066	229.12	515.646	94.4368	63.3156	78.3396	71.3642	135.753	96.5831	97.6563	271.506	101.412	#REF!	6.4389	26.2921	61.1693	23.6092	37.5601
	2302	48237	2500	6	Caudoputamen- intermediate ventromedial ventromedial	CPi, vm, vm	CPi, vm	48237	0.7884	256.215	216.89	357.687	161.086	112.887	143.328	107.813	191.527	166.159	164.891	262.557	136.986	#REF!	10.1471	32.9782	117.96	24.0994	34.2466
	2480	48238	2500	6	Caudoputamen- intermediate ventromedial ventral	CPi, vm, v	CPi, vm	48238	0.78376	464.428	311.32	830.611	35.7252	26.7939	29.3457	56.1396	113.555	52.3119	49.7601	376.391	96.9685	#REF!	2.5518	26.7939	22.9662	19.1385	44.6565
	2483	48239	2500	6	Caudoputamen- intermediate ventromedial central ventromedial	CPi, vm, cvm	CPi, vm	48239	0.29152	34.303	41.16	96.0483	72.0362	27.4424	34.303	13.7212	44.5939	27.4424	44.5939	13.7212	17.1515	#REF!	6.8606	6.8606	10.2909	34.303	27.4424
	2499	48240	2492	6	Caudoputamen- intermediate dorsolateral	CPi, dl	CPi	48240	2.06764	9.67286	22.25	190.555	15.4766	8.2219	5.3201	8.7056	8.7056	5.3201	11.6074	17.8948	20.313	#REF!	5.8037	6.2874	8.2219	18.8621	50.7825
	2300	48241	2499	6	Caudoputamen- intermediate dorsolateral dorsal	CPi, dl, d	Cpi, dl	48241	1.06432	16.9122	35.7	137.177	11.2748	9.3957	5.6374	9.3957	9.3957	2.8187	13.1539	21.61	18.7913	#REF!	5.6374	4.6978	13.1539	17.8518	56.374
	2301	48242	2499	6	Caudoputamen- intermediate dorsolateral intermedial dorsal	CPi, dl, imd	Cpi, dl	48242	1.00332	1.99338	7.97	247.179	19.9338	6.9768	4.9835	7.9735	7.9735	7.9735	9.9669	13.9537	21.9272	#REF!	5.9801	7.9735	2.9901	19.9338	44.8511
	2501	48243	2492	6	Caudoputamen- intermediate ventrolateral	CPi, vl	CPi	48243	4.87596	174.94	176.58	328.756	66.8586	30.353	34.8649	49.6313	79.9842	55.3737	60.5009	130.231	58.8602	#REF!	12.5104	59.8856	44.299	62.5518	101.519
	2479	48244	2501	6	Caudoputamen- intermediate ventrolateral intermedial ventral	CPi, vl, imv	CPi, vl	48244	0.95476	11.5212	10.47	189.576	13.616	4.1895	3.1422	3.1422	7.3317	7.3317	7.3317	17.8055	11.5212	#REF!	1.0474	16.7581	12.5686	34.5637	68.0799
	2482	48245	2501	6	Caudoputamen- intermediate ventrolateral ventral	CPi, vl, v	CPi, vl	48245	1.19744	198.757	235.5	331.541	88.5222	70.1497	41.7557	72.655	106.06	74.3252	82.6764	162.847	81.8413	#REF!	30.0641	123.597	86.852	121.092	175.374
	2481	48246	2501	6	Caudoputamen- intermediate ventrolateral ventral tip	CPi, vl, vt	CPi, vl	48246	1.92736	292.109	264.09	479.412	103.25	26.9799	58.6294	75.7513	115.183	86.1282	88.7224	199.236	80.9397	#REF!	10.8957	61.2236	43.0641	55.5164	106.882
	2370	48247	2501	6	Caudoputamen- intermediate ventrolateral central ventrolateral	CPi, vl, cvl	CPi, vl	48247	0.7964	51.4817	75.34	126.821	10.0452	10.0452	5.0226	7.5339	42.6921	10.0452	22.6017	48.9704	27.6243	#REF!	3.767	12.5565	21.3461	25.113	17.5791
	2496	48250	672	5	Caudoputamen- caudal	CPc	CP	48250	7.33052	120.455	164.11	232.999	84.5779	141.873	42.0161	62.6149	98.9016	73.801	33.5583	135.734	96.5825	#REF!	23.0543	100.811	140.918	97.6738	327.262
	2493	48251	2496	6	Caudoputamen- caudal dorsal	CPc, d	CPc	48251	2.189	41.5715	74.46	180.448	29.2371	244.404	11.8776	22.3847	34.719	16.9027	39.7442	67.6108	47.0534	#REF!	22.3847	148.927	183.645	120.603	252.627
	2484	48252	2493	6	Caudoputamen- caudal dorsal dorsomedial	CPc, d, dm	CPc, d	48252	0.65752	19.7713	25.85	129.274	10.6461	462.343	7.6043	3.0417	6.0835	6.0835	34.9799	34.9799	41.0634	#REF!	10.6461	235.734	267.673	188.587	396.946
	2485	48253	2493	6	Caudoputamen- caudal dorsal dorsolateral	CPc, d, dl	CPc, d	48253	0.76636	16.9633	33.93	161.804	5.2195	35.2315	5.2195	5.2195	16.9633	2.6097	18.2682	22.1828	24.7925	#REF!	6.5243	20.8779	28.7071	14.3536	88.7311
	2486	48254	2493	6	Caudoputamen- caudal dorsal ventromedial	CPc, d, vm	CPc, d	48254	0.39328	50.8544	33.06	104.251	25.4272	99.166	15.2563	33.0553	45.7689	15.2563	40.6835	104.251	30.5126	#REF!	12.7136	127.136	183.076	25.4272	71.1961
	2494	48255	2496	6	Caudoputamen- caudal intermediate	CPc, i	CPc	48255	3.52068	137.757	200.81	256.2	83.7906	99.1286	57.6593	71.8611	108.786	89.4714	27.2675	152.811	92.3117	#REF!	17.8943	56.2391	91.4596	61.6358	352.489
	2487	48256	2494	6	Caudoputamen- caudal intermediate dorsal	CPc, i, d	CPc, i	48256	0.97012	110.296	164.93	215.437	42.2628	19.5852	53.6016	73.1868	80.4024	71.1252	27.8316	121.634	96.8952	#REF!	5.154	17.5236	35.0472	40.2012	175.236
	2489	48257	2494	6	Caudoputamen- caudal intermediate ventromedial	CPc, i, vm	CPc, i	48257	0.74564	104.608	190.44	194.464	50.9629	17.4347	41.575	57.6686	155.571	75.1033	13.4113	183.735	57.6686	#REF!	26.8226	61.692	71.0799	45.5984	226.651
	2488	48258	2494	6	Caudoputamen- caudal intermediate ventrolateral	CPc, i, vl	CPc, i	48258	0.82232	215.245	249.29	378.198	148.361	21.8893	83.9089	119.175	143.496	156.873	46.2107	207.948	159.305	#REF!	4.8643	55.9393	94.8536	60.8036	238.35
	2490	48259	2496	6	Caudoputamen- caudal ventral	CPc, v	CPc	48259	1.62084	189.408	205.45	253.572	161.028	96.2464	48.7402	96.8634	164.112	116.606	38.8687	190.642	172.75	#REF!	35.167	132.647	190.642	144.987	373.263
	2495	48260	672	5	Caudoputamen- caudal extreme	CPce	CP	48260	0.72712	63.2633	130.65	217.296	71.515	618.88	0	22.0046	17.8788	34.3822	13.7529	72.8903	100.396	#REF!	85.2679	198.042	528.111	350.699	837.551
	2001	48296	672	5	Lateral stripe of the striatum	LSS	Cpu	48296	0.1038	19.2678	115.61	115.607	19.2678	915.222	192.678	115.607	134.875	115.607	173.41	250.482	154.143	#REF!	38.5356	260.116	221.58	202.312	356.455
	2050	48297	672	5	Amygdalostriatal transition area	ASt	Cpu	48297	0.30832	418.396	405.42	372.989	288.661	240.01	19.4603	181.63	178.386	246.497	25.9471	385.963	392.449	#REF!	204.333	444.344	921.121	619.486	1018.42
	493	48300	477	3	Striatum ventral region	STRv	STR	48300	10.7	405.793	478.41	445.045	220.84	759.997	260.747	245.046	204.111	322.242	326.915	321.214	295.139	#REF!	182.616	327.288	325.326	370.092	353.55
	56	48400	493	4	Accumbens nucleus	Acb	STRv	48400	4.80392	460.041	565.16	499.384	268.739	778.531	315.159	305.167	230.229	412.996	417.159	389.474	342.429	#REF!	70.5674	324.11	244.8	345.135	261.245
	2074	48410	56	5	Accumbens nucleus core region	AcbC	Acb	48410	2.05576	340.993	441.2	452.387	200.412	472.331	261.217	274.837	181.441	400.339	334.669	332.237	303.051	#REF!	28.2134	256.839	150.796	259.758	113.34
	2006	48420	56	5	Accumbens nucleus shell region	AcbSh	Acb	48420	1.73988	708.095	844.31	641.423	466.699	1248.94	471.872	441.41	341.403	568.43	652.344	518.427	455.779	#REF!	147.711	501.184	427.616	558.659	509.805
	2007	48430	56	5	Lateral accumbens shell region	LAcbSh	Acb	48430	1.00828	274.725	336.22	350.101	66.4498	591.106	154.719	131.908	137.858	170.588	179.514	283.651	227.119	#REF!	23.8029	155.711	120.998	150.752	133.891
	998	48500	493	4	Interstitial nucleus of the posterior limb of the anterior commissure	IPAC	STRv	48500	1.07112	264.209	212.86	380.91	110.165	240.869	47.6137	103.63	154.978	144.708	58.8169	249.272	170.849	#REF!	37.3441	168.982	186.72	168.048	252.073
	2012	48510	998	5	Interstitial nucleus of the posterior limb of the anterior commissure medial part	IPACM	IPAC	48510	0.33584	241.186	205.45	419.843	80.3954	297.761	50.6193	92.3059	142.925	116.127	20.8433	253.097	157.813	#REF!	35.7313	163.768	136.97	157.813	253.097
	2372	48520	998	5	Interstitial nucleus of the posterior limb of the anterior commissure lateral part	IPACL	IPAC	48520	0.67876	271.083	200.37	359.479	92.8163	222.464	41.2517	94.2896	154.694	139.961	67.7706	251.93	172.373	#REF!	36.8319	175.32	191.526	154.694	216.571
	754	48600	493	4	Olfactory tubercle	Tu	STRv	48600	4.52084	339.981	418.73	387.76	177.401	839.446	231.373	202.617	164.571	243.76	258.58	256.368	247.299	#REF!	321.179	351.926	431.778	435.76	468.276
	481	48700	754	5	Island of Calleja	ICj	Tu	48700	0.0464	646.552	883.62	474.138	280.172	926.724	301.724	280.172	301.724	474.138	452.586	237.069	344.828	#REF!	64.6552	366.379	603.448	387.931	237.069
	489	48800	754	6	Island of Calleja major island	ICjM	Tu	48800	0.05172	1140.76	1314.77	1024.75	754.06	1527.46	792.73	754.06	676.721	1256.77	889.404	696.056	676.721	#REF!	135.344	522.042	483.372	464.037	309.358
	458	49000	754	5	Olfactory tubercle 1	Tu1	Tu	49000	1.3294	248.232	297.13	276.817	145.93	910.185	176.019	143.674	137.656	188.055	185.046	166.24	185.046	#REF!	608.545	343.012	638.634	859.034	896.645
	465	49100	754	5	Olfactory tubercle 2	Tu2	Tu	49100	0.91608	301.284	423.54	331.849	144.092	737.927	242.337	210.68	155.008	223.78	270.719	213.955	248.887	#REF!	361.322	599.293	498.865	143.001	194.306
	473	49200	754	5	Olfactory tubercle 3	Tu3	Tu	49200	1.719	325.189	414.78	394.415	146.597	811.518	217.568	190.809	151.251	236.766	245.492	284.468	250.145	#REF!	30.8319	166.958	180.337	245.492	260.617
	2018	49210	754	5	Navicular nucleus of the basal forebrain	Nv	Tu	49210	0.10988	1319.62	1201.31	1428.83	946.487	1046.6	491.445	400.437	364.034	664.361	746.269	618.857	546.05	#REF!	364.034	691.664	555.151	382.235	373.134
	275	49300	477	3	Lateral septal complex	LSX	STR	49300	4.3512	342.434	569.73	356.224	241.543	692.912	484.464	380.585	447.233	566.281	553.64	500.552	455.736	#REF!	100.202	216.032	354.155	367.945	426.549
	242	49400	275	4	Lateral septal nucleus	LS	LSX	49400	3.45824	314.9	504.01	316.635	197.21	757.611	458.326	373.89	433.747	536.689	512.688	473.651	421.602	#REF!	100.918	223.524	369.841	371.576	449.072
	250	49500	242	5	Lateral septal nucleus dorsal part	LSD	LS	49500	0.6568	331.912	596.83	309.074	223.812	324.3	627.284	644.032	698.843	711.023	768.879	666.87	619.671	#REF!	47.1985	77.6492	298.417	284.714	353.228
	258	49600	242	5	Lateral septal nucleus intermediate part	LSI	LS	49600	2.22748	337.152	515.83	355.11	207.409	772.622	425.144	322.786	375.761	520.319	457.468	420.206	373.516	#REF!	124.805	268.914	351.518	318.746	419.308
	266	49700	242	5	Lateral septal nucleus ventral part	LSV	LS	49700	0.54552	197.976	324.46	168.646	111.82	1187.86	397.786	258.469	351.958	403.285	417.95	450.946	357.457	#REF!	71.4914	214.474	538.935	681.918	661.754
	2008	49710	242	5	Zona limitans	ZL	LS	49710	0.02844	421.941	879.04	316.456	421.941	1336.15	316.456	351.617	421.941	351.617	738.397	632.911	843.882	#REF!	35.1617	210.97	210.97	562.588	914.205
	310	49800	275	4	Septofimbrial nucleus	SFi	LSX	49800	0.41356	273.237	486.02	292.582	169.262	50.7786	599.671	396.557	505.368	773.769	551.311	486.024	391.721	#REF!	21.7623	41.1065	132.992	128.155	137.828
	333	49900	275	4	Septohippocampal nucleus	SHi	LSX	49900	0.10448	296.708	995.41	679.556	267.994	679.556	488.132	277.565	334.992	430.704	468.989	411.562	325.421	#REF!	287.136	229.709	363.706	220.138	306.279
	2009	49910	275	4	Septohypothalamic nucleus	SHy	LSX	49910	0.37492	685.48	1149.58	701.483	722.821	808.172	597.461	453.43	538.782	648.138	957.538	789.502	877.52	#REF!	128.027	336.072	450.763	640.137	570.788
	278	50000	477	3	Striatum-like amygdalar nuclei	sAMY	STR	50000	3.47468	504.795	486.66	507.96	329.239	699.633	115.982	213.257	431.982	303.337	77.9928	536.452	403.203	#REF!	478.605	623.367	655.6	577.895	694.74
	23	50100	278	4	Anterior amygdaloid area	AA	sAMY	50100	0.89572	440.986	380.7	406.377	261.242	934.444	140.669	208.771	377.35	338.275	75.9166	453.267	363.953	#REF!	524.717	606.216	570.491	528.067	708.927
	292	50200	278	4	Bed nucleus of the accessory olfactory tract	BAOT	sAMY	50200	0.028	71.4286	142.86	142.857	71.4286	1107.14	0	0	35.7143	0	0	35.7143	0	#REF!	642.857	785.714	785.714	500	571.429
	536	50300	278	4	Central amygdalar nucleus	Ce	sAMY	50300	1.03776	715.002	733.31	633.094	558.896	289.084	183.087	351.719	570.46	464.462	123.343	630.203	582.986	#REF!	253.43	571.423	754.51	770.891	756.437
	544	50400	536	5	Central amygdaloid nucleus capsular part	CeC	Ce	50400	0.2266	542.807	507.5	445.719	498.676	626.655	127.979	286.849	419.241	366.284	141.218	458.959	361.871	#REF!	414.828	935.569	719.329	1059.13	895.852
	551	50500	536	5	Central amygdaloid nucleus lateral part	CeL	Ce	50500	0.34228	654.435	610.61	581.395	435.316	125.628	37.9806	219.119	411.943	245.413	23.3727	572.631	385.649	#REF!	289.237	654.435	1396.52	1031.32	1270.89
	559	50600	536	5	Central amygdaloid nucleus medial part	CeM	Ce	50600	0.46888	842.433	932.01	761.389	678.212	245.265	315.646	479.867	759.256	671.814	187.681	754.991	833.902	#REF!	149.292	334.841	302.849	441.478	313.513
	1105	50700	278	4	Intercalated nuclei of the amygdala	I	sAMY	50700	0.13556	715.55	722.93	715.55	656.536	486.869	243.435	435.232	545.884	442.608	258.188	656.536	641.782	#REF!	509	693.42	796.695	361.464	708.173
	2375	50710	1105	5	Intercalated amygdalar nucleus main part	IM	I	50710	0.04396	545.951	545.95	409.463	386.715	705.187	68.2439	68.2439	386.715	113.74	45.4959	477.707	318.471	#REF!	659.691	1000.91	705.187	432.211	864.422
	403	50800	278	4	Medial amygdaloid nucleus	Me	sAMY	50800	1.37764	376.005	353.5	466.74	173.485	868.877	39.1975	94.3643	360.036	151.709	29.0352	518.278	278.012	#REF!	611.916	663.453	619.901	487.791	640.225
	411	50900	403	5	Medial amygdaloid nucleus anterodorsal part	MeAD	Me	50900	0.23836	591.542	528.61	780.332	167.813	1690.72	46.1487	100.688	616.714	172.009	25.172	801.309	348.213	#REF!	1019.47	1061.42	1053.03	1048.83	1015.27
	418	51000	403	5	Medial amygdaloid nucleus anterventral part	MeAV	Me	51000	0.08004	199.9	374.81	474.763	99.95	1911.54	0	24.9875	87.4563	62.4688	37.4813	224.888	74.9625	#REF!	737.131	687.156	749.625	649.675	824.588
	426	51100	403	5	Medial amygdaloid nucleus posterodorsal part	MePD	Me	51100	0.56272	591.769	486.92	613.093	277.225	447.825	74.6375	161.714	577.552	255.9	33.7646	776.585	469.15	#REF!	415.837	531.348	527.794	350.085	506.469
	435	51500	403	5	Medial amygdaloid nucleus posteroventral part	MePV	Me	51500	0.49652	56.3925	114.8	149.037	70.4906	783.453	2.014	26.1822	34.2383	38.2663	24.1682	136.953	60.4205	#REF!	618.303	618.303	495.448	348.425	582.051
	803	51600	623	2	Pallidum	PAL	CNU	51600	9.9308	529.565	542.66	561.888	249.023	481.935	219.318	243.183	437.226	381.238	286.281	546.381	428.163	#REF!	165.445	291.719	340.557	316.591	362.005
	1022	51800	803	3	Globus pallidus	GP	PAL	51800	2.20144	166.255	170.8	253.925	63.1405	44.9706	31.3431	63.1405	204.866	86.3071	33.6144	208.046	112.199	#REF!	11.3562	27.2549	73.1339	45.8791	172.16
	1031	51900	803	3	Entopeduncular nucleus	EP	PAL	51900	0.21636	73.9508	115.55	203.365	23.1096	281.938	4.6219	41.5973	64.707	36.9754	4.6219	171.011	73.9508	#REF!	9.2439	46.2193	50.8412	50.8412	258.828
	835	52000	803	3	Ventral pallidum	VeP	PAL	52000	2.20704	524.232	487.98	710.001	135.476	473.485	169.911	192.113	274.123	263.248	227.454	491.609	319.432	#REF!	33.076	210.689	152.24	178.52	198.909
	342	52100	803	3	Substantia innominata	SI	PAL	52100	1.48364	759.618	708.39	836.456	313.418	525.734	187.377	316.788	822.976	543.259	157.046	924.079	669.974	#REF!	154.35	322.181	318.81	332.291	336.335
	2371	52110	342	4	Substantia innominata basal part	SIB	SI	52110	0.24536	574.666	391.26	680.633	163.026	1096.35	175.253	228.236	252.69	297.522	211.934	399.413	366.808	#REF!	97.8155	366.808	383.111	297.522	427.943
	2027	52120	342	4	Extension of the amygdala	EA	SI	52120	1.1106	882.406	853.59	931.929	380.875	452.008	211.597	371.871	1040.88	660.004	162.975	1139.02	813.074	#REF!	184.585	323.249	338.556	364.668	340.357
	2013	52130	342	4	Cell bridges of the ventral striatum	CB	SI	52130	0.12768	46.9925	54.82	305.451	15.6642	70.4887	0	7.8321	23.4962	0	0	62.6566	7.8321	#REF!	0	227.13	23.4962	117.481	125.313
	298	52200	835	3	Magnocellular nucleus	MCPO	PAL	52200	0	#DIV/0!	#DIV/0!	#DIV/0!	#DIV/0!	#DIV/0!	#DIV/0!	#DIV/0!	#DIV/0!	#DIV/0!	#DIV/0!	#DIV/0!	#DIV/0!	#REF!	#DIV/0!	#DIV/0!	#DIV/0!	#DIV/0!	#DIV/0!
	2028	52210	835	3	Basal nucleus (Meynert)	B	PAL	52210	0.06248	816.261	992.32	992.317	560.179	320.102	400.128	384.123	528.169	608.195	240.077	896.287	768.246	#REF!	16.0051	128.041	160.051	192.061	336.108
	826	52300	803	3	Pallidum medial region	PALm	PAL	52300	1.915	561.358	639.69	454.83	262.141	992.689	331.07	229.765	402.611	457.963	432.898	455.875	442.82	#REF!	405.744	612.533	726.371	633.943	654.308
	904	52400	826	4	Medial septal complex	MSC	PALm	52400	1.6944	599.622	640.34	475.094	259.679	1113.08	323.418	218.366	401.322	436.733	431.421	450.897	436.143	#REF!	452.077	684.018	759.561	637.984	732.413
	564	52500	904	5	Medial septal nucleus	MS	MSC	52500	0.32252	368.969	582.91	306.958	235.644	409.277	173.633	120.923	201.538	353.466	365.869	210.84	396.875	#REF!	71.3134	210.84	303.857	254.248	502.294
	2005	52510	564	6	Lambdoid septal zone	Ld	MS	52510	0.05612	35.6379	124.73	106.914	178.19	231.647	302.922	142.552	285.103	231.647	213.827	196.009	338.56	#REF!	160.371	124.733	498.931	231.647	730.577
	2280	52600	904	5	Diagonal band nucleus	NDB	MSC	52600	1.37188	653.847	653.85	514.622	265.329	1278.54	358.632	241.275	448.29	456.308	446.832	507.333	445.374	#REF!	541.593	795.259	866.694	728.198	786.512
	596	52610	2280	6	Nucleus of the vertical limb of the diagonal band	VDB	NDB	52610	0.29148	981.199	1286.54	569.507	507.753	1231.65	809.661	387.677	689.584	898.861	1056.68	483.738	624.4	#REF!	428.846	802.799	648.415	514.615	518.046
	2293	52620	2280	6	Lateral nucleus of the diagnoal band	LDB	NDB	52620	0.39048	553.165	486.58	745.237	117.804	747.798	143.413	209.998	391.825	327.802	69.1457	694.018	353.411	#REF!	171.584	494.264	535.239	386.704	601.823
	2004	52630	2280	6	Nucleus of the horizontal limb of the diagonal band	HDB	NDB	52630	0.68992	572.53	481.22	360.911	246.405	1598.74	289.889	197.124	378.305	342.069	402.945	411.642	421.788	#REF!	798.643	962.43	1146.51	1011.71	1004.46
	581	52700	826	4	Triangular septal nucleus	TS	PALm	52700	0.2206	267.452	634.63	299.184	281.052	67.9964	389.846	317.316	412.511	621.034	444.243	494.107	494.107	#REF!	49.864	63.4633	471.442	602.901	54.3971
	809	52800	803	3	Pallidum caudal region	PALc	PAL	52800	1.90732	795.881	857.22	680.536	557.327	471.866	430.447	489.168	671.099	694.168	631.252	839.922	756.035	#REF!	281.547	372.774	529.539	488.12	508.043
	2308	52810	809	4	Nucleus of stria medullaris	SM	PALc	52810	0.03164	695.322	568.9	790.139	316.056	632.111	410.872	316.056	821.745	568.9	505.689	916.561	695.322	#REF!	63.2111	379.267	474.083	316.056	126.422
	351	52900	809	4	Bed nuclei of the stria terminalis	ST	PALc	52900	1.85688	792.189	854.12	676.942	552.54	472.836	422.752	487.915	664.556	690.405	630.628	840.657	747.49	#REF!	288.118	375.899	534.23	494.916	518.073
	359	53000	351	5	Bed nuclei of the stria terminalis anterior division	STa	ST	53000	0.41076	564.807	586.72	501.509	384.653	430.909	396.825	326.225	630.538	669.491	693.836	667.056	676.794	#REF!	119.291	226.41	416.301	399.26	367.611
	537	53100	359	6	Bed nucleus of the stria terminalis medial division anterolateral part	STMAL	STa	53100	0.03324	722.022	872.44	601.685	391.095	240.674	691.937	300.842	541.516	722.022	541.516	511.432	1022.86	#REF!	0	180.505	300.842	150.421	391.095
	498	53200	359	6	Bed nucleus of the stria terminalis medial division anterior part	STMA	STa	53200	0.13148	540.006	844.23	684.515	524.795	365.075	532.4	334.652	524.795	555.217	661.698	555.217	631.275	#REF!	22.8172	106.48	144.509	205.354	289.017
	513	53400	359	5	Bed nuclei of the stria terminalis fusiform nucleus	Fu	STa	53400	0.01244	160.772	643.09	241.158	321.543	884.244	0	160.772	241.158	562.701	241.158	884.244	80.3859	#REF!	0	241.158	160.772	562.701	643.087
	546	53500	359	6	Bed nucleus of the stria terminalis lateral division juxtacapsular part	STLJ	STa	53500	0.01884	371.55	265.39	424.628	53.0786	53.0786	265.393	371.55	371.55	583.864	636.943	477.707	583.864	#REF!	159.236	106.157	583.864	583.864	371.55
	554	53700	359	6	Bed nucleus of the stria terminalis lateral division dorsal part	STLD	STa	53700	0.06528	505.515	260.42	321.691	245.098	91.9118	275.735	337.01	689.338	551.471	811.887	750.613	689.338	#REF!	91.9118	474.877	1056.99	873.162	520.833
	529	53900	359	6	Bed nucleus of the stria terminalis medial division posterolateral part	STMPL	STa	53900	0.14948	635.537	474.98	428.151	367.942	689.055	314.423	327.803	782.713	829.542	749.264	769.334	695.745	#REF!	247.525	247.525	401.392	381.322	341.183
	2359	53910	351	5	Bed nuclei of the stria terminalis medial division	STm	ST	53910	0.38568	1140.84	1439.02	1050.09	886.745	617.092	884.153	878.967	938.602	1195.29	1177.14	1208.26	1169.36	#REF!	287.803	448.558	593.756	653.391	609.313
	2010	53920	2359	6	Bed nucleus of the stria terminalis medial division ventral part	STMV	STm	53920	0.1564	1297.95	1393.86	927.11	971.867	505.115	914.322	1029.41	1003.84	933.504	1317.14	984.655	1093.35	#REF!	70.3325	383.632	505.115	326.087	421.995
	2025	53930	2359	6	Bed nucleus of the stria terminalis medial division posteromedial part	STMPM	STm	53930	0.22928	1033.67	1469.82	1133.98	828.681	693.475	863.573	776.343	894.103	1373.87	1081.65	1360.78	1221.21	#REF!	436.148	492.847	654.222	876.657	737.09
	367	54000	351	5	Bed nuclei of the stria terminalis posterior division	STp	ST	54000	0.20972	1006.1	982.26	653.252	534.045	848.751	619.874	677.093	748.617	882.129	848.751	1144.38	972.726	#REF!	448.217	495.899	643.715	696.166	758.154
	578	54200	367	6	Bed nucleus of the stria terminalis medial division anteromedial part	STMAM	STp	54200	0.01224	408.497	1062.09	816.994	653.595	326.797	163.399	408.497	571.895	571.895	408.497	408.497	653.595	#REF!	163.399	0	245.098	163.399	245.098
	585	54300	367	6	Bed nucleus of the stria terminalis medial division posterointermediate part	STMPI	STp	54300	0.19748	1043.14	977.31	643.103	526.636	881.102	648.167	693.741	759.571	901.357	876.038	1189.99	992.506	#REF!	465.87	526.636	668.422	729.188	789.953
	2360	54510	351	5	Bed nuclei of the stria terminialis lateral division	STl	ST	54510	0.39132	508.535	488.09	490.647	288.766	291.322	224.88	263.212	273.433	309.21	544.312	554.533	421.65	#REF!	51.1091	278.544	362.874	293.877	260.656
	2015	54520	2360	6	Bed nuclus of the stria terminalis lateral division posterior part	STLP	STl	54520	0.19464	364.776	282.57	251.747	205.508	77.0654	179.819	287.711	256.885	287.711	534.32	467.53	400.74	#REF!	56.5146	200.37	375.051	359.638	262.022
	2014	54530	2360	6	Bed nucleus of the stria terminalis lateral division ventral part	STLV	STl	54530	0.155	574.194	690.32	793.548	335.484	619.355	251.613	219.355	251.613	367.742	477.419	593.548	380.645	#REF!	51.6129	412.903	380.645	245.161	296.774
	2022	54540	2360	6	Bed nucleus of the stria terminalis lateral division intermediate part	STLI	STl	54540	0.04168	935.701	695.78	479.846	503.839	71.977	335.892	311.9	431.862	191.939	839.731	815.739	671.785	#REF!	23.9923	143.954	239.923	167.946	119.962
	2049	54550	351	5	Bed nucleus of the stria terminalis intraamygdaloid	STIA	ST	54550	0.4594	846.757	855.46	690.03	655.202	372.225	137.135	409.229	759.687	522.42	89.2468	792.338	631.258	#REF!	568.132	476.709	685.677	526.774	685.677
	287	54600	809	4	Bed nucleus of the anterior commissure	BAC	PALc	54600	0.0188	1329.79	1648.94	851.064	1436.17	106.383	1223.4	904.255	1063.83	1276.6	904.255	638.298	1702.13	#REF!	0	53.1915	159.575	106.383	159.575
In Cerebellum, level 2 is like level 3 of above	512	54700	8	A	Cerebellum	CBL	grey	54700	53.2081	37.8326	28.29	57.4348	44.3917	73.8985	24.3948	36.8929	33.6979	21.4441	32.8521	52.943	51.3268	#REF!	35.2578	23.6618	47.9814	46.3651	127.612
	528	54800	512	1	Cerebellar cortex	CBX	CB	54800	51.3537	35.6352	28.51	57.5421	41.6718	73.1787	22.8805	32.4027	31.2733	18.9665	30.4944	49.8503	48.5262	#REF!	35.1289	23.9905	46.3842	44.8069	128.91
	645	54900	528	2	Vermal regions	VERM	CBX	54900	20.6153	61.7503	39.68	88.6236	65.4369	104.874	41.2316	58.1607	54.1831	33.4218	60.1981	67.4257	71.5004	#REF!	48.3622	22.3621	48.1196	52.3883	183.456
	912	55000	645	3	Lobule 1 of the cerebellar vermis	1Cb	VERM	55000	0.15412	58.3961	64.88	259.538	285.492	493.122	6.4885	259.538	6.4885	0	116.792	64.8845	19.4654	#REF!	330.911	207.63	155.723	317.934	337.399
	10707	55100	912	6	Lobule 1 of the cerebellar vermis molecular layer	1Cb-mo	1Cb	55100	0.06828	14.6456	14.65	336.848	205.038	659.051	0	380.785	0	0	43.9367	0	0	#REF!	336.848	454.013	307.557	556.532	234.329
	10705	55300	912	6	Lobule 1 of the cerebellar vermis granular layer	1Cb-gr	1Cb	55300	0.08584	93.1966	104.85	198.043	349.487	361.137	11.6496	163.094	11.6496	0	174.744	116.496	34.9487	#REF!	326.188	11.6496	34.9487	128.145	419.385
	976	55500	645	3	Lobule 2 of the cerebellar vermis	2Cb	VERM	55500	1.68188	239.018	97.51	156.373	215.235	351.987	110.591	205.722	98.6991	80.8619	241.991	303.827	180.75	#REF!	170.642	93.3479	88.5913	124.86	294.908
	10710	55600	976	6	Lobule 2 of the cerebellar vermis molecular layer	2Cb-mo	2Cb	55600	0.97848	202.355	95.05	171.695	252.432	370.984	142.057	256.52	110.375	75.6275	233.014	313.752	169.651	#REF!	233.014	138.991	136.947	166.585	317.84
	10708	55800	976	6	Lobule 2 of the cerebellar vermis granular layer	2Cb-gr	2Cb	55800	0.7034	290.02	100.94	135.058	163.492	325.562	66.8183	135.058	82.4566	88.1433	254.478	290.02	196.19	#REF!	83.8783	29.855	21.325	66.8183	263.008
	984	55900	645	3	Lobule 3 of the cerebellar vermis	3Cb	VERM	55900	2.20128	88.1305	85.86	123.11	133.104	104.485	105.847	109.482	71.3221	93.1276	114.479	147.641	81.7706	#REF!	51.3338	10.4485	31.3454	84.4963	164.45
	10713	56000	984	6	Lobule 3 of the cerebellar vermis molecular layer	3Cb-mo	3Cb	56000	1.38128	98.4594	92.67	120.178	145.517	120.902	126.694	128.142	70.9487	86.8759	123.074	152.033	83.9801	#REF!	55.0214	13.7554	40.5421	80.3602	185.335
	10711	56200	984	6	Lobule 3 of the cerebellar vermis granular layer	3Cb-gr	3Cb	56200	0.82	70.7317	74.39	128.049	112.195	76.8293	70.7317	78.0488	71.9512	103.659	100	140.244	78.0488	#REF!	45.122	4.878	15.8537	91.4634	129.268
	928	56300	645	3	Culmen	CUL	VERM	56300	6.32376	41.1148	18.82	67.5231	63.4116	120.023	39.2172	63.5698	61.0396	43.9612	40.3241	62.7791	45.8588	#REF!	73.6903	32.1012	85.8666	68.3138	220.122
	992	56400	928	4	Lobule 4 of the cerebellar vermis	4Cb	CUL	56400	0.00608	0	0	0	0	0	0	0	0	0	0	0	0	#REF!	493.421	1315.79	986.842	493.421	1315.79
	1001	56800	928	4	Lobule 5 of the cerebellar vermis	5Cb	CUL	56800	0	#DIV/0!	#DIV/0!	#DIV/0!	#DIV/0!	#DIV/0!	#DIV/0!	#DIV/0!	#DIV/0!	#DIV/0!	#DIV/0!	#DIV/0!	#DIV/0!	#REF!	#DIV/0!	#DIV/0!	#DIV/0!	#DIV/0!	#DIV/0!
	1091	57200	928	4	Lobules 4 and 5 of the cerebellar vermis	4/5Cb	CUL	57200	6.31768	41.1543	18.84	67.5881	63.4727	120.139	39.2549	63.631	61.0984	44.0035	40.3629	62.8395	45.9029	#REF!	73.2864	30.8658	84.9996	67.9047	219.068
	10722	57300	1091	6	Lobules 4 and 5 of the cerebellar vermis molecular layer	4/5Cb-mo	4/5Cb	57300	3.74152	40.3579	20.31	62.5414	53.9888	141.921	37.9525	63.8778	52.6524	39.8234	34.478	66.2832	50.247	#REF!	94.614	42.7634	94.614	86.3286	213.282
	10720	57500	1091	6	Lobules 4 and 5 of the cerebellar vermis granular layer	4/5Cb-gr	4/5Cb	57500	2.57616	42.311	16.69	74.9177	77.2468	88.5038	41.1465	63.2725	73.365	50.0745	48.91	57.838	39.5938	#REF!	42.311	13.5861	71.036	41.1465	227.47
	936	57600	645	3	Lobule 6 of the cerebellar vermis	6Cb	VERM	57600	4.38848	24.1541	3.87	24.382	17.3181	64.2592	21.8755	7.7476	30.7624	7.9754	11.1656	3.418	16.8623	#REF!	10.7099	5.241	27.5722	20.5082	93.6543
	10725	57700	936	6	Lobule 6 of the cerebellar vermis molecular layer	6Cb-mo	6Cb	57700	3.04988	25.5748	3.28	23.6075	17.7056	70.8225	23.2796	9.8365	32.1324	10.4922	9.5086	3.9346	16.722	#REF!	15.4104	6.5576	32.4603	28.1978	92.7905
	10723	57900	936	6	Lobule 6 of the cerebellar vermis granular layer	6Cb-gr	6Cb	57900	1.3386	20.9174	5.23	26.1467	16.4351	49.3052	18.6762	2.9882	27.6408	2.2411	14.941	2.2411	17.1821	#REF!	0	2.2411	16.4351	2.9882	95.6223
	944	58000	645	3	Lobule 7 of the cerebellar vermis	7Cb	VERM	58000	0.9226	11.9228	10.84	18.4262	10.8389	7.5873	5.4195	0	18.4262	0	10.8389	0	13.0067	#REF!	0	0	0	0	79.1242
	10728	58100	944	6	Lobule 7 of the cerebellar vermis molecular layer	7Cb-mo	7Cb	58100	0.57708	13.8629	12.13	17.3286	8.6643	8.6643	8.6643	0	12.13	0	13.8629	0	17.3286	#REF!	0	0	0	0	86.6431
	10726	58300	944	6	Lobule 7 of the cerebellar vermis granular layer	7Cb-gr	7Cb	58300	0.34552	8.68257	8.68	20.2593	14.4709	5.7884	0	0	28.9419	0	5.7884	0	5.7884	#REF!	0	0	0	0	66.5663
	951	58400	645	3	Lobule 8 of the cerebellar vermis	8Cb	VERM	58400	1.33428	51.7133	44.97	87.6877	16.4883	7.4947	0.7495	0	76.4457	0	29.2292	0	123.662	#REF!	0	0	0	0	83.1909
	10731	58500	951	6	Lobule 8 of the cerebellar vermis molecular layer	8Cb-mo	8Cb	58500	0.74548	61.7052	52.32	123.41	9.3899	5.3657	1.3414	0	92.5578	0	24.1455	0	119.386	#REF!	0	0	0	0	85.8507
	10729	58700	951	6	Lobule 8 of the cerebellar vermis granular layer	8Cb-gr	8Cb	58700	0.5888	39.0625	35.67	42.4592	25.4755	10.1902	0	0	56.0462	0	35.6658	0	129.076	#REF!	0	0	0	0	79.8234
	957	58800	645	3	Lobule 9 of the cerebellar vermis	9Cb	VERM	58800	2.22572	39.0885	64.25	153.658	19.3196	12.1309	4.9422	4.0436	34.5955	1.7972	33.697	4.4929	132.991	#REF!	0	0	2.6958	0.4493	194.544
	10734	58900	957	6	Lobule 9 of the cerebellar vermis molecular layer	9Cb-mo	9Cb	58900	1.2084	33.9292	61.24	134.889	18.2059	16.5508	3.3102	4.1377	32.2741	1.6551	28.9639	4.9652	124.131	#REF!	0	0	4.9652	0	285.502
	10732	59100	957	6	Lobule 9 of the cerebellar vermis granular layer	9Cb-gr	9Cb	59100	1.01732	45.2168	67.83	175.952	20.6425	6.8808	6.8808	3.9319	37.353	1.9659	39.319	3.9319	143.514	#REF!	0	0	0	0.983	86.5018
	968	59200	645	3	Lobule 10 of the cerebellar vermis	10Cb	VERM	59200	1.38316	97.6026	76.64	175.685	70.8523	129.414	49.8858	91.8187	54.9466	22.4124	98.3256	88.2038	108.447	#REF!	23.8584	16.6286	57.8386	80.974	326.788
	10737	59300	968	6	Lobule 10 of the cerebellar vermis molecular layer	10Cb-mo	10Cb	59300	0.68824	100.256	84.27	183.076	71.1961	177.264	50.8544	122.05	52.3073	23.2477	85.7259	79.914	135.127	#REF!	39.2305	21.7947	68.2901	87.1789	302.22
	10735	59500	968	6	Lobule 10 of the cerebellar vermis granular layer	10Cb-gr	10Cb	59500	0.69492	94.975	69.07	168.365	70.5117	82.0238	48.9265	61.8776	57.5606	21.5852	110.804	96.414	82.0238	#REF!	8.6341	11.5121	47.4875	74.8288	351.12
	1073	59600	528	2	Hemispheric regions	HEM	CBX	59600	30.7384	18.1206	21.02	36.6967	25.7333	51.922	10.5731	15.1276	15.9084	9.2718	10.5731	38.0631	33.1181	#REF!	26.2538	25.0826	45.2203	39.7223	92.3274
	1007	59700	1073	3	Simple lobule	Sim	HEM	59700	5.34308	22.459	5.61	39.6775	19.4644	58.7676	21.8975	36.683	18.1543	26.3893	17.0314	44.5436	27.8865	#REF!	29.9453	29.7581	27.8865	40.9876	96.3864
	10674	59800	1007	6	Simple lobule molecular layer	Sim-mo	Sim	59800	3.44184	23.8245	6.68	39.5137	21.2096	88.3248	24.4056	36.0272	20.919	32.8313	19.4663	48.8111	31.3786	#REF!	44.1624	40.3854	41.257	57.2368	136.845
	10672	60000	1007	6	Simple lobule granular layer	Sim-gr	Sim	60000	1.90124	19.987	3.68	39.9739	16.3051	5.2597	17.3571	37.87	13.1493	14.7272	12.6233	36.8181	21.5649	#REF!	4.2078	10.5195	3.6818	11.5714	23.1428
	1056	60200	1073	3	Crus 1 of the ansiform lobule	Crus1	HEM	60200	5.30696	22.0465	0	52.1956	28.4532	37.4979	22.8002	13.0018	32.7871	20.1622	23.3655	48.0501	34.483	#REF!	27.3226	26.7573	34.483	41.455	54.4568
	10677	60300	1056	6	Crus 1 of the ansiform lobule molecular layer	Crus1-mo	Crus1	60300	3.7936	27.151	0	64.8461	31.3686	47.4483	30.5778	15.2889	36.6407	26.3602	25.833	52.7204	43.4943	#REF!	36.6407	34.2682	46.9211	52.7204	67.4821
	10675	60500	1056	6	Crus 1 of the ansiform lobule granular layer	Crus1-gr	Crus1	60500	1.51336	9.25094	0	20.4842	21.145	12.5548	3.3039	7.2686	23.1273	4.6255	17.1803	36.343	11.8941	#REF!	3.9647	7.9294	3.3039	13.2156	21.8058
	1064	60600	1073	3	Crus 2 of the ansiform lobule	Crus2	HEM	60600	6.16368	2.92033	0.32	22.227	2.4336	19.1444	1.7846	0.9734	6.6519	0.4867	4.705	9.7344	9.41	#REF!	4.2183	7.3008	15.0884	7.6253	36.1797
	10680	60700	1064	6	Crus 2 of the ansiform lobule molecular layer	Crus2-mo	Crus2	60700	4.41772	2.94269	0.45	23.9943	2.7163	25.5788	1.5845	1.1318	7.2436	0.6791	5.8854	8.6017	10.1862	#REF!	5.8854	8.6017	17.6562	8.149	38.0287
	10678	60900	1064	6	Crus 2 of the ansiform lobule granular layer	Crus2-gr	Crus2	60900	1.74596	2.86375	0	17.7553	1.7183	2.8638	2.291	0.5728	5.1548	0	1.7183	12.6005	7.4458	#REF!	0	4.0093	8.5913	6.3003	31.5013
	1025	61000	1073	3	Paramedian lobule	PM	HEM	61000	4.81868	1.24515	4.57	17.8472	2.4903	18.2623	2.9054	2.0753	2.0753	0.2075	0.8301	1.0376	4.7731	#REF!	1.2452	3.5279	5.1881	2.4903	45.4481
	10683	61100	1025	6	Paramedian lobule molecular layer	PM-mo	PM	61100	3.30296	0.605517	5.75	16.0462	1.8166	23.0097	1.8166	3.0276	2.7248	0.3028	0.6055	0.9083	4.2386	#REF!	1.8166	4.2386	6.0552	2.7248	50.258
	10681	61300	1025	6	Paramedian lobule granular layer	PM-gr	PM	61300	1.51572	2.63901	1.98	21.7718	3.9585	7.917	5.278	0	0.6598	0	1.3195	1.3195	5.9378	#REF!	0	1.9793	3.2988	1.9793	34.9669
	1033	61400	1073	3	Copula of the pyramis	Cop	HEM	61400	2.02932	6.89886	23.16	14.7833	13.3049	52.727	1.4783	4.9278	11.3338	0.9856	3.9422	3.9422	89.6852	#REF!	8.3772	3.4494	14.2905	5.4205	114.817
	10686	61500	1033	6	Copula of the pyramis molecular layer	Cop-mo	Cop	61500	1.29136	4.64626	20.91	12.39	13.9388	50.3345	2.3231	5.4206	9.2925	0.7744	1.5488	0.7744	70.4683	#REF!	5.4206	3.0975	6.9694	1.5488	116.931
	10684	61700	1033	6	Copula of the pyramis granular layer	Cop-gr	Cop	61700	0.73796	10.8407	27.1	18.9712	12.1958	56.9137	0	4.0653	14.906	1.3551	8.1305	9.4856	123.313	#REF!	13.5509	4.0653	27.1017	12.1958	111.117
	1041	61800	1073	3	Paraflocculus	PFl	HEM	61800	5.76744	43.3468	76.81	38.6653	74.2097	83.5726	10.0565	23.2339	21.8468	3.8145	10.0565	73.6895	32.0766	#REF!	52.5363	44.3871	122.238	84.9597	164.024
	10689	61900	1041	6	Paraflocculus molecular layer	PFl-mo	PFl	61900	3.05292	42.5822	90.73	43.5648	79.2684	116.61	12.1195	28.4973	15.0675	4.9133	15.3951	94.3359	36.6862	#REF!	57.9773	68.459	132.66	136.263	230.927
	10687	62100	1041	6	Paraflocculus granular layer	PFl-gr	PFl	62100	2.71452	44.2067	61.15	33.155	68.5204	46.417	7.7362	17.3143	29.4711	2.5787	4.0523	50.4693	26.8924	#REF!	46.417	17.3143	110.517	27.2608	88.7818
	1049	62200	1073	3	Flocculus	Fl	HEM	62200	1.30928	24.4409	77.91	124.496	41.244	219.968	0.7638	30.5511	13.748	6.874	8.4016	136.716	181.779	#REF!	114.567	110.748	157.338	169.559	315.44
	10692	62300	1049	6	Flocculus molecular layer	Fl-mo	Fl	62300	0.71344	40.6481	79.89	134.559	39.2465	227.069	1.4017	35.0415	14.0166	11.2133	11.2133	158.387	162.593	#REF!	142.969	152.781	182.216	236.881	367.235
	10690	62500	1049	6	Flocculus granular layer	Fl-gr	Fl	62500	0.59584	5.03491	75.52	112.446	43.6359	211.466	0	25.1745	13.4264	1.6783	5.0349	110.768	204.753	#REF!	80.5585	60.4189	127.551	88.9501	253.424
	519	62900	512	1	Cerebellar nuclei	CBN	CB	62900	1.8544	98.6842	22.11	54.4651	119.715	93.8309	66.3287	161.238	100.841	90.0561	98.145	138.589	128.883	#REF!	38.8266	14.56	92.2131	89.5168	91.6739
	989	63000	519	2	Medial cerebellar nucleus	Med	CBN	63000	0.50356	309.794	49.65	103.265	236.317	131.067	144.968	176.742	202.558	158.869	190.643	236.317	228.374	#REF!	77.4486	15.8869	81.4203	115.18	156.883
	2244	63010	989	3	Medial cerebellar nucleus dorsolateral protuberance	MedDL	Med	63010	0.13952	57.3394	114.68	114.679	107.511	7.1674	193.521	243.693	164.851	200.688	28.6697	143.349	222.19	#REF!	7.1674	0	0	0	50.172
	2245	63020	989	3	Medial cerebellar nucleus lateral part	MedL	Med	63020	0.04344	345.304	46.04	0	207.182	0	69.0608	184.162	161.142	46.0405	345.304	391.344	207.182	#REF!	0	0	23.0203	92.081	368.324
	91	63100	519	2	Interposed cerebellar nucleus	Int	CBN	63100	0.93036	29.021	17.2	41.9193	109.635	102.111	53.7426	221.42	90.2876	93.5122	85.9882	148.33	110.71	#REF!	29.021	18.2725	124.683	85.9882	67.7157
	2239	63110	91	3	Interposed cerebellar nucleus anterior part	IntA	Int	63110	0.39124	7.66793	0	17.8918	63.8994	2.556	15.3359	214.702	81.7912	69.0113	58.7874	191.698	155.915	#REF!	2.556	0	25.5598	2.556	25.5598
	2240	63120	91	3	Interposed cerebellar nucleus dorsolateral hump	IntDL	Int	63120	0.08928	0	0	11.2007	22.4014	0	11.2007	0	0	0	11.2007	11.2007	0	#REF!	11.2007	0	0	22.4014	11.2007
	2241	63130	91	3	Interposed cerebellar nucleus posterior part	IntP	Int	63130	0.36864	27.1267	32.55	84.0929	168.186	127.496	92.2309	257.704	122.07	138.346	113.932	138.346	86.8056	#REF!	43.4028	5.4253	179.036	97.6563	103.082
	2242	63140	91	3	Interposed cerebellar nucleus posterior parvicellular	IntPPC	Int	63140	0.0812	172.414	49.26	0	160.099	578.818	110.837	332.512	86.2069	110.837	172.414	135.468	123.153	#REF!	110.837	184.729	492.611	504.926	172.414
	2281	63200	519	2	Dentate nucleus	DN	CBN	63200	0.42048	0	0	23.7823	2.3782	30.917	0	9.5129	2.3782	0	14.2694	0	49.9429	#REF!	14.2694	4.7565	33.2953	66.5906	66.5906
	846	63210	2281	3	Lateral (dentate) cerebellar nucleus	Lat	DN	63210	0.36652	0	0	27.2836	2.7284	16.3702	0	8.1851	2.7284	0	13.6418	0	51.8389	#REF!	10.9135	5.4567	10.9135	32.7404	46.3822
	2247	63220	2281	3	Lateral cerebellar nucleus parvicellular part	LatPC	DN	63220	0.05396	0	0	0	0	129.726	0	18.5322	0	0	18.5322	0	37.0645	#REF!	37.0645	0	185.322	296.516	203.855
	343	63300	8	A	Brain stem	BS	grey	63300	112.715	292.941	359.26	290.333	276.049	436.968	205.473	271.259	228.647	241.582	341.276	410.104	305.229	#REF!	169.276	162.4	295.505	250.534	441.608
	1129	63400	343	1	Interbrain	IB	BS	63400	36.5486	583.033	723.09	483.904	500.841	752.533	334.541	368.852	422.288	472.604	567.3	721.779	570.419	#REF!	368.277	353.201	608.478	543.742	751.028
	549	63500	1129	2	Thalamus	TH	IB	63500	20.4678	347.765	433.22	284.104	310.047	211.258	204.223	236.224	228.456	229.726	308.875	398.625	299.836	#REF!	152.776	131.572	354.556	289.576	558.73
	2414	63510	549	3	Periventricular gray	PVG	TH	63510	0.30148	613.639	689.93	384.769	464.376	796.073	477.644	378.135	480.961	281.942	547.3	762.903	616.956	#REF!	159.214	335.014	616.956	431.206	825.925
	864	63600	549	3	Thalamus sensory-motor cortex related	DORsm	TH	63600	7.15016	133.424	163.21	128.249	133.144	120.557	59.8588	101.117	68.9495	80.1381	121.116	151.605	104.054	#REF!	47.1318	41.2578	88.9491	76.6416	254.54
	2115	63610	864	4	Ethmoid thalamic nucleus	Eth	DORsm	63610	0.08156	0	0	24.5218	85.8264	36.7827	12.2609	12.2609	0	0	85.8264	49.0436	36.7827	#REF!	24.5218	36.7827	110.348	98.0873	392.349
	2116	63620	864	4	Retroethmoid nucleus	REth	DORsm	63620	0.05072	0	39.43	98.5804	39.4322	315.457	0	39.4322	0	0	39.4322	216.877	39.4322	#REF!	78.8644	19.7161	197.161	118.296	295.741
	2117	63630	864	4	Scaphoid thalamic nucleus	Sc	DORsm	63630	0.00808	0	123.76	0	0	0	0	0	0	0	0	123.762	0	#REF!	0	0	123.762	0	618.812
	2120	63640	864	4	Posterior intralaminar thalamic nucleus	PIL	DORsm	63640	0.12496	56.0179	64.02	80.0256	56.0179	160.051	16.0051	80.0256	72.023	40.0128	128.041	256.082	168.054	#REF!	176.056	128.041	216.069	104.033	400.128
	637	63700	864	4	Ventral group thalamic nucleus	VENT	DORsm	63700	5.0668	142.694	145.46	115.655	127.497	72.0376	62.5641	94.1423	76.3796	84.0767	113.287	127.891	97.3001	#REF!	11.6444	17.7627	38.0911	39.8674	191.837
	629	63800	637	5	Ventrolateral thalamic nucleus	VL	VENT	63800	1.10692	209.591	165.32	70.4658	119.25	15.3579	43.3636	48.784	44.267	39.7499	98.4714	113.829	64.1419	#REF!	15.3579	17.1647	38.8465	20.7784	204.17
	2316	63810	637	5	Ventral anterior thalamic nucleus	VA	VENT	63810	0.20748	236.167	106.03	53.0172	81.9356	33.7382	53.0172	72.2961	53.0172	14.4592	154.232	226.528	115.674	#REF!	9.6395	53.0172	53.0172	33.7382	197.609
	685	63900	637	5	Ventromedial thalamic nucleus	VM	VENT	63900	0.93024	408.497	396.67	385.922	340.772	282.723	247.248	361.197	293.473	360.122	392.372	392.372	370.872	#REF!	13.9749	35.4747	69.8744	70.9494	187.048
	709	64000	637	5	Ventral posterior thalamic nucleus	VP	VENT	64000	2.82216	21.969	57.76	48.8987	63.7809	27.6384	9.9215	25.5124	19.1343	15.5909	24.095	38.9772	18.7799	#REF!	9.5671	9.5671	26.2211	37.5599	188.154
	718	64100	709	6	Ventral posterolateral thalamic nucleus	VPL	VP	64100	0.67832	4.42269	11.79	25.0619	30.9588	22.1135	1.4742	8.8454	10.3196	2.9485	10.3196	10.3196	4.4227	#REF!	8.8454	8.8454	28.0104	35.3815	128.258
	733	64200	709	6	Ventral posteromedial thalamic nucleus	VPM	VP	64200	1.9046	4.7254	48.3	42.0036	60.9052	23.102	2.1002	11.551	3.1503	0.525	7.3506	22.5769	6.3005	#REF!	7.3506	8.9258	17.3265	37.2782	182.715
	2362	64210	733	7	Ventral posteromedial nucleus of the thalamus dorsal part	VPMd	VPM	64210	0.41976	0	38.12	57.1755	107.204	0	0	14.2939	2.3823	2.3823	4.7646	7.1469	4.7646	#REF!	11.9116	9.5293	9.5293	21.4408	192.967
	2363	64220	733	7	Ventral posteromedial nucleus of the thalamus ventral part	VPMv	VPM	64220	0.35988	5.55741	72.25	33.3444	44.4593	11.1148	0	0	2.7787	0	8.3361	22.2296	2.7787	#REF!	5.5574	5.5574	13.8935	44.4593	108.37
	2361	64230	709	6	Ventral posterior nucleus of the thalamus parvicellular	VPPC	VP	64230	0.23924	208.995	263.33	171.376	179.736	79.4182	96.1378	183.916	171.376	171.376	196.455	250.794	158.836	#REF!	29.2593	16.7196	91.9579	45.9789	401.271
	406	64500	864	4	Subparafascicular thalamic nucleus	SPF	DORsm	64500	0.08244	582.242	460.94	473.071	388.161	921.883	400.291	557.982	363.901	448.811	739.932	570.112	448.811	#REF!	363.901	363.901	594.372	521.591	1018.92
	422	64700	406	5	Subparafascicular thalamic nucleus parvicellular part	SPFPC	SPF	64700	0.04244	23.5627	47.13	94.2507	141.376	282.752	0	23.5627	47.1254	70.688	23.5627	70.688	0	#REF!	0	23.5627	0	141.376	235.627
	1044	64900	864	4	Peripeduncular nucleus	PP	DORsm	64900	0.0956	31.3808	135.98	209.205	83.682	52.3013	10.4603	125.523	0	10.4603	52.3013	167.364	115.063	#REF!	125.523	62.7615	135.983	156.904	366.109
	2158	64910	864	4	Subbrachial nucleus	SubB	DORsm	64910	0.28132	330.584	159.96	259.491	220.39	664.723	145.742	323.475	81.7574	174.179	291.483	490.545	245.272	#REF!	454.998	316.366	568.747	291.483	703.825
	1008	65000	864	4	Geniculate group of the thalamus	GENd	DORsm	65000	1.35868	58.8807	237.73	133.953	138.37	139.842	24.2883	61.8247	32.3844	40.4805	87.585	137.634	79.4889	#REF!	58.8807	44.1605	128.065	131.745	315.748
	475	65100	1008	5	Medial geniculate nucleus	MG	GENd	65100	0.62132	82.0833	146.46	104.616	96.5686	217.279	41.8464	103.007	46.6748	77.2549	167.386	201.185	123.93	#REF!	109.444	85.3023	180.261	196.356	354.085
	1072	65200	475	6	Medial geniculate nucleus dorsal part	MGD	MG	65200	0.09916	50.4236	60.51	60.5083	90.7624	211.779	10.0847	90.7624	90.7624	0	121.016	201.694	211.779	#REF!	0	0	252.118	272.287	373.134
	1079	65300	475	6	Medial geniculate nucleus ventral part	MGV	MG	65300	0.31464	50.8518	120.77	82.6341	88.9906	133.486	34.9606	76.2777	34.9606	92.1688	143.021	123.951	25.4259	#REF!	25.4259	22.2476	82.6341	85.8124	260.615
	1088	65400	475	6	Medial geniculate nucleus medial part	MGM	MG	65400	0.05972	133.958	167.45	133.958	66.9792	267.917	0	33.4896	0	0	0	117.214	267.917	#REF!	284.662	184.193	284.662	418.62	552.579
	2126	65410	475	6	Marginal zone of the medial geniculate	MZMG	MG	65410	0.11424	87.535	210.08	148.81	78.7815	411.415	52.521	140.056	35.014	131.303	280.112	341.387	192.577	#REF!	210.084	148.81	280.112	236.345	463.936
	170	65500	1008	5	Dorsal lateral geniculate nucleus	DLG	GENd	65500	0.73736	39.3295	314.64	158.674	173.592	74.5904	9.4933	27.1238	20.3428	9.4933	20.3428	84.0838	42.0419	#REF!	16.2743	9.4933	84.0838	77.3028	283.444
	856	65600	549	3	Thalamus polymodal association cortex related	DORpm	TH	65600	12.9992	459.028	575.8	367.33	403.871	247.477	277.479	306.788	310.481	309.865	406.717	526.032	399.948	#REF!	210.936	176.703	494.8	403.64	719.813
	138	65700	856	4	Lateral group of the dorsal thalamus	LAT	DORpm	65700	3.08472	182.513	233.41	146.529	236.65	99.1986	63.8632	98.2261	86.2315	51.2202	118.325	208.447	134.21	#REF!	55.1104	50.896	200.991	188.348	445.745
	218	65800	138	4	Lateral posterior thalamic nucleus	LP	LAT	65800	1.07692	192.215	403	185.715	330.572	129.072	97.5003	190.358	195.929	93.786	185.715	345.43	259.072	#REF!	37.143	67.7859	298.072	297.144	572.002
	2069	65810	218	6	Lateral posterior thalamic nucleus mediorostral part	LPMR	LP	65810	0.5944	292.732	531.63	227.12	410.498	200.202	168.237	316.285	319.65	163.19	292.732	504.711	386.945	#REF!	42.0592	111.036	460.969	434.051	775.572
	2070	65820	218	6	Lateral posterior thalamic nucleus mediocaudal part	LPMC	LP	65820	0.07284	109.83	219.66	96.101	151.016	96.101	0	13.7287	0	0	27.4574	137.287	68.6436	#REF!	54.9149	13.7287	219.66	260.846	645.25
	2071	65830	218	6	Lateral posterior thalamic nucleus laterorostral part	LPLR	LP	65830	0.38248	57.5193	256.22	141.184	243.15	23.5306	13.0726	39.2177	52.2903	10.4581	60.1339	138.569	107.195	#REF!	23.5306	13.0726	57.5193	104.581	264.066
	2127	65840	218	6	Lateral posterior thalamic nucleus laterocaudal part	LPLC	LP	65840	0.0272	110.294	147.06	147.059	294.118	147.059	0	36.7647	36.7647	0	36.7647	330.882	110.294	#REF!	73.5294	36.7647	330.882	110.294	257.353
	2094	65850	138	4	Intramedullary thalamic area	IMA	LAT	65850	0.03896	128.337	256.67	102.669	256.673	0	0	25.6674	51.3347	25.6674	0	102.669	25.6674	#REF!	0	0	0	51.3347	256.673
	1020	65900	138	4	Posterior thalamic nuclear group	Po	LAT	65900	1.88812	182.192	143	129.759	184.31	73.0886	45.548	46.0776	26.4814	28.5999	79.4441	123.933	64.0849	#REF!	59.8479	33.3665	111.222	93.744	332.076
	2055	65910	1020	6	Angular thalamic nucleus	Ang	Po	65910	0.0516	910.853	445.74	116.279	232.558	19.3798	271.318	387.597	116.279	155.039	368.217	426.357	290.698	#REF!	19.3798	38.7597	116.279	96.8992	310.077
	2128	65920	1020	6	Posterior thalamic nuclear group triangular part	PoT	Po	65920	0.19672	76.2505	45.75	177.918	208.418	437.17	20.3335	172.834	40.6669	45.7503	177.918	386.336	223.668	#REF!	421.92	218.585	615.087	538.837	996.34
	1029	66000	138	4	Posterior limitans thalamic nucleus	PLi	LAT	66000	0.03256	61.4251	92.14	61.4251	276.413	491.401	61.4251	122.85	0	61.4251	307.125	552.826	214.988	#REF!	245.7	214.988	1259.21	1351.35	1474.2
	325	66100	138	4	Suprageniculate thalamic nucleus	SG	LAT	66100	0.04816	103.821	62.29	20.7641	145.349	269.934	83.0565	124.585	62.2924	0	103.821	311.462	124.585	#REF!	186.877	290.698	996.678	789.037	1536.54
	239	66200	856	4	Anterior group of the dorsal thalamus	ATN	DORpm	66200	2.2718	563.43	658.51	434.017	383.837	113.566	320.011	353.904	389.559	348.182	493.441	482.437	393.961	#REF!	69.5484	88.9163	274.672	246.501	519.412
	255	66300	239	5	Anteroventral thalamic nucleus	AV	ATN	66300	0.43396	705.134	647.53	417.089	414.785	55.3046	292.654	380.219	364.089	267.306	525.394	417.089	424.002	#REF!	16.1305	34.5654	78.3482	149.783	269.61
	2035	66310	255	6	Anteroventral thalamic nucleus ventrolateral part	AVVL	AV	66310	0.14344	481.037	383.44	432.236	292.805	34.8578	237.033	285.834	285.834	202.175	460.123	299.777	390.407	#REF!	27.8862	20.9147	20.9147	139.431	299.777
	2036	66320	255	6	Anterovent thalamic nucleus dorsomedial part	AVDM	AV	66320	0.09596	646.103	698.21	333.472	364.735	52.105	156.315	239.683	156.315	114.631	385.577	479.366	364.735	#REF!	0	10.421	20.842	41.684	270.946
	1096	66400	239	5	Anteromedial thalamic nucleus	AM	ATN	66400	0.46648	679.558	889.64	795.318	548.791	111.473	400.875	353.713	621.677	563.797	662.408	752.444	460.899	#REF!	42.8743	53.5929	250.815	216.515	606.671
	1104	66600	1096	6	Anteromedial thalamic nucleus ventral part	AMV	AM	66600	0.0256	742.188	742.19	664.062	351.562	78.125	351.562	390.625	976.562	507.812	820.312	429.688	507.812	#REF!	39.0625	234.375	273.438	468.75	898.438
	64	66700	239	5	Anterodorsal thalamic nucleus	AD	ATN	66700	0.19764	602.105	925.93	586.926	425.015	177.09	500.911	349.12	470.553	435.135	490.791	617.284	495.851	#REF!	65.7762	258.045	480.672	455.373	480.672
	1120	66800	239	5	Interanteromedial thalamic nucleus	IAM	ATN	66800	0.0858	1188.81	1048.95	431.235	641.026	407.925	547.785	617.716	780.886	792.541	792.541	850.816	606.061	#REF!	442.89	256.41	1270.4	792.541	1969.7
	1113	66900	239	5	Interanterodorsal thalamic nucleus	IAD	ATN	66900	0.09776	797.872	1033.14	664.894	716.039	634.206	634.206	746.727	685.352	705.81	808.101	889.934	562.602	#REF!	613.748	327.332	1708.27	1513.91	2127.66
	2282	67000	239	5	Lateral dorsal nucleus of thalamus	LD	ATN	67000	0.99016	361.558	430.23	218.147	229.256	50.4969	207.037	281.773	212.087	190.878	343.379	284.803	293.892	#REF!	20.1988	57.5665	103.014	88.8745	311.061
	155	67010	2282	6	Laterodorsal thalamic nucleus ventrolateral part	LDVL	LD	67010	0.60008	278.296	276.63	193.308	163.312	44.994	118.318	159.979	101.653	81.6558	216.638	156.646	181.642	#REF!	16.6644	29.996	49.9933	56.6591	348.287
	2046	67020	2282	6	Laterodorsal thalamic nucleus dorsomedial part	LDDM	LD	67020	0.39008	489.643	666.53	256.358	330.701	58.9623	343.519	469.135	381.973	358.901	538.351	481.952	466.571	#REF!	25.6358	99.9795	184.577	138.433	253.794
	444	67100	856	4	Medial group of the dorsal thalamus	MED	DORpm	67100	1.58772	631.723	857.83	545.436	519.613	157.458	445.923	483.083	561.812	552.994	664.475	923.337	658.806	#REF!	287.834	195.249	695.337	547.326	889.955
	59	67200	444	5	Intermediodorsal thalamic nucleus	IMD	MED	67200	0.10964	747.902	939.44	346.589	529.004	200.657	364.83	373.951	501.642	574.608	747.902	966.8	611.091	#REF!	492.521	410.434	1614.37	1450.2	1614.37
	2091	67210	444	5	Posteromedian thalamic nucleus	PoMn	MED	67210	0.0228	43.8596	43.86	43.8596	131.579	263.158	87.7193	43.8596	175.439	87.7193	350.877	394.737	175.439	#REF!	1096.49	614.035	2192.98	1885.96	2149.12
	362	67300	444	5	Mediodorsal thalamic nucleus	MD	MED	67300	1.15684	448.636	746	396.771	395.906	159.918	460.738	470.247	640.538	517.79	649.182	831.576	646.589	#REF!	305.142	203.14	741.676	565.333	942.222
	617	67400	362	6	Mediodorsal thalamic nucleus central part	MDC	MD	67400	0.19568	398.61	725.67	250.409	209.526	40.8831	536.59	393.5	746.116	582.584	684.792	965.863	751.226	#REF!	86.8765	71.5454	659.24	291.292	853.434
	626	67500	362	6	Mediodorsal thalamic nucleus lateral part	MDL	MD	67500	0.34368	386.988	683.78	372.44	378.259	84.3808	413.175	497.556	538.291	459.73	611.034	654.679	465.549	#REF!	84.3808	101.839	421.904	299.697	797.253
	636	67600	362	6	Mediodorsal thalamic nucleus medial part	MDM	MD	67600	0.46304	496.717	792.59	460.003	488.079	53.991	427.609	466.482	606.859	531.272	645.733	904.889	691.085	#REF!	248.359	146.856	678.127	472.961	891.932
	366	67700	444	5	Submedius thalamic nucleus	Sub	MED	67700	0.29844	1343.65	1323.55	1233.08	1025.33	123.978	445.651	606.487	308.27	717.062	717.062	1303.44	760.622	#REF!	83.7689	53.6121	63.6644	43.5598	325.024
	2377	67710	366	6	Submedius thalamic nucleus dorsal part	SubD	Sub	67710	0.08844	1515.15	1526.46	1266.4	1051.56	11.3071	271.37	542.741	180.914	576.662	576.662	1074.17	599.276	#REF!	45.2284	22.6142	22.6142	11.3071	497.512
	2378	67720	366	6	Submedius thalamic nucleus ventral part	SubV	Sub	67720	0.1442	1338.42	1269.07	1366.16	1123.44	166.435	596.394	665.742	332.871	846.047	894.591	1560.33	984.743	#REF!	104.022	83.2178	69.3481	55.4785	284.327
	571	67900	856	4	Midline group of the dorsal thalamus	MTN	DORpm	67900	1.23292	1219.87	1516.72	837.037	1046.3	824.871	682.12	737.274	669.954	971.677	954.644	1399.12	1206.08	#REF!	951.4	693.476	1468.06	1279.89	1697.6
	149	68000	571	5	Paraventricular nucleus of the thalamus	PVT	MTN	68000	0.24236	391.979	792.21	375.474	350.718	1031.52	367.222	507.51	424.988	462.123	680.805	895.362	668.427	#REF!	2582.93	1638.06	2574.68	2669.58	2974.91
	2089	68010	149	6	Paraventricular thalamic nucleus anterior part	PV	PVT	68010	0.15692	439.715	994.14	395.106	395.106	968.646	471.578	669.131	573.541	624.522	866.684	1102.47	841.193	#REF!	3167.22	1892.68	2733.88	2893.19	3288.3
	2090	68020	149	6	Paraventricular thalamic nucleus posterior part	PVP	PVT	68020	0.08544	304.307	421.35	339.42	269.195	1147	175.562	210.674	152.154	163.858	339.42	514.981	351.124	#REF!	1509.83	1170.41	2282.3	2258.9	2399.34
	15	68100	571	5	Parataenial thalamic nucleus	PT	MTN	68100	0.14432	796.84	1191.8	450.388	602.827	769.124	478.104	464.246	706.763	949.279	637.472	900.776	983.925	#REF!	422.672	575.111	1697.62	1441.24	1676.83
	2038	68110	571	6	Xiphoid thalamic nucleus	Xi	PT	68110	0.19472	1324.98	1776.91	1109.29	1350.66	1063.06	821.693	996.302	806.286	1407.15	1453.37	1992.6	1561.22	#REF!	641.947	647.083	1309.57	1114.42	1689.61
	2039	68120	2038	7	Paraxiphoid nucleus of thalamus	PaXi	Xi	68120	0.15036	1237.03	1702.58	1110.67	1356.74	904.496	751.53	971.003	837.989	1376.7	1536.31	1928.7	1509.71	#REF!	485.502	591.913	977.654	931.099	1589.52
	2032	68130	571	5	Accessory neuosecretory nuclei	ANS	MTN	68130	0.01852	485.961	755.94	539.957	269.978	377.97	701.944	431.965	485.961	1025.92	647.948	809.935	485.961	#REF!	215.983	53.9957	593.952	107.991	269.978
	181	68200	571	5	Reuniens area	RE	MTN	68200	0.59708	1661.42	1822.2	1030.01	1334.83	728.546	782.14	832.384	708.448	1040.06	968.044	1565.95	1385.07	#REF!	571.113	398.607	1095.33	795.538	1276.21
	2092	68210	181	6	Reuniens thalamic nucleus	Re	RE	68210	0.3724	1793.77	2078.41	1090.23	1498.39	773.362	733.083	776.047	698.174	1074.11	926.423	1541.35	1382.92	#REF!	671.321	464.554	1337.27	942.535	1291.62
	2093	68220	181	6	Retrouniens area	RRe	RE	68220	0.08568	1715.69	1377.22	1248.83	1143.79	875.35	676.937	793.651	606.909	548.553	1120.45	1528.94	1167.13	#REF!	501.867	256.769	711.951	513.539	1785.71
	2037	68230	181	6	Ventral reuniens thalamic nucleus	VRe	RE	68230	0.139	1273.38	1410.07	733.813	1014.39	517.986	978.417	1007.19	798.561	1251.8	985.611	1654.68	1525.18	#REF!	345.324	309.353	683.453	575.54	920.863
	51	68300	856	4	Intralaminar nuclei of the dorsal thalamus	ILM	DORpm	68300	2.06664	550.652	684.69	416.134	464.038	267.1	362.908	374.037	369.682	337.746	465.974	590.814	414.683	#REF!	203.228	176.131	636.298	469.845	1045.17
	189	68400	51	5	Rhomboid thalamic nucleus	Rh	ILM	68400	0.14976	1402.24	1295.41	888.088	981.571	100.16	327.19	480.769	287.126	574.252	687.767	981.571	607.639	#REF!	120.192	73.4509	600.962	206.998	1315.44
	599	68500	51	5	Central medial thalamic nucleus	CM	ILM	68500	0.47296	746.363	957.8	518.014	543.386	342.524	454.584	511.671	570.873	545.501	659.675	898.596	562.415	#REF!	296.008	181.834	788.65	611.045	1528.67
	907	68600	51	5	Paracentral thalamic nucleus	PC	ILM	68600	0.55364	498.519	605.09	458.782	475.038	233.003	337.765	346.796	290.803	258.291	419.045	435.301	305.252	#REF!	245.647	220.36	612.311	559.931	829.059
	2064	68610	907	6	Oval paracentral thalamic nucleus	OPC	PC	68610	0.06512	122.85	76.78	46.0688	92.1376	46.0688	92.1376	30.7125	46.0688	15.3563	92.1376	61.4251	0	#REF!	15.3563	0	30.7125	46.0688	107.494
	575	68700	51	5	Centrolateral thalamic nucleus	CL	ILM	68700	0.327	510.703	825.69	461.774	501.529	599.388	605.505	571.865	495.413	363.914	688.073	807.339	614.679	#REF!	284.404	345.566	1189.6	813.456	1590.21
	930	68800	51	5	Parafascicular thalamic nucleus	PaF	ILM	68800	0.56328	234.342	289.38	136.699	227.24	88.7658	179.307	142.025	227.24	163.329	161.554	255.645	230.791	#REF!	58.5854	56.8101	220.139	133.149	463.358
	262	68900	856	4	Reticular nucleus (prethalamus)	Rt	DORpm	68900	1.59192	108.674	79.15	93.5977	78.5215	27.6396	28.8959	40.8312	33.9213	36.434	109.302	90.4568	82.9187	#REF!	28.2678	30.7804	60.9327	69.0989	200.387
	1014	69000	856	4	Geniculate group ventral thalamus	GENv	DORpm	69000	0.51216	7.81006	48.81	70.2905	19.5251	404.171	0	13.6676	3.905	5.8575	23.4302	21.4777	13.6676	#REF!	17.5726	48.8129	210.872	290.925	318.26
	27	69100	1014	5	Intergeniculate leaflet	IGL	GENv	69100	0.06692	0	74.72	104.603	44.8296	478.183	0	0	0	0	0	14.9432	29.8864	#REF!	29.8864	29.8864	164.375	209.205	433.353
	178	69200	1014	5	Pregeniculate nucleus of the prethalamus	PrG	GENv	69200	0.3996	7.50751	45.05	47.5475	17.5175	425.425	0	17.5175	5.005	0	25.025	20.02	10.01	#REF!	17.5175	57.5576	232.733	292.793	322.823
	2072	69210	178	6	Pregeniculate nucleus magnocellular part	PrGMC	PrG	69210	0.22144	4.5159	31.61	31.6113	18.0636	559.971	0	18.0636	9.0318	0	31.6113	22.5795	4.5159	#REF!	18.0636	76.7702	302.565	401.915	410.947
	2073	69220	178	6	Pregeniculate nucleus parvicellular part	PrGPC	PrG	69220	0.13492	7.4118	59.29	66.7062	7.4118	155.648	0	0	0	0	22.2354	14.8236	7.4118	#REF!	14.8236	29.6472	81.5298	140.824	222.354
	321	69500	1014	5	Subgeniculate nucleus of the prethalamus	SubG	GENv	69500	0.04564	21.9106	43.82	219.106	0	109.553	0	0	0	65.7318	43.8212	43.8212	21.9106	#REF!	0	0	87.6424	394.391	109.553
	958	69600	856	4	Epithalamus	EPI	DORpm	69600	0.65132	463.674	723.15	604.925	674.016	895.105	518.946	552.724	532.764	374.624	644.844	816.803	554.259	#REF!	475.957	514.34	1157.65	658.662	1004.11
	483	69700	958	5	Medial habenular nucleus	MHb	EPI	69700	0.24988	600.288	760.36	892.428	924.444	516.248	428.205	448.215	424.204	328.158	724.348	680.327	500.24	#REF!	556.267	364.175	760.365	396.19	968.465
	186	69800	958	5	Lateral habenular nucleus	LHb	EPI	69800	0.40144	378.637	699.98	425.966	518.135	1130.93	575.428	617.776	600.339	403.547	595.357	901.754	587.884	#REF!	425.966	607.812	1404.94	822.041	1026.31
	2058	69810	186	6	Lateral habenular nucleus medial part	LHbM	LHb	69810	0.0756	462.963	780.42	701.058	727.513	1335.98	396.825	317.46	158.73	185.185	634.921	846.561	621.693	#REF!	370.37	952.381	1825.4	1362.43	1349.21
	2059	69820	186	6	Lateral habenular nucleus lateral part	LHbL	LHb	69820	0.13216	257.264	938.26	408.596	491.828	1074.46	559.927	499.395	438.862	295.097	438.862	1066.89	620.46	#REF!	453.995	620.46	1195.52	817.191	1082.02
	953	69900	958	5	Pineal gland	Pi	EPI	69900	0	#DIV/0!	#DIV/0!	#DIV/0!	#DIV/0!	#DIV/0!	#DIV/0!	#DIV/0!	#DIV/0!	#DIV/0!	#DIV/0!	#DIV/0!	#DIV/0!	#REF!	#DIV/0!	#DIV/0!	#DIV/0!	#DIV/0!	#DIV/0!
	1097	70000	1129	2	Hypothalamus	HY	IB	70000	16.0807	882.485	1092.05	738.213	743.686	1441.48	500.413	537.663	669	781.744	896.229	1133.1	914.822	#REF!	642.571	635.295	931.675	867.25	995.789
	157	70100	1097	3	Periventricular zone	PVZ	HY	70100	0.7472	875.268	1540.42	698.608	900.696	1618.04	440.31	548.715	631.692	724.036	985.011	1201.82	951.553	#REF!	974.304	837.794	1694.33	1502.94	1849.57
	390	70200	157	4	Supraoptic nucleus	SO	PVZ	70200	0.08028	423.518	286.5	660.189	174.39	1743.9	211.759	124.564	211.759	186.846	448.43	311.41	236.672	#REF!	984.056	685.102	847.035	1133.53	959.143
	2051	70210	390	5	Supraoptic nucleus retrochiasmatic part	SOR	SO	70210	0.01892	369.979	422.83	369.979	528.541	1744.19	211.417	422.833	475.687	687.104	1215.64	475.687	634.25	#REF!	422.833	475.687	1057.08	1321.35	581.395
	2034	70220	390	5	Episupraoptic nucleus	ESO	SO	70220	0.02588	347.759	347.76	386.399	154.56	1661.51	425.039	77.2798	309.119	38.6399	193.199	270.479	193.199	#REF!	1545.6	850.077	1043.28	1197.84	965.997
	332	70300	157	4	Accessory supraoptic group	ASO	PVZ	70300	0.0042	4047.62	2380.95	714.286	1666.67	4523.81	1666.67	1428.57	714.286	1904.76	2142.86	2380.95	2380.95	#REF!	1428.57	2619.05	1428.57	1904.76	952.381
	432	70400	332	5	Circulur nucleus	Cir	ASO	70400	0.0042	4047.62	2380.95	714.286	1666.67	4523.81	1666.67	1428.57	714.286	1904.76	2142.86	2380.95	2380.95	#REF!	1428.57	2619.05	1428.57	1904.76	952.381
	38	70500	157	4	Paraventricular hypothalamic nucleus anterior part	PVA	PVZ	70500	0.39648	728.914	1409.91	448.951	733.959	1276.23	461.562	597.76	617.938	842.413	976.09	1150.12	953.39	#REF!	943.301	966.001	2045.5	1725.18	2118.64
	71	70600	38	5	Paraventricular hypothalamic nucleus magnocellular division	PVAm	PVA	70600	0.08608	1533.46	2218.87	487.918	964.219	1881.97	604.089	871.283	906.134	1196.56	1591.54	1742.57	1254.65	#REF!	534.387	685.409	1289.5	824.814	1754.18
	79	70800	71	6	Paraventricular hypothalamic nucleus medial magnocellular part	PaMM	PVAm	70800	0.0076	1315.79	1315.79	131.579	1052.63	789.474	1052.63	1184.21	1710.53	1184.21	1184.21	1447.37	2105.26	#REF!	394.737	921.053	1315.79	526.316	1315.79
	652	71000	71	6	Paraventricular hypothalamic nucleus lateral magnocellular part	PaLM	PVAm	71000	0.03332	2551.02	2941.18	780.312	1380.55	2310.92	780.312	870.348	1110.44	1650.66	1860.74	2130.85	1590.64	#REF!	990.396	900.36	1830.73	1140.46	2280.91
typo?	660	71100	71	4	Paraventricular hypothalamic nucleus posterior part	PaPo	PVAm (PVZ?)	71100	0.04516	819.309	1837.91	332.152	642.161	1749.34	398.583	819.309	620.018	863.596	1461.47	1505.76	863.596	#REF!	221.435	487.157	885.74	642.161	1439.33
	94	71200	38	5	Paraventricular hypothalamic nucleus parvicellular division	PVAp	PVA	71200	0.088	852.273	2284.09	852.273	1295.45	1306.82	750	1000	988.636	1556.82	1795.45	2022.73	1715.91	#REF!	397.727	715.909	1000	1147.73	1522.73
	55	71300	94	5	Paraventricular hypothalamic nucleus anterior parivcellular part	PaAP	PVAp	71300	0.05068	848.461	2091.55	947.119	1420.68	1696.92	730.071	1065.51	1183.9	1637.73	1795.58	1894.24	1835.04	#REF!	532.755	907.656	947.119	1400.95	1322.02
	2026	71310	55	6	Anterior perifornical nucleus	APF	PaAP	71310	0.00488	1024.59	1229.51	409.836	1229.51	409.836	1229.51	819.672	0	819.672	1639.34	1229.51	1024.59	#REF!	204.918	614.754	0	409.836	614.754
	87	71400	94	5	Paraventricular hypothalamic nucleus medial parvicellular part	PaMP	PVAp	71400	0.03732	857.449	2545.55	723.473	1125.4	777.063	777.063	911.04	723.473	1446.95	1795.28	2197.21	1554.13	#REF!	214.362	455.52	1071.81	803.859	1795.28
	30	71600	157	4	Paraventricular hypothalamic nucleus ventral part	PaV	PVZ	71600	0.0302	761.589	2483.44	562.914	662.252	1423.84	761.589	1125.83	1688.74	2185.43	3013.24	2847.68	1721.85	#REF!	695.364	562.914	1357.62	1125.83	1423.84
	223	71800	157	4	Arcuate hypothalamic nucleus	Arc	PVZ	71800	0.23604	1232.84	2050.5	1148.11	1444.67	2122.52	419.42	521.098	660.905	499.915	902.389	1359.94	1067.62	#REF!	1050.67	677.851	1440.43	1296.39	1770.89
	2061	71810	223	5	Arcuate hypothalamic nucleus dorsal part	ArcD	Arc	71810	0.02636	1024.28	1251.9	1327.77	1631.26	2238.24	417.299	531.108	531.108	303.49	720.789	1289.83	1365.71	#REF!	1593.32	1062.22	2010.62	1593.32	1707.13
	2062	71820	223	5	Arcuate hypothalamic nucleus lateral part	ArcL	Arc	71820	0.03384	916.076	2157.21	1211.58	1182.03	2423.17	650.118	709.22	1122.93	531.915	1329.79	1034.28	1507.09	#REF!	1093.38	413.712	1211.58	1211.58	1477.54
	2104	71830	223	5	Arcuate hypothalamic nucleus lateroposterior part	ArcLP	Arc	71830	0.03292	820.17	1366.95	729.04	1306.2	1640.34	486.027	789.793	425.273	546.78	972.053	1731.47	880.923	#REF!	668.287	972.053	941.677	1063.18	2308.63
	2095	71840	223	5	Arcuate hypothalamic nucleus medial part	ArcM	Arc	71840	0.0128	1640.62	2500	1718.75	2031.25	1328.12	625	859.375	1562.5	781.25	2031.25	1328.12	1406.25	#REF!	859.375	390.625	1093.75	234.375	390.625
	2103	71850	223	5	Arcuate hypothalamic nucleus medial posterior part	ArcMP	Arc	71850	0.0604	1076.16	2019.87	1390.73	1539.74	2102.65	231.788	331.126	397.351	298.013	728.477	1423.84	877.483	#REF!	1192.05	596.027	1473.51	976.821	1672.19
	141	71900	1097	3	Periventricular region	PVR	HY	71900	2.63232	1386.61	1694.7	1040.15	1232.75	1998.24	1004.06	901.486	1103.59	1399.53	1559.08	1690.52	1512.35	#REF!	969.107	1007.1	1591.37	1333.8	1450.43
	272	72300	141	4	Anteroventral periventricular nucleus	AVPe	PVR	72300	0.0758	1886.54	1965.7	1424.8	1939.31	2216.36	1385.22	1226.91	778.364	1187.34	1160.95	1147.76	1279.68	#REF!	1596.31	1517.15	2440.63	2124.01	1583.11
	668	72350	141	4	Dorsal hypothalamic area	DA	PVR	72350	0.12968	1156.69	1141.27	632.326	994.756	1657.93	578.347	570.635	848.242	1118.14	1873.84	2375.08	1642.5	#REF!	339.297	555.213	1002.47	562.924	1041.02
typo?	830	72400	141	5	Dorsomedial hypothalamic nucleus	DM	DA	72400	0.562	1418.15	1695.73	955.516	1085.41	2487.54	661.922	676.157	1131.67	1099.64	1597.86	1791.81	1491.1	#REF!	1220.64	1033.81	1903.91	1323.84	2135.23
	2076	72500	830	6	Dorsomedial hypothalamic nucleus dorsal part	DMD	DM	72500	0.0862	1252.9	1194.9	858.469	962.877	2656.61	394.432	487.239	1194.9	1194.9	1194.9	1438.52	1264.5	#REF!	928.074	1276.1	2053.36	986.079	1403.71
	2077	72600	830	6	Dorsomedial hypothalamic nucleus compact part	DMC	DM	72600	0.04684	1921.43	2220.32	1537.15	1771.99	2903.5	1131.51	789.923	1729.29	1515.8	1643.89	2348.42	1857.39	#REF!	1985.48	1921.43	3287.79	2198.98	2625.96
	2078	72700	830	6	Dorsomedial hypothalamic nucleus ventral part	DMV	DM	72700	0.1444	1717.45	1662.05	955.679	1322.71	2271.47	782.548	713.296	1433.52	1308.86	1925.21	2236.84	2160.66	#REF!	1260.39	858.726	2008.31	1530.47	2555.4
	452	72800	141	4	Median preoptic nucleus	MnPO	PVR	72800	0.0424	1603.77	1886.79	1367.92	1438.68	471.698	1415.09	896.226	943.396	1273.58	1603.77	896.226	825.472	#REF!	117.924	400.943	566.038	259.434	1438.68
	2307	72810	141	4	DA14 Dopamine Cells	DA14	PVR	72810	0	#DIV/0!	#DIV/0!	#DIV/0!	#DIV/0!	#DIV/0!	#DIV/0!	#DIV/0!	#DIV/0!	#DIV/0!	#DIV/0!	#DIV/0!	#DIV/0!	#REF!	#DIV/0!	#DIV/0!	#DIV/0!	#DIV/0!	#DIV/0!
	523	72900	141	4	Medial preoptic area	MPA	PVR	72900	1.21872	1406.39	1791.22	1096.23	1306.29	2030	1289.88	1150.39	1257.88	1714.91	1718.2	1741.17	1595.12	#REF!	978.896	1182.39	1619.73	1472.86	1372.75
	2016	72910	523	5	Strial part of the preoptic area	StA	MPA	72910	0.03184	1947.24	2543.97	1570.35	1633.17	1413.32	753.769	1319.1	1664.57	2010.05	1884.42	2575.38	1476.13	#REF!	282.663	628.141	628.141	1036.43	816.583
	2023	72920	523	5	Striohypothalamic nucleus	StHy	MPA	72920	0.11884	1615.62	2271.96	1152.81	1514.64	1842.81	1396.84	1287.45	1817.57	1926.96	2381.35	2406.6	2137.33	#REF!	917.2	1093.91	1102.32	1337.93	1354.76
	2306	72930	523	5	Anterior commissural nucleus	AC	MPA	72930	0.02636	1024.28	1820.94	1934.75	1631.26	1858.88	948.407	872.534	1858.88	2200.3	2010.62	2086.49	1517.45	#REF!	720.789	1365.71	1593.32	1669.2	1100.15
	763	73000	141	4	Vascular organ of the lamina terminalis	VOLT	PVR	73000	0.02092	1051.63	1338.43	956.023	908.222	1147.23	478.012	47.8011	478.012	669.216	764.818	621.415	478.012	#REF!	669.216	1099.43	956.023	525.813	1051.63
	914	73100	141	4	Posterodorsal preoptic nucleus	PDPO	PVR	73100	0.0092	760.87	1413.04	978.261	543.478	1739.13	652.174	543.478	760.87	652.174	1739.13	2500	1847.83	#REF!	0	978.261	326.087	869.565	326.087
	1109	73200	141	4	Parastrial nucleus	PS	PVR	73200	0.04452	1684.64	1999.1	1257.86	1257.86	2246.18	718.778	584.007	763.702	1864.33	1662.17	1437.56	1347.71	#REF!	134.771	988.32	965.858	1437.56	808.625
	133	73500	141	4	Periventricular hypothalamic nucleus	Pe	PVR	73500	0.23516	1228.95	1922.1	1224.7	1522.37	1394.8	918.524	782.446	1220.45	1526.62	1560.64	2066.68	1858.31	#REF!	939.786	765.436	1526.62	990.815	1233.2
	347	73600	141	4	Subparaventricular zone of the hypothalamus	SPa	PVR	73600	0.02756	1923.08	1705.37	1269.96	1669.09	3737.3	1233.67	1015.97	979.681	1342.53	1015.97	2539.91	2249.64	#REF!	907.112	399.129	2140.78	1233.67	689.405
	286	73700	141	4	Suprachiasmatic nucleus	SCh	PVR	73700	0.07348	1211.21	1020.69	707.676	1020.69	1810.02	544.366	285.792	462.711	721.285	680.457	1129.56	979.859	#REF!	653.239	666.848	1456.18	1115.95	1034.3
	2030	73710	286	5	Suprachiasmatic nucleus dorsolateral part	SChDL	SCh	73710	0.01144	874.126	1136.36	786.713	437.063	1573.43	786.713	262.238	349.65	699.301	874.126	1311.19	611.888	#REF!	437.063	437.063	1486.01	2010.49	611.888
	2031	73720	286	5	Suprachiasmatic nucleus ventromedial part	SChVM	SCh	73720	0.0078	2179.49	2051.28	641.026	1025.64	1282.05	897.436	512.821	256.41	512.821	512.821	1410.26	641.026	#REF!	512.821	384.615	1153.85	1025.64	897.436
	338	73800	141	4	Subfornical organ	SFO	PVR	73800	0.046	195.652	652.17	391.304	65.2174	456.522	456.522	695.652	369.565	434.783	543.478	434.783	695.652	#REF!	65.2174	130.435	173.913	434.783	326.087
typo	2011	73810	141	4	Ventromedidal preoptic nucleus	VMPO	PVR	73810	0.06216	1544.4	1673.1	1158.3	1142.21	2107.46	595.238	723.938	579.151	579.151	933.076	933.076	1367.44	#REF!	1287	933.076	1287	2010.94	1431.79
	689	73900	141	4	Ventrolateral preoptic nucleus	VLPO	PVR	73900	0.08472	1628.9	1298.39	790.84	861.662	1522.66	743.626	519.358	885.269	932.484	932.484	838.055	932.484	#REF!	1239.38	531.162	1499.06	1770.54	932.484
	467	74000	1097	3	Hypothalamic medial zone	MEZ	HY	74000	3.331	1283.7	1501.35	960.072	1067.25	1536.48	673.972	701.291	841.189	1056.44	1175.02	1521.46	1224.56	#REF!	833.684	754.728	1097.87	929.451	1146.2
	88	74100	467	4	Anterior hypothalamic nucleus	AHN	MEZ	74100	0.91364	1350.64	1374.72	844.972	966.464	1900.09	974.125	879.996	1029.95	1360.49	1465.57	1863.97	1556.41	#REF!	692.833	965.369	1420.69	1297.01	1168.95
	700	74200	88	5	Anterior hypothalamic area anterior part	AHA	AHN	74200	0.20464	952.893	904.03	625.489	703.675	1465.99	1099.49	820.954	1089.72	1163.02	1324.28	1661.45	1382.92	#REF!	449.57	889.367	928.46	1035.97	806.294
	708	74300	88	5	Anterior hypothalamic area central part	AHC	AHN	74300	0.40928	1610.14	1583.27	955.336	1026.19	2245.41	1021.31	1018.86	1043.3	1563.72	1619.92	2145.23	1695.66	#REF!	950.45	1072.62	1712.76	1551.51	1270.52
	724	74500	88	5	Anterior hypothalamic area posterior part	AHP	AHN	74500	0.16292	1473.12	1798.43	975.939	1454.7	1804.57	1068.01	988.215	969.801	1460.84	1755.46	2080.78	1988.71	#REF!	527.866	865.455	1258.29	1153.94	1448.56
	2029	74510	88	5	Lateroanterior hypothalamic nucleus	LA	AHN	74510	0.1368	1023.39	950.29	687.135	599.415	1630.12	533.626	423.977	972.222	928.363	869.883	1067.25	884.503	#REF!	482.456	877.193	1476.61	1096.49	1074.56
	2047	74520	724	6	Stigmoid hypothalamic nucleus	Stg	AHP	74520	0	#DIV/0!	#DIV/0!	#DIV/0!	#DIV/0!	#DIV/0!	#DIV/0!	#DIV/0!	#DIV/0!	#DIV/0!	#DIV/0!	#DIV/0!	#DIV/0!	#REF!	#DIV/0!	#DIV/0!	#DIV/0!	#DIV/0!	#DIV/0!
	331	74600	467	4	Mammillary body	MBO	MEZ	74600	0.50308	920.331	1079.35	733.482	602.29	1618.03	260.396	435.318	357.796	391.588	655.959	594.339	560.547	#REF!	644.033	318.041	500.914	445.257	655.959
	210	74700	331	4	Lateral mamilllary nucleus	LM	MBO	74700	0.04488	713.012	1448.31	958.111	646.168	2540.11	200.535	356.506	378.788	757.576	824.421	646.168	757.576	#REF!	668.449	467.914	490.196	646.168	557.041
	491	74800	331	4	Medial mammillary nucleus medial part	MM	MBO	74800	0.27508	821.579	785.23	661.626	461.684	1359.6	250.836	414.425	250.836	269.013	428.966	370.801	414.425	#REF!	599.826	272.648	439.872	374.437	479.86
	2118	74810	491	5	Mammillary recess of the 3rd ventricle	MRe	MM	74810	0.0028	3214.29	1785.71	714.286	2500	357.143	357.143	0	0	0	357.143	0	357.143	#REF!	2142.86	357.143	1071.43	714.286	714.286
	2119	74820	491	5	Medial mammillary nucleus lateral part	ML	MM	74820	0.09936	1086.96	956.12	593.8	543.478	1378.82	412.641	754.831	261.675	442.834	875.604	734.702	805.153	#REF!	432.77	291.868	543.478	483.092	684.38
	732	74900	491	5	Medial mammillary nucleus median part	MnM	MM	74900	0.01904	945.378	1418.07	735.294	210.084	2258.4	0	0	52.521	0	472.689	105.042	367.647	#REF!	0	0	0	52.521	52.521
	525	75000	331	4	Retromamillary nucleus	RM	MBO	75000	0.1528	1073.3	1524.87	706.806	778.796	1727.75	274.869	451.571	471.204	484.293	981.675	916.23	719.895	#REF!	536.649	333.77	477.749	353.403	798.429
	1110	75100	525	5	Retromamillary nucleus lateral part	RML	RM	75100	0.00688	1744.19	2325.58	872.093	1017.44	1453.49	436.046	436.046	872.093	1598.84	1744.19	1017.44	1308.14	#REF!	0	436.046	0	0	0
	1118	75200	525	5	Retromamillary nucleus medial part	RMM	RM	75200	0.07868	1423.49	1728.52	889.68	762.583	1576	330.452	533.808	546.518	495.679	1042.2	1169.29	775.292	#REF!	889.68	444.84	699.034	432.13	889.68
	557	75300	331	4	Tuberomammillary nucleus	TM	MBO	75300	0.03032	1352.24	956.46	1187.34	923.483	2044.85	362.797	659.631	725.594	494.723	824.538	923.483	791.557	#REF!	1550.13	428.76	1187.34	1253.3	1682.06
	1126	75400	557	5	Dorsal tuberomammillary nucleus	DTM	TM	75400	0.0072	1805.56	694.44	1250	1250	2777.78	138.889	694.444	416.667	555.556	833.333	1250	1111.11	#REF!	1388.89	277.778	2500	1944.44	1388.89
	1	75500	557	5	Ventral tuberomammillary nucleus	VTM	TM	75500	0.02312	1211.07	1038.06	1167.82	821.799	1816.61	432.526	648.789	821.799	475.779	821.799	821.799	692.042	#REF!	1600.35	475.779	778.547	1038.06	1773.36
	515	75600	467	4	Medial preoptic nucleus	MPO	MEZ	75600	0.30308	1596.94	2062.16	1276.89	1851	2296.42	1395.67	1316.48	1290.09	2045.66	2128.15	1827.9	1864.19	#REF!	1626.63	1464.96	2164.45	1811.4	1715.72
	748	75800	515	4	Medial preoptic nucleus lateral part	MPOL	MPO	75800	0.12564	1798.79	2204.71	1583.89	1950.02	2220.63	1345.11	1384.91	1448.58	2188.79	1926.14	1878.38	1926.14	#REF!	1345.11	1599.81	2045.53	1814.71	1679.4
	756	75900	515	4	Medial preoptic nucleus medial part	MPOM	MPO	75900	0.17744	1454.01	1961.23	1059.51	1780.88	2350.09	1431.47	1268.03	1177.86	1944.32	2271.19	1792.16	1820.33	#REF!	1825.97	1369.48	2248.65	1809.06	1741.43
	980	76000	467	4	Premamillary nucleus dorsal part	PMD	MEZ	76000	0.03064	1697.13	1631.85	1370.76	1240.21	1436.03	652.741	424.282	489.556	750.653	1338.12	1468.67	1142.3	#REF!	293.734	293.734	489.556	261.097	489.556
	1004	76100	467	4	Premamillary nucleus ventral part	PMV	MEZ	76100	0.06016	897.606	847.74	880.984	631.649	1496.01	432.181	315.825	648.271	349.069	531.915	980.718	897.606	#REF!	1063.83	1180.19	1479.39	1512.63	1429.52
	63	76200	467	4	Paraventricular hypothalamic nucleus descending division	PVHd	MEZ	76200	0.00836	1435.41	1913.88	1076.56	956.938	2511.96	358.852	598.086	239.234	717.703	1435.41	1076.56	1315.79	#REF!	598.086	1076.56	2272.73	956.938	1674.64
	439	76300	63	4	Paraventricular hypothalamic nucleus dorsal cap	PaDC	PVHd	76300	0.00836	1435.41	1913.88	1076.56	956.938	2511.96	358.852	598.086	239.234	717.703	1435.41	1076.56	1315.79	#REF!	598.086	1076.56	2272.73	956.938	1674.64
	693	76700	467	4	Ventromedial hypothalamic nucleus	VMH	MEZ	76700	0.85552	1085.89	1667.99	1009.91	891.855	750.421	481.579	371.704	874.322	950.299	902.375	1448.24	1077.71	#REF!	541.191	479.241	760.941	495.605	951.468
	2044	76710	693	4	Ventromedial hypothalamic nucleus shell region	VMHSh	VMH	76710	0.3066	1121.98	1767.78	1118.72	988.258	1138.29	482.714	410.959	939.335	896.934	968.689	1369.86	1046.97	#REF!	554.468	603.392	919.765	658.839	1121.98
	769	76900	693	4	Ventromedial hypothalamic nucleus central part	VMHC	VMH	76900	0.19296	912.106	1606.55	803.275	673.715	212.479	502.695	357.587	709.992	963.93	735.904	1466.63	1015.75	#REF!	461.236	357.587	492.33	150.29	715.174
	777	77000	693	4	Ventromedial hypothalamic nucleus dorsomedial part	VMHDM	VMH	77000	0.1314	1369.86	2138.51	1354.64	1225.27	365.297	525.114	372.907	1141.55	1415.53	996.956	1757.99	1423.14	#REF!	350.076	213.09	410.959	190.259	829.528
	785	77100	693	4	Ventromedial hypothalamic nucleus ventrolateral part	VMHVL	VMH	77100	0.11988	692.359	942.61	625.626	475.476	492.159	216.884	200.2	533.867	542.209	800.801	800.801	575.576	#REF!	558.892	392.059	825.826	350.35	700.701
	2474	77110	467	4	Posterior hypothalamic area	PHA	MEZ	77110	0.65652	1596.3	1573.45	1069.27	1463.78	1637.42	517.882	851.459	740.267	907.817	1131.72	1766.89	1200.27	#REF!	1197.22	805.764	1031.19	924.572	1479.01
	946	77150	2474	4	Posterior hypothalamic nucleus	PH	PHA	77150	0.65652	1596.3	1573.45	1069.27	1463.78	1637.42	517.882	851.459	740.267	907.817	1131.72	1766.89	1200.27	#REF!	1197.22	805.764	1031.19	924.572	1479.01
	2364	77160	946	5	Posterior hypothalamic nucleus dorsal part	PHnd	PH	77160	0.21268	1109.65	1114.35	724.092	1029.72	1810.23	559.526	789.919	470.19	648.862	949.784	1382.36	992.101	#REF!	1617.45	1034.42	1438.78	1208.39	2064.13
	2365	77170	946	5	Posterior hypothalamic nucleus ventral part	PHnv	PH	77170	0.25524	1923.68	1872.75	1140.1	1723.87	1743.46	572.011	928.538	940.292	1038.24	1288.98	2221.44	1308.57	#REF!	889.359	728.726	779.658	803.166	1053.91
	2075	77180	946	5	Posterior hypothalamic area dorsal part	PHD	PH	77180	0.10512	2045.28	1988.2	1769.41	2007.23	1093.99	475.647	998.858	913.242	1350.84	1293.76	1740.87	1674.28	#REF!	742.009	627.854	989.346	837.139	1531.58
	2102	77190	946	5	Submammillothalamic nucleus	SMT	PH	77190	0.01992	1907.63	1857.43	1606.43	1907.63	1656.63	602.41	1104.42	953.815	1656.63	1606.43	2911.65	1656.63	#REF!	401.606	150.602	702.811	200.803	602.41
	290	77200	1097	3	Hypothalamic lateral zone	LZ	HY	77200	9.33732	595.995	735.54	575.754	475.19	1240.08	300.407	374.519	487.078	512.781	600.708	829.895	630.481	#REF!	457.091	473.905	628.125	665.073	744.753
	2309	77300	194	5	Juxtaparaventricular part of lateral hypothalamus	JPLH	LH	77300	0.10664	1547.26	2006.75	759.565	1162.79	1387.85	675.169	797.074	1050.26	1500.38	1284.7	2063.02	1706.68	#REF!	300.075	609.527	750.188	600.15	1153.41
	194	77300	290	4	Lateral hypothalamic area	LH	LZ	77300	5.75648	714.152	860.94	696.78	564.755	1464.78	344.134	437.594	594.808	619.823	724.227	1012.95	744.726	#REF!	574.309	560.064	755.67	783.639	857.121
	2065	77310	194	5	Magnocellular nucleus of the lateral hypothalamus	MCLH	LH	77310	0.03024	198.413	231.48	198.413	132.275	1190.48	0	231.482	198.413	33.0688	793.651	198.413	330.688	#REF!	727.513	496.032	562.169	694.444	760.582
	2033	77320	194	5	Ventrolateral hypothalamic nucleus	VLH	LH	77320	0.05768	346.741	468.1	537.448	69.3481	1751.04	138.696	52.0111	138.696	52.0111	104.022	277.392	173.37	#REF!	1178.92	1282.94	1612.34	1265.6	1022.88
	2105	77330	194	5	Gemini hypothalamic nucleus	Gem	LH	77330	0.0668	583.832	1197.6	808.383	778.443	658.683	329.341	344.311	748.503	793.413	598.802	1272.46	508.982	#REF!	793.413	508.982	568.862	464.072	673.653
	2081	77340	194	5	Peduncular lateral hypothalamus	PLH	LH	77340	0.309	582.524	686.08	721.683	323.625	1754.05	362.459	333.333	566.343	446.602	689.32	1019.42	537.217	#REF!	330.097	550.162	838.188	880.259	741.1
	2048	77350	194	5	Tuberal region of lateral hypothalamus	TuLH	LH	77350	0	#DIV/0!	#DIV/0!	#DIV/0!	#DIV/0!	#DIV/0!	#DIV/0!	#DIV/0!	#DIV/0!	#DIV/0!	#DIV/0!	#DIV/0!	#DIV/0!	#REF!	#DIV/0!	#DIV/0!	#DIV/0!	#DIV/0!	#DIV/0!
	2473	77360	194	5	Perifornical part of lateral hypothalamus	PeFLH	LH	77360	0	#DIV/0!	#DIV/0!	#DIV/0!	#DIV/0!	#DIV/0!	#DIV/0!	#DIV/0!	#DIV/0!	#DIV/0!	#DIV/0!	#DIV/0!	#DIV/0!	#REF!	#DIV/0!	#DIV/0!	#DIV/0!	#DIV/0!	#DIV/0!
	226	77400	290	4	Lateral preoptic area	LPO	LZ	77400	0.81192	819.046	973	658.932	553.01	1532.17	551.779	512.366	509.902	721.746	757.464	878.165	772.244	#REF!	438.467	794.413	804.266	874.47	825.205
	2379	77610	290	4	Paraterete nucleus	PTe	LZ	77610	0.04284	140.056	210.08	186.741	46.6853	1260.5	23.3427	0	93.3707	23.3427	513.539	70.028	93.3707	#REF!	443.511	326.797	443.511	373.483	676.937
	364	77700	290	4	Parasubthalamic nucleus	PSTh	LZ	77700	0.13364	187.07	523.8	381.622	276.863	1107.45	37.4139	134.69	209.518	97.2763	187.07	568.692	419.036	#REF!	636.037	314.277	314.277	651.003	576.175
	173	77800	290	4	Retrochiasmatic area	RCh	LZ	77800	0.17796	1393.57	1399.19	854.125	1050.8	960.89	455.159	629.355	927.175	685.547	797.932	1343	955.271	#REF!	803.551	747.359	752.978	1090.13	1106.99
	2042	77810	173	5	Retrochiasmatic area lateral part	RchL	RCh	77810	0.11372	1319.03	1231.09	835.385	1002.46	1072.81	490.196	650.721	782.624	668.308	712.276	1266.27	914.527	#REF!	659.515	826.592	879.353	1275.06	1336.62
	2283	77850	173	5	Retrochiasmatic area medial part	RChM	RCh	77850	0.03468	2076.12	2133.79	1239.91	1412.92	951.557	430.883	346.021	1211.07	749.712	980.392	1816.61	1326.41	#REF!	1268.74	490.196	403.691	461.361	778.547
	470	77900	290	4	Subthalamic nucleus	STh	LZ	77900	0.23284	34.3584	111.66	51.5375	47.2427	498.196	17.1792	25.7688	21.474	21.474	8.5896	206.15	38.6532	#REF!	171.792	103.075	85.8959	197.561	416.595
	2063	77910	290	4	Subincertal nucleus	SubI	LZ	77910	0.08832	249.094	418.93	350.996	237.772	1788.95	249.094	328.351	498.188	430.254	792.572	452.899	475.543	#REF!	192.482	350.996	1200.18	860.507	871.83
	614	78000	290	4	Medial tuberal nucleus	MTu	LZ	78000	0.16684	533.445	881.08	671.302	479.501	929.034	221.769	377.607	395.589	329.657	635.339	815.152	587.389	#REF!	1090.87	539.439	797.171	665.308	677.296
	2080	78010	614	5	Terete hypothalamic nucleus	Te	MTu	78010	0.04724	783.235	1312.45	698.561	508.044	1185.44	190.517	465.707	402.202	296.359	719.729	1079.59	677.392	#REF!	1291.28	571.549	825.572	783.235	550.381
	2079	78020	290	4	Perifornical nucleus	PeF	LZ	78020	0.07896	823.202	1165.15	1038.5	911.854	1621.07	607.903	797.872	1317.12	835.866	1063.83	1836.37	1671.73	#REF!	405.269	493.921	455.927	316.616	835.866
	2111	78030	290	4	Ventral linear nucleus of the thalamus	VLi	LZ	78030	0.0188	106.383	106.38	106.383	53.1915	159.575	0	0	53.1915	0	0	0	0	#REF!	0	0	53.1915	106.383	159.575
	797	78100	290	4	Zona incerta	ZI	LZ	78100	1.82872	177.173	267.95	207.796	178.267	530.426	97.3358	148.191	160.221	182.641	204.515	283.258	252.636	#REF!	48.1211	100.07	202.874	236.231	377.86
	2125	78110	797	5	Zona incerta caudal part	ZIC	ZI	78110	0.07544	39.7667	145.81	172.322	26.5111	79.5334	13.2556	0	13.2556	26.5111	26.5111	225.345	145.811	#REF!	13.2556	39.7667	53.0223	185.578	106.044
	2043	78120	797	5	Zona incerta rostral part	ZIR	ZI	78120	0.07404	1134.52	1904.38	918.423	1215.56	1688.28	675.311	958.941	742.842	1012.97	1175.04	1485.68	1607.24	#REF!	229.606	580.767	1012.97	837.385	1944.89
	2053	78130	797	5	Zona incerta dosal part	ZID	ZI	78130	0.64232	93.4114	118.32	137.003	79.3997	334.724	35.8077	60.7174	62.2743	77.8428	101.196	137.003	122.992	#REF!	18.6823	54.49	59.1605	151.015	169.697
	2054	78140	797	5	Zona incerta ventral part	ZIV	ZI	78140	0.63008	36.5033	77.77	92.0518	50.7872	458.672	33.3291	47.613	76.1808	53.9614	74.5937	146.013	103.162	#REF!	19.0452	41.2646	96.8131	185.691	284.091
	796	78200	797	5	DA13 dopamine cells	DA13	ZI	78200	0.01496	133.69	802.14	467.914	601.604	735.294	200.535	1069.52	735.294	1671.12	735.294	1270.05	735.294	#REF!	133.69	534.759	868.984	935.829	1804.81
	2110	78300	797	5	Nucleus of the fields of Forel	F	ZI	78300	0.15224	183.92	367.84	380.977	229.9	801.366	6.5686	39.4115	45.98	26.2743	59.1172	151.077	131.371	#REF!	98.5286	85.3915	65.6858	72.2543	164.214
	2191	78320	987	4	A7 noradrenaline cells	A7	P-mot	78320	0	#DIV/0!	#DIV/0!	#DIV/0!	#DIV/0!	#DIV/0!	93.1532	#DIV/0!	#DIV/0!	#DIV/0!	#DIV/0!	#DIV/0!	#DIV/0!	#REF!	#DIV/0!	#DIV/0!	#DIV/0!	#DIV/0!	#DIV/0!
	2246	78330	354	3	A5 noradrenaline cells	A5	MY	78330	0	#DIV/0!	#DIV/0!	#DIV/0!	#DIV/0!	#DIV/0!	9.5822	#DIV/0!	#DIV/0!	#DIV/0!	#DIV/0!	#DIV/0!	#DIV/0!	#REF!	#DIV/0!	#DIV/0!	#DIV/0!	#DIV/0!	#DIV/0!
	2477	78340	370	4	Ad1 adrenaline cells	Ad1	MY-mot	78340	0	#DIV/0!	#DIV/0!	#DIV/0!	#DIV/0!	#DIV/0!	111.658	#DIV/0!	#DIV/0!	#DIV/0!	#DIV/0!	#DIV/0!	#DIV/0!	#REF!	#DIV/0!	#DIV/0!	#DIV/0!	#DIV/0!	#DIV/0!
	2478	78350	370	4	Ad2 adrenaline cells	Ad2	MY-mot	78350	0	#DIV/0!	#DIV/0!	#DIV/0!	#DIV/0!	#DIV/0!	0	#DIV/0!	#DIV/0!	#DIV/0!	#DIV/0!	#DIV/0!	#DIV/0!	#REF!	#DIV/0!	#DIV/0!	#DIV/0!	#DIV/0!	#DIV/0!
	2266	78360	370	4	Ad3 adrenaline cells	Ad3	MY-mot	78360	0.00236	0	0	423.729	0	423.729	37.611	0	0	0	0	0	0	#REF!	0	0	0	0	0
	10671	78400	1097	3	Median eminence	ME	HY	78400	0.03288	1399.03	2433.09	1125.3	1490.27	425.791	#DIV/0!	912.409	942.822	1186.13	1490.27	1703.16	1611.92	#REF!	273.723	0	152.068	182.482	1246.96
	313	78500	343	1	Midbrain	MB	BS	78500	34.3401	226.091	244.61	205.125	233.546	490.04	#DIV/0!	355.619	237.39	245.69	389.341	368.258	252.242	#REF!	101.31	91.7004	207.716	144.583	403.901
	2107	78510	313	2	Prerubral field	PR	MB	78510	0.29216	376.506	417.58	239.595	263.554	499.726	#DIV/0!	164.293	219.058	246.44	136.911	290.937	263.554	#REF!	147.18	136.911	123.22	119.797	472.344
	339	78600	313	2	Midbrain sensory related	MBsen	MB	78600	14.9291	179.314	179.78	167.793	185.745	526.422	#DIV/0!	376.647	203.629	228.547	415.565	333.644	252.192	#REF!	85.7387	95.7862	196.998	96.9249	399.154
	2476	78610	339	3	Superior colliculus	SC	MBsen	78610	8.58184	241.673	247.97	213.707	250.063	678.992	0	524.246	277.912	318.813	626.323	475.19	357.383	#REF!	84.5972	92.521	152.065	95.6671	344.099
	302	78700	2476	4	Superior colliculus sensory related	SCs	SC	78700	2.43744	199.8	184.21	150.978	209.646	921.459	760.341	456.216	216.621	235.083	488.627	361.445	267.084	#REF!	129.234	125.131	162.465	131.696	352.009
	851	78800	302	5	Optic layer of the superior colliculus	Op	SCs	78800	0.8148	267.55	250.37	203.731	271.232	806.333	266.656	478.645	282.278	263.868	591.556	424.644	338.733	#REF!	85.9107	58.9102	137.457	125.184	298.233
	842	78900	302	5	Superficial gray layer of the superior colliculus	SuG	SCs	78900	1.05176	169.24	133.11	123.602	192.059	986.917	119.797	443.067	183.502	224.386	458.279	346.087	239.598	#REF!	94.1279	88.4232	109.341	89.374	278.581
	834	79000	302	5	Zonal layer of superior colliculus	Zo	SCs	79000	0.57088	159.403	183.93	126.121	154.148	965.177	265.991	448.43	183.927	213.705	397.632	299.538	215.457	#REF!	255.745	287.276	296.034	218.96	564.042
	4	79100	339	3	Inferior colliculus	IC	MBsen	79100	5.61576	86.3641	82.8	92.4185	90.2816	305.39	390.126	175.933	99.5413	103.103	129.101	136.758	108.801	#REF!	71.7623	94.0211	238.97	80.6658	467.613
	811	79200	4	4	Central nucleus of the inferior colliculus	CIC	IC	79200	1.87984	43.6207	47.34	110.116	119.159	333.539	384.42	205.337	123.415	119.691	157.46	139.374	114.371	#REF!	39.897	60.6435	218.636	78.1981	613.882
	820	79300	4	4	Dorsal cortex of the inferior colliculus	DCIC	IC	79300	1.48344	0.674109	38.42	49.8841	47.1876	345.144	438.144	43.143	61.3439	24.942	34.3796	49.8841	30.3349	#REF!	107.183	157.067	330.987	110.554	489.403
	828	79400	4	4	External cortex of the inferior colliculus	ECIC	IC	79400	2.23404	179.943	142.79	106.534	95.343	256.934	367.955	240.819	105.638	141.895	168.753	193.372	157.114	#REF!	74.3048	80.5715	193.372	60.4286	328.553
	2188	79410	828	6	External cortex of the inferior colliculus layer 1	ECIC1	ECIC	79410	0.29948	186.991	140.24	136.904	153.6	290.503	338.075	353.947	203.686	233.738	300.521	260.451	237.078	#REF!	240.417	223.721	333.912	166.956	514.225
	2189	79420	828	6	External cortex of the inferior colliculus layer 2	ECIC2	ECIC	79420	0.174	218.391	166.67	155.172	120.69	258.621	94.9115	402.299	189.655	252.874	155.172	252.874	252.874	#REF!	97.7011	132.184	316.092	74.7126	350.575
	2190	79430	828	6	External cortex of the inferior colliculus layer 3	ECIC3	ECIC	79430	0.71228	273.769	158.65	160.049	105.296	220.419	92.0291	314.483	123.547	207.784	202.168	270.961	204.976	#REF!	56.1577	33.6946	179.705	42.1183	256.921
	2457	79440	4	4	Commissural nucleus of the inferior colliculus	Com	IC	79440	0.01844	0	0	0	0	108.46	28.9867	0	0	0	54.2299	0	0	#REF!	162.69	54.2299	433.839	379.61	650.759
	2475	79450	4	4	Recess of the inferior colliculus	ReIC	IC	79450	0	#DIV/0!	#DIV/0!	#DIV/0!	#DIV/0!	#DIV/0!	141.895	#DIV/0!	#DIV/0!	#DIV/0!	#DIV/0!	#DIV/0!	#DIV/0!	#REF!	#DIV/0!	#DIV/0!	#DIV/0!	#DIV/0!	#DIV/0!
	580	79500	339	3	Nucleus of the brachium of the inferior colliculus	BIC	MBsen	79500	0.1978	161.78	267.95	187.058	171.891	980.789	260.451	267.947	96.0566	111.224	116.279	222.447	126.39	#REF!	358.948	278.059	495.45	399.393	505.561
	271	79600	339	3	Sagulum nucleus	Sag	MBsen	79600	0.0476	21.0084	42.02	294.118	84.0336	273.109	287.356	189.076	147.059	63.0252	63.0252	84.0336	42.0168	#REF!	231.092	147.059	336.135	273.109	315.126
	874	79700	339	3	Parabigeminal nucleus	PBG	MBsen	79700	0.08364	95.648	59.78	251.076	131.516	490.196	199.36	107.604	107.604	119.56	59.78	83.692	143.472	#REF!	549.976	239.12	502.152	442.372	526.064
	2163	79710	339	3	Microcellular tegmental nucleus	MiTg	MBsen	79710	0.39436	164.824	71	187.646	167.36	139.466	0	149.609	134.395	129.323	152.145	177.503	98.8944	#REF!	53.2508	58.3223	347.398	106.502	529.973
	460	79800	339	3	Mesencephalic trigeminal nucleus	Me5	MBsen	79800	0	#DIV/0!	#DIV/0!	#DIV/0!	#DIV/0!	#DIV/0!	#DIV/0!	#DIV/0!	#DIV/0!	#DIV/0!	#DIV/0!	#DIV/0!	#DIV/0!	#REF!	#DIV/0!	#DIV/0!	#DIV/0!	#DIV/0!	#DIV/0!
	2108	79810	339	3	Subcommissural organ	SCO	MBsen	79810	0.00808	1485.15	371.29	742.574	618.812	1732.67	126.39	742.574	990.099	1361.39	1608.91	1237.62	1113.86	#REF!	247.525	371.287	123.762	247.525	1485.15
	323	79900	313	2	Midbrain motor related	MBmot	MB	79900	16.8632	258.135	288.14	227.833	257.661	454.243	168.067	354.024	279.365	274.621	392.511	403.837	258.906	#REF!	110.18	88.0614	221.013	185.255	413.029
	2147	79910	323	3	Mesencephalic reticular formation	mRt	MBmot	79910	2.25896	193.009	162.91	165.12	161.579	337.323	107.604	239.933	154.939	198.321	255.87	269.15	161.579	#REF!	81.4534	60.2047	178.843	120.852	308.106
	2131	79920	323	3	prosomere 1 reticular formation	p1Rt	MBmot	79920	2.31168	210.669	196.83	164.383	227.973	391.49	86.2156	226.242	198.557	227.108	357.316	326.602	186.877	#REF!	144.916	63.5901	179.523	150.107	398.844
	2181	79930	323	3	Isthmic reticular formation	isRt	MBmot	79930	0.78908	81.1071	173.62	217.975	173.62	174.887	#DIV/0!	138.136	55.7611	55.7611	115.324	159.68	45.6228	#REF!	31.6825	12.673	92.5128	48.1573	166.016
	2154	79940	323	3	Pararubral nucleus	PaR	MBmot	79940	0.15192	164.56	184.31	197.472	197.472	355.45	1732.67	85.5714	151.395	144.813	184.308	125.066	85.5714	#REF!	13.1648	6.5824	0	19.7472	98.7362
	381	80000	323	3	Substantia nigra reticular part	SNR	MBmot	80000	1.52428	82.662	87.91	222.4	75.4455	287.349	285.532	38.7068	31.4903	28.8661	49.2036	111.528	61.0124	#REF!	31.4903	59.0443	90.5345	150.235	174.509
	749	80100	323	3	Ventral tegmental area	VTA	MBmot	80100	0.89	462.921	557.3	494.382	486.517	665.168	295.269	269.663	265.168	229.214	256.18	358.427	302.247	#REF!	164.045	105.618	160.674	184.27	248.315
	2138	80110	749	4	Paranigral nucleus of the VTA	PN	VTA	80110	0.075	640	746.67	733.333	573.333	1146.67	238.355	266.667	280	226.667	373.333	546.667	333.333	#REF!	386.667	173.333	373.333	280	493.333
	2144	80120	749	4	Parainterfascicular nucleus of the VTA	PIF	VTA	80120	0.09528	440.806	703.19	713.686	818.64	409.32	190.095	262.385	367.338	230.898	199.412	451.301	314.861	#REF!	41.9815	73.4677	157.431	209.908	94.4584
	2124	80130	749	4	Parabranchial pigmented nucleus of the VTA	PBP	VTA	80130	0.55432	474.455	461.83	469.043	452.807	496.103	98.7362	279.622	254.366	174.989	234.522	330.134	243.542	#REF!	88.3966	75.7685	120.869	164.165	189.421
	2427	80140	749	4	Ventral tegmental area rostral part	VTAR	VTA	80140	0.12396	314.618	629.24	363.02	419.49	1185.87	9.1847	225.879	290.416	354.953	258.148	282.349	427.557	#REF!	330.752	169.41	112.94	104.873	258.148
	2112	80150	313	3	Rostral interstitial nucleus of the medial longitudinal fasciculus	RI	MBmot	80150	0.04332	1108.03	807.94	507.849	784.857	1731.3	134.832	461.68	438.596	761.773	761.773	1246.54	784.857	#REF!	530.933	323.176	346.26	415.512	1015.7
	2101	80160	313	3	DA11 dopamine cells	DA11	MBmot	80160	0.01764	1190.48	1417.23	1247.17	1077.1	2040.82	200	340.136	510.204	793.651	1643.99	1133.79	1020.41	#REF!	850.34	680.272	396.825	623.583	1077.1
	246	80200	323	3	Retroisthmic nucleus	RIs	MBmot	80200	0.32688	58.1253	119.31	140.724	64.2438	208.027	199.412	122.369	48.9476	104.014	269.212	229.442	61.1845	#REF!	27.533	61.1845	73.4214	107.073	134.606
	2153	80210	246	4	Retrorubral field	RRF	RIs	80210	0.18684	80.2826	80.28	230.143	90.9869	299.722	120.869	133.804	48.1696	101.691	214.087	230.143	80.2826	#REF!	5.3522	5.3522	58.8739	123.1	133.804
	294	80700	2476	4	Superior colliculus motor related	SCm	SC	80700	6.1444	258.284	273.26	238.591	266.096	582.807	121.007	551.234	302.226	352.028	680.945	520.311	393.204	#REF!	66.8902	79.5847	147.94	81.3749	340.961
	26	80800	294	6	Deep gray layer of the superior colliculus	DpG	SCm	80800	1.41024	304.913	287.89	261.658	257.403	450.987	323.176	631.807	347.459	419.787	805.537	563.025	439.642	#REF!	66.6553	39.0005	126.22	75.8736	269.458
	42	80900	294	6	Deep white layer of the superior colliculus	DpWh	SCm	80900	0.5558	286.074	316.66	325.657	232.098	403.023	226.757	654.912	426.412	507.377	705.29	642.317	516.373	#REF!	43.181	37.7834	134.941	77.366	327.456
	17	81000	294	6	Intermediate white layer of the superior colliculus	InWh	SCm	81000	2.05436	244.358	282.33	251.173	276.485	635.721	45.8884	573.901	311.533	361.67	747.191	541.775	416.675	#REF!	42.349	30.6665	117.798	59.8727	263.342
	10	81100	294	6	Intermediate gray layer of the superior colliculus	InG	SCm	81100	2.124	233.522	243.41	188.324	270.716	666.196	26.7609	448.682	230.697	257.062	527.778	439.265	307.439	#REF!	96.9868	164.783	194.915	106.874	467.043
	795	81500	323	3	Periaqueductal gray	PAG	MBmot	81500	3.96884	389.283	475.45	253.978	362.575	703.984	392.39	730.188	561.373	518.035	753.621	748.077	495.611	#REF!	140.091	112.627	362.826	320.497	660.898
	2141	81510	795	4	Dorsomedial periaqueductal gray	DMPAG	PAG	81510	0.50832	422.962	360.01	245.908	363.944	395.42	436.096	999.37	830.186	680.674	989.534	775.102	527.227	#REF!	60.9852	41.3126	123.938	149.512	285.253
	2142	81520	795	4	Lateral periaqueductal gray	LPAG	PAG	81520	1.46528	324.17	526.86	218.388	288.682	840.795	491.184	809.402	599.203	576.682	730.918	888.567	563.715	#REF!	167.203	133.763	491.374	410.161	784.833
	2143	81530	795	4	Pleoglial periaqueductal gray	PlPAG	PAG	81530	0.00112	2678.57	0	0	892.857	892.857	394.77	892.857	892.857	0	892.857	0	0	#REF!	0	0	0	0	892.857
	2148	81540	795	4	Dorsolateral periaqueductal gray	DLPAG	PAG	81540	0.47824	723.486	556.21	397.29	547.842	495.567	335.217	798.762	516.477	466.293	1035.05	1024.59	650.301	#REF!	77.367	27.183	163.098	194.463	451.656
	2162	81550	795	4	Ventrolateral periaqueductal gray	VLPAG	PAG	81550	0.7786	163.113	368.61	98.8955	244.028	911.893	578.507	346.776	202.928	246.596	288.98	321.089	152.838	#REF!	134.857	151.554	386.591	358.336	792.448
	2114	81560	795	4	prosomere 1 periaqueductal gray	p1PAG	PAG	81560	0.43836	463.09	497.31	396.934	563.464	643.307	855.76	520.12	522.402	422.028	720.869	606.807	515.558	#REF!	205.311	141.436	349.028	257.779	652.432
	2123	81570	323	3	Lithoid nucleus	Lth	MBmot	81570	0.0386	336.788	310.88	259.067	310.881	284.974	474.312	1295.34	880.829	777.202	1709.84	751.295	336.788	#REF!	51.8135	51.8135	725.389	466.321	621.762
	50	81600	323	3	Precommissural nucleus	PrC	MBmot	81600	0.11864	775.455	480.45	472.016	649.022	859.744	892.857	716.453	699.595	632.164	1045.18	724.882	514.16	#REF!	438.301	556.305	1188.47	590.02	944.032
	67	81700	323	3	Interstitial nucleus of Cajal	InC	MBmot	81700	0.18484	270.504	286.73	86.5614	210.993	200.173	750.669	486.908	454.447	340.835	730.361	584.289	324.605	#REF!	21.6403	5.4101	59.5109	37.8706	265.094
	2129	81710	67	4	Interstitial nucleus of Cajal shell region	InCSh	InC	81710	0.0934	289.079	160.6	85.6531	192.72	192.72	382.738	492.505	481.799	449.679	588.865	674.518	310.493	#REF!	32.1199	0	53.5332	21.4133	321.199
	587	81800	323	3	Nucleus of Darkschewitsch	Dk	MBmot	81800	0.08996	544.687	578.03	366.83	355.714	133.393	583.995	1078.26	1322.81	1144.95	1356.16	1011.56	733.659	#REF!	44.4642	66.6963	200.089	144.509	200.089
	2152	81810	323	3	Supraoculomotor cap	Su3C	MBmot	81810	0.10192	147.174	431.71	117.739	235.479	755.495	1165.8	932.104	873.234	941.915	667.19	667.19	431.711	#REF!	9.8116	29.4349	58.8697	29.4349	196.232
	2156	81820	323	3	Supraoculomotor periaqueductal gray	Su3	MBmot	81820	0.07448	228.249	281.95	26.8528	255.102	349.087	488.874	711.6	389.366	671.321	456.498	416.219	214.823	#REF!	53.7057	26.8528	134.264	255.102	349.087
	1100	81900	323	3	Pretectal region	PRT	MBmot	81900	1.54576	322.172	374.57	304.704	394.628	600.352	324.605	365.516	330.582	278.18	445.089	436.031	296.294	#REF!	137.149	171.437	245.187	193.432	644.343
	215	82000	1100	4	Anterior pretectal nucleus	APT	PRT	82000	1.08232	287.346	280.88	227.29	318.76	416.697	396.146	179.245	140.439	128.428	260.551	308.596	176.473	#REF!	34.1858	127.504	105.329	131.2	560.832
	2099	82010	215	5	Anterior pretectal nucleus dorsal part	APTD	APT	82010	0.58764	423.729	423.73	326.731	420.325	663.672	255.669	262.065	243.346	192.295	325.029	365.87	250.153	#REF!	30.631	211.013	142.945	176.979	673.882
	2100	82020	215	5	Anterior pretectal nucleus ventral part	APTV	APT	82020	0.15824	170.627	139.03	157.988	278.059	25.2781	255.102	107.432	25.2781	63.1951	202.225	240.142	126.39	#REF!	0	12.639	25.2781	25.2781	259.1
	531	82100	1100	4	Medial pretectal area	MPT	PRT	82100	0.06948	172.712	532.53	489.349	590.098	1712.72	40.2793	1381.69	1683.94	1079.45	1381.69	877.951	863.558	#REF!	978.699	575.705	849.165	518.135	1108.23
	2415	82110	1100	4	Retrocommissural nucleus	ReC	PRT	82110	0.03164	600.506	600.51	537.295	726.928	2781.29	326.7	1706.7	1611.88	1643.49	1042.98	1074.59	663.717	#REF!	1706.7	1011.38	1769.91	790.139	979.772
	628	82200	1100	4	Nucleus of the optic tract	OT	PRT	82200	0.10628	310.501	592.77	414.001	583.365	959.729	143.211	385.773	376.364	207	536.319	423.41	376.364	#REF!	84.682	103.5	319.91	357.546	762.138
	634	82300	1100	4	Nucleus of the posterior commissure	PCom	PRT	82300	0.1198	609.349	601	617.696	575.96	442.404	163.365	717.863	584.307	534.224	1001.67	884.808	726.21	#REF!	175.292	242.07	542.571	166.945	667.78
	2121	82310	634	5	Magnocellular nucleus of the posterior commissure	MCPC	PCom	82310	0.04192	715.649	596.37	477.099	286.26	119.275	164.307	429.389	357.824	405.534	739.504	691.794	572.519	#REF!	23.855	47.7099	262.405	47.7099	715.649
	706	82400	1100	4	Olivary pretectal nucleus	OPT	PRT	82400	0.07364	339.489	814.77	366.649	570.342	1235.74	1108.23	814.775	706.138	746.877	869.093	746.877	597.501	#REF!	285.171	190.114	353.069	190.114	950.57
	1061	82500	1100	4	Posterior pretectal nucleus	PPT	PRT	82500	0.03184	94.2211	345.48	408.291	345.477	628.141	1359.04	188.442	376.884	31.407	251.256	439.699	188.442	#REF!	62.8141	31.407	314.07	439.699	942.211
	2122	82510	1100	4	Retroparafascicular nucleus	RPF	PRT	82510	0.03076	715.215	422.63	520.156	552.666	130.039	357.546	910.273	552.666	715.215	910.273	812.744	292.588	#REF!	0	0	487.646	325.098	650.195
	616	82600	323	3	Cuneiform nucleus	CnF	MBmot	82600	0.9892	175.9	122.32	155.681	101.092	224.424	843.072	197.129	133.441	128.387	220.38	284.068	189.042	#REF!	59.6442	44.4804	270.926	119.288	387.182
	2192	82610	616	4	Precuneiform area	PrCnF	CnF	82610	0.5122	199.141	144.47	234.284	148.38	236.236	477.099	308.473	238.188	189.379	255.76	367.044	189.379	#REF!	56.6185	35.1425	187.427	95.6658	247.95
	214	82700	323	3	Red nucleus	R	MBmot	82700	0.658	121.581	203.65	168.693	148.936	135.258	733.297	115.501	141.337	97.2644	132.219	238.602	91.1854	#REF!	19.7568	12.1581	31.9149	59.2705	202.128
	2137	82710	214	4	Red nucleus parvicellular part	RPC	R	82710	0.3764	55.7917	239.11	100.956	106.27	164.718	282.663	85.0159	103.613	77.0457	66.4187	191.286	69.0755	#REF!	29.2242	15.9405	39.8512	50.4782	270.988
	2139	82720	214	4	Red nucleus magnocellular part	RMC	R	82720	0.268	205.224	152.99	261.194	201.493	97.0149	910.273	156.716	194.03	123.134	197.761	294.776	119.403	#REF!	7.4627	7.4627	22.3881	74.6269	108.209
	2136	82730	323	3	Medial accessory oculomotor nucleus	MA3	MBmot	82730	0.04304	394.981	325.28	162.639	302.045	255.576	136.474	209.108	255.576	464.684	371.747	418.216	162.639	#REF!	92.9368	69.7026	441.45	441.45	975.836
	35	82800	323	3	Oculomotor nerve	3N	MBmot	82800	0.10264	272.798	389.71	185.113	409.197	136.399	206.95	496.882	155.885	311.769	253.312	409.197	214.341	#REF!	58.4567	87.6851	224.084	175.37	243.57
	2157	82810	35	4	Oculomotor nucleus parvicellular part	3PC	3N	82810	0.04444	225.023	360.04	202.52	225.023	157.516	72.9483	427.543	202.52	495.05	225.023	270.027	157.516	#REF!	67.5068	157.516	270.027	292.529	247.525
	975	82900	323	3	Edinger-Westphal nucleus	EW	MBmot	82900	0.02944	509.511	101.9	67.9348	679.348	713.315	47.8215	713.315	441.576	339.674	441.576	203.804	237.772	#REF!	747.283	679.348	1324.73	951.087	1392.66
	2130	82910	975	4	Pre-Edinger-Westphal nucleus	PrEW	EW	82910	0.01568	637.755	0	127.551	892.857	1020.41	89.5522	637.755	637.755	510.204	637.755	318.878	191.327	#REF!	765.306	510.204	1084.18	829.082	1466.84
	115	83000	323	3	Trochlear nucleus	4N	MBmot	83000	0.10144	138.013	266.17	177.445	591.483	118.296	162.639	552.051	157.729	167.587	147.871	276.025	226.735	#REF!	19.7161	39.4322	78.8644	49.2902	118.296
	2180	83010	115	4	Trochlear nucleus shell region	4Sh	4N	83010	0.01348	445.104	593.47	0	593.472	74.184	77.9423	964.392	222.552	370.92	0	445.104	296.736	#REF!	0	0	74.184	0	74.184
	2179	83020	115	4	Paratrochlear nucleus	Pa4	4N	83020	0.07536	66.3482	199.04	238.853	623.673	66.3482	90.009	544.055	145.966	145.966	199.045	265.393	212.314	#REF!	0	0	39.8089	0	119.427
	757	83100	323	3	Ventral tegmental nucleus	VTg	MBmot	83100	0.05792	51.7956	34.53	51.7956	0	86.326	169.837	379.834	207.182	86.326	69.0608	345.304	155.387	#REF!	0	17.2652	0	51.7956	86.326
	231	83200	323	3	Anterior tegmental nucleus	ATg	MBmot	83200	0.06304	0	31.73	111.041	79.3147	15.8629	191.327	158.629	111.041	31.7259	95.1777	285.533	206.218	#REF!	0	0	15.8629	31.7259	79.3147
	2168	83210	323	3	Rhabdoid nucleus	Rbd	MBmot	83210	0.0118	0	0	169.492	0	254.237	187.303	254.237	0	169.492	338.983	84.7458	84.7458	#REF!	0	0	0	84.7458	169.492
	66	83300	323	3	Lateral terminal nucleus of the accessory optic tract	LT	MBmot	83300	0.015	133.333	133.33	200	0	66.6667	74.184	133.333	0	66.6667	133.333	333.333	66.6667	#REF!	133.333	0	66.6667	600	133.333
	75	83400	323	3	Dorsal terminal nucleus	DT	MBmot	83400	0.01692	59.1017	59.1	0	118.203	1359.34	172.505	59.1017	0	59.1017	0	0	118.203	#REF!	1004.73	354.61	1713.95	1004.73	1241.13
	58	83500	323	3	Medial terminal nucleus	MT	MBmot	83500	0.02624	266.768	266.77	266.768	190.549	762.195	69.0608	114.329	0	342.988	342.988	38.1098	228.659	#REF!	304.878	152.439	152.439	38.1098	381.098
	615	83600	323	3	Substantia nigra lateral part	SNL	MBmot	83600	0.15048	73.0994	99.68	318.979	19.9362	26.5816	15.8629	6.6454	0	6.6454	13.2908	99.681	66.454	#REF!	6.6454	73.0994	19.9362	106.326	93.0356
	348	83700	313	2	Midbrain behavioral state related	MBsta	MB	83700	1.95204	259.216	329.91	276.121	378.578	510.235	84.7458	263.314	143.44	129.608	211.573	319.153	178.787	#REF!	120.387	75.8181	172.128	151.636	314.031
	374	83800	348	3	Substantia nigra compact part	SNC	MBsta	83800	0.2722	176.341	157.97	168.993	106.539	260.838	66.6667	73.4754	51.4328	106.539	165.32	180.015	143.277	#REF!	62.4541	36.7377	55.1065	84.4967	191.036
	2134	83810	374	4	Substantia nigra compact part dorsal tier	SNCD	SNC	83810	0.25936	169.648	150.37	161.937	100.247	250.617	0	61.6903	53.979	107.958	150.37	181.215	134.948	#REF!	61.6903	30.8452	42.4121	88.6798	192.782
	2135	83820	374	4	Substantia nigra compact part medial tier	SNCM	SNC	83820	0.00908	220.264	220.26	440.529	220.264	550.661	0	440.529	0	110.132	660.793	220.264	440.529	#REF!	110.132	220.264	440.529	0	220.264
	1052	83900	348	3	Pedunculotegmental nucleus	PTg	MBsta	83900	0.64312	91.7403	101.07	158.602	104.18	262.781	0	225.463	125.948	63.7517	220.799	334.308	127.503	#REF!	37.3181	48.2025	161.712	116.619	247.232
	2183	83910	1052	4	Subpeduncular tegmental nucleus	SPTg	PTg	83910	0.16544	54.4004	84.62	139.023	132.979	265.957	151.636	380.803	157.157	108.801	199.468	398.936	169.246	#REF!	18.1335	12.089	120.89	84.6228	163.201
	165	84000	348	3	Midbrain raphÈ nuclei	RAmb	MBsta	84000	1.03672	384.868	517.02	377.151	620.225	729.223	18.3688	336.639	178.447	176.518	217.995	346.284	219.924	#REF!	187.129	103.21	209.314	190.987	387.761
	12	84100	165	4	Interfascicular nucleus	IF	RAmb	84100	0.04056	641.026	1060.16	690.335	714.99	1109.47	19.2782	419.132	419.132	147.929	665.681	221.893	517.751	#REF!	517.751	49.3097	271.203	147.929	369.822
	100	84200	165	4	Interpeduncular nucleus	IP	RAmb	84200	0.3548	611.612	887.82	862.458	941.375	755.355	0	259.301	211.387	248.027	284.667	383.315	233.935	#REF!	329.763	194.476	363.585	205.75	510.147
	2140	84210	100	5	Interpeduncular nucleus rostral subnucleus	IPR	IP	84210	0.09344	706.336	898.97	781.25	781.25	610.017	97.9599	321.062	406.678	385.274	385.274	299.658	288.955	#REF!	321.062	203.339	342.466	128.425	588.613
	2145	84220	100	5	Interpeduncular nucleus lateral subnucleus	IPL	IP	84220	0.05992	317.089	817.76	734.312	650.868	1001.34	181.335	467.29	216.956	200.267	383.845	383.845	300.401	#REF!	483.979	200.267	467.29	283.712	400.534
	2146	84230	100	5	Interpeduncular nucleus caudal subnucleus	IPC	IP	84230	0.07016	755.416	1126	954.96	1396.81	912.201	219.924	114.025	99.7719	299.316	114.025	498.86	128.278	#REF!	342.075	256.556	313.569	185.291	498.86
	2149	84240	100	5	Interpeduncular nucleus dorsomedial subnucleus	IPDM	IP	84240	0.02532	710.9	1145.34	1263.82	1105.85	631.912	271.203	157.978	157.978	157.978	118.483	276.461	315.956	#REF!	118.483	78.9889	276.461	236.967	710.9
	2151	84250	100	5	Interpeduncular nucleus dorsolateral subnucleus	IPDL	IP	84250	0.0254	354.331	866.14	1102.36	1062.99	236.22	186.02	118.11	118.11	118.11	157.48	354.331	236.22	#REF!	196.85	78.7402	118.11	118.11	314.961
	2150	84260	100	5	Interpeduncular nucleus intermediate subnucleus	IPI	IP	84260	0.07596	684.571	671.41	789.889	895.208	789.889	299.658	250.132	131.648	157.978	355.45	421.274	197.472	#REF!	342.285	210.637	487.099	289.626	526.593
	2160	84270	100	5	Interpeduncular nucleus apical subnucleus	IPA	IP	84270	0.0046	0	217.39	434.783	217.391	1086.96	200.267	0	0	0	0	434.783	0	#REF!	0	0	0	0	217.391
	197	84300	165	4	Rostral linear nucleus (midbrain)	RLi	RAmb	84300	0.09496	663.437	747.68	368.576	863.521	768.745	142.531	242.207	179.023	189.554	294.861	526.538	305.392	#REF!	168.492	21.0615	189.554	147.43	315.923
	591	84400	165	4	Caudal linear nucleus of the raphÈ	CLi	RAmb	84400	0.04696	63.8842	212.95	106.474	63.8842	276.831	0	212.947	298.126	127.768	106.474	617.547	127.768	#REF!	21.2947	0	42.5894	42.5894	42.5894
	872	84500	165	4	Dorsal raphÈ nucleus	DR	RAmb	84500	0.49944	180.202	194.22	34.0381	390.437	714.801	78.7402	414.464	124.139	130.146	130.146	270.303	178.2	#REF!	78.0875	68.0762	114.128	206.231	348.39
	2173	84510	872	5	Dorsal raphÈ nucleus caudal part	DRC	DR	84510	0.03596	0	0	83.426	0	945.495	184.308	250.278	139.043	0	83.426	166.852	27.8087	#REF!	361.513	305.895	111.235	472.748	583.982
	2174	84520	872	5	Dorsal raphÈ nucleus dorsal part	DRD	DR	84520	0.05108	19.5771	176.19	0	332.811	1233.36	0	156.617	137.04	19.5771	274.08	352.388	195.771	#REF!	137.04	137.04	97.8857	352.388	391.543
	2175	84530	872	5	Dorsal raphÈ interfascicular part	DRI	DR	84530	0.01496	200.535	133.69	66.8449	66.8449	334.225	179.023	66.8449	0	66.8449	0	133.69	200.535	#REF!	0	0	267.38	0	401.07
	2176	84540	872	5	Dorsal raphÈ nucleus lateral part	DRL	DR	84540	0.14156	113.026	437.98	28.2566	367.335	1066.69	127.768	416.784	141.283	105.962	183.668	317.886	226.053	#REF!	70.6414	56.5131	183.668	353.207	437.977
	2177	84550	872	5	Dorsal raphÈ nucleus ventral part	DRV	DR	84550	0.05712	210.084	17.51	0	437.675	700.28	256.287	105.042	87.535	192.577	70.028	227.591	245.098	#REF!	52.521	52.521	105.042	70.028	682.773
	2178	84560	872	5	Posterodorsal raphÈ nucleus	PDR	DR	84560	0.1752	325.342	102.74	39.9543	530.822	222.603	0	639.269	102.74	194.064	79.9087	222.603	125.571	#REF!	11.4155	5.7078	28.5388	28.5388	102.74
	1065	84600	343	1	Hindbrain	HB	BS	84600	41.8267	94.3416	135.46	191.146	114.52	117.652	391.543	116.72	52.2632	36.3404	104.311	172.115	117.007	#REF!	51.1874	53.7216	94.1025	81.3117	202.191
	771	84700	1065	2	Pons	P	HB	84700	13.6132	153.381	205.32	283.475	184.013	257.471	267.38	142.656	58.1788	55.6813	159.331	273.999	138.322	#REF!	79.5551	96.8178	152.866	142.582	250.051
	1132	84800	771	3	Pons sensory related	P-sen	P	84800	3.68152	173.57	181.72	198.288	157.815	88.5504	409.72	119.787	37.7561	56.77	188.238	272.442	129.838	#REF!	107.293	94.5262	223.277	142.604	253.428
	612	84900	1132	4	Paralemniscal nucleus	PL	P-sen	84900	0.91848	39.1952	184	173.112	52.2603	143.716	105.042	31.5739	2.1775	6.5325	40.2839	130.651	72.9466	#REF!	107.787	103.432	157.869	141.538	223.195
	82	85000	612	5	Dorsal nucleus of the lateral lemniscus	DLL	PL	85000	0.10084	69.4169	148.75	69.4169	89.2503	109.084	216.895	79.3336	9.9167	29.7501	69.4169	406.585	148.75	#REF!	19.8334	49.5835	69.4169	29.7501	148.75
	99	85200	612	5	Ventral nucleus of the lateral lemniscus	VLL	PL	85200	0.31116	51.4205	199.25	212.109	67.4894	138.193	42.4609	6.4276	0	0	9.6413	73.917	44.9929	#REF!	70.7032	138.193	147.834	215.323	244.247
	2172	85210	612	5	Intermediate nucleus of the lateral lemniscus	ILL	PL	85210	0.27072	7.38771	210.55	177.305	25.857	77.5709	62.0721	25.857	0	0	7.3877	66.4894	55.4078	#REF!	136.673	66.4894	210.55	81.2648	188.387
	2184	85220	612	5	Triangular nucleus lateral lemniscus	TrLL	PL	85220	0.0458	131.004	480.35	109.17	65.5022	283.843	45.0901	87.3362	0	21.8341	371.179	305.677	109.17	#REF!	65.5022	109.17	349.345	109.17	262.009
	7	85300	1132	4	Principal sensory trigeminal nucleus	Pr5	P-sen	85300	1.1778	213.958	137.54	239.429	195.279	31.4145	6.5325	165.563	30.5655	30.5655	124.809	213.958	72.1684	#REF!	132.45	30.5655	269.146	38.2068	40.7539
	2203	85310	7	5	Principal sensory trigeminal nucleus dorsomedial part	Pr5DM	Pr5	85310	0.337	204.748	172.11	195.846	261.128	0	19.8334	293.769	38.5757	35.6083	186.944	278.932	94.9555	#REF!	175.074	2.9674	287.834	14.8368	47.4777
	2202	85320	7	5	Principal sensory trigeminal nucleus ventrolateral part	Pr5VL	Pr5	85320	0.54856	295.319	116.67	286.204	218.755	5.4689	6.4276	153.128	41.928	43.7509	136.722	229.692	78.387	#REF!	96.6166	30.9902	204.171	27.3443	34.6361
	867	85400	1132	4	Parabrachial nucleus	PB	P-sen	85400	0.7932	245.84	248.36	40.3429	81.9465	102.118	0	119.768	41.6036	84.468	335.351	293.747	214.322	#REF!	73.1215	108.422	376.954	210.54	543.369
	123	85500	867	5	Kolliker-Fuse nucleus	KF	PB	85500	0.03196	0	531.91	156.446	0	62.5782	0	93.8673	31.2891	31.2891	219.024	250.313	187.735	#REF!	125.156	187.735	625.782	281.602	344.18
	881	85600	867	5	Lateral parabrachial nucleus	LPB	PB	85600	0.42836	289.476	238.12	18.6759	37.3518	128.397	49.2444	112.055	39.6862	67.7001	380.521	387.524	249.79	#REF!	51.3587	95.7139	459.894	231.114	637.314
	860	85700	881	6	Lateral parabrachial nucleus central part	LPBC	LPB	85700	0.03628	275.634	137.82	0	0	55.1268	89.0208	0	0	27.5634	496.141	385.887	275.634	#REF!	27.5634	55.1268	385.887	110.254	937.155
	2458	85710	881	6	Lateral parabrachial nucleus crescent part	LPBCr	LPB	85710	0.04312	115.955	69.57	0	0	255.102	49.2198	208.72	46.3822	23.1911	579.777	417.44	487.013	#REF!	115.956	162.338	649.351	417.44	1461.04
	868	85800	881	6	Lateral parabrachial nucleus dorsal part	LPBD	LPB	85800	0.04168	383.877	0	71.977	23.9923	119.962	52.9501	143.954	0	71.977	431.862	287.908	359.885	#REF!	119.962	23.9923	1151.63	335.892	959.693
	875	85900	881	6	Lateral parabrachial nucleus external part	LPBE	LPB	85900	0.06832	43.911	190.28	14.637	58.548	73.185	0	131.733	29.274	73.185	585.48	600.117	409.836	#REF!	87.822	190.281	483.021	292.74	614.754
	883	86000	881	6	Lateral parabrachial nucleus superior part	LPBS	LPB	86000	0.02708	369.276	147.71	0	73.8552	110.783	39.6862	369.276	184.638	258.493	369.276	664.697	221.566	#REF!	36.9276	295.421	701.625	738.552	516.987
	891	86100	881	6	Lateral parabrachial nucleus ventral part	LPBV	LPB	86100	0.0476	546.218	273.11	21.0084	0	0	0	42.0168	21.0084	21.0084	399.16	168.067	63.0252	#REF!	0	0	357.143	84.0336	399.16
	2213	86110	881	6	Lateral parabrachial nucleus internal part	LPBI	LPB	86110	0.0346	317.919	751.45	0	28.9017	57.8035	0	0	0	28.9017	144.509	289.017	57.8035	#REF!	0	28.9017	115.607	144.509	346.821
	890	86200	867	5	Medial parabrachial nucleus	MPB	PB	86200	0.32312	219.733	241.4	55.7069	151.646	71.181	71.977	120.698	46.4224	114.508	297.103	173.31	164.026	#REF!	92.8448	120.698	244.491	179.5	445.655
	899	86300	890	6	Medial parabrachial nucleus external part	MPBE	MPB	86300	0.04412	135.993	113.33	22.6655	67.9964	0	14.637	22.6655	0	0	113.327	158.658	203.989	#REF!	22.6655	45.3309	158.658	22.6655	385.313
	398	86600	1132	4	Superior olivary complex	SOC	P-sen	86600	0.79204	196.96	178.02	324.479	300.49	95.9547	184.638	154.033	85.8542	126.256	306.803	502.5	196.96	#REF!	103.53	165.396	77.0163	231.049	314.378
	122	86700	398	5	Superior olivary complex periolivary nucleus	POR	SOC	86700	0.2092	205.545	215.11	282.027	224.665	162.524	21.0084	81.262	28.6807	119.503	315.488	463.671	219.885	#REF!	224.665	262.906	86.0421	162.524	377.629
	2207	86710	122	6	Lateroventral periolivary nucleus	LVPO	POR	86710	0.05376	55.8036	130.21	241.815	93.006	465.03	0	74.4048	18.6012	55.8036	409.226	818.452	204.613	#REF!	372.024	465.03	167.411	279.018	465.03
	2208	86720	122	6	Medioventral periolivary nucleus	MVPO	POR	86720	0.0954	188.679	335.43	251.572	314.465	73.3753	77.3706	125.786	41.9287	104.822	345.912	377.358	241.09	#REF!	283.019	230.608	73.3753	73.3753	408.805
	2209	86730	122	6	Dorsal periolivary region	DPO	POR	86730	0.06004	366.422	99.93	366.422	199.867	33.3111	45.3309	16.6556	16.6556	199.867	183.211	283.145	199.867	#REF!	0	133.244	33.3111	199.867	249.833
	2227	86740	122	6	Caudal periolivary nucleus	CPO	POR	86740	0	#DIV/0!	#DIV/0!	#DIV/0!	#DIV/0!	#DIV/0!	75.7537	#DIV/0!	#DIV/0!	#DIV/0!	#DIV/0!	#DIV/0!	#DIV/0!	#REF!	#DIV/0!	#DIV/0!	#DIV/0!	#DIV/0!	#DIV/0!
	2456	86750	398	5	Superior paraolivary nucleus	SPO	SOC	86750	0.17176	40.7545	87.33	285.282	459.944	98.9753	76.4818	180.484	87.3312	46.5766	337.68	366.791	261.993	#REF!	29.1104	110.62	69.8649	244.527	238.705
	105	86800	398	5	Medial superior olive	MSO	SOC	86800	0.01696	412.736	589.62	58.9623	235.849	117.924	37.2024	58.9623	0	176.887	471.698	766.509	176.887	#REF!	235.849	117.924	176.887	0	294.811
	114	86900	398	5	Lateral superior olive	LSO	SOC	86900	0.2642	230.886	181.68	329.296	230.886	83.2702	94.3396	211.961	132.475	158.97	352.006	651.022	128.69	#REF!	98.4103	181.68	52.9902	363.361	370.931
	2187	86910	398	5	Nucleus of the central acoustic tract	CAT	SOC	86910	0.12992	292.488	177.03	469.52	361.761	7.697	83.2778	130.85	92.3645	169.335	138.547	407.943	215.517	#REF!	0	53.8793	107.759	84.6675	200.123
	987	87000	771	3	Pons motor related	P-mot	P	87000	4.80604	129.837	199.96	342.694	170.202	349.144	#DIV/0!	130.877	42.8627	39.3255	135.038	225.549	128.38	#REF!	96.7533	119.641	131.501	137.951	288.387
	280	87100	987	4	Barrington's nucleus	Bar	P-mot	87100	0.11816	160.799	67.7	262.356	16.9262	533.175	176.887	76.1679	59.2417	42.3155	59.2417	84.631	76.1679	#REF!	143.873	490.86	583.954	440.081	736.29
	2459	87110	280	5	Barrington's nucleus dorsal part	Bard	Bar	87110	0.04376	228.519	91.41	365.631	0	845.521	41.6351	68.5558	91.4077	22.8519	0	68.5558	182.815	#REF!	205.667	776.965	731.261	525.594	822.669
	2460	87120	280	5	Barrington's nucleus ventral part	Barv	Bar	87120	0.05644	0	17.72	106.308	0	336.641	107.759	17.7179	0	0	35.4359	17.7179	0	#REF!	53.1538	283.487	425.23	248.051	584.692
	880	87200	987	4	Dorsal tegmental nucleus	DTg	P-mot	87200	0.28208	14.1804	24.82	166.619	212.706	506.948	42.6547	120.533	35.4509	0	31.9058	46.0862	14.1804	#REF!	109.898	237.521	92.1724	180.8	280.062
	2210	87210	880	5	Dorsal tegmental nucleus central part	DTgC	DTg	87210	0.06904	0	14.48	0	202.781	333.14	135.41	86.9061	72.4218	0	14.4844	28.9687	14.4844	#REF!	43.4531	43.4531	28.9687	86.9061	202.781
	2201	87220	880	5	Dorsal tegmental nucleus pericentral part	DTgP	DTg	87220	0.07972	50.1756	0	175.615	376.317	539.388	182.815	338.685	0	0	12.5439	50.1756	12.5439	#REF!	37.6317	50.1756	25.0878	50.1756	188.159
	2230	87230	880	5	Posterodorsal tegmental nucleus	PDTg	DTg	87230	0.13332	0	45	247.525	120.012	577.558	17.7179	7.5008	37.5038	0	52.5053	52.5053	15.0015	#REF!	187.519	450.045	165.017	307.531	375.038
	898	87400	987	4	Central gray	CG	P-mot	87400	0.47948	22.9415	16.68	246.1	91.7661	510.97	3.5451	129.307	27.1127	6.2568	66.739	160.591	79.2525	#REF!	145.992	354.551	256.528	246.1	440.06
	2215	87410	898	5	Central gray alpha part	CGA	CG	87410	0.09872	0	10.13	212.723	50.6483	405.186	14.4844	131.686	30.389	0	172.204	425.446	141.815	#REF!	324.149	486.224	415.316	384.927	445.705
	2216	87420	898	5	Central gray beta part	CGB	CG	87420	0.07296	0	0	274.123	205.592	548.246	0	68.5307	13.7061	0	27.4123	233.004	82.2368	#REF!	54.8246	205.592	178.18	41.1184	411.184
	2231	87430	898	5	Central gray gamma part	CGG	CG	87430	0.01808	0	0	276.549	0	497.788	0	276.549	0	0	0	110.62	0	#REF!	0	0	0	55.3097	276.549
	2221	87440	898	5	Central gray nucleus O	CGO	CG	87440	0.01408	0	0	213.068	0	852.273	14.5991	71.0227	0	0	71.0227	0	426.136	#REF!	355.114	355.114	497.159	355.114	639.205
	931	87500	987	4	Pontine nuclei	Pn	P-mot	87500	0.895	263.687	346.37	653.631	335.195	928.492	10.1297	137.43	94.9721	74.8603	140.782	313.966	207.821	#REF!	274.86	213.408	328.492	293.855	623.464
	2206	87600	987	4	Pontine reticular nucleus caudal part	PnC	P-mot	87600	1.78944	44.1479	58.68	292.829	76.5603	69.8543	0	97.796	20.6769	13.9709	108.973	160.385	65.9424	#REF!	12.2943	30.177	32.4124	64.8247	146.415
	2197	87610	1117	4	Dorsomedial tegmental area	DMTg	P-sat	87610	0.4464	11.2007	15.68	248.656	73.9247	226.255	55.3097	224.014	44.8029	40.3226	219.534	293.459	87.3656	#REF!	15.681	22.4014	76.1649	35.8423	179.212
	2220	87710	987	4	Sphenoid nucleus	Sph	P-mot	87710	0.01468	0	0	0	68.1199	136.24	0	0	0	0	0	0	0	#REF!	0	544.959	68.1199	68.1199	272.48
	318	87800	987	4	Supragenual nucleus	SGe	P-mot	87800	0.00632	0	0	0	0	1265.82	56.9832	0	0	0	0	474.683	0	#REF!	158.228	0	0	0	1107.59
	462	87900	987	4	Superior salivatory nucleus	SuS	P-mot	87900	0.03876	567.595	232.2	335.397	619.195	25.7998	32.4124	335.397	283.798	232.198	386.997	464.396	180.599	#REF!	25.7998	0	0	77.3994	51.5996
	534	88000	987	4	Supratrigeminal nucleus	Su5	P-mot	88000	0.1314	205.479	251.14	60.8828	68.4932	15.2207	80.6452	129.376	0	76.1035	243.531	258.752	334.855	#REF!	60.8828	53.2725	129.376	136.986	342.466
	574	88100	987	4	Reticulotegmental nucleus of the pons	RtTg	P-mot	88100	0.37612	199.404	630.12	531.745	321.706	656.705	0	175.476	71.7856	50.5158	138.254	398.809	212.698	#REF!	47.8571	29.246	26.5873	71.7856	228.65
	2165	88110	574	5	Reticulotegmental nucleus of the pons pericentral part	RtTgP	RtTg	88110	0.104	192.308	644.23	471.154	307.692	769.231	0	134.615	48.0769	67.3077	192.308	375	259.615	#REF!	19.2308	28.8462	28.8462	76.9231	288.462
	2166	88120	771	3	B9 serotonin cells	B9	P	88120	0.00792	631.313	883.84	1136.36	505.05	252.525	128.999	757.576	505.05	505.05	631.313	2020.2	631.313	#REF!	0	0	0	126.263	126.263
	621	88200	987	4	Motor trigeminal nucleus	5N	P-mot	88200	0.44808	156.222	296.82	185.235	147.295	11.1587	30.4414	196.393	6.6952	26.7809	243.26	256.651	120.514	#REF!	98.1968	13.3905	58.0254	11.1587	51.3301
	2204	88210	621	5	Motor trigeminal nucleus anterior digastric part	5ADi	5N	88210	0.02916	377.229	240.05	68.5871	480.11	0	29.246	342.935	0	171.468	411.523	240.055	171.468	#REF!	0	137.174	137.174	68.5871	274.348
	2453	88210	621	5	Motor trigeminal nucleus temporalis part	5Te	5N	88210	0.07996	100.05	187.59	200.1	37.5188	0	57.6923	262.631	25.0125	50.025	187.594	325.163	250.125	#REF!	125.062	0	0	0	25.0125
	2194	88220	621	5	Interfascicular trigeminar nucleus	IF5/5TT	5N	88220	0.08728	68.7443	206.23	229.148	68.7443	57.2869	0	103.116	0	0	45.8295	80.2016	57.2869	#REF!	274.977	11.4574	217.69	0	34.3721
	2454	88220	621	5	Motor trigeminal nucleus masseter part	5Ma	5N	88220	0.14428	207.929	436.65	138.619	159.412	0	60.2571	298.032	6.931	20.7929	505.961	436.651	145.55	#REF!	69.3097	0	6.931	13.8619	20.7929
	2455	88230	621	5	Motor trigeminal nucleus medial pterygoid part	5MPt	5N	88230	0.08748	125.743	274.35	251.486	148.605	0	102.881	45.7247	0	0	57.1559	125.743	11.4312	#REF!	0	0	22.8624	11.4312	45.7247
	2193	88230	987	4	Peritrigeminal zone	P5	P-mot	88230	0.22652	357.584	490.02	167.756	238.389	26.4877	62.5313	185.414	57.3901	172.17	317.853	423.804	339.926	#REF!	30.9023	13.2439	35.317	39.7316	97.1217
	1117	88300	771	3	Pons behavioral state related	P-sat	P	88300	4.70404	168.153	228.95	284.436	224.488	294.428	22.9148	167.941	86.0962	69.9399	160.5	322.914	154.548	#REF!	33.8007	71.6405	109.055	131.164	195.151
	679	88400	1117	4	Nucleus raphÈ	NR	P-sat	88400	0.70704	65.06	282.87	301.256	223.467	521.894	110.895	138.606	33.9443	12.7291	86.2752	274.383	115.977	#REF!	14.1435	15.5578	43.8448	38.1874	140.02
	137	88500	679	5	Paramedian raphÈ nucleus	PMnR	NR	88500	0.48556	53.5464	253.32	267.732	224.483	387.182	0	142.104	39.1301	14.4163	96.7955	275.97	102.974	#REF!	14.4163	14.4163	55.6059	37.0706	119.45
	130	88600	679	5	Median raphÈ nucleus	MnR	NR	88600	0.22148	90.3016	347.66	374.752	221.239	817.23	110.365	130.937	22.5754	9.0302	63.2111	270.905	144.483	#REF!	13.5452	18.0603	18.0603	40.6357	185.118
	147	88700	1117	4	Locus coeruleus	LC	P-sat	88700	0.08432	249.051	23.72	332.068	59.2979	592.979	95.0247	106.736	47.4383	47.4383	130.455	249.051	166.034	#REF!	237.192	889.469	913.188	592.979	984.345
	2284	88800	1117	4	Laterodorsal tegmental nucleus	LDT	P-sat	88800	0.56384	117.054	74.49	214.6	214.6	507.236	45.2591	211.053	177.355	83.357	125.922	209.279	152.525	#REF!	28.3768	173.808	164.94	113.507	301.504
	162	88810	2284	5	Laterodorsal tegmental nucleus dorsal part	LDTg	LDT	88810	0.42028	126.106	73.76	221.281	226.04	559.151	41.1896	207.005	168.935	78.5191	78.5191	147.521	114.21	#REF!	30.9318	197.487	199.867	111.83	330.732
	2366	88820	162	6	Laterodorsal tegmental nucleus dorsal part lateral division	LDTdl	LDTg	88820	0.19036	168.103	57.79	257.407	220.635	451.776	54.181	183.862	157.596	157.596	78.7981	199.622	141.837	#REF!	10.5064	120.824	178.609	94.5577	273.167
	2367	88830	162	6	Laterodorsal tegmental nucleus dorsal part medial division	LDTdm	LDTg	88830	0.148	101.351	67.57	135.135	304.054	777.027	272.77	243.243	195.946	20.2703	87.8378	141.892	101.351	#REF!	27.027	114.865	135.135	81.0811	263.514
	2195	88840	2284	5	Laterodorsal tegmental nucleus ventral part	LDTgV	LDT	88840	0.14356	90.5545	76.62	195.04	181.109	355.252	145.431	222.903	202.006	97.5202	264.698	390.081	264.698	#REF!	20.8972	104.486	62.6916	118.417	215.938
	146	89000	1117	4	Pontine reticular nucleus	PRNr	P-sat	89000	2.70708	233.462	289.24	306.973	263.014	203.171	118.968	165.492	90.5034	91.2422	174.358	371.988	179.16	#REF!	27.7051	42.8506	84.593	161.798	166.6
	2205	89010	146	5	Pontine reticular nucleus oral part	PnO	PRNr	89010	2.47972	253.658	311.33	291.162	283.096	215.75	168.102	176.633	97.5917	98.3982	185.908	391.577	190.747	#REF!	28.229	45.1664	91.9459	173.81	178.246
	2217	89020	146	5	Pontine reticular nucleus ventral part	PnV	PRNr	89020	0.22256	8.98634	44.93	489.756	35.9454	67.3976	94.5946	40.4385	13.4795	13.4795	49.4249	157.261	49.4249	#REF!	22.4659	17.9727	4.4932	26.959	40.4385
	2182	89030	146	5	Epirubrospinal nucleus	ERS	PRNr	89030	0.0048	208.333	208.33	0	416.667	0	222.903	208.333	0	0	0	208.333	208.333	#REF!	0	0	0	208.333	0
	2185	89040	1117	4	Medial paralemniscial nucleus	MPL	P-sat	89040	0.10436	95.8222	268.3	57.4933	153.315	86.2399	100.108	124.569	38.3289	9.5822	297.049	335.377	153.315	#REF!	249.138	220.391	402.453	105.404	191.644
	2186	89050	1117	4	Perilemniscal nucleus ventral part	PLV	P-sat	89050	0.06044	181.999	248.18	264.725	181.999	33.0907	109.287	33.0907	132.363	49.636	99.272	115.817	49.636	#REF!	49.636	66.1813	115.817	165.453	181.999
	238	89100	1117	4	Pontine raphÈ nucleus	PnR	P-sat	89100	0.03056	0	0	392.67	0	589.005	0	32.7225	0	0	163.613	196.335	65.445	#REF!	65.445	0	0	32.7225	130.89
	354	89400	1065	2	Medulla	MY	HB	89400	28.2135	65.855	101.76	146.596	80.9895	50.1887	0	104.205	49.4089	27.0083	77.7641	122.955	106.722	#REF!	37.4998	32.9275	65.7486	51.7482	179.099
	386	89500	354	3	Medulla sensory related	MY-sen	MY	89500	6.54388	41.7184	98.11	91.0775	55.9301	48.595	33.0907	59.5977	36.3699	16.9624	36.6755	49.5119	122.71	#REF!	64.7934	28.4235	101.775	23.9919	192.393
	207	89600	386	4	Area postrema	AP	MY-sen	89600	0.06656	30.0481	90.14	75.1202	0	0	0	0	0	0	0	0	15.024	#REF!	0	0	0	0	180.288
	2274	89610	386	4	Area subpostrema	SubP	MY-sen	89610	0.01372	0	72.89	145.773	0	0	32.9984	0	72.8863	0	0	0	0	#REF!	0	0	0	0	145.773
	607	89700	386	4	Cochlear nuclei	CN	MY-sen	89700	1.31868	65.2167	153.94	78.8667	55.3584	135.742	19.5603	54.6001	31.85	28.0584	32.6084	116.025	221.434	#REF!	201.717	109.958	238.117	94.0334	365.517
	112	89800	607	5	Granule cell layer of the cochlear nuclei	GrC (VCCap in 81)	CN	89800	0.178	39.3258	157.3	89.8876	22.4719	101.124	0	50.5618	16.8539	28.0899	5.618	73.0337	224.719	#REF!	129.214	89.8876	303.371	191.011	376.404
	560	89900	607	5	Ventral cochlear nucleus granule cell layer	VCAGr	CN	89900	0	#DIV/0!	#DIV/0!	#DIV/0!	#DIV/0!	#DIV/0!	0	#DIV/0!	#DIV/0!	#DIV/0!	#DIV/0!	#DIV/0!	#DIV/0!	#REF!	#DIV/0!	#DIV/0!	#DIV/0!	#DIV/0!	#DIV/0!
	96	90000	607	5	Dorsal cochlear nucleus	DC	CN	90000	0.4606	10.8554	8.68	21.7108	10.8554	149.805	8.3417	41.2505	10.8554	34.7373	19.5397	43.4216	84.6722	#REF!	95.5276	102.041	165.002	80.33	462.44
	2234	90010	96	6	Dorsal cochlear nucleus molecular layer	DCMo	DC	90010	0.14188	7.04821	0	14.0964	7.0482	176.205	11.236	28.1928	21.1446	7.0482	7.0482	84.5785	63.4339	#REF!	63.4339	140.964	169.157	105.723	500.423
	2235	90020	96	6	Dorsal cochlear nucleus fusiform layer	DCFu	DC	90020	0.09296	0	0	32.2719	0	225.904	#DIV/0!	21.5146	21.5146	32.2719	21.5146	43.0293	53.7866	#REF!	86.0585	32.2719	139.845	75.3012	505.594
	2236	90030	96	6	Dorsal cochlear nucleus deep layer	DCDp	DC	90030	0.12212	0	16.38	16.3773	8.1887	139.207	4.3422	40.9433	0	8.1887	16.3773	32.7547	57.3207	#REF!	90.0753	90.0753	122.83	98.264	458.565
	101	90100	607	5	Ventral cochlear nucleus	VC	CN	90100	0.68008	108.811	251.44	114.692	94.1066	135.278	7.0482	64.6983	49.9941	23.5266	48.5237	176.45	313.198	#REF!	292.613	120.574	270.556	77.932	297.024
	2238	90110	101	6	Ventral cochlear nucleus anterior part	VCA	VC	90110	0.52624	140.62	315.45	146.321	112.116	142.52	0	79.8115	34.2049	19.0027	58.9085	201.429	374.354	#REF!	307.844	125.418	300.243	77.9112	328.747
	2237	90120	101	6	Ventral cochlear nucleus posterior part	VCP	VC	90120	0.06628	0	30.18	15.0875	15.0875	75.4375	8.1887	30.175	150.875	45.2625	30.175	120.7	90.525	#REF!	196.138	15.0875	120.7	15.0875	211.225
	2243	90130	101	6	Ventral cochlear nucleus posterior part octopus cell area	VCPO	VC	90130	0.08756	0	34.26	0	45.683	137.049	10.2929	0	68.5244	34.2622	0	68.5244	114.207	#REF!	274.098	171.311	205.573	125.628	171.311
	720	90200	386	4	Dorsal column nuclei	DCN	MY-sen	90200	0.3662	0	10.92	81.9224	0	0	13.3019	0	2.7307	0	0	0	101.038	#REF!	0	0	0	0	409.612
	711	90300	720	5	Cuneate nucleus	Cu	DCN	90300	0.33156	0	9.05	84.4493	0	0	0	0	3.016	0	0	0	102.546	#REF!	0	0	0	0	428.278
	2285	90310	711	6	Cuneate nucleus dorsal part	CuD	Cu	90310	0.01412	0	0	212.465	0	0	0	0	0	0	0	0	141.643	#REF!	0	0	0	0	849.858
	2278	90320	711	6	Cuneate nucleus rotundus part	CuR	Cu	90320	0.05852	0	51.26	68.3527	0	0	0	0	0	0	0	0	51.2645	#REF!	0	0	0	0	393.028
	1039	90400	720	5	Gracile nucleus	Gr	DCN	90400	0.03464	0	28.87	57.7367	0	0	0	0	0	0	0	0	86.6051	#REF!	0	0	0	0	230.947
	903	90500	386	4	External cuneate nucleus	ECu	MY-sen	90500	0.19736	35.4682	10.13	106.404	55.7357	202.675	0	81.0701	10.1338	0	60.8026	0	76.0032	#REF!	5.0669	25.3344	70.9364	15.2006	511.755
	642	90600	386	4	Nucleus of the trapezoid body	Tz	MY-sen	90600	0.16556	0	0	525.489	42.2807	66.4412	0	36.2406	6.0401	12.0802	157.043	205.364	72.4813	#REF!	114.762	96.6417	54.361	84.5615	229.524
	2249	90610	386	4	Trigeminal-solitary transition zone	5Sol	MY-sen	90610	0.10064	59.6184	208.66	228.537	49.682	29.8092	0	89.4277	9.9364	19.8728	59.6184	0	208.665	#REF!	59.6184	0	109.3	19.8728	218.601
	651	90700	386	4	Solitary nucleus	Sol	MY-sen	90700	0.6984	1.43184	104.52	120.275	20.0458	0	20.2675	27.205	50.1145	2.8637	12.8866	10.0229	78.7514	#REF!	1.4318	4.2955	11.4548	1.4318	257.732
	659	90800	651	5	Solitary nucleus central part	SolCe	Sol	90800	0.01436	0	0	0	0	0	0	0	69.6379	0	0	0	0	#REF!	0	0	0	0	348.189
	666	90900	651	5	Solitary nucleus commissural part	SolC	Sol	90900	0.05372	0	18.62	167.535	0	0	19.8728	0	0	0	0	0	0	#REF!	0	0	0	0	93.0752
	674	91000	651	5	Solitary nucleus gelatinous part	SolG	Sol	91000	0.0174	0	574.71	229.885	0	0	1.4318	0	57.4713	0	0	0	0	#REF!	0	0	0	0	632.184
	2250	91010	651	5	Solitary nucleus intermediate part	SolIM	Sol	91010	0.06336	0	78.91	94.697	15.7828	0	0	0	110.48	15.7828	47.3485	94.697	94.697	#REF!	15.7828	0	0	0	268.308
	682	91100	651	5	Solitary nucleus lateral part	SolL	Sol	91100	0.09504	0	21.04	115.741	31.5657	0	0	10.5219	42.0875	0	10.5219	0	168.35	#REF!	0	0	63.1313	0	147.306
	691	91200	651	5	Solitary nucleus medial part	SolM	Sol	91200	0.16676	0	167.91	125.93	17.9899	0	0	23.9866	17.9899	0	0	0	23.9866	#REF!	0	5.9966	0	0	239.866
	2263	91210	651	5	Solitary nucleus ventral part	SolV	Sol	91210	0.09528	0	199.41	167.926	31.4861	0	0	41.9815	83.9631	10.4954	20.9908	0	104.954	#REF!	0	20.9908	0	0	283.375
	2273	91220	651	5	Solitary nucleus ventrolateral part	SolVL	Sol	91220	0.0376	0	53.19	159.575	0	0	0	0	0	0	0	0	132.979	#REF!	0	0	0	0	425.532
	2271	91230	651	5	Solitary nucleus dorsolateral part	SolDL	Sol	91230	0.0516	0	0	38.7597	0	0	0	0	96.8992	0	0	0	174.419	#REF!	0	0	0	0	329.457
	2264	91240	651	5	Solitary nucleus dorsomedial part	SolDM	Sol	91240	0.08104	0	61.7	86.3771	49.3583	0	0	98.7167	61.6979	0	37.0188	0	49.3583	#REF!	0	0	12.3396	12.3396	222.113
	2265	91250	651	5	Solitary nucleus interstitial part	SolI	Sol	91250	0.01196	0	0	0	0	0	0	0	0	0	0	0	0	#REF!	0	0	0	0	585.284
	2470	91260	651	5	Soltary nucleus rostrolateral part	SolRL	Sol	91260	0.0056	178.571	178.57	0	0	0	0	357.143	178.571	0	0	178.571	178.571	#REF!	0	0	178.571	0	0
	429	91300	386	4	Spinal trigeminal nucleus caudal part	Sp5C	MY-sen	91300	0.71812	0	1.39	15.3178	0	4.1776	12.3396	0	0	0	0	0	34.8131	#REF!	0	0	0	0	25.0654
	437	91400	386	4	Spinal trigeminal nucleus interpolar part	Sp5I	MY-sen	91400	1.80988	2.21009	62.99	51.3846	3.3151	38.6766	0	24.311	30.9413	0	1.6576	3.3151	134.816	#REF!	13.8131	1.6576	46.9644	2.7626	106.637
	445	91500	386	4	Spinal trigeminal nucleus oral part	Sp5O	MY-sen	91500	1.08288	154.218	200.39	125.591	230.866	11.0816	0	206.856	91.4229	62.7955	130.208	114.51	92.3463	#REF!	97.8871	12.9285	207.779	7.3877	56.3313
	45	91900	445	5	Dorsomedial spinal trigeminal nucleus	DMSp5	Sp5O	91900	0.5284	111.658	198.71	136.26	189.251	3.785	0	191.143	58.6677	52.9902	162.756	124.905	117.335	#REF!	138.153	1.8925	189.251	11.355	81.3777
	2270	92010	386	4	Paratrigeminal nucleus	Pa5	MY-sen	92010	0.00588	0	0	0	0	0	2.2101	0	0	0	0	0	170.068	#REF!	0	0	0	0	0
	370	92200	354	3	Medulla motor related	MY-mot	MY	92200	20.3664	72.5705	106.3	155.943	87.6444	40.1151	97.8871	120.345	54.747	29.7549	89.7066	140.182	101.491	#REF!	17.9708	21.7515	52.3902	44.4359	164.339
	2198	92210	370	4	Subcoeruleus nucleus alpha part	SubCA	MY-mot	92210	0.05312	188.253	131.78	207.078	75.3012	75.3012	131.777	320.03	18.8253	169.428	169.428	470.632	263.554	#REF!	18.8253	37.6506	18.8253	18.8253	414.157
	2199	92220	370	4	Subcoeruleus nucleus dorsal part	SubCD	MY-mot	92220	0.2396	141.903	146.08	125.209	475.793	200.334	425.709	454.925	133.556	141.903	308.848	688.648	271.286	#REF!	58.4307	70.9516	137.73	70.9516	221.202
	2200	92230	370	4	Subcoeruleus nucleus ventral part	SubCV	MY-mot	92230	0.48568	282.079	212.07	220.31	226.487	47.3563	137.951	247.076	86.4767	96.7715	269.725	337.671	282.079	#REF!	37.0614	189.425	90.5946	459.15	195.602
	653	92300	370	4	Abducens nucleus	6N	MY-mot	92300	0.0432	0	0	277.778	23.1481	370.37	0	92.5926	0	0	46.2963	138.889	69.4444	#REF!	0	23.1481	46.2963	0	69.4444
	2229	92310	653	5	Paraabducens nucleus	Pa6	6N	92310	0.02788	0	0	358.68	35.868	322.812	0	107.604	0	0	35.868	179.34	107.604	#REF!	0	0	0	0	107.604
	2228	92400	370	4	Abducens nucleus retractor bulbi part	6RB	MY-mot	92400	0.01184	253.378	253.38	168.919	337.838	0	0	337.838	84.4595	84.4595	422.297	506.757	0	#REF!	0	0	0	84.4595	84.4595
	661	92500	370	4	Facial nucleus	7N	MY-mot	92500	0.7722	106.19	129.5	200.725	217.56	3.885	28.49	281.015	115.255	88.0601	288.785	455.841	187.775	#REF!	2.59	40.145	46.62	260.295	189.07
	2226	92510	661	5	Perifacial zone	P7	7N	92510	0.17516	194.108	97.05	205.526	222.654	0	62.7997	291.162	125.6	114.181	376.798	553.779	171.272	#REF!	0	45.6725	17.1272	319.708	131.309
	2462	92520	661	5	Facial nucleus lateral subnucleus	7L	7N	92520	0.07988	225.338	200.3	125.188	187.782	0	25.0376	200.3	162.744	225.338	262.894	400.601	187.782	#REF!	12.5188	75.1127	150.225	237.857	162.744
	2463	92530	661	5	Facial nucleus dorsolateral subnucleus	7DL	7N	92530	0.04152	168.593	96.34	313.102	216.763	0	0	674.374	337.187	144.509	361.272	264.933	72.2543	#REF!	24.0848	72.2543	48.1696	0	24.0848
	2464	92540	661	5	Facial nucleus ventral intermediate subnucleus	7VI	7N	92540	0.04212	47.4834	332.38	94.9668	118.709	0	0	142.45	23.7417	118.709	332.384	308.642	356.125	#REF!	0	71.2251	0	474.834	332.384
	2465	92550	661	5	Facial nucleus dorsal intermediate subnucleus	7DI	7N	92550	0.07676	13.0276	156.33	221.47	182.387	0	0	182.387	78.1657	91.1933	104.221	325.69	117.249	#REF!	0	26.0552	13.0276	247.525	26.0552
	2466	92560	661	5	Facial nucleus dorsomedial subnucleus	7DM	7N	92560	0.04704	0	42.52	382.653	361.395	21.2585	0	170.068	63.7755	21.2585	191.327	340.136	127.551	#REF!	0	42.517	106.293	212.585	191.327
	2467	92570	661	5	Facial nucleus ventromedial subnucleus	7VM	7N	92570	0.04116	0	0	291.545	461.613	0	24.2954	145.773	0	0	267.25	364.432	194.363	#REF!	0	24.2954	145.773	218.659	340.136
	576	92600	370	4	Facial motor nucleus stylohyoid part	7SH	MY-mot	92600	0.02304	43.4028	43.4	0	173.611	0	0	43.4028	43.4028	43.4028	86.8056	86.8056	43.4028	#REF!	0	0	0	0	0
	640	92700	370	4	Nucleus of the origin of efferents of the vestibular nerve	EVe	MY-mot	92700	0.01568	0	63.78	255.102	0	637.755	0	255.102	0	0	63.7755	0	127.551	#REF!	0	0	63.7755	0	637.755
	2472	92800	370	4	Ambiguus nucleus	Amb	MY-mot	92800	0.1066	9.38086	18.76	243.902	9.3809	28.1426	0	9.3809	0	0	0	0	37.5235	#REF!	0	0	0	0	121.951
	135	92810	2472	5	Ambiguus nucleus compact part	AmbC	Amb	92810	0.07008	14.2694	28.54	256.849	14.2694	42.8082	0	14.2694	0	0	0	0	57.0776	#REF!	0	0	0	0	71.347
	2277	92820	2472	5	Ambiguus nucleus loose part	AmbL	Amb	92820	0.01744	0	0	458.716	0	0	0	0	0	0	0	0	0	#REF!	0	0	0	0	57.3394
	2471	92830	2472	5	Retroambiguus nucleus	Rambn	Amb	92830	0.01908	0	0	0	0	0	0	0	0	0	0	0	0	#REF!	0	0	0	0	366.876
	839	93100	370	4	Vagus nerve nucleus	10N	MY-mot	93100	0.10296	0	126.26	106.838	0	0	0	0	0	0	0	0	0	#REF!	0	9.7125	0	0	310.8
	1048	93300	370	4	Gigantocellular reticular nucleus	Gi	MY-mot	93300	2.65072	0.754512	28.67	168.256	23.7671	16.222	1.8863	25.2762	13.9585	1.8863	41.1209	42.2527	12.8267	#REF!	3.7726	12.0722	11.6949	7.5451	63.0018
	2223	93310	1048	5	Gigantocellular reticular nucleus alpha part	GiA	Gi	93310	0.18984	0	10.54	273.915	21.0704	42.1408	0	0	0	0	68.4787	79.0139	26.338	#REF!	0	5.2676	89.5491	10.5352	89.5491
	2224	93320	1048	5	Gigantocellular reticular nucleus ventral part	GiV	Gi	93320	0.2112	0	0	402.462	18.9394	4.7348	0	0	0	0	4.7348	4.7348	0	#REF!	0	0	0	4.7348	23.6742
	83	93500	370	4	Inferior olivary nucleus	IO	MY-mot	93500	0.7786	14.1279	3.85	118.161	10.2749	0	35.962	53.943	106.602	0	10.2749	59.0804	29.5402	#REF!	0	0	0	2.5687	199.075
	2253	93510	83	5	Inferior olive subnucleus A of medial nucleus	IOA	IO	93510	0.02392	0	41.81	0	0	0	0	0	0	0	0	0	0	#REF!	0	0	0	0	543.478
	2254	93520	83	5	Inferior olive subnucleus B of medial nucleus	IOB	IO	93520	0.08116	0	0	61.6067	0	0	0	24.6427	0	0	0	0	0	#REF!	0	0	0	0	492.854
	2255	93530	83	5	Inferior olive subnucleus C of medial nucleus	IOC	IO	93530	0.0734	0	0	13.624	0	0	0	0	0	0	0	0	0	#REF!	0	0	0	0	163.488
	2256	93540	83	5	Inferior olive dorsal nucleus	IOD	IO	93540	0.12668	0	0	118.409	7.8939	0	23.6817	31.5756	252.605	0	15.7878	71.0452	47.3634	#REF!	0	0	0	0	268.393
	2257	93550	83	5	Inferior olive dorsomedial cell group	IODM	IO	93550	0.0216	0	0	231.482	0	0	0	0	0	0	0	0	0	#REF!	0	0	0	46.2963	0
	2258	93560	83	5	Inferior olive principal nucleus	IOPr	IO	93560	0.09452	0	0	105.798	10.5798	0	95.2179	63.4786	148.117	0	0	52.8989	10.5798	#REF!	0	0	0	0	31.7393
	2259	93570	83	5	Inferior olive ventrolateral protrusion	IOVL	IO	93570	0.00252	0	0	0	0	0	0	0	0	0	0	0	0	#REF!	0	0	0	0	0
	2260	93580	83	5	Inferior olive cap of Kooy of the medial nucleus	IOK	IO	93580	0.0184	0	0	54.3478	0	0	0	0	0	0	0	0	0	#REF!	0	0	0	0	0
	2261	93590	83	5	Inferior olive beta subnucleus of the medial nucleus	IOBe	IO	93590	0.02548	0	0	78.4929	0	0	0	0	0	0	0	0	39.2465	#REF!	0	0	0	0	0
	2262	93595	83	5	Inferior olive medial nucleus	IOM	IO	93595	0.03368	0	0	385.986	0	0	148.456	0	0	0	0	0	29.6912	#REF!	0	0	0	0	29.6912
	136	93600	370	4	Intermediate reticular nucleus	IRt	MY-mot	93600	3.44476	89.7015	184.05	192.466	101.894	11.3215	24.6752	114.086	61.2525	21.4819	63.8651	110.893	91.4432	#REF!	3.4836	2.6127	9.5798	18.2886	90.5723
	2225	93610	136	5	Intermediate reticular nucleus alpha part	IRtA	IRt	93610	0.52744	297.664	255.95	174.427	293.872	5.6879	51.1907	216.138	81.5259	96.6935	170.636	252.161	227.514	#REF!	11.3757	1.896	13.2717	26.5433	53.0866
	106	93700	370	4	Inferior salivatory nucleus	IS	MY-mot	93700	0.06092	16.415	410.37	180.565	131.32	0	49.2449	147.735	82.0749	131.32	32.8299	131.32	262.639	#REF!	16.415	0	0	16.415	49.2449
	203	93800	370	4	Linear nucleus of the hindbrain	Li	MY-mot	93800	0.02784	0	35.92	71.8391	0	0	0	0	71.8391	0	0	0	0	#REF!	0	0	0	0	0
	235	93900	370	4	Lateral reticular nucleus	LRt	MY-mot	93900	0.39228	0	165.7	104.517	0	56.0824	0	53.5332	35.6888	0	0	0	50.984	#REF!	2.5492	0	0	0	285.51
	963	94100	235	5	Lateral reticular nucleus parvicellular part	LRtPC	LRt	94100	0.00328	0	609.76	0	0	0	0	0	0	0	0	0	0	#REF!	0	0	0	0	304.878
	395	94300	370	4	Paramedian reticular nucleus	PMn	MY-mot	94300	2.49904	0	22.81	38.8149	0.4002	1.6006	0	0.8003	4.0015	0	0	0	20.4078	#REF!	0	0	0	0	124.448
	1098	94400	395	5	Medullary reticular nucleus dorsal part	MdD	PMn	94400	1.09488	0	42.01	59.3672	0	3.6534	0	0	0	0	0	0	42.0137	#REF!	0	0	0	0	164.402
	1107	94500	395	5	Medullary reticular nucleus ventral part	MdV	PMn	94500	0.89852	0	10.02	13.3553	0	0	0	0	0	0	0	0	4.4518	#REF!	0	0	0	0	103.504
	852	94600	370	4	Parvicellular reticular nucleus	PCRt	MY-mot	94600	3.03268	137.832	173.11	168.828	159.265	22.4224	82.1056	211.364	80.7866	44.1853	137.832	181.688	192.569	#REF!	28.028	21.7629	76.5	27.0388	93.6465
	2214	94610	852	5	Parvicellular reticular nucleus alpha part	PCRtA	PCRt	94610	1.8418	226.952	220.98	203.062	262.243	8.6872	134.651	340.428	114.562	72.7549	226.952	299.164	201.976	#REF!	38.0063	35.8345	87.4145	43.4358	85.2427
	2211	94620	370	4	Trigeminal transition zone	5Tr	MY-mot	94620	0.0904	221.239	287.61	66.3717	77.4336	0	88.4956	298.673	88.4956	77.4336	320.796	508.85	276.549	#REF!	188.053	0	165.929	22.1239	66.3717
	859	94700	370	4	Parasolitary nucleus	PSol	MY-mot	94700	0.02012	0	0	149.105	0	0	0	0	149.105	0	0	0	347.913	#REF!	0	0	0	0	198.807
	938	94800	370	4	Lateral paragigantocellular nucleus	LPGi	MY-mot	94800	0.79624	5.02361	15.07	175.826	32.6535	26.374	2.5118	80.3778	55.2597	2.5118	61.5392	92.9368	32.6535	#REF!	0	6.2795	17.5826	15.0708	251.18
	2248	94810	938	5	Lateral paragigantocellular nucleus external part	LPGiE	LPGi	94810	0.07916	37.8979	12.63	252.653	126.326	12.6326	12.6326	126.326	50.5306	0	25.2653	138.959	101.061	#REF!	0	0	25.2653	25.2653	656.897
	970	94900	938	5	Dorsal paragigantocellular nucleus	DPGi	LPGi	94900	0.33384	0	5.99	161.754	2.9954	5.9909	0	11.9818	29.9545	5.9909	29.9545	32.9499	11.9818	#REF!	0	2.9954	8.9863	0	50.9226
	978	95000	938	5	Paragigantocellular reticular nucleus lateral part	PGRNl	LPGi	95000	0	#DIV/0!	#DIV/0!	#DIV/0!	#DIV/0!	#DIV/0!	#DIV/0!	#DIV/0!	#DIV/0!	#DIV/0!	#DIV/0!	#DIV/0!	#DIV/0!	#REF!	#DIV/0!	#DIV/0!	#DIV/0!	#DIV/0!	#DIV/0!
	2252	95010	370	6	Caudoventrolateral reticular nucleus	CVL	PGRNl	95010	0.10512	28.5388	218.8	142.694	19.0259	19.0259	28.5388	171.233	47.5647	0	19.0259	199.772	47.5647	#REF!	0	9.5129	85.6164	0	275.875
	2469	95020	370	6	Rostroventrolateral reticular nucleus	RVL	PGRNl	95020	0.00996	200.803	301.2	401.606	100.402	0	0	100.402	100.402	0	100.402	401.606	0	#REF!	0	100.402	0	0	0
	2269	95030	370	6	Rostral ventral respiratory group	RVRG	PGRNl	95030	0.0432	0	69.44	208.333	0	69.4444	0	115.741	0	0	0	0	92.5926	#REF!	0	0	0	0	115.741
	2468	95040	370	4	Botzinger complex	Bo	MY-mot	95040	0.03784	79.2812	105.71	132.135	26.4271	0	0	184.989	237.844	0	0	264.271	0	#REF!	0	52.8541	26.4271	0	211.417
	2251	95050	2468	5	Pre-Botzinger complex	PrBo	Bo	95050	0.03108	64.3501	96.53	160.875	32.175	0	0	225.225	225.225	0	0	321.75	0	#REF!	0	0	32.175	0	257.4
	154	95100	370	4	Perihypoglossal nuclei	PHY	MY-mot	95100	0.448	2.23214	22.32	122.768	24.5536	232.143	0	4.4643	4.4643	0	13.3929	37.9464	13.3929	#REF!	13.3929	17.8571	66.9643	49.1071	178.571
	161	95200	154	5	Intercalated nucleus	In	PHY	95200	0.08236	0	97.13	24.2836	0	0	0	0	12.1418	0	0	0	36.4254	#REF!	0	0	0	0	121.418
	2276	95210	161	6	Intermedius nucleus of the medulla	InM	In	95210	0.02832	0	70.62	0	0	0	0	0	0	0	0	0	0	#REF!	0	0	0	0	70.6215
	177	95300	154	5	Nucleus of Roller	Ro	PHY	95300	0.04156	0	0	0	0	0	0	0	24.0616	0	0	0	0	#REF!	0	0	0	0	24.0616
	169	95400	154	5	Prepositus nucleus	Pr	PHY	95400	0.32408	3.08566	6.17	163.54	33.9422	320.908	0	6.1713	0	0	18.5139	52.4562	9.257	#REF!	18.5139	24.6853	92.5697	67.8845	212.91
	1069	95600	370	4	Parapyramidal nucleus	PPy	MY-mot	95600	0.03172	31.5259	0	220.681	31.5259	31.5259	0	0	0	0	31.5259	94.5776	63.0517	#REF!	0	0	94.5776	31.5259	504.414
	701	95900	370	4	Vestibulocerebellar nucleus	VeCb	MY-mot	95900	3.34356	122.026	120.53	191.413	118.138	115.745	50.5449	192.908	78.6587	62.8073	153.13	252.725	158.813	#REF!	58.9192	49.0495	155.523	72.0789	338.86
	217	96000	701	5	Superior vestibular nucleus	SuVe	VeCb	96000	0.35584	132.082	95.55	81.4973	64.6358	53.3948	19.6718	132.082	14.0513	36.5333	103.979	379.384	162.995	#REF!	39.3435	67.446	112.41	53.3948	444.02
	209	96050	701	5	Lateral vestibular nucleus	LVe	VeCb	96050	0.32148	68.4335	71.54	121.314	59.1017	6.2212	40.438	202.19	77.7653	15.5531	239.517	348.389	220.854	#REF!	15.5531	15.5531	130.646	21.7743	332.836
	202	96100	701	5	Medial vestibular nucleus	MVe	VeCb	96100	1.84864	114.138	160.12	220.703	121.711	132.53	56.2576	183.378	77.3542	75.1904	118.466	263.437	121.17	#REF!	73.0267	58.4213	143.349	81.6817	341.332
	2232	96110	202	6	Medial vestibular nucleus magnocellular part	MVeMC	MVe	96110	0.55436	110.037	248.94	153.33	160.546	16.2349	88.3902	285.013	93.8019	140.703	229.093	387.835	257.955	#REF!	129.88	12.6272	73.9592	23.4505	167.761
	2233	96120	202	6	Medial vestibular nucleus parvicellular part	MVePC	MVe	96120	0.966	104.555	95.24	275.362	100.414	222.567	45.5487	156.315	84.8861	42.4431	67.2878	234.99	48.6542	#REF!	59.0062	84.8861	177.019	127.329	437.888
	2368	96130	2233	7	Medial vestibular nucleus parvicellular part dorsal	MVePd	MVePC	96130	0.29504	176.247	115.24	271.15	135.575	210.141	77.9555	189.805	138.964	71.1768	54.2299	247.424	61.0087	#REF!	94.9024	101.681	172.858	132.185	681.264
	2369	96140	2233	7	Medial vestibular nucleus parvicellular part ventral	MVePv	MVePC	96140	0.16504	66.6505	48.47	278.72	24.2365	84.8279	66.6505	145.419	36.3548	54.5322	30.2957	345.371	48.4731	#REF!	6.0591	0	24.2365	12.1183	284.779
	225	96200	701	5	Spinal vestibular nucleus	SpVe	VeCb	96200	0.6596	130.382	50.03	241.055	168.284	136.446	53.0625	272.893	130.382	68.2232	242.571	78.8357	219.83	#REF!	36.3857	27.2893	221.346	50.0303	260.764
	2268	96310	701	5	F cell group of the vestibular complex	FVe	VeCb	96310	0.0116	344.828	0	172.414	86.2069	258.621	0	172.414	0	0	172.414	0	258.621	#REF!	0	0	0	0	258.621
	2218	96320	701	5	Paracochlear glial substance	PCGS	VeCb	96320	0.02632	0	0	113.982	0	37.9939	0	151.976	0	0	0	151.976	113.982	#REF!	0	37.9939	265.957	0	455.927
	765	96400	370	4	Nucleus X	X	MY-mot	96400	0.1074	195.531	55.87	232.775	148.976	65.1769	111.732	204.842	0	37.2439	83.7989	18.622	242.086	#REF!	0	46.5549	297.952	46.5549	316.574
	2267	96410	370	4	Matrix region of the medulla	Mx	MY-mot	96410	0.18452	27.0973	16.26	135.487	10.8389	32.5168	21.6779	37.9363	16.2584	0	5.4195	0	65.0336	#REF!	10.8389	5.4195	97.5504	10.8389	357.685
	773	96500	370	4	Hypoglossal nucleus	12N	MY-mot	96500	0.34268	0	46.69	46.6908	0	2.9182	0	0	8.7545	0	0	0	2.9182	#REF!	0	0	0	0	81.7089
	2272	96510	370	4	Central cervical nucleus of the spinal cord	CeCv	MY-mot	96510	0.00828	0	0	0	0	0	0	0	0	0	0	0	0	#REF!	0	0	0	0	362.319
	781	96600	370	4	Nucleus Y of the vestibular complex	Y	MY-mot	96600	0.02256	0	0	88.6525	0	44.3262	0	0	0	0	265.957	221.631	44.3262	#REF!	0	44.3262	132.979	177.305	620.567
	379	96800	354	3	Medulla behavioral state related	MY-sat	MY	96800	0.3782	5.28821	5.29	319.937	18.5087	79.3231	5.2882	7.9323	10.5764	2.6441	31.7292	97.8318	29.0851	#REF!	50.238	87.2554	29.0851	68.7467	84.6113
	206	96900	379	4	RaphÈ magnus nucleus	RMg	MY-sat	96900	0.29444	6.79256	6.79	285.287	20.3777	74.7181	0	10.1888	0	3.3963	37.3591	95.0958	16.9814	#REF!	23.7739	30.5665	27.1702	47.5479	57.7367
	2212	96910	206	5	RaphÈ interpositus nucleus	RIP	RMg	96910	0.04944	0	20.23	80.9061	40.4531	60.6796	0	60.6796	0	0	0	80.9061	0	#REF!	40.4531	20.2265	40.4531	20.2265	20.2265
	230	97000	379	4	RaphÈ pallidus nucleus	RPa	MY-sat	97000	0.05772	0	0	554.401	17.325	138.6	34.65	0	69.3001	0	17.325	155.925	103.95	#REF!	207.9	415.8	51.9751	207.9	259.875
	222	97100	379	4	RaphÈ obscurus nucleus	ROb	MY-sat	97100	0.02604	0	0	192.012	0	0	0	0	0	0	0	0	0	#REF!	0	0	0	0	0
	1009	97200	997		fiber tracts	fiber_tracts	root	97200	50.0448	189.81	258.35	248.717	170.127	213.628	134.439	170.727	138.116	143.831	190.549	263.464	199.221	#REF!	101.549	100.39	166.71	152.283	248.197
	2155	97210	997		basilar artery	bas	fiber_tracts	97210	0.00228	1315.79	438.6	1315.79	438.596	438.596	0	438.596	0	0	877.193	438.596	0	#REF!	0	0	877.193	438.596	0
	967	97300	1009		cranial nerves	cm	fiber_tracts	97300	13.8205	163.887	220.54	207.952	146.739	220.615	109.765	140.444	101.227	118.303	147.39	219.24	153.757	#REF!	157.52	125.032	170.616	195.724	255.418
	949	97500	967		vomeronasal nerve	vn	cm	97500	0.00916	0	0	0	0	218.341	0	0	0	0	0	0	0	#REF!	0	545.851	327.511	109.17	764.192
	840	97600	967		olfactory nerve	on	cm	97600	4.74488	158.697	292.95	201.48	127.506	168.814	181.037	176.19	109.803	162.069	174.925	222.977	165.652	#REF!	85.1444	125.609	110.646	166.495	227.825
	1016	97700	840		olfactory nerve layer	onl	on	97700	2.10976	9.47975	150.73	24.1734	53.5606	89.1097	87.6877	106.173	61.6184	29.3872	46.9248	97.6414	21.3294	#REF!	102.381	151.202	53.0866	114.231	237.942
	21	97800	840		lateral olfactory tract general	lotg	In	97800	1.19132	159.487	214.89	241.749	78.9041	292.952	214.888	170.399	89.8163	209.851	217.406	239.23	170.399	#REF!	128.429	142.699	243.428	397.878	368.499
	2279	97900	21		dorsal lateral olfactory tract	dlo	lotg	97900	0.09308	0	0	0	0	204.125	10.7434	32.2303	64.4607	64.4607	64.4607	0	0	#REF!	10.7434	150.408	193.382	96.691	150.408
	665	97900	21		lateral olfactory tract	lo	lotg	97900	1.09824	173.004	233.1	262.238	85.5915	300.481	232.19	182.11	91.9653	222.174	230.369	259.506	184.841	#REF!	138.403	142.046	247.669	423.405	386.983
	459	98100	21		accessory olfactory tract	aot	lotg	98100	0	#DIV/0!	#DIV/0!	#DIV/0!	#DIV/0!	#DIV/0!	#DIV/0!	#DIV/0!	#DIV/0!	#DIV/0!	#DIV/0!	#DIV/0!	#DIV/0!	#REF!	#DIV/0!	#DIV/0!	#DIV/0!	#DIV/0!	#DIV/0!
	900	98200	840		anterior commissure anterior part	aca	In	98200	0.52904	773.098	1052.85	740.965	510.358	221.155	472.554	478.225	415.848	497.127	631.332	757.977	718.282	#REF!	47.2554	130.425	154.998	88.8402	149.327
	2317	98210	840		anterior commissure intrabulbar part	aci	In	98210	0.91476	146.487	283.13	245.966	139.927	160.698	183.655	170.536	69.9637	212.077	150.859	181.468	172.723	#REF!	10.9318	41.541	44.8205	30.6091	66.6842
	848	98300	967		optic nerve	2n	cm	98300	2.24936	286.304	309.87	333.428	231.621	468.133	138.706	173.383	177.384	199.612	241.847	316.534	237.845	#REF!	426.788	276.079	469.022	524.149	571.718
	916	98500	848		brachium of the superior colliculus	bsc	2n	98500	0.53924	183.592	328.24	196.573	302.277	589.719	140.939	270.751	144.648	150.211	254.061	281.878	211.409	#REF!	354.202	278.169	513.686	550.775	689.86
	336	98600	848		commissure of the superior colliculus	csc	2n	98600	0.02564	390.016	351.01	585.023	819.033	1014.04	1170.05	1248.05	936.037	1170.05	1833.07	1638.07	507.02	#REF!	78.0031	156.006	234.009	234.009	390.016
	117	98700	848		optic chiasm	och	2n	98700	0.01796	1057.91	1224.94	1280.62	1169.27	890.869	723.831	612.472	946.548	1002.23	946.548	334.076	1002.23	#REF!	1280.62	0	55.6793	445.434	835.189
	125	98800	848		optic tract	opt	2n	98800	1.42756	280.899	268.99	363.557	170.22	400.684	112.78	114.181	161.815	193.337	181.429	299.112	222.057	#REF!	422.399	260.584	425.901	524.672	525.372
	2040	98810	848		supraoptic decussation	sox	2n	98810	0.23896	481.252	439.4	364.078	305.49	506.361	133.914	159.022	205.055	184.131	351.523	355.708	305.49	#REF!	590.057	397.556	682.122	497.991	581.687
	832	99000	967		oculomotor nerve	3n	cm	99000	0.63512	92.8958	136.98	218.856	148.004	140.131	132.258	187.366	182.643	149.578	193.664	203.111	108.641	#REF!	29.9156	37.7881	86.5978	66.1292	154.302
	62	99100	832		medial longitudinal fasciculus	mlf	3n	99100	0.56792	56.346	65.15	149.669	91.5622	68.6716	29.9338	84.5189	88.0406	52.8243	47.5419	96.8446	29.9338	#REF!	3.5216	12.3257	19.3689	21.1297	102.127
	158	99200	832		posterior commissure	pc	3n	99200	0.0672	401.786	744.05	803.571	625	744.048	997.024	1056.55	982.143	967.262	1428.57	1101.19	773.809	#REF!	252.976	252.976	654.762	446.429	595.238
	911	99300	967		trochlear nerve	4n	cm	99300	0	#DIV/0!	#DIV/0!	#DIV/0!	#DIV/0!	#DIV/0!	#DIV/0!	#DIV/0!	#DIV/0!	#DIV/0!	#DIV/0!	#DIV/0!	#DIV/0!	#REF!	#DIV/0!	#DIV/0!	#DIV/0!	#DIV/0!	#DIV/0!
	901	99600	967		trigeminal nerve	5n	cm	99600	2.25104	163.036	96.4	117.723	131.05	68.8571	45.3124	91.9575	50.199	36.4276	68.4128	154.151	93.7345	#REF!	159.038	71.9667	129.274	67.0801	132.827
	93	99700	901		motor root of the trigeminal nerve	m5	5n	99700	0.06856	43.7573	58.34	102.1	58.3431	393.816	0	0	0	0	14.5858	43.7573	87.5146	#REF!	204.201	175.029	291.715	102.1	175.029
	229	99800	901		sensory root of the trigeminal nerve	s5	5n	99800	2.18248	166.783	97.6	118.214	133.335	58.6489	46.7358	94.8462	51.776	37.5719	70.1037	157.619	93.9298	#REF!	157.619	68.7292	124.171	65.98	131.502
	705	99900	229		mesencephalic trigeminal tract	me5	s5	99900	0.04788	417.711	229.74	104.428	355.054	167.084	208.856	187.97	187.97	83.5422	250.627	334.169	271.512	#REF!	41.7711	271.512	229.741	167.084	522.139
	794	100000	229		spinal trigeminal tract	sp5	s5	100000	1.53448	94.4946	87.98	74.944	91.2361	43.663	48.2248	93.8429	56.6967	38.4495	48.8765	95.7979	87.9777	#REF!	103.618	29.9776	112.742	18.2472	88.6294
	798	100100	967		facial nerve	7n	cm	100100	0.39332	106.783	55.93	223.736	177.972	45.7643	71.1889	185.6	55.9341	27.967	193.227	348.317	81.3587	#REF!	50.8492	109.326	66.1039	188.142	193.227
	1131	100200	798		ascending fibers of the facial nerve	asc7	7n	100200	0.0206	0	145.63	339.806	0	0	0	0	0	0	48.5437	145.631	48.5437	#REF!	0	0	0	0	48.5437
	1116	100300	798		genu of the facial nerve	g7	7n	100300	0.06712	0	59.59	208.582	59.5948	74.4934	0	104.291	0	0	14.8987	253.278	104.291	#REF!	0	0	14.8987	29.7974	119.189
	933	100400	967		vestibulocochlear nerve	8n	cm	100400	1.56488	88.8247	173.18	106.078	88.1857	182.123	40.8977	107.356	44.7319	48.566	53.6782	165.508	127.166	#REF!	210.24	148.254	200.654	214.074	258.167
	2461	100410	933		interstitial nucleus of the vestibular part of the 8th nerve	I8	8n	100410	0.01256	0	238.85	0	0	318.471	0	0	0	0	79.6178	238.853	79.6178	#REF!	159.236	159.236	238.853	398.089	557.325
	413	100600	933		vestibular root of the vestibulocochlear nerve	8vn	8n	100600	0.43636	110.001	130.63	59.5838	82.5007	27.5002	57.2921	181.043	45.8337	98.5425	73.3339	203.96	201.668	#REF!	224.585	45.8337	169.585	59.5838	137.501
	948	100700	933		cochlear nerve	8cn	VIIIn	100700	0.67292	92.1358	159.01	172.383	99.5661	243.714	44.5818	109.969	52.0121	43.0958	56.4703	126.315	60.9285	#REF!	173.869	157.522	181.299	312.073	233.311
	2222	100710	967		olivocochlear bundle	ocb	cm	100710	0.01484	0	0	202.156	67.3854	1010.78	0	0	0	0	202.156	336.927	202.156	#REF!	0	202.156	134.771	404.313	67.3854
	841	100800	948		trapezoid body	tz	8cn	100800	0	#DIV/0!	#DIV/0!	#DIV/0!	#DIV/0!	#DIV/0!	#DIV/0!	#DIV/0!	#DIV/0!	#DIV/0!	#DIV/0!	#DIV/0!	#DIV/0!	#REF!	#DIV/0!	#DIV/0!	#DIV/0!	#DIV/0!	#DIV/0!
	506	101000	948		dorsal acoustic stria	das	8cn	101000	0.012	166.667	0	166.667	416.667	0	166.667	333.333	166.667	83.3333	83.3333	83.3333	166.667	#REF!	83.3333	0	166.667	83.3333	333.333
	658	101100	948		lateral lemniscus	ll	8cn	101100	0.47576	52.5475	115.6	161.846	42.038	161.846	14.7133	58.8532	16.8152	14.7133	25.2228	92.4836	50.4456	#REF!	94.5855	134.522	128.216	294.266	138.725
	633	101200	948		commissure of the inferior colliculus	cic	8cn	101200	0	#DIV/0!	#DIV/0!	#DIV/0!	#DIV/0!	#DIV/0!	#DIV/0!	#DIV/0!	#DIV/0!	#DIV/0!	#DIV/0!	#DIV/0!	#DIV/0!	#REF!	#DIV/0!	#DIV/0!	#DIV/0!	#DIV/0!	#DIV/0!
	482	101300	948		brachium of the inferior colliculus	bic	8cn	101300	0.18516	189.026	280.84	199.827	226.831	469.864	113.415	226.831	135.018	113.415	135.018	216.029	81.011	#REF!	383.452	226.831	318.643	372.651	469.864
	808	101400	967		glossopharyngeal nerve	9n	cm	101400	0	#DIV/0!	#DIV/0!	#DIV/0!	#DIV/0!	#DIV/0!	#DIV/0!	#DIV/0!	#DIV/0!	#DIV/0!	#DIV/0!	#DIV/0!	#DIV/0!	#REF!	#DIV/0!	#DIV/0!	#DIV/0!	#DIV/0!	#DIV/0!
	917	101500	967		vagus nerve	10n	cm	101500	0.03312	0	0	120.773	90.5797	0	0	90.5797	150.966	0	60.3865	0	150.966	#REF!	60.3865	0	0	30.1932	332.126
	237	101600	917		solitary tract	sol	10n	101600	0.03312	0	0	120.773	90.5797	0	0	90.5797	150.966	0	60.3865	0	150.966	#REF!	60.3865	0	0	30.1932	332.126
	813	101800	967		hypoglossal nerve	12n	cm	101800	0	#DIV/0!	#DIV/0!	#DIV/0!	#DIV/0!	#DIV/0!	#DIV/0!	#DIV/0!	#DIV/0!	#DIV/0!	#DIV/0!	#DIV/0!	#DIV/0!	#REF!	#DIV/0!	#DIV/0!	#DIV/0!	#DIV/0!	#DIV/0!
	792	102000	967		dorsal roots	drt	cm	102000	1.19908	210.161	271.88	393.635	244.354	519.565	56.7101	118.424	109.25	122.594	178.47	305.234	178.47	#REF!	66.7178	35.0269	71.7217	105.081	173.466
	932	102100	792		cervicothalamic tract	cett	drt	102100	1.19908	210.161	271.88	393.635	244.354	519.565	56.7101	118.424	109.25	122.594	178.47	305.234	178.47	#REF!	66.7178	35.0269	71.7217	105.081	173.466
	514	102600	932		dorsal column	dc	cett	102600	0	#DIV/0!	#DIV/0!	#DIV/0!	#DIV/0!	#DIV/0!	#DIV/0!	#DIV/0!	#DIV/0!	#DIV/0!	#DIV/0!	#DIV/0!	#DIV/0!	#REF!	#DIV/0!	#DIV/0!	#DIV/0!	#DIV/0!	#DIV/0!
	380	102700	514		cuneate fascicle	cf	dc	102700	0	#DIV/0!	#DIV/0!	#DIV/0!	#DIV/0!	#DIV/0!	#DIV/0!	#DIV/0!	#DIV/0!	#DIV/0!	#DIV/0!	#DIV/0!	#DIV/0!	#REF!	#DIV/0!	#DIV/0!	#DIV/0!	#DIV/0!	#DIV/0!
	388	102800	514		gracile fasciculus	gr	dc	102800	0	#DIV/0!	#DIV/0!	#DIV/0!	#DIV/0!	#DIV/0!	#DIV/0!	#DIV/0!	#DIV/0!	#DIV/0!	#DIV/0!	#DIV/0!	#DIV/0!	#REF!	#DIV/0!	#DIV/0!	#DIV/0!	#DIV/0!	#DIV/0!
	697	103000	932		medial lemniscus	ml	cett	103000	1.19908	210.161	271.88	393.635	244.354	519.565	56.7101	118.424	109.25	122.594	178.47	305.234	178.47	#REF!	66.7178	35.0269	71.7217	105.081	173.466
	871	103100	967		spinothalamic tract	sst	cm	103100	0.04604	43.4405	412.68	173.762	108.601	21.7202	0	65.1607	21.7202	130.321	130.321	369.244	238.923	#REF!	108.601	0	21.7202	0	65.1607
	293	103700	871		vestibulospinal tract	vesp	sst	103700	0.04604	43.4405	412.68	173.762	108.601	21.7202	0	65.1607	21.7202	130.321	130.321	369.244	238.923	#REF!	108.601	0	21.7202	0	65.1607
	960	104200	1009		cerebellum related fiber tracts	cbf	fiber_tracts	104200	11.5679	96.3873	88.87	106.934	94.6583	113.331	32.3308	73.3926	54.5474	32.2443	76.5911	147.736	109.873	#REF!	51.0031	33.2817	73.9113	68.8974	201.246
	744	104300	960		cerebellar commissure	cbc	cbf	104300	0.07852	38.2068	203.77	63.678	0	50.9424	0	0	63.678	0	178.298	50.9424	12.7356	#REF!	0	25.4712	25.4712	114.621	114.621
	752	104400	960		cerebellar peduncles	cbp	cbf	104400	6.09828	131.512	140.37	163.325	124.953	173.328	36.5677	94.7808	62.3127	42.471	106.751	220.226	166.112	#REF!	87.2377	56.4093	117.574	108.391	321.238
	326	104500	752		superior cerebellar peduncle	scp	cbp	104500	1.9248	179.759	207.29	169.368	171.966	100.27	76.8911	147.028	120.013	70.1372	179.239	339.256	193.267	#REF!	35.8479	58.7074	114.817	92.9967	388.092
	812	104600	326		decussation of the superior cerebellar peduncle	xscp	scp	104600	1.1782	97.6065	177.39	159.565	133.254	78.0852	64.5052	154.473	112.884	39.8914	151.927	297.063	195.213	#REF!	40.7401	73.8415	129.859	110.338	440.502
	85	104700	812		ventral spinocerebellar tract	vsct	xscp	104700	0.83024	103.585	174.65	148.15	108.402	73.4727	51.7923	140.923	73.4727	26.4984	151.763	251.734	211.987	#REF!	57.8146	103.585	177.057	139.719	579.351
	850	104800	326		uncinate fasciculus of the cerebellum	un	scp	104800	0.06636	135.624	30.14	45.208	0	0	0	15.0693	0	15.0693	45.208	587.703	271.248	#REF!	15.0693	0	90.4159	30.1386	241.109
	866	104900	326		ventral spinocerebellar tract-	vsc	scp	104900	0	#DIV/0!	#DIV/0!	#DIV/0!	#DIV/0!	#DIV/0!	#DIV/0!	#DIV/0!	#DIV/0!	#DIV/0!	#DIV/0!	#DIV/0!	#DIV/0!	#REF!	#DIV/0!	#DIV/0!	#DIV/0!	#DIV/0!	#DIV/0!
	78	105000	752		middle cerebellar peduncle	mcp	cbp	105000	3.05692	140.992	140.99	205.435	124.308	257.776	19.6276	81.4545	39.2552	29.4414	87.9971	208.38	157.021	#REF!	140.01	66.7338	132.486	126.925	289.18
	2167	105010	78		transverse fibers of the pons	tfp	mcp	105010	0.48956	520.876	627.09	712.885	506.577	1107.12	69.4501	147.071	177.711	91.9193	304.355	426.914	281.886	#REF!	463.682	198.137	406.488	422.829	739.439
	1123	105100	752		inferior cerebellar peduncle	icp	cbp	105100	1.11656	22.3902	23.29	37.6155	45.676	68.0662	13.4341	41.198	25.9726	30.4507	33.1375	47.4672	144.193	#REF!	31.3463	24.1814	81.5003	84.1871	293.759
	553	105200	1123		dorsal spinocerebellar tract	dsc	icp	105200	0	#DIV/0!	#DIV/0!	#DIV/0!	#DIV/0!	#DIV/0!	#DIV/0!	#DIV/0!	#DIV/0!	#DIV/0!	#DIV/0!	#DIV/0!	#DIV/0!	#REF!	#DIV/0!	#DIV/0!	#DIV/0!	#DIV/0!	#DIV/0!
	490	105500	1123		bulbocerebellar tract	bct	icp	105500	0	#DIV/0!	#DIV/0!	#DIV/0!	#DIV/0!	#DIV/0!	#DIV/0!	#DIV/0!	#DIV/0!	#DIV/0!	#DIV/0!	#DIV/0!	#DIV/0!	#REF!	#DIV/0!	#DIV/0!	#DIV/0!	#DIV/0!	#DIV/0!
	404	105600	490		olivocerebellar tract	oc	bct	105600	0	#DIV/0!	#DIV/0!	#DIV/0!	#DIV/0!	#DIV/0!	#DIV/0!	#DIV/0!	#DIV/0!	#DIV/0!	#DIV/0!	#DIV/0!	#DIV/0!	#REF!	#DIV/0!	#DIV/0!	#DIV/0!	#DIV/0!	#DIV/0!
	2275	105810	967		cerebellar white matter	cbw	cm	105810	0.67964	10.2996	27.96	33.8414	4.4141	10.2996	0	0	30.8987	0	1.4714	0	88.282	#REF!	0	0	0	0	82.3966
	728	105900	960		middle cerebellar peduncle-	mcep	cbf	105900	5.39112	57.502	28.94	43.7757	61.7682	46.3726	28.009	50.2678	45.6306	21.1459	40.9933	67.1475	47.671	#REF!	10.7584	7.2341	25.2267	23.5573	66.7765
	983	106000	1009		lateral forebrain bundle system	lfbs	fiber_tracts	106000	15.6468	215.316	316.42	334.382	178.951	225.734	152.619	191.03	161.311	174.541	207.072	291.562	228.865	#REF!	104.111	119.45	193.97	157.988	266.956
	776	106100	983		corpus callosum	cc	lfbs	106100	10.0499	286.372	431.25	400.204	237.615	186.171	223.485	270.252	214.629	248.56	284.282	377.218	312.939	#REF!	65.4734	109.454	176.818	131.345	255.525
	956	106200	776		forceps minor of the corpus callosum	fmi	cc	106200	7.02884	172.575	317.26	324.52	154.649	237.308	67.0096	103.147	86.643	98.7361	108.126	215.541	178.55	#REF!	82.2326	142.698	217.248	164.75	297.062
	579	106300	956		external capsule	ec	fmi	106300	5.43884	150.584	298.23	314.773	151.503	252.811	55.3427	99.2859	89.725	89.725	97.4472	237.551	178.163	#REF!	103.331	159.225	252.444	201.33	352.281
	1108	106500	776		genu of the corpus callosum	gcc	cc	106500	0.62192	527.399	840.94	665.681	466.298	27.3347	487.201	517.751	430.924	472.73	514.536	591.716	546.694	#REF!	77.1803	40.1981	82.0041	27.3347	94.8675
	971	106600	776		forceps major of the corpus callosum	fmj	cc	106600	0.16104	428.465	341.53	465.723	465.723	136.612	496.771	652.012	360.159	478.142	720.318	850.72	763.785	#REF!	0	12.4193	12.4193	18.6289	86.9349
	986	106800	776		splenium of the corpus callosum	scc	cc	106800	0.06464	324.876	324.88	340.346	324.876	139.233	525.99	510.52	417.698	510.52	758.045	649.753	433.168	#REF!	0	0	0	46.4109	77.3515
	784	106900	983		corticospinal tract	cst	lfbs	106900	5.39128	90.8875	112.03	222.211	74.1939	305.493	26.1533	49.7099	67.7019	43.2179	70.8552	140.783	80.5004	#REF!	179.92	142.452	230.372	211.638	291.026
	6	107000	784		internal capsule	ic	cst	107000	2.56328	44.8644	83.49	135.373	47.9854	147.467	14.4346	27.6989	44.8644	24.1878	30.0396	74.904	49.1558	#REF!	36.2816	63.2003	144.736	107.674	155.66
	924	107100	784		cerebral peduncle	cp	cst	107100	2.11824	160.511	157.68	270.036	98.6668	555.65	25.965	76.0065	83.5599	75.0623	121.327	229.436	122.271	#REF!	367.758	252.568	402.221	377.672	482.004
	190	107600	784		pyramidal tract	py	cst	107600	0.4406	6.8089	4.54	363.141	43.123	86.246	86.246	27.2356	145.256	9.0785	61.2801	79.4371	31.7749	#REF!	188.38	127.099	11.3482	106.673	170.222
	198	107700	784		pyramidal decussation	pyx	cst	107700	0.09428	0	0	0	0	0	0	0	0	0	0	0	0	#REF!	0	0	0	0	84.8536
	2169	107910	784		longitudinal fasciculus of the pons	lfp	cst	107910	0.17488	182.983	308.78	680.467	280.192	308.783	62.9003	137.237	51.4639	45.7457	120.082	263.038	200.137	#REF!	85.7731	85.7731	80.0549	102.928	377.402
	896	108000	983		thalamus related	lfbst	lfbs	108000	0.2056	4.86381	63.23	58.3658	58.3658	68.0934	4.8638	24.3191	9.7276	0	4.8638	58.3658	9.7276	#REF!	4.8638	4.8638	77.821	53.5019	194.553
	1092	108100	896		External medullary lamina	eml	lfbst	108100	0.1478	6.7659	33.83	27.0636	47.3613	67.659	0	20.2977	0	0	0	33.8295	6.7659	#REF!	6.7659	6.7659	27.0636	54.1272	169.148
	14	108200	896		internal medullary lamina	iml	lfbst	108200	0	#DIV/0!	#DIV/0!	#DIV/0!	#DIV/0!	#DIV/0!	#DIV/0!	#DIV/0!	#DIV/0!	#DIV/0!	#DIV/0!	#DIV/0!	#DIV/0!	#REF!	#DIV/0!	#DIV/0!	#DIV/0!	#DIV/0!	#DIV/0!
	2109	108210	896		superior thalamic radiation	str	lfbst	108210	0.0578	0	138.41	138.408	86.5052	69.2042	17.301	34.6021	34.6021	0	17.301	121.107	17.301	#REF!	0	0	207.613	51.9031	259.516
	1000	108500	1009		extrapyramidal fiber systems	eps	fiber_tracts	108500	0.72828	234.8	265.01	226.561	240.292	520.404	98.8631	188.114	130.444	130.444	225.188	227.934	157.906	#REF!	61.7894	85.1321	163.399	151.041	260.889
	760	108600	1000		cerebral nuclei related	epsc	eps	108600	0.16168	476.249	463.88	309.253	315.438	1490.6	290.698	463.879	333.993	346.363	612.321	599.951	321.623	#REF!	197.922	272.142	538.1	420.584	667.986
	102	108800	760		nigrostriatal bundle	ns	epsc	108800	0.16168	476.249	463.88	309.253	315.438	1490.6	290.698	463.879	333.993	346.363	612.321	599.951	321.623	#REF!	197.922	272.142	538.1	420.584	667.986
	877	109300	1000		tectospinal tract	ts	eps	109300	0.27856	122.056	154.37	183.084	233.343	215.393	50.2585	114.876	43.0787	89.7473	86.1574	140.006	75.3877	#REF!	3.5899	7.1798	39.4888	46.6686	136.416
	1060	109500	877		dorsal tegmental decussation	dtgx	ts	109500	0.04104	341.131	243.66	97.4659	194.932	73.0994	121.832	268.031	170.565	462.963	194.932	97.4659	243.665	#REF!	24.3665	0	0	24.3665	73.0994
	863	109700	1000		rubrospinal tract	rs	eps	109700	0.23152	246.199	289.39	246.199	228.922	336.904	43.1928	116.621	107.982	51.8314	129.578	103.663	129.578	#REF!	43.1928	69.1085	86.3856	125.259	181.41
	397	109800	863		ventral tegmental decussation	vtgx	rs	109800	0.03208	872.818	592.27	841.646	841.646	1402.74	187.032	498.753	716.958	249.377	529.925	405.237	436.409	#REF!	187.032	0	280.549	187.032	467.581
	941	110400	1000		vestibulomesencephalic tract	veme	eps	110400	0.05652	53.0786	141.54	123.85	106.157	0	17.6929	53.0786	70.7714	35.3857	194.621	106.157	212.314	#REF!	35.3857	0	17.6929	0	35.3857
	991	110500	1009		medial forebrain bundle system	mfbs	fiber_tracts	110500	8.2814	311.421	447.87	354.892	291.738	292.221	287.029	317.338	273.263	285.459	387.495	448.958	347.526	#REF!	77.4024	118.338	238.607	185.597	265.173
	768	110600	991		cerebrum related	mfbc	mfbs	110600	7.46432	272.094	412.09	328.362	255.616	243.425	270.755	295.137	243.693	254.946	355.424	393.472	305.989	#REF!	40.995	88.0187	188.497	156.88	229.224
	908	110900	768		anterior commissure posterior limb	acp	mfbc	110900	0.31016	480.397	596.47	586.794	390.121	67.707	399.794	422.363	454.604	406.242	412.69	554.553	531.984	#REF!	64.4828	167.655	190.224	93.5001	190.224
	940	111000	768		cingulum	cg	mfbc	111000	1.59024	311.274	435.78	343.973	266.626	406.857	505.584	465.339	340.829	359.065	508.728	494.265	398.053	#REF!	13.8344	30.813	52.8222	54.7087	116.335
	1099	111100	768		fornix system	fxs	mfbc	111100	4.88152	271.432	435.72	329.406	269.793	219.399	221.038	263.647	219.194	238.86	341.082	389.223	291.303	#REF!	50.8038	99.1494	227.798	190.924	269.998
	466	111200	1099		alveus of the hippocampus	alv	fxs	111200	1.9146	295.101	426.72	338.974	303.98	173.927	179.672	265.33	130.576	149.379	343.675	376.058	240.259	#REF!	43.8734	59.0202	139.455	102.894	224.59
	530	111300	1099		dorsal fornix	df	fxs	111300	0.18256	635.408	717.57	618.975	580.631	76.6871	657.318	624.452	629.93	744.961	635.408	668.273	657.318	#REF!	27.3883	49.2989	136.941	82.1648	65.7318
	603	111400	1099		fimbria of the hippocampus	fi	fxs	111400	1.35084	136.952	256.88	207.278	142.874	134.731	152.498	182.849	204.317	151.757	231.708	246.513	207.278	#REF!	31.832	99.1975	330.165	283.527	346.451
	737	111700	1099		postcommissural fornix	fxpo	fxs	111700	0.35652	715.247	1127.57	805.004	586.222	628.296	538.539	566.588	675.979	886.346	788.175	1049.03	855.492	#REF!	117.805	168.293	356.221	280.489	328.172
	436	111900	737		fornix	f	fxpo	111900	0.35652	715.247	1127.57	805.004	586.222	628.296	538.539	566.588	675.979	886.346	788.175	1049.03	855.492	#REF!	117.805	168.293	356.221	280.489	328.172
	618	112000	1099		hippocampal commissures	hc	fxs	112000	1.077	189.415	399.26	259.053	210.771	295.265	201.486	200.557	174.559	207.057	275.766	325.905	238.626	#REF!	68.7094	155.989	229.341	220.056	270.195
	443	112100	618		dorsal hippocampal commissure	dhc	hc	112100	0.86292	173.828	349.97	213.23	187.735	238.724	144.857	166.875	117.044	119.362	201.641	280.443	163.399	#REF!	49.8308	90.3908	123.998	99.6616	257.266
	449	112200	618		ventral hippocampal commissure	vhc	hc	112200	0.21408	252.242	597.91	443.759	303.625	523.169	429.746	336.323	406.39	560.538	574.552	509.156	541.854	#REF!	144.806	420.404	653.961	705.344	322.309
	37	112500	768		longitudinal association bundle	lab	mfbc	112500	0	#DIV/0!	#DIV/0!	#DIV/0!	#DIV/0!	#DIV/0!	#DIV/0!	#DIV/0!	#DIV/0!	#DIV/0!	#DIV/0!	#DIV/0!	#DIV/0!	#REF!	#DIV/0!	#DIV/0!	#DIV/0!	#DIV/0!	#DIV/0!
	301	112600	768		stria terminalis	st	mfbc	112600	0.6824	90.8558	104.04	167.057	67.4091	114.302	20.5158	65.9437	96.7175	58.6166	74.7362	115.768	93.7866	#REF!	23.4467	105.51	222.743	180.246	218.347
	2394	112610	301		commissural stria terminalis	cmst	st	112610	0.00308	1298.7	324.68	0	649.351	0	0	324.675	0	0	0	649.351	0	#REF!	0	0	0	649.351	0
	824	112700	991		hypothalamus related	mfsbshy	mfbs	112700	0.81708	670.681	774.71	597.249	621.726	737.994	435.698	520.145	543.398	564.204	680.472	955.843	726.979	#REF!	409.997	395.31	696.382	447.937	593.577
	54	112800	824		medial forebrain bundle	mfb	mfsbshy	112800	0	#DIV/0!	#DIV/0!	#DIV/0!	#DIV/0!	#DIV/0!	#DIV/0!	#DIV/0!	#DIV/0!	#DIV/0!	#DIV/0!	#DIV/0!	#DIV/0!	#REF!	#DIV/0!	#DIV/0!	#DIV/0!	#DIV/0!	#DIV/0!
	341	113600	824		retromammillary decussation	rmx	mfsbshy	113600	0.02068	531.915	773.69	435.203	531.915	2562.86	338.491	483.559	580.271	241.78	1112.19	338.491	435.203	#REF!	2321.08	918.762	1547.39	1063.83	1208.9
	46	114300	824		mammillary related	mfbsma	mfsbshy	114300	0.206	1271.84	1165.05	927.184	1033.98	961.165	563.107	757.282	694.175	1092.23	849.515	1776.7	1160.19	#REF!	223.301	242.718	427.185	179.612	514.563
	753	114400	46		principal mammillary tract	pm	mfbsma	114400	0.007	857.143	1142.86	571.429	571.429	1285.71	285.714	285.714	857.143	857.143	142.857	285.714	142.857	#REF!	0	0	142.857	0	428.571
	690	114500	46		mammilothalmic tract	mt	mfbsma	114500	0.18196	1340.95	1236.54	945.263	1055.18	796.878	593.537	796.878	719.938	1148.6	884.81	1901.52	1258.52	#REF!	142.888	247.307	384.7	137.393	505.606
	681	114600	46		mammillotegmental tract	mtg	mfbsma	114600	0.01512	793.651	396.83	992.063	925.926	2645.5	396.825	595.238	396.825	661.376	859.788	1190.48	595.238	#REF!	1190.48	330.688	793.651	727.513	727.513
	673	114700	46		mammillary peduncle	mp	mfbsma	114700	0.00192	0	520.83	0	1562.5	2083.33	0	0	0	0	0	0	0	#REF!	1041.67	0	2604.17	520.833	0
	1083	115000	824		epithalamus related	mfbse	mfsbshy	115000	0.5904	465.786	638.55	487.805	481.03	596.206	394.648	438.686	489.499	391.26	606.369	691.057	586.043	#REF!	408.198	430.217	760.501	519.986	599.593
	802	115100	1083		stria medullaris	sm	mfbse	115100	0.33488	501.672	830.15	573.34	465.839	444.935	474.797	492.714	594.243	474.797	719.661	827.162	659.938	#REF!	232.919	343.407	758.481	540.492	450.908
	595	115200	1083		fasciculus retroflexus	fr	mfbse	115200	0.20404	411.684	406.78	274.456	338.169	838.071	259.753	264.654	294.06	308.763	357.773	499.902	450.892	#REF!	593.021	514.605	749.853	441.09	833.17
	611	115300	1083		habenular commissure	hbc	mfbse	115300	0.05148	446.775	310.8	777.001	1146.08	621.601	407.925	777.001	582.751	174.825	854.701	563.326	641.026	#REF!	815.851	660.451	815.851	699.301	641.026
	73	115800	997		ventricular systems	VS	root	115800	6.8714	234.887	303.87	308.525	225.136	363.099	191.81	237.506	257.444	196.321	301.831	287.569	256.134	#REF!	196.903	304.741	493.058	409.524	623.454
	81	115900	73		lateral ventricle	LV	VS	115900	3.73932	248.441	310.22	325.193	190.944	228.384	180.781	232.395	279.463	210.733	311.019	260.743	225.175	#REF!	80.4959	290.427	529.241	385.899	660.28
	98	116100	81		ependymal and subendymal layer/olfacotry ventricle	E/OV	LV	116100	0.0834	47.9616	179.86	95.9233	71.9424	71.9424	59.952	0	47.9616	95.9233	23.9808	71.9424	23.9808	#REF!	0	143.885	95.9233	23.9808	83.9329
	108	116200	81		choroid plexus	chp	LV	116200	0	#DIV/0!	#DIV/0!	#DIV/0!	#DIV/0!	#DIV/0!	#DIV/0!	#DIV/0!	#DIV/0!	#DIV/0!	#DIV/0!	#DIV/0!	#DIV/0!	#REF!	#DIV/0!	#DIV/0!	#DIV/0!	#DIV/0!	#DIV/0!
	124	116400	73		interventricular foramen	IVF	VS	116400	0	#DIV/0!	#DIV/0!	#DIV/0!	#DIV/0!	#DIV/0!	#DIV/0!	#DIV/0!	#DIV/0!	#DIV/0!	#DIV/0!	#DIV/0!	#DIV/0!	#REF!	#DIV/0!	#DIV/0!	#DIV/0!	#DIV/0!	#DIV/0!
	129	116500	73		3rd Ventricle	3V	VS	116500	1.09172	486.388	728.21	599.971	547.76	670.502	460.741	455.245	501.96	427.765	635.694	710.805	685.157	#REF!	634.778	529.44	814.311	779.504	962.701
	2373	116510	129		dorsal third ventricle	D3V	3V	116510	0.9172	368.513	525.51	508.068	379.416	587.658	413.214	408.853	392.499	297.645	506.978	529.874	508.068	#REF!	566.943	454.645	731.574	585.477	938.727
	140	116600	73		aqueduct	Aq	VS	116600	0.27188	224.364	235.4	95.6304	261.145	595.851	334.707	202.295	279.535	194.939	319.994	408.268	242.754	#REF!	136.089	220.686	242.754	378.844	378.844
	145	116700	73		4th Ventricle	4V	VS	116700	1.76636	52.6506	39.06	126.248	92.8463	422.904	27.1745	119.455	56.6136	23.2116	73.5977	64.5395	58.8781	#REF!	182.296	209.47	257.026	236.079	373.65
	2219	116710	145		superior medullary velum	SMV	4V	116710	0.04844	82.5764	0	330.305	206.441	578.035	0	392.238	82.5764	20.6441	61.9323	103.221	20.6441	#REF!	557.391	144.509	330.305	289.017	247.729
	153	116800	145		lateral recess of the 4th ventricle	LR4V	4V	116800	0.74624	42.8816	22.78	37.5214	33.5013	396.655	17.4207	75.0429	17.4207	24.1209	65.6625	13.4005	85.7633	#REF!	92.4636	223.789	253.27	230.489	321.612
	164	116900	73		central canal	CC	VS	116900	0.00212	0	0	0	0	0	0	0	0	0	0	0	0	#REF!	0	0	0	0	471.698
	1024	117000	997		grooves	grv	root	117000	0.014	428.571	500	642.857	285.714	571.429	214.286	357.143	428.571	285.714	357.143	428.571	71.4286	#REF!	642.857	428.571	428.571	1071.43	857.143
	1032	117100	1024		grooves of the cerebral cortex	grv_of_CTX	grv	117100	0	#DIV/0!	#DIV/0!	#DIV/0!	#DIV/0!	#DIV/0!	#DIV/0!	#DIV/0!	#DIV/0!	#DIV/0!	#DIV/0!	#DIV/0!	#DIV/0!	#REF!	#DIV/0!	#DIV/0!	#DIV/0!	#DIV/0!	#DIV/0!
	1063	117300	1032		hippocampal fissure	hif	grv_of_CTX	117300	0	#DIV/0!	#DIV/0!	#DIV/0!	#DIV/0!	#DIV/0!	#DIV/0!	#DIV/0!	#DIV/0!	#DIV/0!	#DIV/0!	#DIV/0!	#DIV/0!	#REF!	#DIV/0!	#DIV/0!	#DIV/0!	#DIV/0!	#DIV/0!
	1071	117400	1032		rhinal fissure	rf	grv_of_CTX	117400	0	#DIV/0!	#DIV/0!	#DIV/0!	#DIV/0!	#DIV/0!	#DIV/0!	#DIV/0!	#DIV/0!	#DIV/0!	#DIV/0!	#DIV/0!	#DIV/0!	#REF!	#DIV/0!	#DIV/0!	#DIV/0!	#DIV/0!	#DIV/0!
	1040	117600	1024		grooves of the cerebellar cortex	grv_of_CBX	grv	117600	0	#DIV/0!	#DIV/0!	#DIV/0!	#DIV/0!	#DIV/0!	#DIV/0!	#DIV/0!	#DIV/0!	#DIV/0!	#DIV/0!	#DIV/0!	#DIV/0!	#REF!	#DIV/0!	#DIV/0!	#DIV/0!	#DIV/0!	#DIV/0!
	1087	117700	1040		precentral fissure	pcn	grv_of_CBX	117700	0	#DIV/0!	#DIV/0!	#DIV/0!	#DIV/0!	#DIV/0!	#DIV/0!	#DIV/0!	#DIV/0!	#DIV/0!	#DIV/0!	#DIV/0!	#DIV/0!	#REF!	#DIV/0!	#DIV/0!	#DIV/0!	#DIV/0!	#DIV/0!
	1095	117800	1040		preculminate	pcuf	grv_of_CBX	117800	0	#DIV/0!	#DIV/0!	#DIV/0!	#DIV/0!	#DIV/0!	#DIV/0!	#DIV/0!	#DIV/0!	#DIV/0!	#DIV/0!	#DIV/0!	#DIV/0!	#REF!	#DIV/0!	#DIV/0!	#DIV/0!	#DIV/0!	#DIV/0!
	1103	117900	1040		primary fissure	prf	grv_of_CBX	117900	0	#DIV/0!	#DIV/0!	#DIV/0!	#DIV/0!	#DIV/0!	#DIV/0!	#DIV/0!	#DIV/0!	#DIV/0!	#DIV/0!	#DIV/0!	#DIV/0!	#REF!	#DIV/0!	#DIV/0!	#DIV/0!	#DIV/0!	#DIV/0!
	1112	118000	1040		post superior fissure	psf	grv_of_CBX	118000	0	#DIV/0!	#DIV/0!	#DIV/0!	#DIV/0!	#DIV/0!	#DIV/0!	#DIV/0!	#DIV/0!	#DIV/0!	#DIV/0!	#DIV/0!	#DIV/0!	#REF!	#DIV/0!	#DIV/0!	#DIV/0!	#DIV/0!	#DIV/0!
	1119	118100	1040		prepyramidal fissure	ppf	grv_of_CBX	118100	0	#DIV/0!	#DIV/0!	#DIV/0!	#DIV/0!	#DIV/0!	#DIV/0!	#DIV/0!	#DIV/0!	#DIV/0!	#DIV/0!	#DIV/0!	#DIV/0!	#REF!	#DIV/0!	#DIV/0!	#DIV/0!	#DIV/0!	#DIV/0!
	3	118200	1040		secondary fissure	sf	grv_of_CBX	118200	0	#DIV/0!	#DIV/0!	#DIV/0!	#DIV/0!	#DIV/0!	#DIV/0!	#DIV/0!	#DIV/0!	#DIV/0!	#DIV/0!	#DIV/0!	#DIV/0!	#REF!	#DIV/0!	#DIV/0!	#DIV/0!	#DIV/0!	#DIV/0!
	11	118300	1040		posterolateral fissure	plf	grv_of_CBX	118300	0	#DIV/0!	#DIV/0!	#DIV/0!	#DIV/0!	#DIV/0!	#DIV/0!	#DIV/0!	#DIV/0!	#DIV/0!	#DIV/0!	#DIV/0!	#DIV/0!	#REF!	#DIV/0!	#DIV/0!	#DIV/0!	#DIV/0!	#DIV/0!
	34	118600	1040		intercrural fissure	icf	grv_of_CBX	118600	0	#DIV/0!	#DIV/0!	#DIV/0!	#DIV/0!	#DIV/0!	#DIV/0!	#DIV/0!	#DIV/0!	#DIV/0!	#DIV/0!	#DIV/0!	#DIV/0!	#REF!	#DIV/0!	#DIV/0!	#DIV/0!	#DIV/0!	#DIV/0!
	43	118700	1040		ansoparamedian fissure	apmf	grv_of_CBX	118700	0	#DIV/0!	#DIV/0!	#DIV/0!	#DIV/0!	#DIV/0!	#DIV/0!	#DIV/0!	#DIV/0!	#DIV/0!	#DIV/0!	#DIV/0!	#DIV/0!	#REF!	#DIV/0!	#DIV/0!	#DIV/0!	#DIV/0!	#DIV/0!
	65	119000	1040		parafloccular sulcus	pfs	grv_of_CBX	119000	0	#DIV/0!	#DIV/0!	#DIV/0!	#DIV/0!	#DIV/0!	#DIV/0!	#DIV/0!	#DIV/0!	#DIV/0!	#DIV/0!	#DIV/0!	#DIV/0!	#REF!	#DIV/0!	#DIV/0!	#DIV/0!	#DIV/0!	#DIV/0!
	624	119100	1024		Interpeduncular fossa	IPF	grv	119100	0.014	428.571	500	642.857	285.714	571.429	214.286	357.143	428.571	285.714	357.143	428.571	71.4286	#REF!	642.857	428.571	428.571	1071.43	857.143

## Sheet: PILOT_300min group_DENSITY
Notes	id	structure_order	parent_id	Natural order	Name	acronym	parent_acronym	Structure_order	ROI_Volume_mm_3	Control_M1	Control_M2	Control_M3	Control_M4	Control_M5	Deep_M1	Deep_M2	Deep_M3	Deep_M4	Deep_m5
	997	0		root	root	root		0	489.077	578.172	871.14	1023.29	737.783	301.294	1043.43	448.669	623.231	657.399	704.359
	8	100	997	root	Basic cell groups and regions	grey	root	100	432.145	605.292	924.329	1077.24	771.78	311.178	1086.67	455.775	644.705	676.583	728.189
	567	200	8	A	Cerebrum	CH	grey	200	266.221	747.547	1199.52	1336.48	903.18	295.829	1189.54	464.666	745.714	751.517	803.722
	688	300	567	1	Cerebral cortex	CTX	CH	300	211.767	847.741	1372.96	1567.34	1062.98	342.853	1308.75	470.809	787.708	795.59	861.431
	695	400	688	2	Cortical plate	CTXpl	CTX	400	202.308	854.589	1388.86	1600.31	1083.81	346.437	1316.32	465.271	779.49	791.18	845.939
	315	500	695	3	Isocortex	Isocortex	CTXpl	500	123.077	1127.6	1856.28	2300.16	1499.43	430.518	1474.23	421.004	930.505	848.776	929.928
	184	600	315	4	Frontal association cortex	FrA	Isocortex	600	2.42804	23.8876	274.707	203.044	36.2432	2.47113	28.8298	157.329	190.689	311.362	161.447
	68	700	184	6	Frontal pole layer 1	FrA-1	FrA	700	0.70132	49.9059	434.894	461.986	94.1083	1.42588	51.3318	243.826	299.435	507.614	432.042
	667	800	184	6	Frontal pole layer 2/3	FrA-2/3	FrA	800	1.1622	12.0461	179.831	69.6954	10.3252	2.58131	17.2087	97.2294	92.9272	180.692	29.2549
	2325	810	184	6	Frontal pole layer 5	FrA-5	FrA	810	0.43176	20.8449	303.409	145.914	18.5288	4.6322	30.1093	169.075	243.191	354.364	50.9542
	500	900	315	4	motor cortex	M	Isocortex	900	18.5046	1002.51	1677.63	1669.31	1062.65	113.269	1442.39	388.227	802.231	852.975	775.049
	985	1500	500	4	Primary motor cortex	M1	M	1500	8.92728	1050.15	1836.73	1997.02	1286.39	128.483	1488.7	378.951	894.337	858.492	898.146
	320	1510	985	6	Primary motor cortex layer 1	M1-1	M1	1510	1.14472	723.321	1522.64	864.84	838.633	228.877	1540.11	687.504	1278.04	920.749	745.16
	943	1520	985	6	Primary motor cortex layer 2/3	M1-2/3	M1	1520	3.07564	1567.48	2770.16	2791.94	1806.45	167.77	2485.01	470.471	1186.74	1121.39	964.352
	648	1530	985	6	Primary motor cortex layer 5	M1-5	M1	1530	2.06064	1280.67	1917.37	2705.47	1578.15	129.571	1265.14	294.083	843.427	918.647	1140.42
	844	1540	985	6	Primary motor cortex layer 6a	M1-6a	M1	1540	1.61544	497.078	899.445	1333.38	830.733	49.5221	625.836	227.802	424.652	491.507	809.067
	882	1540	985	6	Primary motor cortex layer 6b	M1-6b	M1	1540	0.40572	285.911	229.222	505.275	460.909	36.9713	547.175	298.235	268.658	522.528	611.259
	2017	2010	985	5	Frontal cortex area 3	FrC3	M1	2010	0.62512	268.748	1019	507.103	299.143	11.1979	70.3865	86.3834	540.696	419.12	470.31
	2334	2020	2017	6	Frontal cortex area 3 layer1	FrC3-1	FrC3	2020	0.10408	374.712	739.816	355.496	345.888	38.432	134.512	163.336	701.384	509.224	739.816
	2335	2020	2017	6	Frontal cortex area 3 layer2/3	FrC3-2/3	FrC3	2020	0.26076	371.99	1441.94	747.814	444.854	7.66989	49.8543	23.0097	640.436	452.523	394.999
	2336	2040	2017	6	Frontal cortex area 3 layer5	FrC3-5	FrC3	2040	0.19376	139.348	846.408	407.721	154.831	5.16102	51.6102	129.026	433.526	418.043	485.136
	2337	2050	2017	6	Frontal cortex area 3 layer6a	FrC3-6a	FrC3	2050	0.06216	80.4376	305.663	96.5251	64.3501	0	96.5251	96.5251	160.875	160.875	257.4
	2351	2060	2017	6	Frontal cortex area 3 layer6b	FrC3-6b	FrC3	2060	0.00436	0	229.358	0	229.358	0	229.358	0	917.431	0	917.431
	993	2100	500	4	Secondary motor cortex	M2	M	2100	9.57736	958.093	1529.34	1363.84	854.098	99.0878	1399.24	396.873	716.377	847.833	660.307
	656	2200	993	6	Secondary motor cortex layer 1	M2-1	M2	2200	1.77644	508.32	978.361	597.262	608.52	109.77	1071.24	409.808	726.171	716.039	368.715
	962	2300	993	6	Secondary motor cortex layer 2/3	M2-2/3	M2	2300	3.47444	1081.33	1684.88	1152.13	726.448	83.1789	1804.03	444.1	728.751	782.284	473.745
	767	2400	993	6	Secondary motor cortex layer 5	M2-5	M2	2400	2.78784	1221.02	1806.42	2045.67	1202.01	125.187	1438.03	398.158	832.544	1137.44	943.024
	1021	2500	993	6	Secondary motor cortex layer 6a	M2-6a	M2	2500	1.44352	719.768	1364.03	1528.21	806.362	75.5099	784.194	275.022	473.842	626.94	908.197
	1085	2600	993	6	Secondary motor cortex layer 6b	M2-6b	M2	2600	0.09512	767.452	525.652	935.66	630.782	73.5913	935.66	241.8	357.443	567.704	872.582
	453	2700	315	4	Somatosensory cortex	S	Isocortex	2700	40.0892	1395.79	2425.49	2978.03	1938.75	454.886	1611.96	390.055	1100.02	974.652	1027.86
	322	2800	453	4	Primary somatosensory cortex	S1	S	2800	33.1307	1488.32	2497.11	3128.22	1992.56	454.594	1813.09	400.354	1116.22	987.695	1056.51
	793	2900	322	6	Primary somatosensory area undefined layer 1	S1-1	S1	2900	1.40584	1312.38	2075.63	3337.51	2052.15	450.265	1803.9	538.468	1123.88	1000.11	1158.74
	346	3000	793	6	Primary somatosensory area undefined layer 2/3	S1-2/3	S1-1	3000	0.29916	2109.24	2841.29	3509.83	2346.57	835.673	2573.87	722.022	1276.91	849.044	925.926
	865	3100	793	6	Primary somatosensory area undefined layer 4	S1-4	S1-1	3100	0.307	2065.15	3231.27	5065.15	3302.93	384.365	2648.21	537.459	1651.47	1299.67	1684.04
	921	3200	793	6	Primary somatosensory area undefined layer 5	S1-5	S1-1	3200	0.29428	876.716	2198.59	4441.35	1957.32	251.461	876.716	339.812	941.28	1002.45	1148.57
	686	3300	793	6	Primary somatosensory area undefined layer 6a	S1-6a	S1-1	3300	0.2362	499.577	906.012	2265.03	1291.28	93.1414	1342.08	465.707	423.37	715.495	715.495
	719	3400	793	6	Primary somatosensory area undefined layer 6b	S1-6b	S1-1	3400	0.07808	140.881	268.955	768.443	691.598	64.0369	1331.97	422.643	614.754	461.066	499.488
	2338	3410	322	5	Primary somatosensory area jaw	S1J	S1	3410	3.6422	643.293	1770.63	1143.81	957.388	47.7733	318.763	148.262	786.063	637.527	576.849
missing lvl 5	2339	3420	2338	6	Primary somatosensory area jaw layer 1	S1J-1	S1J	3420	0.5176	703.246	1197.84	680.062	786.321	67.6198	537.094	386.399	985.317	788.253	780.526
	2340	3430	2338	6	Primary somatosensory area jaw layer 2/3	S1J-2/3	S1J	3430	0.798	1770.68	3855.89	2576.44	2578.95	127.82	684.211	116.541	1298.25	784.461	571.429
	2341	3440	2338	6	Primary somatosensory area jaw layer 4	S1J-4	S1J	3440	0.64336	530.03	1958.47	1344.5	884.419	35.7498	73.054	136.782	1120.68	1013.43	935.713
	2342	3450	2338	6	Primary somatosensory area jaw layer 5	S1J-5	S1J	3450	0.96228	193.291	1305.23	853.182	396.974	12.4704	141.331	99.7631	472.835	438.542	459.326
	2343	3460	2338	6	Primary somatosensory area jaw layer 6a	S1J-6a	S1J	3460	0.6094	50.8697	365.934	108.303	105.021	1.64096	213.325	86.9708	211.684	292.091	282.245
	2344	3470	2338	6	Primary somatosensory area jaw layer 6b	S1J-6b	S1J	3470	0.11156	71.7103	116.529	53.7827	62.7465	8.96379	215.131	89.6379	107.565	322.696	224.095
	329	4200	322	5	Primary somatosensory cortex barrel field	S1BF	S1	4200	10.5996	1521.84	2713.11	3768.52	2087.05	721.062	2096.2	484.45	1277.02	1147.59	1203.72
	981	4300	329	6	Primary somatosensory cortex barrel field layer 1	S1BF-1	S1BF	4300	1.25976	1454.25	1401.06	1142.28	978.758	1001.78	2063.89	1218.49	1883.69	1352.64	1973.39
	201	4400	329	6	Primary somatosensory cortex barrel field layer 2/3	S1BF-2/3	S1BF	4400	2.21576	2846.43	4848.9	4928.78	2806.71	1459.54	4582.17	497.798	1961.4	1383.72	962.198
	1047	4500	329	6	Primary somatosensory cortex barrel field layer 4	S1BF-4	S1BF	4500	2.45004	2344.45	4319.11	6066.02	3792.18	1099.57	2502.82	468.972	1818.75	1707.32	1957.52
	1070	4600	329	6	Primary somatosensory cortex barrel field layer 5	S1BF-5	S1BF	4600	2.0738	817.822	2218.63	4682.71	1818.4	164.432	690.038	307.648	697.271	884.849	1037.23
	1038	4700	329	6	Primary somatosensory cortex barrel field layer 6a	S1BF-6a	S1BF	4700	1.90816	248.931	504.151	1395.06	728.975	46.1177	788.718	314.963	357.936	604.771	551.841
	1062	4800	329	6	Primary somatosensory cortex barrel field layer 6b	S1BF-6b	S1BF	4800	0.69212	111.252	150.263	505.693	313.529	34.6761	575.045	157.487	335.202	320.754	203.722
	337	4900	322	5	Primary somatosensory cortex hindlimb region	S1HL	S1	4900	3.57308	2004.43	2808.22	3994.59	2622.95	343.401	2652.61	447.513	1197.85	1100.45	1349.54
	1030	5000	337	6	Primary somatosensory cortex hindlimb region layer 1	S1HL-1	S1HL	5000	0.39432	768.411	1744.78	1039.76	1080.34	702.475	2533.48	1034.69	2153.07	1232.5	829.276
	113	5100	337	6	Primary somatosensory cortex hindlimb region layer 2/3	S1HL-2/3	S1HL	5100	0.83304	3187.12	4319.12	4555.6	3137.9	644.627	4461.97	553.395	1681.79	1259.24	1184.82
	1094	5200	337	6	Primary somatosensory cortex hindlimb region layer 4	S1HL-4	S1HL	5200	0.593	3141.65	4637.44	6947.72	4667.79	315.346	4357.5	512.648	1629.01	1755.48	2505.9
	1128	5300	337	6	Primary somatosensory cortex hindlimb region layer 5	S1HL-5	S1HL	5300	0.7508	2456.05	3107.35	5677.94	3301.81	255.727	2004.53	265.051	1008.26	1194.73	1694.19
	478	5400	337	6	Primary somatosensory cortex hindlimb region layer 6a	S1HL-6a	S1HL	5400	0.76408	603.34	765.627	2069.16	1210.61	34.0279	760.392	210.711	342.896	417.496	776.097
	510	5500	337	6	Primary somatosensory cortex hindlimb region layer 6b	S1HL-6b	S1HL	5500	0.23784	151.362	336.361	437.269	672.721	33.6361	386.815	277.497	189.203	588.631	660.108
	345	5600	322	5	Primary somatosensory cortex upper lip region	S1ULp	S1	5600	6.29848	1196.32	2454.56	2592.53	1955.87	374.059	1206.48	311.98	975.632	879.736	843.219
	878	5700	345	6	Primary somatosensory cortex upper lip region layer 1	S1ULp-1	S1ULp	5700	0.82148	1128.45	1287.92	1180.8	975.069	348.152	1645.81	805.863	1247.75	994.546	1398.7
	657	5800	345	6	Primary somatosensory cortex upper lip region layer 2/3	S1ULp-2/3	S1ULp	5800	1.40128	2742.49	5169.56	4423.81	3900.01	1043.33	3358.36	361.812	1478.65	1102.56	852.078
	950	5900	345	6	Primary somatosensory cortex upper lip region layer 4	S1ULp-4	S1ULp	5900	1.2816	1477.84	3283.4	3998.13	2709.11	381.554	494.694	216.916	1424.78	1324.91	1250
	974	6000	345	6	Primary somatosensory cortex upper lip region layer 5	S1ULp-5	S1ULp	6000	1.1776	547.724	1948.88	2881.28	1653.36	73.0299	312.5	157.099	605.469	650.476	633.492
	1102	6100	345	6	Primary somatosensory cortex upper lip region layer 6a	S1ULp-6a	S1ULp	6100	1.28356	162.828	480.694	426.938	453.426	22.5934	381.751	222.039	352.925	491.601	450.31
	2	6200	345	6	Primary somatosensory cortex upper lip region layer 6b	S1ULp-6b	S1ULp	6200	0.33296	51.0572	114.128	285.32	156.175	12.0135	147.165	144.161	168.188	252.283	126.141
	2000	6210	322	5	Primary somatosensory cortex dysgranular zone	S1DZ	S1	6210	1.60448	1431.62	2400.15	2888.16	1907.16	297.293	1866.65	396.39	1105.65	903.72	934.259
	2287	6211	2000	6	Primary somatosensory cortex dysgranular zone 1	S1DZ-1	S1DZ	6211	0.182	1406.59	1340.66	1170.33	1170.33	681.319	1824.18	961.538	1719.78	1467.03	1631.87
	2288	6212	2000	6	Primary somatosensory cortex dysgranular zone 2/3	S1DZ-2/3	S1DZ	6212	0.3504	2739.73	4825.91	4503.42	3202.05	579.338	4129.57	422.374	1815.07	1044.52	764.84
	2289	6213	2000	6	Primary somatosensory cortex dysgranular zone 4	S1DZ-4	S1DZ	6213	0.31024	2269.21	3971.12	5054.15	3323.23	348.118	2826.84	412.584	1647.11	1502.06	1589.09
	2290	6214	2000	6	Primary somatosensory cortex dysgranular zone 5	S1DZ-5	S1DZ	6214	0.309	1009.71	1783.17	3307.44	1695.79	84.1424	427.184	255.663	640.777	669.903	873.786
	2291	6215	2000	6	Primary somatosensory cortex dysgranular zone 6a	S1DZ-6a	S1DZ	6215	0.34712	167.089	334.178	642.429	417.723	40.3319	455.174	239.11	265.038	371.629	435.008
	2292	6216	2000	6	Primary somatosensory cortex dysgranular zone 6b	S1DZ-6b	S1DZ	6216	0.10572	66.2126	160.802	283.768	236.474	18.9179	463.488	217.556	227.015	141.884	189.179
	2352	6220	322	5	Primary somatosensory cortex oral dysgranular zone	S1DZO	S1	6220	0.114	1201.75	2245.61	1526.32	1359.65	61.4035	122.807	228.07	666.667	710.526	631.579
	2353	6221	2352	6	Primary somatosensory cortex oral dysgranular zone 1	S1DZO-1	S1DZO	6221	0.01484	606.469	1752.02	1549.87	539.084	67.3854	134.771	741.24	336.927	336.927	1145.55
	2354	6222	2352	6	Primary somatosensory cortex oral dysgranular zone 2/3	S1DZO-2/3	S1DZO	6222	0.02032	3838.58	4133.86	3149.61	4281.5	295.276	49.2126	147.638	1082.68	885.827	688.976
	2355	6223	2352	6	Primary somatosensory cortex oral dysgranular zone 4	S1DZO-4	S1DZO	6223	0.02156	1252.32	3153.99	2226.35	1484.23	0	185.529	92.7644	1066.79	742.115	834.879
	2356	6224	2352	6	Primary somatosensory cortex oral dysgranular zone 5	S1DZO-5	S1DZO	6224	0.02684	670.641	2384.5	1341.28	856.93	0	37.2578	186.289	745.156	670.641	409.836
	2357	6225	2352	6	Primary somatosensory cortex oral dysgranular zone 6a	S1DZO-6a	S1DZO	6225	0.02332	128.645	600.343	128.645	128.645	0	214.408	171.527	214.408	943.396	471.698
	2358	6226	2352	6	Primary somatosensory cortex oral dysgranular zone 6b	S1DZO-6b	S1DZO	6226	0.00712	280.899	0	0	280.899	0	140.449	140.449	140.449	280.899	140.449
	2041	6230	322	5	Primary somatosensory cortex shoulder region	S1Sh	S1	6230	0.77412	2174.08	3154.55	3991.63	2384.64	596.807	3175.22	471.503	1455.85	1127.73	1480.39
	2310	6231	2041	6	Primary somatosensory cortex shoulder region 1	S1Sh-1	S1Sh	6231	0.09092	1099.87	1638.8	967.884	1077.87	1253.85	2122.75	1297.84	2188.74	1319.84	1517.82
	2311	6232	2041	6	Primary somatosensory cortex shoulder region 2/3	S1Sh-2/3	S1Sh	6232	0.16456	3354.4	3937.77	3524.55	2369.96	1002.67	5402.28	425.377	2290.96	1336.9	1355.13
	2312	6233	2041	6	Primary somatosensory cortex shoulder region 4	S1Sh-4	S1Sh	6233	0.17544	3596.67	5426.36	6372.55	3744.87	780.894	5563.16	433.197	1960.78	1635.89	2143.18
	2313	6234	2041	6	Primary somatosensory cortex shoulder region 5	S1Sh-5	S1Sh	6234	0.1584	1963.38	3125	6098.48	3023.99	189.394	1502.53	303.03	801.768	902.778	1559.34
	2314	6235	2041	6	Primary somatosensory cortex shoulder region 6a	S1Sh-6a	S1Sh	6235	0.13276	610.124	1220.25	2304.91	1461.28	105.453	986.743	338.958	354.022	655.318	1047
	2315	6236	2041	6	Primary somatosensory cortex shoulder region 6b	S1Sh-6b	S1Sh	6236	0.05204	153.728	691.776	614.912	538.048	38.432	595.696	153.728	634.128	307.456	441.968
	369	6300	322	5	Primary somatosensory cortex forelimb region	S1FL	S1	6300	3.78928	1520.87	2316.01	2846.98	1864.21	213.497	1783.72	378.964	1023.15	858.738	924.45
	450	6400	369	6	Primary somatosensory cortex forelimb region layer 1	S1FL-1	S1FL	6400	0.42796	1514.16	1544.54	1175.34	1362.28	581.83	1859.99	857.557	1993.18	1423.03	1621.65
	854	6500	369	6	Primary somatosensory cortex forelimb region layer 2/3	S1FL-2/3	S1FL	6500	0.87764	3143.66	4540.59	4595.28	3069.6	410.191	3929.86	481.974	1712.55	1129.16	954.833
	577	6600	369	6	Primary somatosensory cortex forelimb region layer 4	S1FL-4	S1FL	6600	0.64528	2281.18	3776.66	5045.87	3393.88	204.562	2853.03	460.265	1472.23	1311.06	1543.52
	625	6700	369	6	Primary somatosensory cortex forelimb region layer 5	S1FL-5	S1FL	6700	0.72532	1067.12	1832.29	3496.39	1752.33	59.2842	354.326	244.03	460.486	660.398	852.038
	945	6800	369	6	Primary somatosensory cortex forelimb region layer 6a	S1FL-6a	S1FL	6800	0.87056	101.084	392.851	456.028	338.862	22.9737	390.553	148.18	223.994	294.064	353.795
	1026	6900	369	6	Primary somatosensory cortex forelimb region layer 6b	S1FL-6b	S1FL	6900	0.24252	90.7142	90.7142	259.772	127.825	20.6169	313.376	177.305	173.182	301.006	202.045
	361	7000	322	5	Primary somatosensory cortex trunk region	S1Tr	S1	7000	1.32956	3319.14	2848.31	4173.56	2786.64	957.46	3647.82	605.463	1295.92	1278.62	1625.35
	1006	7100	361	6	Primary somatosensory cortex trunk region layer 1	S1Tr-1	S1Tr	7100	0.17956	339.719	1464.69	1175.09	785.253	1297.62	2589.66	1442.41	1748.72	930.051	969.035
	670	7200	361	6	Primary somatosensory cortex trunk region layer 2/3	S1Tr-2/3	S1Tr	7200	0.29616	4217.31	3150.32	2343.33	1789.57	1495.81	5125.61	631.415	1448.54	1178.42	1272.96
	1086	7300	361	6	Primary somatosensory cortex trunk region layer 4	S1Tr-4	S1Tr	7300	0.27424	4988.33	3956.39	6213.54	4102.25	980.893	5462.37	426.634	1706.53	1640.9	2093.06
	1111	7400	361	6	Primary somatosensory cortex trunk region layer 5	S1Tr-5	S1Tr	7400	0.27176	4400.94	3653.96	5880.19	3893.14	1008.24	3503.09	379.011	1118.63	1516.04	1884.02
	9	7500	361	6	Primary somatosensory cortex trunk region layer 6a	S1Tr-6a	S1Tr	7500	0.20812	2109.36	2157.41	5112.44	3132.81	240.246	1297.33	451.663	792.812	1090.72	1845.09
	461	7600	361	6	Primary somatosensory cortex trunk region layer 6b	S1Tr-6b	S1Tr	7600	0.09972	1002.81	641.797	2787.81	1995.59	40.1123	1474.13	451.264	431.207	952.667	1403.93
	378	7700	453	4	Secondary somatosensory cortex	S2	S	7700	6.95852	955.232	2084.49	2262.98	1682.54	456.275	654.306	341.021	1022.92	912.55	891.425
	873	7800	378	6	Secondary somatosensory cortex layer 1	S2-1	S2	7800	1.00796	995.079	994.087	1107.19	911.743	594.27	1274.85	730.188	1239.14	983.174	1363.15
	806	7900	378	6	Secondary somatosensory cortex layer 2/3	S2-2/3	S2	7900	1.48668	1310.97	3423.06	3840.1	3001.99	1173.08	809.186	334.302	1164.34	941.696	917.481
	1035	8000	378	6	Secondary somatosensory cortex layer 4	S2-4	S2	8000	1.5144	1191.89	2692.82	3138.54	2288.03	394.876	489.303	213.286	1263.21	1195.85	918.516
	1090	8100	378	6	Secondary somatosensory cortex layer 5	S2-5	S2	8100	1.3302	872.049	2145.54	2398.89	1424.6	106.751	394.677	227.034	878.063	728.462	684.108
	862	8200	378	6	Secondary somatosensory cortex layer 6a	S2-6a	S2	8200	1.213	516.9	1068.43	683.43	661.171	49.4641	565.54	342.951	750.206	802.143	808.739
	893	8300	378	6	Secondary somatosensory cortex layer 6b	S2-6b	S2	8300	0.40628	253.52	457.812	366.742	403.662	78.7634	278.133	243.674	361.819	507.039	450.428
	44	8400	315	4	Cingulate cortex area 24a (infralimbic)	A24a (IL)	Isocortex	8400	2.47528	405.611	550.645	300.976	116.35	47.2674	559.937	376.523	347.435	644.372	470.654
	707	8500	44	6	Cingulate cortex area 24a (infralimbic) layer 1	A24a (IL)-1	A24a (IL)	8500	0.64428	260.756	301.111	234.37	197.119	114.857	350.779	398.895	476.501	523.065	436.146
	747	8600	44	6	Cingulate cortex area 24a (infralimbic) layer 2/3	A24a (IL)-2	A24a (IL)	8600	0	#DIV/0!	#DIV/0!	#DIV/0!	#DIV/0!	#DIV/0!	#DIV/0!	#DIV/0!	#DIV/0!	#DIV/0!	#DIV/0!
	556	8700	44	6	Cingulate cortex area 24a (infralimbic) layer 4	A24a (IL)-2/3	A24a (IL)	8700	0.64796	631.212	739.243	642.015	158.96	49.3858	703.747	422.866	334.897	645.102	486.141
	827	8800	44	6	Cingulate cortex area 24a (infralimbic) layer 5	A24a (IL)-5	A24a (IL)	8800	0.62412	378.132	746.651	248.35	67.2948	14.4203	637.698	435.814	265.974	722.617	448.632
	1054	8900	44	6	Cingulate cortex area 24a (infralimbic) layer 6a	A24a (IL)-6a	A24a (IL)	8900	0.41904	374.666	460.577	50.1145	28.6369	2.38641	622.852	255.346	343.643	684.899	532.169
	1081	9000	44	6	Cingulate cortex area 24a (infralimbic) layer 6b	A24a (IL)-6b	A24a (IL)	9000	0.13988	243.065	221.619	14.298	28.5959	7.14898	321.704	157.278	185.874	729.196	471.833
	1057	9100	315	4	Dysgranular insular cortex	DI	Isocortex	9100	1.91104	966.489	1625.29	643.629	711.131	378.328	1133.41	431.702	945.035	823.112	927.244
	36	9200	1057	6	Dysgranular insular cortex layer 1	DI-1	DI	9200	0.2886	845.461	841.996	429.66	589.051	627.166	703.396	433.125	918.226	689.536	1084.55
	180	9300	1057	6	Dysgranular insular cortex layer 2/3	DI-2/3	DI	9300	0.50872	990.722	1743.59	717.487	988.756	562.195	1596.16	399.041	971.065	937.647	912.093
	148	9400	1057	6	Dysgranular insular cortex layer 4	DI-4	DI	9400	0.22096	638.125	1846.49	751.267	959.45	330.377	1154.06	348.479	1036.39	719.587	832.73
	187	9500	1057	6	Dysgranular insular cortex layer 5	DI-5	DI	9500	0.4722	1213.47	1882.68	624.735	453.198	196.95	927.573	398.136	910.631	783.566	853.452
	638	9600	1057	6	Dysgranular insular cortex layer 6a	DI-6a	DI	9600	0.40316	940.073	1644.51	687.072	634.984	218.276	1098.82	563.052	927.671	878.063	974.799
	662	9700	1057	6	Dysgranular insular cortex layer 6b	DI-6b	DI	9700	0.0174	344.828	919.54	172.414	229.885	114.943	862.069	287.356	804.598	804.598	862.069
	677	9800	315	4	Granular insular cortex	GI	Isocortex	9800	2.07784	1111.73	2007.85	849.921	869.653	291.168	694.471	334.482	892.273	794.575	734.417
	897	9900	677	6	Granular insular cortex layer 1	GI-1	GI	9900	0.27256	1339.15	1071.32	700.763	623.716	502.642	744.79	370.561	785.148	763.135	968.594
	1106	10000	677	6	Granular insular cortex layer 2/3	GI-2/3	GI	10000	0.411	1783.45	2824.82	1277.37	1508.52	571.776	637.47	330.9	982.968	883.212	671.533
	1010	10100	677	6	Granular insular cortex layer 4	GI-4	GI	10100	0.38388	653.85	2636.24	1039.39	1005.52	211.003	732	278.733	1109.72	823.174	698.135
	1058	10200	677	6	Granular insular cortex layer 5	GI-5	GI	10200	0.468	1258.55	2301.28	916.667	645.299	177.35	628.205	316.239	884.615	728.632	660.256
	857	10300	677	6	Granular insular cortex layer 6a	GI-6a	GI	10300	0.46148	741.094	1263.33	439.889	645.748	134.35	777.932	381.382	723.758	819.104	773.598
	849	10400	677	6	Granular insular cortex layer 6b	GI-6b	GI	10400	0.08092	370.737	580.821	234.8	383.094	86.5052	543.747	333.663	766.189	556.105	642.61
	247	10500	315	4	Auditory cortex	Au	Isocortex	10500	5.1524	959.941	1677.47	2828.78	1735.7	311.893	1583.15	478.806	1260.19	997.011	1130.54
	1011	10600	247	4	Secondary auditory cortex dorsal area	AuD	Au	10600	1.59312	1098.47	1891.89	3429.12	1928.92	434.995	2459.33	637.742	1352.69	1028.8	1205.81
	527	10700	1011	6	Secondary auditory cortex dorsal area layer 1	AuD-1	AuD	10700	0.22348	1584.03	1158.94	1020.23	1132.09	1069.45	2259.71	1038.12	1561.66	1709.33	1950.96
	600	10800	1011	6	Secondary auditory cortex dorsal area layer 2/3	AuD-2/3	AuD	10800	0.34392	1596.3	2070.25	3378.69	1959.76	651.314	3643.29	811.235	1430.57	738.544	1093.28
	678	10900	1011	6	Secondary auditory cortex dorsal area layer 4	AuD-4	AuD	10900	0.32592	1346.96	2881.08	5740.67	3454.84	552.283	3101.99	622.852	2138.56	1328.55	1782.65
	252	11000	1011	6	Secondary auditory cortex dorsal area layer 5	AuD-5	AuD	11000	0.35164	759.299	2184.05	4413.6	1842.79	88.1583	1490.16	489.137	1237.06	995.336	901.49
	156	11100	1011	6	Secondary auditory cortex dorsal area layer 6a	AuD-6a	AuD	11100	0.25844	452.716	1168.55	2251.97	1199.5	73.518	1861.17	410.153	553.32	700.356	665.532
	243	11200	1011	6	Secondary auditory cortex dorsal area layer 6b	AuD-16b	AuD	11200	0.08972	267.499	378.957	757.914	691.039	0	1604.99	267.499	434.686	434.686	434.686
	1002	11300	247	4	Primary auditory cortex	Au1	Au	11300	1.69412	922.013	1731.28	2642.67	1666.94	285.694	1682.88	497.013	1343.47	941.492	1033.57
	735	11400	1002	6	Primary auditory cortex layer 1	Au1-1	Au1	11400	0.2328	1288.66	1082.47	914.948	1125.43	859.107	1975.95	1207.04	1554.98	1357.39	1490.55
	251	11500	1002	6	Primary auditory cortex layer 2/3	Au1-2/3	Au1	11500	0.3216	1237.56	2101.99	3143.66	1993.16	435.323	2263.68	516.169	1268.66	640.547	851.99
	816	11600	1002	6	Primary auditory cortex layer 4	Au1-4	Au1	11600	0.35164	1029.46	2408.71	3719.71	2752.82	170.629	1697.76	418.041	1962.23	1436.13	1427.6
	847	11700	1002	6	Primary auditory cortex layer 5	Au1-5	Au1	11700	0.39676	579.696	1681.12	3170.68	1219.88	126.021	1189.64	360.419	1315.66	821.655	844.339
	954	11800	1002	6	Primary auditory cortex layer 6a	Au1-6a	Au1	11800	0.29388	734.994	1425.75	2082.48	1282.84	108.888	1609.5	313.053	881.312	615.898	748.605
	1005	11900	1002	6	Primary auditory cortex layer 6b	Au1-6b	Au1	11900	0.09744	574.713	738.916	769.704	944.171	20.5255	1241.79	133.415	359.195	626.026	749.179
	1018	12700	247	4	Secondary auditory cortex ventral area	AuV	Au	12700	1.86516	876.064	1445.45	2485.04	1633.1	230.543	744.172	326.514	1105.54	1020.29	1154.32
	959	12800	1018	6	Secondary auditory cortex ventral area layer 1	AuV-1	AuV	12800	0.2628	898.021	840.944	1050.23	939.878	745.814	947.489	643.075	1225.27	958.904	1464.99
	755	12900	1018	6	Secondary auditory cortex ventral area layer 2/3	AuV-2/3	AuV	12900	0.38076	1131.95	2080.05	3558.67	2421.47	238.996	433.344	204.853	1189.73	998.004	795.777
	990	13000	1018	6	Secondary auditory cortex ventral area layer 4	AuV-4	AuV	13000	0.39604	694.374	1194.32	3050.2	1835.67	65.6499	295.425	148.975	1191.8	1295.32	1287.75
	1023	13100	1018	6	Secondary auditory cortex ventral area layer 5	AuV-5	AuV	13100	0.41444	1006.18	1913.43	2975.1	1582.86	171.316	883.119	366.76	1044.78	948.268	1177.49
	520	13200	1018	6	Secondary auditory cortex ventral area layer 6a	AuV-6a	AuV	13200	0.31104	829.475	1199.2	1591.44	1327.8	93.2356	1234.57	414.738	990.226	942.001	1199.2
	598	13300	1018	6	Secondary auditory cortex ventral area layer 6b	AuV-6b	AuV	13300	0.10008	169.864	439.648	679.456	809.353	169.864	1069.14	219.824	739.408	719.424	939.249
	669	13400	315	4	Visual cortex	V	Isocortex	13400	15.2196	1346.29	2263.53	4028.89	2516.96	1129.14	1695.91	535.692	951.079	712.898	869.736
	2170	14010	669	4	Secondary visual cortex lateral area	V2L	V	14010	3.432	1495.34	2459.79	4191.14	2645.69	881.993	1906.18	575.466	1137.24	803.613	973.776
	402	14100	2170	5	Secondary visual cortex lateral area anterior region	V2La	V2L	14100	2.17048	1984.35	3097.01	4913.2	3288.21	1122.33	2396.24	612.768	1350.39	1010.84	1188.22
	1074	14200	402	6	Secondary visual cortex lateral area anterior region layer1	V2La-1	V2La	14200	0.3188	1558.97	1348.81	1170.01	1104.14	1047.68	2098.49	834.379	1599.75	1593.48	1659.35
	905	14300	402	6	Secondary visual cortex lateral area anterior region layer2/3	V2La-2/3	V2La	14300	0.44848	2617.73	3389.23	4800.66	2706.92	2147.25	2780.5	651.088	1346.77	664.467	780.414
	1114	14400	402	6	Secondary visual cortex lateral area anterior region layer4	V2La-4	V2La	14400	0.43092	3390.42	5618.21	7739.26	5945.42	1895.94	4223.52	501.253	2350.78	1424.86	1680.13
	233	14500	402	6	Secondary visual cortex lateral area anterior region layer5	V2La-5	V2La	14500	0.48976	1623.24	3383.29	6107.07	3842.7	416.531	1435.4	490.036	1051.54	955.57	1053.58
	601	14600	402	6	Secondary visual cortex lateral area anterior region layer6a	V2La-6a	V2La	14600	0.34332	996.155	1852.5	4377.84	2697.19	291.273	1517.53	696.144	731.096	713.62	1179.66
	649	14700	402	6	Secondary visual cortex lateral area anterior region layer6b	V2La-6b	V2La	14700	0.1392	272.989	416.667	2219.83	1443.97	129.31	1731.32	553.161	272.989	438.218	395.115
	409	14800	2170	5	Secondary visual cortex lateral area intermediate region	V2Li	V2L	14800	0.81196	795.606	1533.33	3219.37	1810.43	549.288	1152.77	552.983	869.501	506.183	658.899
	421	14900	409	6	Secondary visual cortex lateral area intermediate region layer1	V2Li-1	V2Li	14900	0.11068	1039.03	894.471	858.33	1075.17	460.788	2087.1	713.769	1427.54	777.015	1219.73
	973	15000	409	6	Secondary visual cortex lateral area intermediate region layer2/3	V2Li-2/3	V2Li	15000	0.14792	932.937	1940.24	4306.38	3245	1007.3	730.124	635.479	885.614	378.583	574.635
	573	15100	409	6	Secondary visual cortex lateral area intermediate region layer4	V2Li-4	V2Li	15100	0.15588	955.863	2418.53	5446.5	2367.21	898.127	712.086	442.648	1148.32	558.122	481.139
	613	15200	409	6	Secondary visual cortex lateral area intermediate region layer5	V2Li-5	V2Li	15200	0.17476	595.102	1527.81	3770.89	1544.98	303.273	858.32	452.049	732.433	486.381	612.268
	74	15300	409	6	Secondary visual cortex lateral area intermediate region layer6a	V2Li-6a	V2Li	15300	0.1806	703.212	1035.44	1932.45	1184.94	287.929	1611.3	603.544	564.784	476.19	620.155
	121	15400	409	6	Secondary visual cortex lateral area intermediate region layer6b	V2Li-6b	V2Li	15400	0.04212	308.642	664.767	593.542	427.35	23.7417	1068.38	451.092	189.934	261.159	498.575
	425	15500	2170	5	Secondary visual cortex lateral area posterior region	V2Lp	V2L	15500	0.44956	398.167	1056.59	2460.18	1052.14	322.538	900.881	435.982	591.69	340.333	507.163
	750	15600	425	6	Secondary visual cortex lateral area posterior region layer1	V2Lp-1	V2Lp	15600	0.0612	343.137	441.176	653.595	555.556	261.438	735.294	196.078	637.255	359.477	588.235
	269	15700	425	6	Secondary visual cortex lateral area posterior region layer2/3	V2Lp-2/3	V2Lp	15700	0.09	388.889	1177.78	3122.22	1544.44	333.333	822.222	388.889	1000	433.333	611.111
	869	15800	425	6	Secondary visual cortex lateral area posterior region layer4	V2Lp-4	V2Lp	15800	0.09336	353.47	1306.77	4145.24	1274.64	332.048	428.449	514.139	514.139	417.738	460.583
	902	15900	425	6	Secondary visual cortex lateral area posterior region layer15	V2Lp-5	V2Lp	15900	0.12208	434.142	1171.36	2187.09	1032.11	393.185	1228.7	573.394	409.567	327.654	516.055
	377	16000	425	6	Secondary visual cortex lateral area posterior region layer6a	V2Lp-6a	V2Lp	16000	0.07468	482.057	1017.68	1754.15	709.695	267.809	1164.97	401.714	508.838	160.686	415.104
	393	16100	425	6	Secondary visual cortex lateral area posterior region layer6b	V2Lp-6b	V2Lp	16100	0.00824	121.359	121.359	0	242.718	0	1092.23	121.359	121.359	121.359	0
	2096	16110	669	4	Secondary Visual Cortex Medial area	V2M	V	16110	4.09736	1376.01	1738.19	3398.29	2084.02	914.491	2268.29	564.998	920.349	655.544	1135.37
	2097	16120	2096	5	Secondary visual cortex mediolateral area	V2ML	V2M	16120	1.48572	2059.61	2431.82	4331.23	2820.85	1274.8	2403.55	634.709	1192.69	815.766	1273.46
	2393	16130	2097	6	Secondary visual cortex mediolateral area layer1	V2ML-1	V2ML	16130	0.23164	362.632	375.583	548.265	263.34	548.265	1735.45	492.143	768.434	574.167	1372.82
	2409	16140	2097	6	Secondary visual cortex mediolateral area layer2/3	V2ML-2/3	V2ML	16140	0.41248	2475.27	2196.47	2964.99	2552.85	1818.27	2955.29	739.43	1469.16	700.64	1105.51
	2410	16150	2097	6	Secondary visual cortex mediolateral area layer4	V2ML-4	V2ML	16150	0.18564	4104.72	4778.07	7616.89	5079.72	2558.72	4503.34	743.374	2230.12	1174.32	2704.16
	2411	16160	2097	6	Secondary visual cortex mediolateral area layer5	V2ML-5	V2ML	16160	0.35536	2090.84	3219.27	6038.95	3787.71	979.289	1589.94	559.995	996.173	979.289	813.26
	2412	16170	2097	6	Secondary visual cortex mediolateral area layer6a	V2ML-6a	V2ML	16170	0.23068	1530.26	2163.17	5314.72	2666.03	741.287	1755.68	615.571	771.632	749.957	1057.74
	2413	16180	2097	6	Secondary visual cortex mediolateral area layer6b	V2ML-6b	V2ML	16180	0.06992	1387.3	1287.19	4276.32	2474.26	328.947	2059.5	643.593	600.686	729.405	1187.07
	394	16200	2096	5	Secondary visual cortex mediomedial area anterior region	V2MMa	V2M	16200	1.40012	1547.72	1901.27	2980.46	2134.82	683.513	3411.85	741.365	1214.9	870.64	1639.15
	281	16300	394	6	Secondary visual cortex mediomedial area anterior region layer1	V2MMa-1	V2MMa	16300	0.24216	103.238	346.878	202.346	231.252	545.094	1647.67	565.742	532.706	491.411	1420.55
	1066	16400	394	6	Secondary visual cortex mediomedial area anterior region layer2/3	V2MMa-2/3	V2MMa	16400	0.39768	1855.76	1802.96	2087.11	1639.51	764.434	3882.52	859.988	1772.78	739.288	1923.66
	401	16500	394	6	Secondary visual cortex mediomedial area anterior region layer4	V2MMa-4	V2MMa	16500	0.04924	4325.75	3939.89	6519.09	5666.13	1259.14	5889.52	995.126	2701.06	1502.84	4163.28
	433	16600	394	6	Secondary visual cortex mediomedial area anterior region layer5	V2MMa-5	V2MMa	16600	0.36548	1592.43	2478.93	4424.32	2859.25	530.809	3370.91	664.879	949.436	1058.88	1351.65
	1046	16700	394	6	Secondary visual cortex mediomedial area anterior region layer6a	V2MMa-6a	V2MMa	16700	0.28428	1730.69	2279.44	3908.12	2821.16	805.544	3693.54	717.602	1104.54	984.944	1364.85
	441	16800	394	6	Secondary visual cortex mediomedial area anterior region layer6b	V2MMa-6b	V2MMa	16800	0.06128	1909.27	1843.99	3998.04	2529.37	587.467	4275.46	1028.07	1191.25	1060.7	1615.54
	533	16900	2096	5	Secondary visual cortex mediomedial area posterior region	V2MMp	V2M	16900	1.21152	339.243	699.122	2737.06	1121.73	739.567	780.837	275.687	245.972	210.479	383.815
	805	17000	533	6	Secondary visual cortex mediomedial area posterior region layer1	V2MMp-1	V2MMp	17000	0.3036	319.499	388.669	1445.98	951.91	474.308	823.452	194.335	191.041	194.335	260.211
	41	17100	533	6	Secondary visual cortex mediomedial area posterior region layer2/3	V2MMp-2/3	V2MMp	17100	0.33012	178.723	708.833	2605.11	1032.96	787.592	851.206	260.511	236.278	109.051	215.073
	501	17200	533	6	Secondary visual cortex mediomedial area posterior region layer4	V2MMp-4	V2MMp	17200	0.1524	262.467	807.087	4258.53	1568.24	1233.6	505.249	295.276	308.399	282.152	748.031
	565	17300	533	6	Secondary visual cortex mediomedial area posterior region layer5	V2MMp-5	V2MMp	17300	0.23936	292.447	710.227	3551.14	1219.92	680.983	451.203	334.225	229.779	213.068	371.825
	257	17400	533	6	Secondary visual cortex mediomedial area posterior region layer6a	V2MMp-6a	V2MMp	17400	0.1724	788.863	1090.49	2848.03	1113.69	788.863	1177.49	336.427	336.427	313.225	597.448
	469	17500	533	6	Secondary visual cortex mediomedial area posterior region layer6b	V2MMp-6b	V2MMp	17500	0.01364	659.824	1026.39	1979.47	439.883	366.569	1979.47	439.883	146.628	879.765	659.824
	385	17600	669	4	Primary visual cortex	V1	V	17600	7.6902	1263.95	2455.85	4292.48	2690.18	1353.8	1297.11	502.328	884.372	702.973	681.777
	593	17700	385	6	Primary visual cortex layer1	V1-1	V1	17700	0.49504	438.348	773.675	818.116	749.434	480.769	1048.4	535.31	828.216	391.888	721.154
	821	17800	385	6	Primary visual cortex layer2/3	V1-2/3	V1	17800	0.73192	1546.62	2194.23	3769.54	2130.01	1836.27	1705.1	472.729	722.757	441.305	366.16
	721	17900	385	6	Primary visual cortex layer4	V1-4	V1	17900	0.58836	2238.43	3479.16	5909.65	3598.14	1942.69	2257.12	472.5	1332.52	1058.88	1096.27
	778	18000	385	6	Primary visual cortex layer5	V1-5	V1	18000	0.4622	1289.49	3717.01	5794.03	3589.36	729.122	1174.82	372.133	867.59	863.263	969.277
	33	18100	385	6	Primary visual cortex layer6a	V1-6a	V1	18100	0.35004	1257	2456.86	4853.73	2636.84	717.061	1177.01	405.668	685.636	568.506	1068.45
	305	18200	385	6	Primary visual cortex layer6b	V1-6b	V1	18200	0.07616	590.861	1339.29	4254.2	2455.36	131.303	1969.54	380.777	498.95	787.815	958.508
	2098	18210	385	5	Primary visual cortex monocular area	V1M	V1	18210	2.42124	1255.56	2328.97	4209	2693.25	1478.58	1319.16	630.256	885.91	769.027	677.752
	2428	18220	2098	6	Primary visual cortex monocular area layer1	V1M-1	V1M	18220	0.33116	622.056	576.76	603.938	326.126	383.5	1684.99	585.82	872.69	788.139	797.198
	2429	18230	2098	6	Primary visual cortex monocular area layer2/3	V1M-2/3	V1M	18230	0.55868	1632.42	2604.35	3968.28	2946.23	2566.76	1451.64	698.074	927.186	617.527	483.282
	2430	18240	2098	6	Primary visual cortex monocular area layer4	V1M-4	V1M	18240	0.4216	2447.82	4352.47	6674.57	5016.6	3043.17	1548.86	702.087	1349.62	1043.64	993.833
	2431	18250	2098	6	Primary visual cortex monocular area layer5	V1M-5	V1M	18250	0.54148	879.072	2445.15	5289.21	3069.37	895.693	851.37	618.675	893.846	890.153	539.263
	2432	18260	2098	6	Primary visual cortex monocular area layer6a	V1M-6a	V1M	18260	0.41912	858.943	1748.9	4199.27	1977.95	567.856	1140.48	584.558	575.014	598.874	789.75
	2433	18270	2098	6	Primary visual cortex monocular area layer16b	V1M-6b	V1M	18270	0.1492	361.93	676.944	2252.01	1079.09	87.1314	1561.66	442.359	294.906	556.3	435.657
	2133	18280	385	5	Primary visual cortex binocular area	V1B	V1	18280	2.49736	1172.84	2604.35	4582.44	2927.89	1400.28	1021.08	435.66	897.748	697.136	567.8
	2434	18290	2133	6	Primary visual cortex binocular area layer1	V1B-1	V1B	18290	0.32868	997.931	943.167	578.07	848.85	693.684	1828.53	450.286	1067.91	757.576	836.68
	2435	18291	2133	6	Primary visual cortex binocular area layer2/3	V1B-2/3	V1B	18291	0.52832	1673.23	3463.81	5701.09	3083.36	2642.34	724.939	592.444	859.328	677.62	353.952
	2436	18292	2133	6	Primary visual cortex binocular area layer4	V1B-4	V1B	18292	0.45152	2179.31	4781.63	6878.99	5516.92	2899.1	914.688	425.23	1386.43	1012.14	697.644
	2437	18293	2133	6	Primary visual cortex binocular area layer5	V1B-5	V1B	18293	0.5544	862.193	2644.3	5721.5	3190.84	687.229	672.799	400.433	992.063	777.417	658.369
	2438	18294	2133	6	Primary visual cortex binocular area layer6a	V1B-6a	V1B	18294	0.47456	499.41	1439.23	3594.91	2046.11	362.441	1154.75	349.798	482.552	425.657	507.839
	2439	18295	2133	6	Primary visual cortex binocular area layer6b	V1B-6b	V1B	18295	0.15988	112.584	350.263	1613.71	1082.06	68.8016	1451.09	293.97	200.15	275.206	218.914
	31	18300	315	4	Cingulate cortex	A24 (Cg)	Isocortex	18300	3.69212	1633.21	1985.58	2190.61	1412.47	209.636	1572.27	460.44	1030.84	1328.23	1652.44
	2345	18810	31	4	Cingulate cortex area 24b	A24b (Cg1)	A24 (Cg)	18810	2.14288	1509.18	1850.78	1666.92	1151.72	125.532	1492.85	439.129	949.19	1280.05	1332.32
	2346	18820	2345	6	Cingulate cortex area 24b layer1	A24b (Cg1)-1	A24b (Cg1)	18820	0.52848	1472.15	1655.69	1614.06	1559.19	316.001	2439.07	790.948	1362.4	1754.09	1648.12
	2347	18830	2345	6	Cingulate cortex area 24b layer2/3	A24b (Cg1)-2/3	A24b (Cg1)	18830	0.67508	2377.5	2932.99	2565.62	1916.81	121.467	1859.04	388.102	1370.21	1690.17	1896.07
	2348	18840	2345	6	Cingulate cortex area 24b layer5	A24b (Cg1)-5	A24b (Cg1)	18840	0.55096	1058.15	1573.62	1511.91	528.169	30.8552	709.67	301.292	537.244	900.247	896.617
	2349	18850	2345	6	Cingulate cortex area 24b layer6a	A24b (Cg1)-6a	A24b (Cg1)	18850	0.3292	707.776	735.115	455.65	148.846	9.113	735.115	267.315	255.164	437.424	577.157
	2350	18860	2345	6	Cingulate cortex area 24b layer6b	A24b (Cg1)-6b	A24b (Cg1)	18860	0.05916	591.616	33.8066	67.6133	169.033	0	371.873	118.323	152.13	591.616	338.066
	39	18900	31	4	Cingulate cortex area 24b'	A24b' (Cg1)	A24 (Cg)	18900	0.73224	3157.43	3418.28	4758	3011.31	628.209	2943.02	707.418	1890.09	2332.57	3284.44
	935	19000	39	6	Cingulate cortex area 24b' layer1	A24b' (Cg1)-1	A24b' (Cg1)	19000	0.18164	2378.33	1921.38	2488.44	2103.06	803.788	3738.16	979.96	2130.59	1778.24	2389.34
	211	19100	39	6	Cingulate cortex area 24b' layer2/3	A24b' (Cg1)-2/3	A24b' (Cg1)	19100	0.24776	4681.95	4500.32	6070.39	4036.16	1045.37	3539.72	750.727	2607.36	3152.24	4237.97
	1015	19200	39	6	Cingulate cortex area 24b' layer5	A24b' (Cg1)-5	A24b' (Cg1)	19200	0.19736	2984.39	3876.17	5983.99	3410.01	233.077	2497.97	618.16	1489.66	2503.04	3460.68
	919	19300	39	6	Cingulate cortex area 24b' layer6a	A24b' (Cg1)-6a	A24b' (Cg1)	19300	0.09496	1316.34	2811.71	3622.58	1548.02	94.7767	1000.42	336.984	579.191	1063.61	2422.07
	927	19400	39	6	Cingulate cortex area 24b' layer6b	A24b' (Cg1)-6b	A24b' (Cg1)	19400	0.01052	570.342	665.399	285.171	285.171	0	1045.63	0	190.114	855.513	760.456
	48	19500	31	4	Cingulate cortex area 24a'	A24a' (Cg2)	A24 (Cg)	19500	0.817	592.411	1055.08	1263.16	663.403	55.0796	552.02	294.982	474.908	554.468	1029.38
	588	19600	48	6	Cingulate cortex area 24a' layer1	A24a' (Cg2)-1	A24a' (Cg2)	19600	0.20676	386.922	943.122	662.604	831.882	145.096	885.084	643.258	846.392	967.305	1470.3
	296	19700	48	6	Cingulate cortex area 24a' layer2/3	A24a' (Cg2)-2/3	A24a' (Cg2)	19700	0.28468	997.611	1556.13	1847.69	839.539	42.1526	396.937	182.661	456.653	555.009	976.535
	772	19800	48	6	Cingulate cortex area 24a' layer5	A24a' (Cg2)-5	A24a' (Cg2)	19800	0.14648	416.439	928.454	1542.87	512.015	6.82687	245.767	136.537	327.69	348.17	907.974
	810	19900	48	6	Cingulate cortex area 24a' layer6a	A24a' (Cg2)-6a	A24a' (Cg2)	19900	0.14404	367.953	534.574	902.527	298.528	6.94252	610.941	208.275	159.678	229.103	708.137
	819	20000	48	6	Cingulate cortex area 24a' layer6b	A24a' (Cg2)-6b	A24a' (Cg2)	20000	0.03504	171.233	313.927	371.005	371.005	28.5388	884.703	171.233	342.466	313.927	684.932
	972	20100	315	4	Cingulate cortex area 32 (Prelimbic cortex)	A32 (PrL)	Isocortex	20100	2.0478	332.064	485.399	176.287	127.942	39.5546	436.566	214.865	272.976	485.887	190.937
	171	20200	972	6	Cingulate cortex area 32 (Prelimbic cortex) layer1	A32 (PrL)-1	A32 (PrL)	20200	0.47712	326.962	484.155	362.592	285.044	71.2609	725.184	289.235	433.853	714.705	301.811
	195	20300	972	6	Cingulate cortex area 32 (Prelimbic cortex) layer2	A32 (PrL)-2	A32 (PrL)	20300	0	#DIV/0!	#DIV/0!	#DIV/0!	#DIV/0!	#DIV/0!	#DIV/0!	#DIV/0!	#DIV/0!	#DIV/0!	#DIV/0!
	304	20400	972	6	Cingulate cortex area 32 (Prelimbic cortex) layer2/3	A32 (PrL)-2/3	A32 (PrL)	20400	0.59568	399.543	535.522	159.482	154.445	47.0051	320.642	130.943	229.989	421.367	186.342
	363	20500	972	6	Cingulate cortex area 32 (Prelimbic cortex) layer5	A32 (PrL)-5	A32 (PrL)	20500	0.73804	317.056	513.522	115.17	42.0031	25.7439	344.155	233.05	211.371	395.643	120.59
	84	20600	972	6	Cingulate cortex area 32 (Prelimbic cortex) layer6a	A32 (PrL)-6a	A32 (PrL)	20600	0.23696	219.446	274.308	33.761	12.6604	0	434.673	219.446	248.987	468.433	198.346
	132	20700	972	6	Cingulate cortex area 32 (Prelimbic cortex) layer6b	A32 (PrL)-6b	A32 (PrL)	20700	0	#DIV/0!	#DIV/0!	#DIV/0!	#DIV/0!	#DIV/0!	#DIV/0!	#DIV/0!	#DIV/0!	#DIV/0!	#DIV/0!
	714	20800	315	4	Orbital cortex	O	Isocortex	20800	5.50052	212.889	676.118	319.424	131.079	38.7236	326.333	262.702	369.056	415.415	258.157
	723	21400	714	4	Lateral orbital cortex	LO	O	21400	2.81524	159.489	636.535	321.82	149.188	33.3897	119.706	301.928	410.622	433.356	203.18
	448	21500	723	6	Lateral orbital cortex layer1	LO-1	LO	21500	0.66592	366.41	891.999	534.599	252.283	63.0706	333.373	668.248	770.363	788.383	458.013
	412	21600	723	6	Lateral orbital cortex layer2/3	LO-2/3	LO	21600	1.2422	123.169	618.258	285.783	143.294	33.811	70.037	180.325	238.287	319.594	113.508
	630	21700	723	6	Lateral orbital cortex layer5	LO-5	LO	21700	0.76848	53.3521	463.252	206.902	71.5699	13.0127	28.6279	191.287	348.74	296.69	106.704
	440	21800	723	6	Lateral orbital cortex layer6a	LO-6a	LO	21800	0.09136	120.403	459.72	65.6743	98.5114	0	43.7828	186.077	251.751	197.023	153.24
	488	21900	723	6	Lateral orbital cortex layer6b	LO-6b	LO	21900	0	#DIV/0!	#DIV/0!	#DIV/0!	#DIV/0!	#DIV/0!	#DIV/0!	#DIV/0!	#DIV/0!	#DIV/0!	#DIV/0!
	731	22000	714	4	Medial orbital cortex	MO	ORB	22000	1.42692	290.135	662.266	350.405	124.744	33.6389	564.152	211.645	307.656	383.343	285.23
	484	22100	731	6	Medial orbital cortex layer1	MO-1	ORBm	22100	0.4622	558.2	776.72	733.449	331.026	93.0333	850.281	369.97	577.672	584.163	623.107
	524	22200	731	6	Medial orbital cortex layer2/3	MO-2/3	ORBm	22200	0	#DIV/0!	#DIV/0!	#DIV/0!	#DIV/0!	#DIV/0!	#DIV/0!	#DIV/0!	#DIV/0!	#DIV/0!	#DIV/0!
	582	22300	731	6	Medial orbital cortex layer5	MO-5	ORBm	22300	0.56028	210.609	787.106	223.103	32.1268	5.35447	631.827	119.583	189.191	249.875	164.204
	620	22400	731	6	Medial orbital cortex layer6a	MO-6a	ORBm	22400	0.36364	98.999	387.746	93.4991	19.2498	5.49995	148.499	170.498	173.248	343.747	71.4993
	910	22500	731	6	Medial orbital cortex layer6b	MO-6b	ORBm	22500	0.00936	213.675	106.838	0	0	0	320.513	106.838	0	320.513	106.838
	738	22600	714	4	Ventral orbital cortex	VO	O	22600	1.25836	244.763	780.381	278.934	97.7463	56.4226	518.929	232.843	345.688	411.647	350.456
	2320	22610	738	6	Orbital cortex ventral part layer 1	VO-1	VO	22610	0.3868	573.94	873.837	597.208	175.801	170.631	778.18	444.674	586.867	741.986	708.376
	2321	22620	738	6	Orbital cortex ventral part layer 2/3	VO-2/3	VO	22620	0.59832	123.68	845.701	145.407	78.5533	3.34269	539.845	113.652	200.562	262.401	222.289
	2322	22630	738	6	Orbital cortex ventral part layer 5	VO-5	VO	22630	0.18064	38.7511	465.013	94.1098	5.53587	16.6076	105.182	160.54	193.756	215.899	27.6794
	2323	22640	738	6	Orbital cortex ventral part layer 6a	VO-6a	VO	22640	0.05272	37.9363	474.203	75.8725	0	0	113.809	208.649	170.713	265.554	56.9044
	2324	22650	738	6	Orbital cortex ventral part layer 6b	VO-6b	VO	22650	0.00744	403.226	134.409	0	0	0	403.226	0	268.817	268.817	0
	95	23300	315	4	Agranular insular cortex	AI	Isocortex	23300	5.675	595.947	1192.6	697.974	579.559	282.115	771.454	401.762	726.344	677.885	609.515
	2331	23310	95	6	Agranular insular cortex layer 1	AI1	AI	23310	0.04744	337.268	569.14	569.14	400.506	210.793	295.11	463.744	505.902	400.506	442.664
	2332	23320	95	6	Agranular insular cortex layer 2/3	AI2/3	AI	23320	0.06864	43.7063	1092.66	568.182	291.375	72.8438	87.4126	320.513	262.238	218.531	101.981
	2333	23330	95	6	Agranular insular cortex layer 5	AI5	AI	23330	0.04924	203.087	243.704	203.087	101.543	0	20.3087	162.47	304.63	426.483	101.543
	104	23400	95	4	Agranular insular cortex dorsal part	AID	AI	23400	2.71268	354.999	835.336	465.591	311.869	121.651	245.514	258.416	466.329	499.137	404.397
	996	23500	104	6	Agranular insular cortex dorsal part layer1	AID-1	AID	23500	0.37372	307.717	610.082	449.534	489.671	436.155	163.224	363.909	577.973	703.735	580.649
	328	23600	104	6	Agranular insular cortex dorsal part layer2/3	AID-2/3	AID	23600	0.7782	318.684	931.637	358.52	221.023	88.6662	177.332	178.617	367.515	415.06	331.534
	1101	23700	104	6	Agranular insular cortex dorsal part layer5	AID-5	AID	23700	0.58696	284.517	735.996	296.443	204.443	35.7776	233.406	226.591	512.812	579.256	410.59
	783	23800	104	6	Agranular insular cortex dorsal part layer6a	AID-6a	AID	23800	0.23048	1162.79	1653.07	880.771	542.346	65.0816	880.771	511.975	906.803	911.142	1058.66
	831	23900	104	6	Agranular insular cortex dorsal part layer6b	AID-6b	AID	23900	0.00096	0	1041.67	0	0	0	0	0	0	1041.67	0
need to check, could be level 5?	2020	23910	104	4	Dorsolateral orbital cortex	DLO	AID	23910	0.74236	222.264	672.181	591.357	331.376	83.5174	171.076	235.735	340.805	292.311	184.547
	2326	23920	2020	6	Dorsolateral orbital cortex layer 1	DLO-1	DLO	23920	0.23424	580.601	832.48	994.706	653.176	192.111	397.029	473.873	661.714	409.836	388.49
	2327	23930	2020	6	Dorsolateral orbital cortex layer 2/3	DLO-2/3	DLO	23930	0.3672	68.0828	697.168	490.196	220.588	40.8497	89.8693	103.486	185.185	234.205	106.209
	2328	23940	2020	6	Dorsolateral orbital cortex layer 5	DLO-5	DLO	23940	0.14092	28.3849	340.619	184.502	85.1547	14.1924	7.09622	184.502	212.887	248.368	49.6736
	2329	23950	2020	6	Dorsolateral orbital cortex layer 6a	DLO-6a	DLO	23950	0	#DIV/0!	#DIV/0!	#DIV/0!	#DIV/0!	#DIV/0!	#DIV/0!	#DIV/0!	#DIV/0!	#DIV/0!	#DIV/0!
	2330	23960	2020	6	Dorsolateral orbital cortex layer 6b	DLO-6b	DLO	23960	0	#DIV/0!	#DIV/0!	#DIV/0!	#DIV/0!	#DIV/0!	#DIV/0!	#DIV/0!	#DIV/0!	#DIV/0!	#DIV/0!
	111	24000	95	4	Agranular insular cortex posterior part	AIP	AI	24000	1.19016	1236.81	1918.23	1098.17	1249.41	734.355	2262.72	686.462	1365.36	1069.6	1214.12
	120	24100	111	6	Agranular insular cortex posterior part layer1	AIP-1	AIP	24100	0.26968	600.712	1071.64	485.761	574.755	841.738	1149.51	1045.68	1420.2	1134.68	1023.44
	163	24200	111	6	Agranular insular cortex posterior part layer2/3	AIP-2/3	AIP	24200	0.56632	1553.89	2295.52	1421.46	1847.01	980.011	3340.87	618.025	1444.41	1190.14	1495.62
	344	24300	111	6	Agranular insular cortex posterior part layer5	AIP-5	AIP	24300	0.23924	1086.77	1772.28	1070.06	911.219	300.953	1571.64	438.89	1145.29	744.023	819.261
	314	24400	111	6	Agranular insular cortex posterior part layer6a	AIP-6a	AIP	24400	0.11492	1479.29	2349.46	1000.7	591.716	174.034	1000.7	696.136	1305.26	1000.7	1096.41
	355	24500	111	6	Agranular insular cortex posterior part layer6b	AIP-6b	AIP	24500	0	#DIV/0!	#DIV/0!	#DIV/0!	#DIV/0!	#DIV/0!	#DIV/0!	#DIV/0!	#DIV/0!	#DIV/0!	#DIV/0!
	119	24600	95	4	Agranular insular cortex ventral part	AIV	AI	24600	1.60684	571.308	1310.02	818.376	567.574	237.734	621.095	441.861	731.249	725.026	550.148
	704	24700	119	6	Agranular insular cortex ventral part layer1	AIV-1	AIV	24700	0.32496	726.243	932.422	735.475	661.62	667.774	667.774	606.228	1040.13	984.737	649.311
	694	24800	119	6	Agranular insular cortex ventral part layer2/3	AIV-2/3	AIV	24800	0.55608	600.633	1569.92	942.31	606.028	172.637	728.312	445.979	595.238	658.179	517.911
	800	24900	119	6	Agranular insular cortex ventral part layer5	AIV-5	AIV	24900	0.5312	365.211	1244.35	779.367	530.873	111.069	500.753	321.913	696.536	641.943	534.639
	675	25000	119	6	Agranular insular cortex ventral part layer6a	AIV-6a	AIV	25000	0.1946	791.367	1377.18	709.147	400.822	51.3875	565.262	483.042	698.869	709.147	519.013
	699	25100	119	6	Agranular insular cortex ventral part layer6b	AIV-6b	AIV	25100	0	#DIV/0!	#DIV/0!	#DIV/0!	#DIV/0!	#DIV/0!	#DIV/0!	#DIV/0!	#DIV/0!	#DIV/0!	#DIV/0!
	254	25200	315	4	Cingulate cortex area 29 and 30 (retrosplenial cortex)	A29-30 (RS)	Isocortex	25200	7.40056	1375.84	1935.12	3001.66	1990.39	657.788	2670.2	501.584	844.26	763.726	1243.28
	879	25900	254	4	Cingulate cortex area 30 (Retrosplenial dysgranular cortex)	A30 (RSD)	RS	25900	3.53336	1253.48	1597.91	2698.85	1528.01	497.543	2593.57	444.336	729.334	528.392	1115.93
	442	26000	879	6	Cingulate cortex area 30 (Retrosplenial dysgranular cortex) layer1	A30 (RSD)-1	A30 (RSD)	26000	0.76316	361.654	560.826	779.653	518.895	516.274	1707.37	327.585	497.93	225.379	915.929
	434	26100	879	6	Cingulate cortex area 30 (Retrosplenial dysgranular cortex) layer2/3	A30 (RSD)-2/3	A30 (RSD)	26100	1.02208	1414.76	1543.91	2224.87	1445.09	510.723	2322.71	353.201	681.943	415.819	1131.03
	545	26200	879	6	Cingulate cortex area 30 (Retrosplenial dysgranular cortex) layer4	A30 (RSD)-4	A30 (RSD)	26200	0.00128	0	781.25	3125	0	0	0	0	0	781.25	1562.5
	610	26300	879	6	Cingulate cortex area 30 (Retrosplenial dysgranular cortex) layer5	A30 (RSD)-5	A30 (RSD)	26300	0.9444	1513.13	1904.91	3468.87	2100.8	327.192	2761.54	515.671	821.686	607.793	1024.99
	274	26400	879	6	Cingulate cortex area 30 (Retrosplenial dysgranular cortex) layer6a	A30 (RSD)-6a	A30 (RSD)	26400	0.68404	1616.86	2331.73	4201.51	1904.86	709.023	3587.51	564.294	906.38	882.989	1339.1
	330	26500	879	6	Cingulate cortex area 30 (Retrosplenial dysgranular cortex) layer6b	A30 (RSD)-6b	A30 (RSD)	26500	0.1184	1452.7	2069.26	4332.77	2018.58	405.405	3589.53	726.351	878.378	768.581	1706.08
	886	26600	254	4	Cingulate cortex area 29 (Retrosplenial granular cortex)	A29 (RSG)	RS	26600	3.8672	1487.64	2243.23	3278.34	2412.86	804.199	2740.23	553.889	949.266	978.744	1359.64
	2132	26610	886	5	Cingulate cortex area 29c (Retrosplenial granular cortex c)	A29c (RSGc)	A29 (RSG)	26610	2.37024	1860.99	2675.68	3951.08	2805.62	938.724	2755.42	422.742	1143.77	1227.72	1737.38
	542	26700	2132	6	Cingulate cortex area 29c (Retrosplenial granular cortex c) layer1	A29c (RSGc)-1	A29c (RSGc)	26700	0.52824	1546.65	1851.43	1934.73	2173.25	1009.01	2843.4	730.728	1754.88	1694.31	2158.11
	606	26800	2132	6	Cingulate cortex area 29c (Retrosplenial granular cortex c) layer2	A29c (RSGc)-2	A29c (RSGc)	26800	0	#DIV/0!	#DIV/0!	#DIV/0!	#DIV/0!	#DIV/0!	#DIV/0!	#DIV/0!	#DIV/0!	#DIV/0!	#DIV/0!
	430	26900	2132	6	Cingulate cortex area 29c (Retrosplenial granular cortex c) layer2/3	A29c (RSGc)-2/3	A29c (RSGc)	26900	0.91332	2476.68	3688.74	4874.52	3590.2	1461.7	2565.37	292.34	1169.36	1330.31	1925.94
	687	27000	2132	6	Cingulate cortex area 29c (Retrosplenial granular cortex c) layer5	A29c (RSGc)-5	A29c (RSGc)	27000	0.53792	1526.25	2647.23	4558.3	2961.41	507.51	3251.41	330.904	875.595	914.634	1437.02
	590	27100	2132	6	Cingulate cortex area 29c (Retrosplenial granular cortex c) layer6a	A29c (RSGc)-6a	A29c (RSGc)	27100	0.3326	1407.1	1536.38	3761.27	1632.59	225.496	2420.32	435.959	646.422	769.693	1109.44
	622	27200	2132	6	Cingulate cortex area 29c (Retrosplenial granular cortex c) layer6b	A29c (RSGc)-6b	A29c (RSGc)	27200	0.05816	739.34	1031.64	3232.46	1495.87	154.746	2269.6	447.043	515.818	894.085	1323.93
	2066	27210	886	5	Cingulate cortex area 29b (Retrosplenial granular cortex b)	A29b (RSGb)	A29 (RSG)	27210	0.73244	1049.92	1899.13	2505.32	2195.4	856.043	3192.07	876.522	794.604	652.613	830.102
	2416	27220	2066	6	Cingulate cortex area 29b (Retrosplenial granular cortex b) layer1	A29b (RSGb)-1	A29b (RSGb)	27220	0.21096	1227.72	1327.27	2218.43	2536.03	1265.64	2607.13	1374.67	1161.36	801.1	1033.37
	2417	27230	2066	6	Cingulate cortex area 29b (Retrosplenial granular cortex b) layer2/3	A29b (RSGb)-2/3	A29b (RSGb)	27230	0.21432	1222.47	2533.59	3214.82	2468.27	1068.5	3457.45	653.229	760.545	578.574	914.52
	2418	27240	2066	6	Cingulate cortex area 29b (Retrosplenial granular cortex b) layer5	A29b (RSGb)-5	A29b (RSGb)	27240	0.23952	855.878	1995.66	2304.61	1970.61	505.177	3665.66	705.578	605.377	613.727	655.478
	2419	27250	2066	6	Cingulate cortex area 29b (Retrosplenial granular cortex b) layer6a	A29b (RSGb)-6a	A29b (RSGb)	27250	0.054	666.667	1481.48	2000	1074.07	166.667	2814.81	703.704	481.481	500	592.593
	2420	27260	2066	6	Cingulate cortex area 29b (Retrosplenial granular cortex b) layer6b	A29b (RSGb)-6b	A29b (RSGb)	27260	0.01364	513.196	733.138	1319.65	1026.39	73.3138	1246.33	366.569	219.941	806.452	366.569
	2067	27270	886	5	Cingulate cortex area 29a (Retrosplenial granular cortex a)	A29a (RSGa)	A29 (RSG)	27270	0.76452	749.49	1232.15	1933.24	1403.5	337.467	2260.24	651.389	494.428	519.28	695.861
	2421	27280	2067	6	Cingulate cortex area 29a (Retrosplenial granular cortex a) layer1	A29a (RSGa)-1	A29a (RSGa)	27280	0.14972	821.534	941.758	2037.14	1436.01	520.972	1783.33	915.041	1035.27	641.197	1048.62
	2422	27290	2067	6	Cingulate cortex area 29a (Retrosplenial granular cortex a) layer2/3	A29a (RSGa)-2/3	A29a (RSGa)	27290	0.21636	1058.42	1497.5	2167.68	1765.58	425.217	2047.51	411.351	508.412	342.023	605.472
	2423	27291	2067	6	Cingulate cortex area 29a (Retrosplenial granular cortex a) layer5	A29a (RSGa)-5	A29a (RSGa)	27291	0.3012	673.971	1311.42	1862.55	1231.74	232.404	2785.52	717.131	202.523	511.288	647.41
	2424	27292	2067	6	Cingulate cortex area 29a (Retrosplenial granular cortex a) layer6a	A29a (RSGa)-6a	A29a (RSGa)	27292	0.06716	134.008	893.389	1429.42	1250.74	208.457	1920.79	491.364	491.364	789.16	372.245
	2425	27293	2067	6	Cingulate cortex area 29a (Retrosplenial granular cortex a) layer6b	A29a (RSGa)-6b	A29a (RSGa)	27293	0.03008	299.202	731.383	1562.5	698.138	132.979	1662.23	764.628	631.649	664.894	797.872
	22	27300	315	4	parietal association cortex	PtA	Isocortex	27300	1.4418	2714.66	3422.8	4827.3	2957.41	1146.48	4284.23	699.126	1368.43	1170.76	2136.91
	2056	27910	22	4	Medial parietal association cortex	MPtA	PtA	27910	0.59264	2176.7	2924.2	4409.08	2558.05	779.563	4847.8	708.693	1356.64	1157.53	2337
	2381	27911	2056	6	Medial parietal association cortex layer 1	MPtA-1	MPtA	27911	0.08116	221.784	566.782	258.748	184.82	1158.21	2846.23	948.743	529.818	172.499	726.959
	2382	27912	2056	6	Medial parietal association cortex layer 2/3	MPtA-2	MPtA	27912	0.1588	2437.03	2311.08	2909.32	1939.55	843.829	5705.29	818.64	1536.52	755.668	2890.43
	2383	27913	2056	6	Medial parietal association cortex layer 4	MPtA-4	MPtA	27913	0.04768	3754.19	4802.85	7885.91	5180.37	1174.5	6270.97	671.141	2202.18	2034.4	3691.28
	2384	27914	2056	6	Medial parietal association cortex layer 5	MPtA-5	MPtA	27914	0.14164	2492.23	4313.75	6431.8	3487.72	458.91	5852.87	564.812	1517.93	1645.02	2336.91
	2385	27915	2056	6	Medial parietal association cortex layer 6a	MPtA-6a	MPtA	27915	0.11296	2124.65	3186.97	5497.52	2947.95	841.006	4160.76	601.983	1195.11	1620.04	2186.61
	2386	27916	2056	6	Medial parietal association cortex layer 6b	MPtA-6b	MPtA	27916	0.0504	2242.06	2380.95	4404.76	2361.11	357.143	2738.1	654.762	1230.16	773.81	2242.06
	2057	27920	22	4	Lateral parietal association cortex	LPtA	PtA	27920	0.6194	3136.91	3419.44	4788.51	3085.24	1322.25	4133.03	700.678	1391.67	1167.26	1980.95
	2387	27921	2057	6	Lateral parietal association cortex layer 1	LPtA-1	LPtA	27921	0.08708	287.092	861.277	689.022	264.125	1366.56	2434.54	1251.72	1194.3	654.571	815.342
	2388	27922	2057	6	Lateral parietal association cortex layer 2/3	LPtA-2/3	LPtA	27922	0.15676	3342.69	2653.74	2813.22	2404.95	1588.42	5332.99	752.743	1671.34	1027.05	2424.09
	2389	27923	2057	6	Lateral parietal association cortex layer 4	LPtA-4	LPtA	27923	0.11572	4796.06	5418.25	7630.49	5228.14	1849.29	6005.88	440.719	1443.14	1546.84	3102.32
	2390	27924	2057	6	Lateral parietal association cortex layer 5	LPtA-5	LPtA	27924	0.1206	3781.09	4925.37	6791.04	4195.69	1235.49	4427.86	472.637	1252.07	1393.03	1285.24
	2391	27925	2057	6	Lateral parietal association cortex layer 6a	LPtA-6a	LPtA	27925	0.1002	2894.21	3393.21	5948.1	3173.65	868.263	2005.99	718.563	1347.31	1177.64	1886.23
	2392	27926	2057	6	Lateral parietal association cortex layer 6b	LPtA-6b	LPtA	27926	0.03904	2382.17	1690.57	4277.66	2100.41	25.6148	2100.41	691.598	1101.43	1024.59	1869.88
	2082	27940	22	4	parietal cortex posterior area dorsal part	PtPD	PtA	27940	0.04512	2770.39	3634.75	5319.15	3479.61	1418.44	3989.36	953.014	1462.77	1196.81	2083.33
	2402	27941	2082	6	Parietal cortex posterior area dorsal part layer1	PtPD-1	PtPD	27941	0.00532	0	1503.76	1691.73	0	2255.64	2819.55	2067.67	1691.73	939.85	2067.67
	2403	27942	2082	6	Parietal cortex posterior area dorsal part layer2/3	PtPD-2/3	PtPD	27942	0.01168	4366.44	2739.73	3339.04	2825.34	2482.88	6335.62	770.548	1626.71	1027.4	1455.48
	2404	27943	2082	6	Parietal cortex posterior area dorsal part layer4	PtPD-4	PtPD	27943	0.01116	4032.26	5286.74	8064.52	4659.5	1344.09	5645.16	627.24	1971.33	1702.51	3763.44
	2405	27944	2082	6	Parietal cortex posterior area dorsal part layer5	PtPD-5	PtPD	27944	0.00816	1838.24	5147.06	7598.04	6004.9	490.196	1838.24	1225.49	857.843	612.745	857.843
	2406	27945	2082	6	Parietal cortex posterior area dorsal part layer6a	PtPD-6a	PtPD	27945	0.00628	955.414	3662.42	4936.31	2707.01	477.707	1114.65	636.943	1114.65	1114.65	1751.59
	2407	27946	2082	6	Parietal cortex posterior area dorsal part layer6b	PtPD-6b	PtPD	27946	0.00252	3174.6	0	3571.43	2380.95	396.825	2380.95	793.651	793.651	2380.95	2380.95
	541	28000	315	4	Temporal association cortex	TeA	Isocortex	28000	3.28808	923.031	1089.69	1423.32	1007.88	313.557	1339.08	478.699	1066.28	810.808	1147.17
	97	28100	541	6	Temporal association cortex layer1	TeA-1	TeA	28100	0.51104	749.452	645.742	765.106	618.347	504.853	1134.94	500.939	921.65	706.403	1232.78
	1127	28200	541	6	Temporal association cortex layer2/3	TeA-2/3	TeA	28200	0.76356	954.738	889.256	1341.09	1151.19	303.84	1115.83	327.414	1156.43	886.636	994.028
	234	28300	541	6	Temporal association cortex layer4	TeA-4	TeA	28300	0.53088	847.649	1058.62	1693.41	1052.97	258.062	934.298	307.037	981.389	657.399	702.607
	289	28400	541	6	Temporal association cortex layer5	TeA-5	TeA	28400	0.73872	1142.52	1560.81	1861.33	1059.94	330.301	1502.6	575.319	1114.09	901.559	1363.17
	729	28500	541	6	Temporal association cortex layer6a	TeA-6a	TeA	28500	0.57072	984.721	1289.6	1505.12	1149.43	248.809	2011.49	716.639	1189.73	905.873	1452.55
	786	28600	541	6	Temporal association cortex layer6b	TeA-6b	TeA	28600	0.15988	362.772	731.799	781.836	719.289	87.5657	1219.66	400.3	694.271	575.432	1038.28
	922	28700	315	4	Perihinal cortex	PRh	Isocortex	28700	2.89612	823.17	958.869	589.409	713.368	347.707	1278.61	526.221	1101.13	893.955	1130.82
	335	28800	922	6	Perihinal cortex layer6a	PRh-6a	PRh	28800	0.48196	879.741	1072.7	728.276	773.923	300.855	1114.2	649.431	1054.03	941.987	1365.26
	368	28900	922	6	Perihinal cortex layer6b	PRh-6b	PRh	28900	0.09412	626.859	594.985	552.486	541.861	74.3731	934.977	563.111	1423.71	1051.85	1338.72
	2286	28930	22	4	Parietal cortex posterior area rostral part	PtPR	PtA	28930	0.18464	3011.27	4982.67	6179.59	3682.84	1668.11	3054.59	601.17	1305.24	1218.59	2030.98
	2396	28931	2286	6	Parietal cortex posterior area rostral part layer1	PtPR-1	PtPR	28931	0.02376	715.488	2146.46	1515.15	547.138	1767.68	1809.76	1388.89	1809.76	1725.59	2272.73
	2397	28932	2286	6	Parietal cortex posterior area rostral part layer2/3	PtPR-2/3	PtPR	28932	0.0462	3311.69	4177.49	4177.49	2965.37	2619.05	4761.9	324.675	1385.28	822.511	1298.7
	2398	28933	2286	6	Parietal cortex posterior area rostral part layer4	PtPR-4	PtPR	28933	0.03912	4626.79	8461.15	9100.2	4933.54	2581.8	4677.91	306.748	1661.55	1789.37	3502.04
	2399	28934	2286	6	Parietal cortex posterior area rostral part layer5	PtPR-5	PtPR	28934	0.03636	3327.83	6298.13	8333.33	5418.04	797.58	1815.18	605.061	742.574	935.094	1842.68
	2400	28935	2286	6	Parietal cortex posterior area rostral part layer6a	PtPR-6a	PtPR	28935	0.02828	2545.97	3818.95	7072.14	3783.59	459.689	1166.9	954.738	1379.07	777.935	1449.79
	2401	28936	2286	6	Parietal cortex posterior area rostral part layer6b	PtPR-6b	PtPR	28936	0.01092	1098.9	732.601	4853.48	3021.98	183.15	1739.93	183.15	274.725	1831.5	1465.2
	540	29000	922	6	Perihinal cortex layer1	PRh-1	PRh	29000	0.5498	625.682	885.777	636.595	461.986	531.102	1365.95	683.885	842.124	749.363	811.204
	692	29100	922	6	Perihinal cortex layer5	PRh-5	PRh	29100	0.70676	802.253	923.935	496.633	512.197	149.98	727.262	373.536	882.902	618.315	990.435
	888	29200	922	6	Perihinal cortex layer2/3	PRh-2/3	PRh	29200	1.03564	950.137	1010.97	576.455	989.726	436.445	1698.47	493.415	1399.13	1139.39	1287.13
	895	29300	315	4	Ectorhinal cortex	Ect	Isocortex	29300	3.27728	867.183	1024.33	905.019	764.658	361.275	1276.06	566.934	1280.33	1043.55	1308.4
	836	29400	895	6	Ectorhinal cortex layer1	Ect-1	Ect	29400	0.52828	882.108	711.744	889.68	605.739	726.887	1283.41	624.669	982.434	825.32	916.181
	427	29500	895	6	Ectorhinal cortex layer2/3	Ect-2/3	Ect	29500	1.195	718.828	868.619	736.402	723.849	320.502	1153.97	498.745	1619.25	1216.74	1438.49
	988	29600	895	6	Ectorhinal cortex layer5	Ect-5	Ect	29600	0.71512	1149.46	1395.57	1107.51	763.508	264.291	1251.54	585.916	1199.8	1065.56	1391.37
	977	29700	895	6	Ectorhinal cortex layer6a	Ect-6a	Ect	29700	0.53404	1072.95	1417.5	1170.32	1168.45	333.308	1582.28	719.047	1273.31	1172.2	1621.6
	1045	29800	895	6	Ectorhinal cortex layer6b	Ect-6b	Ect	29800	0.13756	676.069	806.921	719.686	661.53	123.582	1366.68	479.791	1046.82	814.19	1250.36
	698	29900	695	3	Olfactory areas	OLF	CTXpl	29900	37.2049	519.878	946.677	400.969	408.253	248.543	947.429	527.055	687.195	817.662	783.634
	507	30000	698	4	Main olfactory bulb	MOB	OLF	30000	12.2392	170.191	305.576	57.9286	83.5839	35.2147	220.848	121.005	71.655	342.098	139.878
6?	212	30100	507	4	Glomerular layer of the olfactory bulb	Gl	MOB	30100	2.89772	202.573	539.044	95.5924	124.926	48.6589	208.095	91.4512	115.608	298.165	203.953
6?	220	30200	507	4	Granule cell layer of the olfactory bulb	GrO	MOB	30200	3.39696	139.242	65.6469	8.24266	21.4898	19.7235	116.575	140.42	25.0224	232.561	57.6986
6?	228	30300	507	4	Internal plxiform layer of the olfactory bulb	IPl	MOB	30300	0.863	174.971	276.941	19.6987	56.7787	22.0162	279.258	177.289	41.7149	555.041	137.891
6?	236	30400	507	4	Mitral cell layer of the olfactory bulb	Mi	MOB	30400	0.85452	194.261	444.694	55.0016	57.3421	17.5537	348.734	179.048	51.4909	525.441	140.43
6?	244	30500	507	4	External plexiform layer of the olfactory bulb	EPl	MOB	30500	4.227	167.022	316.063	80.4353	115.921	44.7126	275.609	102.437	89.1885	379.702	162.29
	151	30600	698	4	Accessory olfactory bulb	AOB	OLF	30600	0.56592	445.293	220.879	114.857	137.829	240.317	318.066	75.9825	113.09	189.073	351.64
6?	188	30700	151	4	Glomerular layer of the accessory olfactory bulb	GlA	AOB	30700	0.14716	618.375	380.538	319.38	360.152	197.064	618.375	129.111	258.222	448.491	747.486
6?	196	30800	151	4	Granule cell layer of the accessory olfactory bulb	GrA	AOB	30800	0.1306	91.8836	91.8836	0	0	0	15.3139	38.2848	0	22.9709	7.65697
6?	204	30900	151	4	Mitral cell layer of the accessory olfactory bulb	MiA	AOB	30900	0.11844	430.598	270.179	75.9878	50.6586	413.712	219.52	101.317	109.76	109.76	329.281
6?	2021	30910	151	4	External plexiform layer of the accessory olfactory b	EPIA	AOB	30910	0.16972	577.422	147.301	53.0285	111.949	341.739	359.416	41.2444	76.5967	147.301	288.711
	159	31000	698	4	Anterior olfactory area	AO	OLF	31000	3.4196	183.647	700.667	134.226	78.6642	24.5643	222.833	240.671	208.796	326.354	193.005
	167	31100	159	4	Anterior olfactory area dorsal part	AOD	AO	31100	0.34948	60.0893	277.555	20.0298	17.1684	0	28.6139	85.8418	42.9209	82.9804	42.9209
	175	31200	159	4	Anterior olfactory area external part	AOE	AO	31200	0.1708	52.6932	163.934	35.1288	11.7096	0	58.548	99.5316	76.1124	240.047	35.1288
	160	31250	159	4	Anterior olfactory area outer layer	AOOL	AO	31250	1.03932	327.137	491.668	138.552	77.9356	40.411	320.402	330.023	349.267	531.116	398.337
	183	31300	159	4	Anterior olfactory area lateral part	AOL	AO	31300	0.70944	46.5156	659.675	53.5634	33.8295	0	15.5052	101.488	76.1164	155.052	35.2391
	191	31400	159	4	Anterior olfactory area medial part	AOM	AO	31400	0.60168	174.511	756.216	182.821	108.031	26.5922	380.601	294.176	264.26	254.288	166.201
	199	31500	159	4	Anterior olfactory area posteroventral part	AOP/AOV	AO	31500	0.48556	170.937	1480.76	284.208	115.331	2.05948	232.721	288.327	189.472	385.122	131.807
	2318	31510	199	4	Anterior olfactory area ventral part	AOV	AOP/AOV	31510	0.1524	6.56168	354.331	39.3701	39.3701	0	242.782	223.097	59.0551	262.467	65.6168
	2319	31520	199	4	Anterior olfactory area posterior part	AOP	AOP/AOV	31520	0.33316	246.128	1996.04	396.206	150.078	3.00156	228.119	318.165	249.13	441.229	162.084
	589	31800	698	4	Taenia tecta	TT	OLF	31800	1.8174	263.563	1117.53	397.821	315.286	125.454	512.821	376.912	389.568	445.692	404.424
	597	31900	589	4	Dorsal tenia tecta	DTT	TT	31900	0.08292	84.4187	771.828	168.837	24.1196	24.1196	277.376	192.957	349.735	397.974	699.469
	1034	32100	589	6	Dorsal tenia tecta layer 1	DTT1	DTT	32100	0.3466	548.182	871.321	556.838	429.89	268.321	929.025	594.345	698.211	626.082	695.326
	1042	32200	589	6	Dorsal tenia tecta layer 2	DTT2	DTT	32200	0.18372	190.507	1055.95	489.876	337.47	70.7599	424.559	522.534	293.926	359.242	310.255
	1050	32300	589	6	Dorsal tenia tecta layer 3	DTT3	DTT	32300	0.45336	194.106	1471.24	370.566	258.073	92.6416	403.653	260.279	357.332	341.892	242.633
	1059	32400	589	6	Dorsal tenia tecta layer 4	DTT4	DTT	32400	0.0778	115.681	1066.84	526.992	179.949	12.8535	719.794	295.63	359.897	668.38	385.604
	605	32500	589	4	Ventral tenia tecta	VTT	TT	32500	0.01728	0	347.222	57.8704	231.481	0	578.704	173.611	115.741	289.352	289.352
	1067	32700	589	6	Ventral tenia tecta layer 1	VTT1	VTT	32700	0.32632	383.06	827.409	459.671	444.349	211.449	686.443	392.253	425.962	609.831	603.702
	1075	32800	589	6	Ventral tenia tecta layer 2	VTT2	VTT	32800	0.11536	78.0166	1621.01	121.359	286.061	26.0055	34.6741	173.37	60.6796	138.696	78.0166
	1082	32900	589	6	Ventral tenia tecta layer 3	VTT3	VTT	32900	0.21404	74.7524	1205.38	242.945	219.585	23.3601	149.505	350.402	210.241	313.026	130.817
	814	33000	698	4	Cingulate cortex area 25 (dorsal peduncular cortex)	A25 (DP)	OLF	33000	0.70756	118.718	609.136	186.557	142.744	53.7057	416.926	457.912	467.805	484.765	366.047
	496	33100	814	6	Cingulate cortex area 25 (dorsal peduncular cortex) layer1	A25 (DP)-1	A25 (DP)	33100	0.14864	329.656	376.749	201.83	248.924	168.192	524.758	598.762	787.137	544.941	672.766
	535	33200	814	6	Cingulate cortex area 25 (dorsal peduncular cortex) layer2	A25 (DP)-2	A25 (DP)	33200	0	#DIV/0!	#DIV/0!	#DIV/0!	#DIV/0!	#DIV/0!	#DIV/0!	#DIV/0!	#DIV/0!	#DIV/0!	#DIV/0!
	360	33300	814	6	Cingulate cortex area 25 (dorsal peduncular cortex) layer2/3	A25 (DP)-2/3	A25 (DP)	33300	0.15608	102.512	723.988	172.988	249.872	19.2209	506.151	730.395	506.151	550.999	378.011
	646	33400	814	6	Cingulate cortex area 25 (dorsal peduncular cortex) layer5	A25 (DP)-5	A25 (DP)	33400	0.30528	49.1352	717.374	203.092	55.6866	32.7568	232.573	317.741	255.503	353.774	170.335
	267	33500	814	6	Cingulate cortex area 25 (dorsal peduncular cortex) layer6a	A25 (DP)-6a	A25 (DP)	33500	0.09756	41.0004	440.754	133.251	82.0008	0	686.757	246.002	584.256	697.007	492.005
not a real thing?	2019	33510	814	4	Dorsal transition zone	DTr	A25 (DP)	33510	0	#DIV/0!	#DIV/0!	#DIV/0!	#DIV/0!	#DIV/0!	#DIV/0!	#DIV/0!	#DIV/0!	#DIV/0!	#DIV/0!
	961	33600	698	4	Piriform cortex	PIR	OLF	33600	13.1746	923.598	1713.99	811.033	841.774	516.07	1787.76	1013.54	1458.64	1495.15	1515.5
	276	33800	961	4	Piriform cortex 1	Pir1	PIR	33800	3.76928	644.42	925.906	351.791	486.565	523.973	1267.88	1009.21	1105.52	1166.54	981.62
	284	33900	961	4	Piriform cortex 2	Pir2	PIR	33900	2.18368	954.352	1325.74	738.203	472.139	257.822	2369.85	1733.31	2014.95	2260.4	1745.68
	291	34000	961	4	Piriform cortex 3	Pir3	PIR	34000	6.1752	1091.95	2398.46	1182.31	1255.34	668.318	1908.93	742.162	1485.78	1447.4	1759.3
	2024	34010	961	4	Cortex-amygdala transition zone	CxA	PIR	34010	1.0464	871.56	1323.59	426.223	452.026	128.058	1730.7	1128.63	1409.59	1363.72	1519.5
	2303	34020	2024	6	Cortex-amygdala transition zone Layer1	CxA1	CxA	34020	0.31492	904.992	689.064	57.1574	193.7	28.5787	1146.32	882.764	711.292	955.798	1244.76
	2304	34030	2024	6	Cortex-amygdala transition zone Layer2	CxA2	CxA	34030	0.19356	402.976	681.959	563.133	242.819	0	873.114	1374.25	1870.22	904.112	377.144
	2305	34040	2024	6	Cortex-amygdala transition zone Layer3	CxA3	CxA	34040	0.53792	1020.6	1925.94	593.025	678.54	232.377	2381.4	1184.19	1652.66	1767.92	2091.39
	619	34100	698	4	Nucleus of the lateral olfactory tract	LOT	OLF	34100	0.34776	1086.96	1719.58	497.47	350.817	77.6398	1923.74	868.415	925.926	1199.1	1273.87
	260	34300	619	6	Nucleus of the lateral olfactory tract 1	LOT1	LOT	34300	0.11464	1334.61	1133.98	78.5066	78.5066	8.72296	1151.43	872.296	750.174	1099.09	1395.67
	268	34400	619	6	Nucleus of the lateral olfactory tract 2	LOT2	LOT	34400	0.08588	558.919	1408.94	419.19	395.901	34.9325	1571.96	652.073	535.631	896.6	884.956
	1139	34500	619	6	Nucleus of the lateral olfactory tract 3	LOT3	LOT	34500	0.11588	1147.74	2614.77	1104.59	664.48	198.481	3072.14	854.332	1328.96	1328.96	1458.41
	631	34600	698	4	cortical amygdaloid nucleus	CO	OLF	34600	3.45628	694.678	637.969	334.753	327.23	223.362	1314.13	512.69	746.178	791.024	1095.69
	639	34700	631	4	Anterior cortical amygdaloid nucleus	ACo	CO	34700	0.77648	882.186	1123.02	312.951	254.997	39.9238	1787.55	786.884	1258.24	1183.55	1255.67
	192	34800	639	6	Anterior cortical amygdaloid nucleus layer1	ACo-1	ACo	34800	0.25048	906.26	790.482	47.908	31.9387	7.98467	1600.93	738.582	487.065	1281.54	1241.62
	200	34900	639	6	Anterior cortical amygdaloid nucleus layer2	ACo-2	ACo	34900	0.14536	330.215	908.09	371.491	275.179	6.87947	908.09	598.514	1430.93	660.429	605.394
	208	35000	639	6	Anterior cortical amygdaloid nucleus layer3	ACo-3	ACo	35000	0.38064	1077.13	1423.92	465.006	394.073	73.5603	2246.22	890.605	1699.77	1318.83	1513.24
	647	35100	631	4	Posterior cortical amygdaloid area	PCO	CO	35100	2.6798	640.346	497.425	341.07	348.16	276.513	1176.95	433.241	597.806	677.289	1049.33
	655	35200	647	5	Posterolateral cortical amygdaloid area	PLCo	PCO	35200	1.29976	603.188	532.406	210.039	266.972	213.116	1120.21	412.384	577.03	665.507	1004.8
	216	35500	655	6	Posterolateral cortical amygdaloid area 1	PLCo1	PLCo	35500	0.42236	752.912	433.28	11.8382	61.5589	82.8677	1314.04	475.897	440.383	648.736	1243.02
	224	35600	655	6	Posterolateral cortical amygdaloid area 2	PLCo2	PLCo	35600	0.24436	372.401	605.664	106.4	212.801	106.4	556.556	229.17	466.525	486.986	417.417
	232	35700	655	6	Posterolateral cortical amygdaloid area 3	PLCo3	PLCo	35700	0.63304	592.38	570.264	382.282	424.934	341.211	1208.45	440.73	710.856	745.608	1072.6
	663	35800	647	5	Posteromedial cortical amygdaloid area	PMCo	PCO	35800	1.38004	675.343	464.479	464.479	424.625	336.222	1230.4	452.885	617.373	688.386	1091.27
	240	36100	663	6	Posteromedial cortical amygdaloid area 1	PMCo1	PMCo	36100	0.36064	801.353	546.251	407.609	374.335	199.645	1078.64	440.883	640.528	981.588	1203.42
	248	36200	663	6	Posteromedial cortical amygdaloid area 2	PMCo2	PMCo	36200	0.25852	692.403	421.631	394.554	348.136	444.84	990.252	293.981	560.885	340.399	762.03
	256	36300	663	6	Posteromedial cortical amygdaloid area 3	PMCo3	PMCo	36300	0.62636	633.821	450.22	590.715	525.257	376.78	1388.98	478.958	651.383	684.91	1135.13
	788	36400	698	4	Rostral amygdalopiriform area	RAPir	OLF	36400	0.684	483.918	637.427	387.427	323.099	333.333	1010.23	532.164	394.737	584.795	912.281
	408	36600	788	4	Rostral amygdalopiriform area 1	RAPir1	RAPir	36600	0.1978	596.562	733.064	0	0	75.8342	1319.51	738.119	222.447	606.673	1375.13
	416	36700	788	4	Rostral amygdalopiriform area 2	RAPir2	RAPir	36700	0.12224	269.961	891.688	40.9031	73.6257	188.154	613.547	286.322	548.102	458.115	171.793
	424	36800	788	4	Rostral amygdalopiriform area 3	RAPir3	RAPir	36800	0.36396	494.56	500.055	714.364	582.482	522.035	975.382	502.803	436.861	615.452	909.441
	566	36900	698	4	Amygdalopiriform transition area	Apir	OLF	36900	0.71588	731.966	819.97	730.569	785.048	690.06	1206.91	613.231	646.756	775.27	1022.52
	1140	37100	566	6	Postpiriform transition area layers 1	APir1	Apir	37100	0.11028	906.783	1496.19	99.7461	108.814	389.917	1577.8	671.019	1586.87	1305.77	1532.46
	1141	37200	566	6	Postpiriform transition area layers 2	APir2	Apir	37200	0.06576	182.482	349.757	349.757	425.791	501.825	410.584	121.655	288.929	395.377	273.723
	1142	37300	566	6	Postpiriform transition area layers 3	APir3	Apir	37300	0.4718	805.426	779.992	936.838	1061.89	849.936	1125.48	515.049	442.984	584.994	1000.42
things get wonky here, level 4 and 5 are similar to 3 and 4 above	1089	37400	695	3	Hippocampal formation	HPF	CTXpl	37400	42.0257	351.357	411.415	612.483	464.668	186.862	1180.42	540.217	418.934	599.062	655.123
	1080	37500	1089	4	Hippocampal region	HIP	HPF	37500	23.4979	357.308	414.803	571.114	474.893	150.524	872.375	420.676	327.603	463.999	487.15
	375	37600	1080	4	Ammon's horn	CA	HIP	37600	16.5203	296	386.918	560.765	456.59	109.804	880.554	390.974	261.739	433.165	436.494
	382	37700	375	5	Field CA1 of the hippocampus	CA1	CA	37700	8.84636	213.421	288.932	513.205	398.469	103.319	954.291	480.989	238.855	472.737	451.372
	391	37800	382	6	Field CA1 of the hippocampus- lacunosum moleculare layer of the hippocampus	CA1_LMol	CA1	37800	2.12292	130.952	197.841	394.739	325.024	159.215	618.959	466.339	306.182	385.789	410.284
	399	37900	382	6	Field CA1 of the hippocampus- oriens layer of the hippocampus	CA1_Or	CA1	37900	2.04284	427.346	647.138	880.637	543.851	94.4763	1454.84	504.2	241.331	783.223	537.977
	407	38000	382	6	Field CA1 of the hippocampus- pyramidal layer of the hippocampus	CA1_Py	CA1	38000	0.91096	385.308	424.827	481.909	681.698	108.677	1387.55	784.886	313.955	838.676	776.104
	415	38100	382	6	Field CA1 of the hippocampus- radiatum layer of the hippocampus	CA1_Rad	CA1	38100	3.76964	102.397	113.273	388.366	292.601	75.3388	767.182	403.222	181.45	265.012	349.105
	423	38200	375	5	Field CA2 of the hippocampus	CA2	CA	38200	1.354	149.188	220.089	358.198	391.433	63.5155	494.092	215.657	110.044	255.539	144.756
	431	38300	423	6	Field CA2 of the hippocampus- lacunosum moleculare layer of the hippocampus	CA2_LMol	CA2	38300	0.35808	41.8901	64.2315	189.902	94.9508	69.8168	125.67	148.012	120.085	117.292	89.3655
	438	38400	423	6	Field CA2 of the hippocampus- oriens layer of the hippocampus	CA2_Or	CA2	38400	0.37412	400.941	537.261	636.16	791.19	53.4588	871.378	315.407	80.1882	467.764	176.414
	446	38500	423	6	Field CA2 of the hippocampus- pyramidal layer of the hippocampus	CA2_Py	CA2	38500	0.19168	125.209	245.2	297.371	584.307	46.9533	626.043	245.2	93.9065	323.456	224.332
	454	38600	423	6	Field CA2 of the hippocampus- radiatum layer of the hippocampus	CA2_Rad	CA2	38600	0.43012	30.2241	62.7732	283.642	204.594	74.3978	413.838	172.045	134.846	155.77	127.871
	463	38700	375	5	Field CA3 of the hippocampus	CA3	CA	38700	6.31992	443.044	559.817	670.736	551.906	128.799	860.137	302.535	326.27	415.828	478.171
	471	38800	463	6	Field CA3 of the hippocampus- lacunosum moleculare layer of the hippocampus	CA3_LMol	CA3	38800	0.1986	75.5287	146.022	533.736	302.115	140.987	427.996	156.093	95.6697	146.022	171.198
	479	38900	463	6	Field CA3 of the hippocampus- stratum lucidum of the hippocampus	SLu	CA3	38900	0.379	253.298	437.995	532.982	364.116	50.1319	530.343	92.3483	118.734	184.697	174.142
	486	39000	463	6	Field CA3 of the hippocampus- oriens layer of the hippocampus	CA3_Or	CA3	39000	2.92116	572.718	655.561	759.63	670.282	156.445	1054.72	422.435	499.117	574.772	640.841
	495	39100	463	6	Field CA3 of the hippocampus- pyramidal layer of the hippocampus	CA3_Py	CA3	39100	1.36608	497.043	623.682	684.44	598.062	141.28	1010.92	292.809	270.116	453.121	551.944
	504	39200	463	6	Field CA3 of the hippocampus- radiatum layer of the hippocampus	CA3_Rad	CA3	39200	1.45508	231.602	395.855	533.991	353.932	80.408	472.826	145.696	117.519	158.754	203.425
	726	39300	1080	4	Dentate gyrus	DG	HIP	39300	6.92332	504.816	480.694	593.646	517.671	245.98	851.759	491.238	480.116	537.314	605.057
	10703	39400	726	6	Molecular layer of the dentate gyrus	MoDG	DG	39400	4.30776	416.458	428.065	643.722	491.207	291.335	800.416	469.153	487.028	464.046	578.723
	10704	39500	726	6	Polymorph layer of the dentate gyrus	PoDG	DG	39500	0.89792	758.419	449.929	474.43	644.824	126.96	1069.14	467.748	389.79	572.434	658.188
	632	39600	726	6	Granule cell layer of the dentate gyrus	GrDG	DG	39600	1.5918	544.038	594.296	526.448	501.947	170.876	782.133	529.589	430.33	606.232	550.949
	982	41000	1080	4	Fasciola cinereum	FC	HIP	41000	0.02612	421.133	842.266	1722.82	1110.26	765.697	1569.68	689.127	1531.39	727.412	1186.83
	19	41100	1080	4	Induseum griseum	IG	HIP	41100	0.0282	0	177.305	35.461	106.383	0	496.454	248.227	354.61	283.688	567.376
	822	41200	1089	4	Retrohippocampal region	RHP	HPF	41200	18.5278	343.808	407.119	664.948	451.701	232.948	1571.1	691.827	534.765	770.358	868.157
	909	41300	822	4	Entorhinal area	ENT	RHP	41300	10.6741	450.25	438.164	662.727	533.067	271.311	1736.17	753.32	599.396	892.63	941.814
	918	41350	909	5	Dorsolateral entorhinal cortex	DLEnt	ENT	41350	3.6304	591.946	532.173	806.247	641.803	296.386	1587.98	674.306	742.893	891.913	990.8
	1121	41400	918	6	Dorsolateral entorhinal cortex layer 1	DLEnt1	DLEnt	41400	0.62872	461.255	706.197	968.635	650.528	760.275	1391.72	744.37	725.283	757.094	823.896
	20	41500	918	6	Dorsolateral entorhinal cortex layer 2	DLEnt2	DLEnt	41500	0.52212	432.851	367.732	340.918	302.612	189.612	2363.44	589.903	653.107	1189.38	888.685
	999	41600	918	6	Dorsolateral entorhinal cortex layer 2/3	DLEnt2/3	DLEnt	41600	0.42488	1256.83	819.055	1522.78	1520.43	247.129	2398.32	724.911	1435.7	1534.55	1741.67
	715	41700	918	6	Dorsolateral entorhinal cortex layer 2a	DLEnta	DLEnt	41700	0	#DIV/0!	#DIV/0!	#DIV/0!	#DIV/0!	#DIV/0!	#DIV/0!	#DIV/0!	#DIV/0!	#DIV/0!	#DIV/0!
	764	41800	918	6	Dorsolateral entorhinal cortex layer 2b	DLEntb	DLEnt	41800	0	#DIV/0!	#DIV/0!	#DIV/0!	#DIV/0!	#DIV/0!	#DIV/0!	#DIV/0!	#DIV/0!	#DIV/0!	#DIV/0!
	52	41900	918	6	Dorsolateral entorhinal cortex layer 3	DLEnt3	DLEnt	41900	0.71624	435.608	333.687	735.787	487.267	208.031	1605.61	713.448	727.41	765.107	1006.65
	92	42000	918	6	Dorsolateral entorhinal cortex layer 4	DLEnt4	DLEnt	42000	0	#DIV/0!	#DIV/0!	#DIV/0!	#DIV/0!	#DIV/0!	#DIV/0!	#DIV/0!	#DIV/0!	#DIV/0!	#DIV/0!
	312	42100	918	6	Dorsolateral entorhinal cortex layer 4/5	DLEnt4/5	DLEnt	42100	0	#DIV/0!	#DIV/0!	#DIV/0!	#DIV/0!	#DIV/0!	#DIV/0!	#DIV/0!	#DIV/0!	#DIV/0!	#DIV/0!
	139	42200	918	6	Dorsolateral entorhinal cortex layer 5	DLEnt5	DLEnt	42200	0.89132	582.282	545.259	695.598	535.161	135.754	1156.71	655.208	578.917	693.354	873.985
	387	42300	918	6	Dorsolateral entorhinal cortex layer 5/6	DLEnt5/6	DLEnt	42300	0	#DIV/0!	#DIV/0!	#DIV/0!	#DIV/0!	#DIV/0!	#DIV/0!	#DIV/0!	#DIV/0!	#DIV/0!	#DIV/0!
	28	42400	918	6	Dorsolateral entorhinal cortex layer 6a	DLEnt6a	DLEnt	42400	0.37576	636.044	558.867	742.495	577.496	226.208	997.977	644.028	574.835	721.205	856.93
	60	42500	918	6	Dorsolateral entorhinal cortex layer 6b	DLEnt6b	DLEnt	42500	0.0634	347.003	189.274	630.915	520.505	157.729	993.691	378.549	567.823	646.688	788.644
	926	42700	909	5	Dorsal intermediate entorhinal cortex	DIEnt	ENT	42700	1.41464	759.204	646.808	1081.55	1034.89	538.653	1285.84	537.239	634.084	892.1	928.151
	526	42800	926	6	Dorsal intermediate entorhinal cortex layer 1	DIEnt1	DIEnt	42800	0.22844	669.76	1186.31	354.579	302.049	963.054	1339.52	490.282	928.034	1107.51	1002.45
	543	42900	926	6	Dorsal intermediate entorhinal cortex layer 2	DIEnt2	DIEnt	42900	0.26944	794.24	363.717	634.65	771.971	415.677	1428.89	482.482	727.435	938.985	1020.64
	468	43000	926	6	Dorsal intermediate entorhinal cortex layer 2a	DIEnt2a	DIEnt	43000	0	#DIV/0!	#DIV/0!	#DIV/0!	#DIV/0!	#DIV/0!	#DIV/0!	#DIV/0!	#DIV/0!	#DIV/0!	#DIV/0!
	508	43100	926	6	Dorsal intermediate entorhinal cortex layer 2b	DIEnt2b	DIEnt	43100	0	#DIV/0!	#DIV/0!	#DIV/0!	#DIV/0!	#DIV/0!	#DIV/0!	#DIV/0!	#DIV/0!	#DIV/0!	#DIV/0!
	2408	43110	926	6	Dorsal intermediate entorhinal cortex layer 2/3	DIEnt2/3	DIEnt	43110	0	#DIV/0!	#DIV/0!	#DIV/0!	#DIV/0!	#DIV/0!	#DIV/0!	#DIV/0!	#DIV/0!	#DIV/0!	#DIV/0!
	664	43200	926	6	Dorsal intermediate entorhinal cortex layer 3	DIEnt3	DIEnt	43200	0.42136	847.257	780.805	1255.46	1122.56	676.381	1298.18	564.838	628.916	970.666	1015.76
	712	43300	926	6	Dorsal intermediate entorhinal cortex layer 4	DIEnt4	DIEnt	43300	0	#DIV/0!	#DIV/0!	#DIV/0!	#DIV/0!	#DIV/0!	#DIV/0!	#DIV/0!	#DIV/0!	#DIV/0!	#DIV/0!
	727	43400	926	6	Dorsal intermediate entorhinal cortex layer 5	DIEnt5	DIEnt	43400	0.43092	735.635	429.314	1605.87	1513.04	317.924	1116.22	547.665	450.2	656.734	724.032
	550	43500	926	6	Dorsal intermediate entorhinal cortex layer 5/6	DIEnt5/6	DIEnt	43500	0	#DIV/0!	#DIV/0!	#DIV/0!	#DIV/0!	#DIV/0!	#DIV/0!	#DIV/0!	#DIV/0!	#DIV/0!	#DIV/0!
	743	43600	926	6	Dorsal intermediate entorhinal cortex layer 6	DIEnt6	DIEnt	43600	0.06448	511.787	496.278	883.995	961.538	124.069	1550.87	682.382	465.261	992.556	1070.1
	934	43700	909	5	Ventral intermediate entorhinal cortex	VIEnt	ENT	43700	0.9976	563.352	480.152	557.338	569.366	311.748	1679.03	871.091	676.624	1086.61	1234.96
	259	43800	934	6	Ventral intermediate entorhinal cortex layer 1	VIEnt1	VIEnt	43800	0.21744	657.653	584.069	45.9897	32.1928	308.131	1356.7	354.121	418.506	938.19	1177.34
	324	43900	934	6	Ventral intermediate entorhinal cortex layer 2	VIEnt2	VIEnt	43900	0.22568	412.088	301.312	465.261	664.658	230.415	1391.35	646.934	957.107	1041.3	934.952
	371	44000	934	6	Ventral intermediate entorhinal cortex layer 3	VIEnt3	VIEnt	44000	0.24388	598.655	557.651	660.161	615.057	336.231	2078.89	1459.73	979.99	1611.45	1726.26
	419	44100	934	6	Ventral intermediate entorhinal cortex layer 4	VIEnt4	VIEnt	44100	0	#DIV/0!	#DIV/0!	#DIV/0!	#DIV/0!	#DIV/0!	#DIV/0!	#DIV/0!	#DIV/0!	#DIV/0!	#DIV/0!
	1133	44200	934	6	Ventral intermediate entorhinal cortex layer 5/6	VIEnt5/6	VIEnt	44200	0.3106	579.524	476.497	901.481	840.309	354.153	1799.74	933.677	415.325	811.333	1107.53
	2159	44220	909	5	Medial entorhinal cortex	MEnt	ENT	44220	1.43856	360.082	447.67	629.796	404.571	198.115	2029.81	1187.99	668.029	1270.72	1267.24
	2164	44230	2159	6	Medial entorhinal cortex layer 1	MEnt1	MEnt	44230	0.12176	361.367	427.07	344.941	451.708	303.876	1585.09	550.263	451.708	763.798	780.223
	2444	44240	2159	6	Medial entorhinal cortex layer 2	MEnt2	MEnt	44240	0.15692	267.652	305.888	280.398	465.205	95.5901	3160.85	1064.24	822.075	1491.21	1516.7
	2445	44250	2159	6	Medial entorhinal cortex layer 3	MEnt3	MEnt	44250	0.30988	384.02	593.778	577.643	322.706	180.715	2429.97	1552.21	651.865	1578.03	1355.36
	2446	44260	2159	6	Medial entorhinal cortex layer 5	MEnt5	MEnt	44260	0.17212	348.594	488.032	1150.36	482.222	197.537	1318.85	1005.11	441.552	1074.83	842.436
	2447	44270	2159	6	Medial entorhinal cortex layer 6	MEnt6	MEnt	44270	0.1272	235.849	338.05	644.654	322.327	149.371	888.365	849.057	298.742	526.73	699.686
	2161	44280	909	5	Caudomedial entothinal cortex	CEnt	ENT	44280	3.19288	157.538	221.43	361.742	233.645	144.697	1989.74	706.259	365.814	662.725	653.955
	2448	44290	2161	6	Caudomedial entothinal cortex layer 1	CEnt1	CEnt	44290	0.69036	152.095	217.278	501.188	285.358	260.734	1675.94	906.773	495.394	885.045	750.333
	2449	44291	2161	6	Caudomedial entothinal cortex layer 2	CEnt2	CEnt	44291	0.78064	126.819	221.613	275.415	199.836	121.695	2177.7	782.691	361.242	654.591	602.07
	2450	44292	2161	6	Caudomedial entothinal cortex layer 3	CEnt3	CEnt	44292	0.85632	147.141	210.202	272.095	185.678	89.9197	2314.56	583.894	355.007	630.605	548.86
	2451	44293	2161	6	Caudomedial entothinal cortex layer 5	CEnt5	CEnt	44293	0.4638	206.986	209.142	321.259	256.576	90.5563	1729.19	429.064	252.264	383.786	418.284
	2452	44294	2161	6	Caudomedial entothinal cortex layer 6	CEnt6	CEnt	44294	0.0584	68.4932	359.589	342.466	359.589	34.2466	1130.14	530.822	222.603	599.315	479.452
	843	44300	822	4	Parasubiculum	PaS	RHP	44300	1.30356	188.714	302.249	506.306	220.933	274.633	1022.58	431.127	353.647	398.14	510.141
	10693	44400	843	6	Parasubiculum layer 1	PaS1	PaS	44400	0.3246	326.556	486.753	606.901	326.556	372.766	1050.52	807.147	471.349	693.161	936.537
	10694	44500	843	6	Parasubiculum layer 2	PaS2	PaS	44500	0.74528	140.887	257.621	469.622	206.634	221.393	1098.92	354.229	328.736	331.419	403.875
	10695	44600	843	6	Parasubiculum layer 3	PaS3	PaS	44600	0.19356	92.9944	113.66	299.649	67.1626	242.819	650.961	165.323	289.316	242.819	289.316
	1037	44700	822	4	Postsubiculum	Post	RHP	44700	1.15092	159.003	548.257	1010.5	380.565	211.135	1106.94	413.582	365.794	379.696	328.433
	10696	44800	1037	6	Postsubiculum layer 1	Post1	Post	44800	0.29304	331.013	781.463	1470.79	685.913	610.838	1839.34	907.726	897.488	798.526	829.238
	10697	44900	1037	6	Postsubiculum layer 2	Post2	Post	44900	0.5708	101.612	511.563	988.087	259.285	89.3483	753.329	213.735	131.395	164.681	115.627
	10698	45000	1037	6	Postsubiculum layer 3	Post3	Post	45000	0.28708	97.5338	383.168	585.203	310.018	45.2835	1062.42	306.535	289.118	379.685	240.351
	1084	45190	822	4	Presubiculum	PsS	RHP	45190	0.58384	217.525	424.774	945.465	546.383	488.147	827.281	618.32	455.604	515.552	524.116
	10699	45200	1084	6	Presubiculum layer 1	PsS1	PRE	45200	0.14672	763.359	865.594	1799.35	1458.56	1683.48	981.461	1076.88	1274.54	1383.59	1410.85
	10700	45300	1084	6	Presubiculum layer 2	PsS2	PRE	45300	0.31728	47.2769	349.849	746.974	327.786	116.616	810.01	485.376	163.893	236.384	252.143
	10701	45400	1084	6	Presubiculum layer 3	PsS3	PRE	45400	0.11984	0	83.4446	425.567	8.34446	8.34446	684.246	408.879	225.3	191.923	158.545
	502	45500	822	4	Subiculum	SUB	RHP	45500	4.81536	209.33	330.816	596.217	339.331	110.895	1554.82	701.505	490.514	724.349	972.513
	509	45600	502	5	Dorsal subiculum	DS	SUB	45600	1.29672	64.0077	163.489	301.53	143.439	40.1012	714.881	455.765	188.167	366.309	310.784
	829	45700	509	6	Dorsal subiculum molecular layer	DS-m	DS	45700	0.0638	109.718	297.806	579.937	219.436	329.154	423.197	595.611	344.828	673.981	564.263
	845	45800	509	6	Dorsal subiculum pyramidal layer	DS-sp	DS	45800	0.32268	49.5847	136.358	297.508	83.6742	3.09905	904.921	666.295	226.23	430.767	387.381
	837	45900	509	6	Dorsal subiculum stratum radiatum	DS-sr	DS	45900	0.09752	0	61.5258	102.543	41.0172	0	276.866	522.97	194.832	369.155	174.323
	518	46000	502	5	Ventral subiculum	VeS	SUB	46000	1.083	614.958	496.768	750.693	771.006	203.139	2894.74	1331.49	913.204	1578.95	2020.31
	853	46100	518	6	Ventral subiculum molecular layer	VeS-m	VeS	46100	0.08728	68.7443	91.659	492.667	824.931	68.7443	2268.56	458.295	412.466	561.412	630.156
	870	46200	518	6	Ventral subiculum pyramidal layer	VeS-sp	VeS	46200	0.27976	396.769	446.812	897.198	811.41	303.832	3184.87	1422.65	1143.84	1747.93	2259.08
	861	46300	518	6	Ventral subiculum stratum radiatum	VeS-sr	VeS	46300	0.11128	143.781	125.809	754.853	1051.4	143.781	3558.59	1671.46	745.866	1006.47	2534.15
	2440	46310	502	5	Subiculum transition area	STr	SUB	46310	2.39132	106.217	345.416	667.832	247.144	106.636	1410.94	548.233	461.67	537.778	870.649
	2441	46320	2440	6	Subiculum transition area molecular layer	STr-m	STr	46320	0.3678	24.4698	119.63	326.264	106.036	78.8472	505.71	342.577	339.859	413.268	630.778
	2442	46330	2440	6	Subiculum transition area pyramidal layer	STr-sp	STr	46330	1.69652	134.982	445.618	769.222	284.111	121.425	1635.11	573.527	481.574	567.043	885.931
	2443	46340	2440	6	Subiculum transition area stratum radiatum	STr-sr	STr	46340	0.327	48.9297	79.5107	525.994	214.067	61.1621	1266.06	648.318	495.413	525.994	1061.16
	703	46400	688	2	Cortical subplate	CTXsp	CTX	46400	9.4596	701.298	1032.92	862.087	617.468	266.185	1146.88	589.243	963.466	889.89	1192.76
	16	46500	703	3	Layer 6b isocortex	6b	CTXsp	46500	0	#DIV/0!	#DIV/0!	#DIV/0!	#DIV/0!	#DIV/0!	#DIV/0!	#DIV/0!	#DIV/0!	#DIV/0!	#DIV/0!
	583	46600	703	3	Claustrum	Cl	CTXsp	46600	0.81	1248.15	1762.96	788.889	641.975	141.975	1333.33	775.309	1287.65	1292.59	1167.9
	2002	46610	583	4	Dorsal claustrum	DCl	Cl	46610	0.22824	1069.05	1612.34	1161.06	977.042	197.161	1647.39	736.067	1266.21	1069.05	1270.59
	2003	46620	583	4	Ventral claustrum	VCl	Cl	46620	0.35368	1730.38	2278.9	870.844	650.305	183.782	1586.18	1015.04	1741.69	1758.65	1523.98
	942	46700	703	3	Endopiriform nucleus	En	CTXsp	46700	3.42052	494.662	1169.41	755.733	553.425	141.791	680.014	318.957	788.184	635.576	777.952
	952	46800	942	4	Dorsal endopiriform nucleus	DEn	En	46800	2.31928	566.986	1159.41	711.428	541.116	128.919	665.724	285.433	754.113	614.415	778.69
	966	46900	942	4	Ventral endopiriform nucleus	VEn	En	46900	0.40064	479.233	596.546	594.05	501.697	217.153	1103.23	381.889	1120.71	831.17	1360.32
	2085	46910	942	4	Intermediate endopiriform claustrum	IEn	En	46910	0.67548	254.634	1557.41	972.642	543.317	118.434	441.168	383.431	710.606	602.534	424.883
	2426	46920	942	4	Retroendopiriform nucleus	REn	En	46920	0.02512	517.516	796.178	1592.36	2786.62	756.369	1671.97	676.752	716.561	358.28	915.605
	131	47000	703	3	Lateral amygdaloid nucleus	La	CTXsp	47000	0.76148	946.84	854.914	353.259	462.258	229.816	992.803	371.645	950.78	706.519	1037.45
	2068	47010	131	4	Lateral amygdaloid nucleus dorsolateral part	LaDL	La	47010	0.41288	1286.09	925.208	336.66	440.806	293.063	1031.78	331.816	905.832	712.071	983.337
	2052	47020	131	4	Lateral amygdaloid nucleus ventrolateral part	LaVL	La	47020	0.16652	324.285	372.328	294.259	360.317	132.116	618.544	258.227	948.835	612.539	1231.08
	2060	47030	131	4	Lateral amygdaloid nucleus ventromedial part	LaVM	La	47030	0.17212	766.907	1161.98	453.172	633.279	180.107	1289.8	557.75	1092.26	813.386	993.493
	295	47100	703	3	Basolateral amygdalar nucleus	BL	CTXsp	47100	1.84388	667.614	972.406	898.106	669.241	344.925	1052.67	613.923	679.003	775.539	1164.93
	303	47200	295	4	Basolateral amygdaloid nucleus anterior part	BLA	BL	47200	0.66396	1046.75	1323.87	909.693	572.324	308.754	893.126	432.255	602.446	629.556	1146.15
	311	47300	295	4	Basolateral amygdaloid nucleus posterior part	BLP	BL	47300	0.93236	469.776	855.893	874.126	838.732	415.076	1269.9	796.902	804.41	919.173	1239.86
	451	47400	295	4	Basolateral amygdaloid nucleus ventral part	BLV	BL	47400	0.24756	395.864	468.573	957.344	290.839	177.735	662.466	412.021	412.021	626.111	933.107
	319	47500	703	3	Basomedial amygdalar nucleus	BM	CTXsp	47500	1.23544	758.434	887.943	1150.2	597.358	433.854	1630.19	967.267	1612.38	1441.59	2049.47
	327	47600	319	4	Basomedial amygdaloid nucleus anterior part	BMA	BM	47600	0.5586	957.752	1120.66	1423.2	694.594	553.169	1990.69	1054.42	1978.16	1675.62	2493.73
	334	47700	319	4	Basomedial amygdaloid nucleus posterior part	BMP	BM	47700	0.67684	593.937	695.881	924.886	517.109	335.382	1332.66	895.337	1310.5	1248.45	1682.82
	780	47800	703	3	Amygdalohippocampal area	AHi	CTXsp	47800	1.05688	736.129	572.44	1174.21	810.877	430.512	2064.57	921.581	1032.28	1060.67	1607.56
	2086	47810	780	4	Amygdalohippocampal area anterolateral part	AHiAL	AHi	47810	0.59196	897.02	587.878	1135.21	734.847	471.316	1937.63	812.555	1054.13	1076.09	1503.48
	2087	47820	780	4	Amygdalohippocampal area posteromedial part	AHiPM	AHi	47820	0.4058	495.318	537.21	1301.13	998.029	374.569	2353.38	1059.64	963.529	1027.6	1791.52
	2088	47830	780	4	Amygdalohippocampal area posterolateral	AHiPL	AHi	47830	0.05912	778.078	659.675	693.505	287.551	405.954	1353.18	1065.63	1285.52	1133.29	1387.01
	623	47900	567	1	Cerebral nuclei	CNU	CH	47900	54.454	357.898	525.049	438.682	281.742	112.958	725.971	440.776	582.4	580.123	579.296
	477	48000	623	2	Striatum	STR	CNU	48000	44.5232	330.075	475.864	362.216	223.614	90.5371	592.635	379.914	510.139	498.122	487.386
	485	48100	477	3	Striatum dorsal region	STRd	STR	48100	25.9973	138.591	177.019	238.833	110.242	39.1579	285.761	245.91	289.684	274.067	209.407
	672	48200	485	4	Caudate Putamen	CP	STRd	48200	25.9973	138.591	177.019	238.833	110.242	39.1579	285.761	245.91	289.684	274.067	209.407
	2376	48210	672	5	Caudoputamen- rostral extreme	CPre	CP	48210	0.92276	307.772	176.644	66.106	47.683	21.6741	317.526	146.3	209.155	430.231	174.477
	2491	48220	672	5	Caudoputamen- rostral	CPr	CP	48220	4.40896	215.017	132.231	88.683	58.744	19.2789	248.812	185.758	279.204	269.451	160.355
	2294	48221	2491	6	Caudoputamen- rostral medial	CPr, m	CPr	48221	0.55012	879.808	99.9782	85.4359	56.3513	21.8134	216.316	96.3426	209.045	216.316	67.2581
	2295	48222	2491	6	Caudoputamen- rostral intermediate dorsal	CPr, imd	CPr	48222	0.79924	35.0333	20.019	26.275	13.7631	5.00475	161.403	97.5927	195.185	173.915	80.0761
	2296	48223	2491	6	Caudoputamen- rostral intermediate ventral	CPr, imv	CPr	48223	0.84596	322.71	55.5582	62.6507	24.8239	13.003	144.215	111.116	145.397	176.131	50.8298
	2497	48224	2491	6	Caudoputamen- rostral lateral	CPr, l	CPr	48224	2.21364	73.6344	210.061	121.971	88.5419	26.2012	328.418	268.336	378.11	352.813	254.332
	2395	48225	2497	6	Caudoputamen- rostral lateral lateral strip	CPr, l, ls	CPr, l	48225	1.3178	50.0835	127.485	60.7072	62.2249	22.7652	292.154	207.922	303.536	263.318	211.716
	2297	48226	2497	6	Caudoputamen- rostral lateral ventromedial	CPr, l, vm	CPr, l	48226	0.89584	108.278	331.532	212.091	127.255	31.2556	381.765	357.207	487.81	484.462	317.021
	2492	48230	672	5	Caudoputamen- intermediate	CPi	CP	48230	12.1958	74.8618	125.207	144.23	70.5981	21.8108	247.872	225.323	251.48	237.459	122.091
	2498	48231	2492	6	Caudoputamen- intermediate dorsomedial	CPi, dm	CPi	48231	3.38852	125.128	78.2052	109.782	36.299	11.2143	180.61	174.412	189.758	190.349	90.6
	2299	48232	2498	6	Caudoputamen- intermediate dorsomedial dorsolateral	CPi, dm, dl	Cpi, dm	48232	0.86792	11.5218	55.3046	183.197	24.1958	4.60872	96.7831	156.696	191.262	216.61	28.8045
	2298	48233	2498	6	Caudoputamen- intermediate dorsomedial intermedial	CPi, dm, im	Cpi, dm	48233	0.8002	242.439	181.205	107.473	66.2334	21.2447	367.408	218.695	158.71	178.705	236.191
	2374	48234	2498	6	Caudoputamen- intermediate dorsomedial central dorsal	CPi, dm, cd	Cpi, dm	48234	0.78352	11.4866	3.82887	24.2495	16.5918	8.93404	67.6435	140.392	91.893	114.866	31.9073
	2380	48235	2498	6	Caudoputamen- intermediate dorsomedial dorsal tip	CPi, dm, dt	Cpi, dm	48235	0.93688	225.216	73.6487	115.276	38.4254	10.6737	193.194	181.453	296.73	239.091	72.5813
	2500	48236	2492	6	Caudoputamen- intermediate ventromedial	CPi, vm	CPi	48236	1.86368	79.9493	123.948	77.2665	61.1693	12.3412	185.654	163.655	99.266	167.411	74.5836
	2302	48237	2500	6	Caudoputamen- intermediate ventromedial ventromedial	CPi, vm, vm	CPi, vm	48237	0.7884	121.766	39.3201	34.2466	53.2725	3.80518	139.523	145.865	81.1771	178.843	45.6621
	2480	48238	2500	6	Caudoputamen- intermediate ventromedial ventral	CPi, vm, v	CPi, vm	48238	0.78376	63.795	250.077	145.453	81.6577	24.2421	267.939	188.833	105.9	165.867	121.211
	2483	48239	2500	6	Caudoputamen- intermediate ventromedial central ventromedial	CPi, vm, cvm	CPi, vm	48239	0.29152	10.2909	13.7212	10.2909	27.4424	3.4303	89.1877	144.072	130.351	140.642	27.4424
	2499	48240	2492	6	Caudoputamen- intermediate dorsolateral	CPi, dl	CPi	48240	2.06764	15.9602	65.2918	201.196	33.855	8.70558	169.275	184.752	230.698	207.483	77.3829
	2300	48241	2499	6	Caudoputamen- intermediate dorsolateral dorsal	CPi, dl, d	Cpi, dl	48241	1.06432	15.0331	58.2532	180.397	23.4892	8.4561	136.237	178.518	240.529	182.276	67.6488
	2301	48242	2499	6	Caudoputamen- intermediate dorsolateral intermedial dorsal	CPi, dl, imd	Cpi, dl	48242	1.00332	16.9437	72.7584	223.259	44.8511	8.97022	204.322	191.365	220.269	234.222	87.7088
	2501	48243	2492	6	Caudoputamen- intermediate ventrolateral	CPi, vl	CPi	48243	4.87596	62.962	183.759	169.608	113.619	38.3514	351.726	301.479	361.365	309.683	181.093
	2479	48244	2501	6	Caudoputamen- intermediate ventrolateral intermedial ventral	CPi, vl, imv	CPi, vl	48244	0.95476	27.232	94.2645	138.255	46.0849	15.7108	223.093	228.33	226.235	194.813	67.0326
	2482	48245	2501	6	Caudoputamen- intermediate ventrolateral ventral	CPi, vl, v	CPi, vl	48245	1.19744	61.7985	202.933	210.449	134.454	40.0855	299.806	243.854	464.324	335.716	146.145
	2481	48246	2501	6	Caudoputamen- intermediate ventrolateral ventral tip	CPi, vl, vt	CPi, vl	48246	1.92736	100.656	281.214	217.396	168.106	59.6671	528.184	405.736	457.621	425.452	314.939
	2370	48247	2501	6	Caudoputamen- intermediate ventrolateral central ventrolateral	CPi, vl, cvl	CPi, vl	48247	0.7964	16.3235	26.3687	30.1356	31.3913	11.3009	156.956	223.506	135.61	128.076	46.4591
	2496	48250	672	5	Caudoputamen- caudal	CPc	CP	48250	7.33052	96.8553	192.074	451.264	136.416	47.6092	279.516	271.195	302.025	248.55	290.157
	2493	48251	2496	6	Caudoputamen- caudal dorsal	CPc, d	CPc	48251	2.189	59.3878	104.157	421.197	92.2796	18.73	172.225	216.537	305.619	232.983	259.936
	2484	48252	2493	6	Caudoputamen- caudal dorsal dorsomedial	CPc, d, dm	CPc, d	48252	0.65752	57.7929	109.502	477.552	106.461	18.2504	191.629	147.524	275.277	281.36	185.546
	2485	48253	2493	6	Caudoputamen- caudal dorsal dorsolateral	CPc, d, dl	CPc, d	48253	0.76636	19.573	32.6217	401.9	20.8779	10.439	65.2435	142.231	197.035	123.963	174.853
	2486	48254	2493	6	Caudoputamen- caudal dorsal ventromedial	CPc, d, vm	CPc, d	48254	0.39328	38.1408	61.0252	355.98	27.9699	20.3417	195.789	213.588	81.367	96.6233	157.648
	2494	48255	2496	6	Caudoputamen- caudal intermediate	CPc, i	CPc	48255	3.52068	83.2226	160.764	460.422	111.626	40.6172	182.067	253.36	207.062	189.736	181.499
	2487	48256	2494	6	Caudoputamen- caudal intermediate dorsal	CPc, i, d	CPc, i	48256	0.97012	36.078	46.386	418.505	35.0472	12.3696	139.158	192.76	157.712	154.62	170.082
	2489	48257	2494	6	Caudoputamen- caudal intermediate ventromedial	CPc, i, vm	CPc, i	48257	0.74564	52.3041	84.4912	333.941	48.2807	44.2573	210.557	331.259	193.123	160.936	182.394
	2488	48258	2494	6	Caudoputamen- caudal intermediate ventrolateral	CPc, i, vl	CPc, i	48258	0.82232	42.5625	130.12	457.243	134.984	46.2107	245.646	314.963	235.918	211.596	137.416
	2490	48259	2496	6	Caudoputamen- caudal ventral	CPc, v	CPc	48259	1.62084	177.069	378.816	471.977	249.87	101.799	636.09	383.752	503.443	397.325	566.99
	2495	48260	672	5	Caudoputamen- caudal extreme	CPce	CP	48260	0.72712	625.756	679.393	576.246	565.244	244.801	510.232	387.831	462.097	400.209	540.489
	2001	48296	672	5	Lateral stripe of the striatum	LSS	Cpu	48296	0.1038	529.865	1445.09	626.204	289.017	77.0713	1127.17	1117.53	1493.26	1589.6	1512.52
	2050	48297	672	5	Amygdalostriatal transition area	ASt	Cpu	48297	0.30832	771.925	898.417	668.137	846.523	363.259	1553.58	989.232	1086.53	1187.08	1329.79
	493	48300	477	3	Striatum ventral region	STRv	STR	48300	10.7	467.288	822.988	368.69	268.597	69.3455	871.959	584.951	687.381	771.025	673.736
	56	48400	493	4	Accumbens nucleus	Acb	STRv	48400	4.80392	384.478	854.51	355.959	195.465	39.3429	657.588	493.555	578.694	726.282	526.237
	2074	48410	56	5	Accumbens nucleus core region	AcbC	Acb	48410	2.05576	390.61	469.899	293.809	112.367	19.4575	334.183	321.536	371.152	484.979	311.32
	2006	48420	56	5	Accumbens nucleus shell region	AcbSh	Acb	48420	1.73988	478.769	1391.48	462.101	289.1	56.3257	906.959	515.553	614.41	797.756	508.656
	2007	48430	56	5	Lateral accumbens shell region	LAcbSh	Acb	48430	1.00828	209.267	712.104	299.52	203.317	50.5812	886.658	806.324	940.215	1094.93	994.763
	998	48500	493	4	Interstitial nucleus of the posterior limb of the anterior commissure	IPAC	STRv	48500	1.07112	435.992	641.385	589.103	391.179	137.24	712.338	617.111	748.749	747.815	897.192
	2012	48510	998	5	Interstitial nucleus of the posterior limb of the anterior commissure medial part	IPACM	IPAC	48510	0.33584	464.507	532.992	547.88	401.977	107.194	795.021	658.051	821.82	866.484	1092.78
	2372	48520	998	5	Interstitial nucleus of the posterior limb of the anterior commissure lateral part	IPACL	IPAC	48520	0.67876	419.883	639.401	562.791	327.067	131.121	688.019	617.302	726.324	701.279	816.194
	754	48600	493	4	Olfactory tubercle	Tu	STRv	48600	4.52084	555.428	810.026	298.617	282.47	79.8524	1053.79	660.497	783.483	810.248	758.266
[truncated: 821 more rows]

## Sheet: DENSITY Exp2_300min group
Notes	id	structure_order	parent_id	Natural order	Name	acronym	parent_acronym	Structure_order	ROI_Volume_mm_3	CF1_300	CF2_300	CF3_300	CF4_300	CF5_300	CF6_300	CF7_300	CM1_300	CM3_300	CM4_300	DF1_300	DF2_300	DF3_300	DF4_300	DF5_300	DF6_300	DF7_300	DM1_300	DM2_300	DM3_300	DM4_300	DM5_300
[truncated: 1,429 more rows]

[truncated: 2 more sheets: Counts_Density_914regions, ExtendedFig2b_L2_density]
