# Supplementary material for: Genetic capture for conscious state transitions
Source: Research Square preprint supplement (doi:10.21203/rs.3.rs-6192781/v1), 2025-06-19
Supplement: Supplementary file 16 [file ba17a27fc57c072de07e4c5c.docx]

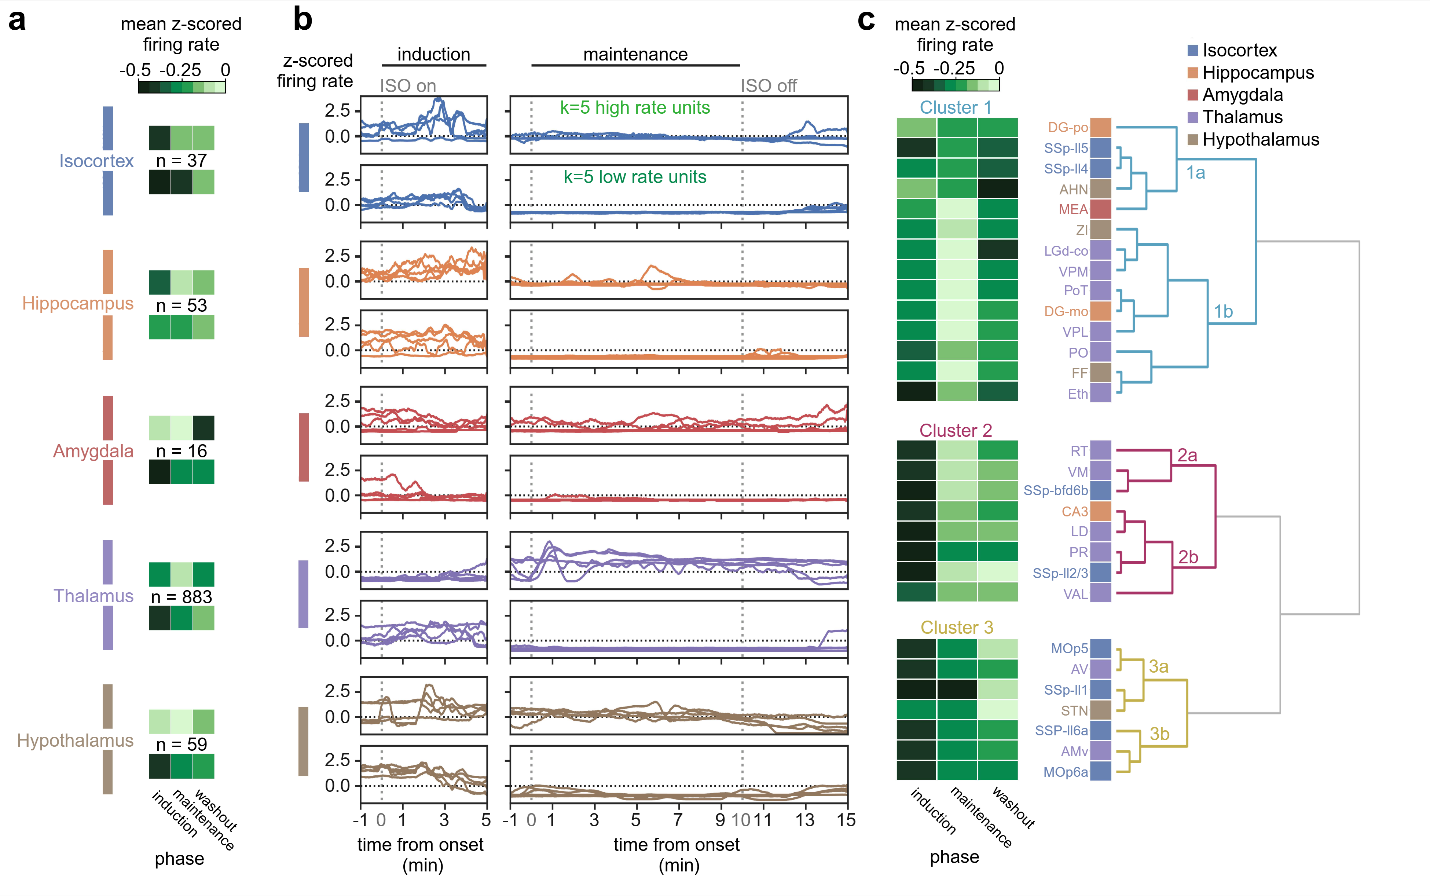


**Extended Figure 8. Response variability during isoflurane.** (**a**) Heatmaps showing mean normalized firing for each major region (isocortex, hippocampus, amygdala, thalamus, and hypothalamus) across anesthetic phases (induction, maintenance, washout) with the total unit counts (*n*) for each region. (**b**) Representative traces from units in major regions with diverse responses under isoflurane. For each major region, traces show 5 units (*k*=5 from total unit count *n* for each region) with the highest (top) and lowest (bottom) mean normalized firing during the maintenance phase. Left traces show 1 min prior and 5 min following onset of induction at the dashed line (“ISO on”). Right traces show 1 min prior and 10 min following onset of maintenance phase (first dashed line) and the “ISO off” time (right dashed line). (**c**) Mean z-scored firing from each experimental phase was clustered (Ward’s method) for all subregions obtained in recordings. Hierarchical clustering of subpopulation means revealed 3 heterogeneous clusters (CHI=11.12), each with subclusters (e.g., 1a: Cluster 1a) linking spatially distributed cortical and subcortical structures. See Extended Tables 9 and 12 for detailed data.
