# Supplementary material for: Genetic capture for conscious state transitions
Source: Research Square preprint supplement (doi:10.21203/rs.3.rs-6192781/v1), 2025-06-19
Supplement: Supplementary file 17 [file c9853666bf22c845b494b7fb.xlsx]

## Sheet: permutation_results_Control_vs_
Acronym 1	Acronym 2	Name 1	Name 2	Test Statistic	p-value	sig
AOB	AC	Accessory olfactory bulb	Anterior commissural nucleus	1.13622	0.00049995	TRUE
Arc	AP	Arcuate hypothalamic nucleus	Area postrema	0.947871	0.00019998	TRUE
Ce	12N	Central amygdalar nucleus	Hypoglossal nucleus	-1.61598	0.00089991	TRUE
IO	Bar	Inferior olivary nucleus	Barrington nucleus	0.909051	0.00069993	TRUE
LA	Ang	Lateroanterior hypothalamic nucleus	Angular thalamic nucleus	0.86161	0.00029997	TRUE
LA	CN	Lateroanterior hypothalamic nucleus	Cochlear nuclei	0.549628	0.00019998	TRUE
LM	CL	Lateral mamilllary nucleus	Centrolateral thalamic nucleus	0.962295	0.00069993	TRUE
LM	CM	Lateral mamilllary nucleus	Central medial thalamic nucleus	0.669232	0.00089991	TRUE
LM	DPGi	Lateral mamilllary nucleus	Dorsal paragigantocellular nucleus	1.2057	0.00049995	TRUE
Li	Bar	Linear nucleus of the hindbrain	Barrington nucleus	1.28436	0.00039996	TRUE
MEnt	ESO	Medial entorhinal cortex	Episupraoptic nucleus	1.06431	9.999e-05	TRUE
MEnt	LA	Medial entorhinal cortex	Lateroanterior hypothalamic nucleus	0.854767	0.00019998	TRUE
MPO	AC	Medial preoptic nucleus	Anterior commissural nucleus	1.01967	0.00039996	TRUE
MPO	LA	Medial preoptic nucleus	Lateroanterior hypothalamic nucleus	0.482318	0.00039996	TRUE
MVe	IO	Medial vestibular nucleus	Inferior olivary nucleus	0.967557	0.0009999	TRUE
MiTg	AC	Microcellular tegmental nucleus	Anterior commissural nucleus	1.11398	0.00079992	TRUE
MiTg	CM	Microcellular tegmental nucleus	Central medial thalamic nucleus	0.673745	0.00029997	TRUE
MiTg	LM	Microcellular tegmental nucleus	Lateral mamilllary nucleus	1.31082	9.999e-05	TRUE
MnPO	AOB	Median preoptic nucleus	Accessory olfactory bulb	1.42901	0.00019998	TRUE
MnPO	Bar	Median preoptic nucleus	Barrington nucleus	1.11333	9.999e-05	TRUE
MnPO	CM	Median preoptic nucleus	Central medial thalamic nucleus	1.26539	0.00029997	TRUE
MnPO	CN	Median preoptic nucleus	Cochlear nuclei	0.602762	0.00059994	TRUE
MnPO	LA	Median preoptic nucleus	Lateroanterior hypothalamic nucleus	0.763648	0.00059994	TRUE
MnPO	LC	Median preoptic nucleus	Locus coeruleus	0.781356	0.00059994	TRUE
MnPO	MPO	Median preoptic nucleus	Medial preoptic nucleus	0.770072	9.999e-05	TRUE
MnPO	MiTg	Median preoptic nucleus	Microcellular tegmental nucleus	1.22893	0.00029997	TRUE
MnR	Bar	Median raphe nucleus	Barrington nucleus	0.723672	0.00059994	TRUE
PSTh	LM	Parasubthalamic nucleus	Lateral mamilllary nucleus	0.833413	0.00089991	TRUE
PVT	MPO	Paraventricular nucleus of the thalamus	Medial preoptic nucleus	0.49923	0.00019998	TRUE
PVT	MiTg	Paraventricular nucleus of the thalamus	Microcellular tegmental nucleus	1.02408	0.00039996	TRUE
PaS	LM	Parasubiculum	Lateral mamilllary nucleus	1.26753	0.00069993	TRUE
PaXi	MiTg	Paraxiphoid nucleus of thalamus	Microcellular tegmental nucleus	0.523761	0.00069993	TRUE
PaXi	MnPO	Paraxiphoid nucleus of thalamus	Median preoptic nucleus	0.932481	0.00019998	TRUE
Pe	MPO	Periventricular hypothalamic nucleus	Medial preoptic nucleus	0.85503	9.999e-05	TRUE
Pe	MiTg	Periventricular hypothalamic nucleus	Microcellular tegmental nucleus	1.15534	0.00029997	TRUE
Pe	MnPO	Periventricular hypothalamic nucleus	Median preoptic nucleus	0.632265	0.00049995	TRUE
PoMn	DG	Posteromedian thalamic nucleus	Dentate gyrus	1.41214	0.00039996	TRUE
PoMn	LM	Posteromedian thalamic nucleus	Lateral mamilllary nucleus	1.28575	0.00079992	TRUE
PrEW	PPy	Pre-Edinger-Westphal nucleus	Parapyramidal nucleus	-1.3951	0.0009999	TRUE
RCh	MEnt	Retrochiasmatic area	Medial entorhinal cortex	0.841787	0.00049995	TRUE
RCh	MnPO	Retrochiasmatic area	Median preoptic nucleus	0.876596	0.00059994	TRUE
Re	MnPO	Reuniens thalamic nucleus	Median preoptic nucleus	0.82711	0.00019998	TRUE
Re	Pe	Reuniens thalamic nucleus	Periventricular hypothalamic nucleus	0.633758	0.00089991	TRUE
SG	PaS	Suprageniculate thalamic nucleus	Parasubiculum	1.41551	0.00039996	TRUE
StHy	MiTg	Striohypothalamic nucleus	Microcellular tegmental nucleus	0.877688	0.00059994	TRUE
SuVe	IO	Superior vestibular nucleus	Inferior olivary nucleus	1.29176	0.00039996	TRUE
Te	MiTg	Terete hypothalamic nucleus	Microcellular tegmental nucleus	1.5078	9.999e-05	TRUE
Tz	MnPO	Nucleus of the trapezoid body	Median preoptic nucleus	1.17855	0.00069993	TRUE
VOLT	AC	Vascular organ of the lamina terminalis	Anterior commissural nucleus	1.21076	0.0009999	TRUE
VOLT	MnPO	Vascular organ of the lamina terminalis	Median preoptic nucleus	1.02858	0.00049995	TRUE
VRe	MiTg	Ventral reuniens thalamic nucleus	Microcellular tegmental nucleus	0.587442	0.00079992	TRUE
VTM	Su3C	Ventral tuberomammillary nucleus	Supraoculomotor cap	1.29626	0.0009999	TRUE
vSub	ESO	Ventral subiculum	Episupraoptic nucleus	0.737024	0.00029997	TRUE
vSub	LA	Ventral subiculum	Lateroanterior hypothalamic nucleus	0.810987	0.00019998	TRUE
vSub	MnPO	Ventral subiculum	Median preoptic nucleus	0.662023	0.00039996	TRUE
vSub	PVT	Ventral subiculum	Paraventricular nucleus of the thalamus	0.586935	0.00039996	TRUE
vSub	RCh	Ventral subiculum	Retrochiasmatic area	0.763682	0.00029997	TRUE
LPB	AP	Lateral parabrachial nucleus	Area postrema	0.956495	0.00019998	TRUE
LPB	LC	Lateral parabrachial nucleus	Locus coeruleus	1.25678	0.00019998	TRUE
LPB	MPL	Lateral parabrachial nucleus	Medial paralemniscial nucleus	1.16563	0.00019998	TRUE
LPB	Rbd	Lateral parabrachial nucleus	Rhabdoid nucleus	1.66721	0.00059994	TRUE
LPB	SM	Lateral parabrachial nucleus	Nucleus of stria medullaris	1.23081	0.00089991	TRUE
