# Supplementary material for: Genetic capture for conscious state transitions
Source: Research Square preprint supplement (doi:10.21203/rs.3.rs-6192781/v1), 2025-06-19
Supplement: Supplementary file 18 [file cadaa72fff47e09e427e2687.xlsx]

## Sheet: Legend
	Region	Abbrev.	Subregion
	Cortical subplate	EP	Endopiriform nucleus
		CLA	Claustrum
		BMA	Basomedial amygdalar nucleus
		BLA	Basolateral amygdalar nucleus
		LA	Lateral amygdalar nucleus
		CTXsp	Cortical subplate
	Olfactory	PIR	Piriform area
		DP	Dorsal peduncular area
		PAA	Piriform-amygdalar area
		COA	Cortical amygdalar area
		MOB	Main olfactory bulb
		AON	Anterior olfactory nucleus
		AOB	Accessory olfactory bulb
		OLF	Olfactory
	Isocortex	PL	Prelimbic
		AI	Agranular insula
		PERI	Perirhinal
		ECT	Ectorhinal
		ORB	Orbital
		VIS	Visual
		TEa	Temporal
		MO	Motor
		SS	Somatosensory
		ILA	Infralimbic
		ACA	Anterior cingulate
		RSP	Retrosplenial
		AUD	Auditory
		PTLp	Posterior parietal association
	Retrohippocampal	ENT	Entorhinal
		PAR	Parasubiculum
		SUB	Subiculum
		PRE	Presubiculum
		POST	Postsubiculum
		RHP	Retrohippocampal region
	Hippocampal	FC	Fasciola cinerea
		DG	Dentate gyrus
		CA3	Field CA3
		CA1	Field CA1
		IG	Induseum griseum
		HPF	Hippocampal formation
	Cortical plate	CTXpl	Cortical plate
	Cerebral cortex	CTX	Cerebral cortex
	Pallidum	SI	Substantia innominata
		MA	Magnocellular nucleus
		MS	Medial septal nucleus
		TRS	Triangular nucleus of septum
		BST	Bed nuclei of the stria terminalis
		PAL	Pallidum
	Striatum	OT	Olfactory tubercle
		ACB	Nucleus accumbens
		CP	Caudoputamen
		CEA	Central amygdalar nucleus
		MEA	Medial amygdalar nucleus
		AAA	Anterior amygdalar area
		SF	Septofimbrial nucleus
		LS	Lateral septal nucleus
		STR	Striatum
	Cerebral nuclei	CNU	Cerebral nuclei
	Cerebellum	PYR	Pyramus (VIII)
		FOTU	Folium-tuber vermis (VII)
		CUL	Culmen
		CENT	Central lobule
		FL	Flocculus
		PFL	Paraflocculus
		PRM	Paramedian lobule
		SIM	Simple lobule
		HEM	Hemispheric regions
		CBX	Cerebellar cortex
	Midbrain	SNc	Substantia nigra, compact part
		CLI	Central linear nucleus raphe
		RL	Rostral linear nucleus raphe
		IPN	Interpeduncular nucleus
		RAmb	Midbrain raphe nuclei
		PPN	Pedunculopontine nucleus
		IC	Inferior colliculus
		SC	Superior colliculus
		EW	Edinger-Westphal nucleus
		PAG	Periaqueductal gray
		CUN	Cuneiform nucleus
		SNr	Substantia nigra, reticular part
		III	Oculomotor nucleus
		MRN	Midbrain reticular nucleus
		NPC	Nucleus of the posterior commissure
		APN	Anterior pretectal nucleus
		PRT	Pretectal region
		MB	Midbrain
	Thalamus	VPM	Ventral posteromedial nucleus of the thalamus
		VPL	Ventral posterolateral nucleus of the thalamus
		VP	Ventral posterior complex of the thalamus
		VM	Ventral medial nucleus of the thalamus
		MG	Medial geniculate complex
		DOR	Thalamus
		RE	Nucleus of reuniens
		PT	Parataenial nucleus
		PVT	Paraventricular nucleus of the thalamus
		MTN	Midline group of the dorsal thalamus
		PF	Parafascicular nucleus
		CM	Central medial nucleus of the thalamus
		MD	Mediodorsal nucleus of thalamus
		RT	Reticular nucleus of the thalamus
		AV	Anteroventral nucleus of thalamus
		LD	Lateral dorsal nucleus of thalamus
		IAD	Interanterodorsal nucleus of the thalamus
		IGL	Intergeniculate leaflet of the lateral geniculate complex
		LGv	Ventral part of the lateral geniculate complex
		TH	Thalamus
	Hypothalamus	PH	Posterior hypothalamic nucleus
		AHN	Anterior hypothalamic nucleus
		PVHd	Paraventricular hypothalamic nucleus, descending division
		MPN	Medial preoptic nucleus
		MEZ	Hypothalamic medial zone
		FF	Fields of Forel
		ZI	Zona incerta
		LHA	Lateral hypothalamic area
		LZ	Hypothalamic lateral zone
		PVH	Paraventricular hypothalamic nucleus
		PVa	Periventricular hypothalamic nucleus, anterior part
		PVZ	Periventricular zone
		MPO	Medial preoptic area
		SBPV	Subparaventricular zone
		SCH	Suprachiasmatic nucleus
		PV	Periventricular hypothalamic nucleus
		HY	Hypothalamus
	Interbrain	IB	Interbrain
	Pons	PG	Pontine gray
		PCG	Pontine central gray
		DTN	Dorsal tegmental nucleus
		TRN	Tegmental reticular nucleus
		PRNc	Pontine reticular nucleus, caudal part
		PB	Parabrachial nucleus
		SOC	Superior olivary complex
		CS	Superior central nucleus raphe
		NI	Nucleus incertus
		SLC	Subceruleus nucleus
		RPO	Nucleus raphe pontis
		LC	Locus ceruleus
		PRNr	Pontine reticular nucleus
		P	Pons
	Medulla	DCO	Dorsal cochlear nucleus
		SPVI	Spinal nucleus of the trigeminal, interpolar part
		SPVC	Spinal nucleus of the trigeminal, caudal part
		PARN	Parvicellular reticular nucleus
		DMX	Dorsal motor nucleus of the vagus nerve
		XII	Hypoglossal nucleus
		x	Nucleus x
		SPIV	Spinal vestibular nucleus
		LAV	Lateral vestibular nucleus
		MV	Medial vestibular nucleus
		VII	Facial motor nucleus
		VI	Abducens nucleus
		MDRN	Medullary reticular nucleus
		LRN	Lateral reticular nucleus
		LIN	Linear nucleus of the medulla
		IRN	Intermediate reticular nucleus
		GRN	Gigantocellular reticular nucleus
		MY	Medulla
	Hindbrain	HB	Hindbrain
	ventricular systems	SEZ	subependymal zone

## Sheet: Cluster validation summary
	Direction	FDR q	p value thresh	Valid clusters	# of valid clusters	# of clusters	Validation rate
	Control > Isoflurane	0.05	0.00122678	1 2 3 4 5 6 7 8 9 10 11 12 13 14 15 16 17 18 19 21 22 23 24	23	24	0.9583
	Control > Isoflurane	0.1	0.00501674	1 2 3 4 5 6 7 8 9 10 11 13 14 15 16 18 19 20 21 22	20	22	0.9091
	Control > Isoflurane	0.15	0.0117052	1 2 3 4 6 8 9 10 11 13	10	13	0.7692
	Control > Isoflurane	0.2	0.0195643	1 2 3 5 6 7 8 10 14	9	14	0.6429
	Control > Isoflurane	0.3	0.0371777	1 2 3 4 5 6 8 9 11 14 17 18 19 21 23	15	24	0.625
	Control < Isoflurane	0.005	5.61476e-05	1 2 3 4 5 6 7 8 9 10 11 12 13 14 15 16 17 18 19 20 22 23 24 25 26 27 28 30 31 32 34 35 36 37 38	35	38	0.921053
	Control < Isoflurane	0.01	0.000446439	1 2 3 4 5 6 7 8 9 10 11 12 13 14 15 18 21 23 24 26 27 28 30 31 32 33 34 37 38 39 40 41 42 43	34	44	0.772727
	Control < Isoflurane	0.05	0.00824946	1 2 3 4 6 7 8 9 11 12 18 19 20 26 33 39 42 43	18	47	0.382979
	Control < Isoflurane	0.1	0.0251941	1 2 5 8 12 14 18 21 31 34 41	11	59	0.186441
	Control < Isoflurane	0.15	0.0472665	1 7 9 16 29	5	33	0.151515

## Sheet: Control > Iso | cluster info
	Control > Isoflurane (q < 0.05)
	Cluster	Volume	CoG	~Region	Top_Region_1	Top_Region_2	Top_Region_3	Top_Region_4
	2****	0.3423	131,148,80.8	Olfactory	AON (42%)	PIR (26%)	OLF (19%)	EPd (11%)
	11**	0.0713	160129144	Orbital	ORBvl5 (53%)	ORBvl2/3 (36%)	ORBm5 (10%)
	15****	0.0358	126147122		ORBl5 (85%)	ORBl2/3 (15%)
	1***	1.1152	96.1,327,211	Visual	VISp (57%)	PTLp (16%)	POST (11%)	VISl (8%)
	16***	0.0323	139182185	Motor	MOs6a (42%)	MOp6a (27%)	MOs5 (21%)	MOp5 (9%)
	23***	0.003	140199192		MOp6a (52%)	MOp5 (48%)
	22****	0.003	104164158		MOp5 (61%)	MOp6a (39%)
	4***	0.2893	42.2,252,143	Somatosensory	SSs4 (37%)	SSs5 (33%)	SSs2/3 (17%)	SSs6a (7%)
	6**	0.1669	64.3,189,146		SSp-m4 (57%)	SSp-m5 (18%)	SSp-m6a (8%)	SSs4 (8%)
	17***	0.0299	176252208	Retrosplenial	RSPv5 (35%)	RSPv2/3 (25%)	ACAv5 (13%)	ACAv2/3 (13%)
	19*	0.0119	39.5,299,176	Auditory	AUDp5 (44%)	AUDp4 (36%)	AUDd4 (14%)	AUDp2/3 (3%)
	13***	0.0458	89.9,370,159	Hippocampal	PAR (47%)	ENTm3 (24%)	ENTm2 (22%)	ENTm5 (7%)
	14**	0.0396	165257167		CA3 (51%)	DG-sg (26%)	DG-po (22%)
	8****	0.1451	138383181	Midbrain, sensory related	ICc (66%)	ICe (23%)	ICd (11%)
	3****	0.3348	166346203		SCsg (57%)	SCop (29%)	SCig (9%)	SCzo (5%)
	9***	0.1098	145324160	Midbrain, motor related	SCm (46%)	PRT (32%)	MB (18%)	MRN (4%)
	10**	0.1086	159301148	Midbrain	MB (53%)	APN (27%)	NPC (9%)	PF (3%)
	21**	0.0052	177385120		MB (56%)	MRN (28%)	PCG (6%)	DTN (5%)
	7**	0.154	121276118	Thalamus, sensory-motor cortex related	VPM (80%)	VPL (20%)
	12**	0.0496	106300143	Thalamus	TH (75%)	LGv (12%)	IGL (10%)	MGv (2%)
	18*	0.0287	144,293,94.9	Hypothalamus	ZI (58%)	FF (22%)	VM (15%)	HY (5%)
	5****	0.2791	164,352,61.5	Pons, motor related	PG (44%)	TRN (32%)	P (11%)	PRNr (8%)
	24*	0.0019	178,403,90.4		PCG (25%)	P (24%)	VI (17%)	NI (17%)
	Control > Isoflurane (q < 0.1)
	Cluster	Volume	CoG	~Region	Top_Region_1	Top_Region_2	Top_Region_3	Top_Region_4
	4****	0.6158	129,148,87.9	Olfactory	AON (33%)	PIR (21%)	OLF (15%)	ORBl5 (12%)
	9**	0.1287	158130145	Orbital	ORBvl5 (50%)	ORBvl2/3 (29%)	ORBm5 (11%)	ORBl5 (4%)
	15**	0.0155	58.6,231,139	Somatosensory	SSs6a (79%)	SSp-n6a (11%)	SSp-m6a (5%)	SSs5 (5%)
	3***	0.6631	43.8,257,147		SSs5 (32%)	SSs4 (24%)	SSs2/3 (16%)	SSs6a (10%)
	21**	0.002	62225168		SSp-n4 (79%)	SSp-n5 (21%)
	16**	0.0148	129236210		SSp-ll5 (71%)	SSp-ll4 (26%)	SSp-ll2/3 (3%)
	14**	0.0188	92.2,241,195		SSp-bfd5 (46%)	SSp-bfd (41%)	SSp-bfd4 (10%)	SSp-n5 (2%)
	2***	1.0088	94187164		SSp (52%)	MOp (29%)	MOs (14%)	SSs (5%)
	7**	0.2408	172247208	Retrosplenial	RSPv (46%)	ACAd (28%)	ACAv (17%)	RSPd (5%)
	1***	2.9003	116329201	Isocortex	Isocortex (64%)	SCs (13%)	HPF (6%)	PRT (5%)
	11**	0.0803	90.8,369,158	Hippocampal	PAR (53%)	ENTm2 (18%)	ENTm3 (17%)	ENTm5 (7%)
	22*	0.0018	136273172		CA3 (41%)	DG-sg (40%)	DG-po (14%)	DG-mo (4%)
	10**	0.0819	165259166		CA3 (62%)	DG-po (25%)	DG-sg (11%)	DG-mo (3%)
	19**	0.0029	125355151	Midbrain, sensory related	ICe (74%)	MB (16%)	MRN (9%)
	8****	0.2307	139383180		ICc (62%)	ICe (23%)	ICd (15%)
	13**	0.0196	175385121	Midbrain, motor related	MRN (31%)	MB (29%)	PAG (14%)	DTN (10%)
	5**	0.4596	124284118	Thalamus, sensory-motor cortex related	VP (60%)	TH (15%)	ZI (7%)	LGv (4%)
	6***	0.4082	164,352,62.3	Pons, motor related	PG (43%)	TRN (28%)	P (13%)	PRNr (10%)
	18**	0.0052	178,404,90.9		PCG (23%)	NI (22%)	P (19%)	VI (16%)
	20***	0.0021	140,465,88.8	Medulla, sensory related	SPVC (99%)	SPVI (1%)
	Control > Isoflurane (q < 0.15)
	Cluster	Volume	CoG	~Region	Top_Region_1	Top_Region_2	Top_Region_3	Top_Region_4
	1***	9.1748	109257175	Isocortex	Isocortex (76%)	OLF (6%)	HPF (5%)	SCs (4%)
	8*	0.0119	137272172	Hippocampal	CA3 (62%)	DG-po (18%)	DG-sg (13%)	DG-mo (6%)
	10*	0.0082	165403142	Cerebellar cortex	CENT2 (100%)
	4****	0.3045	139383179	Midbrain, sensory related	ICc (57%)	ICe (25%)	ICd (17%)
	6**	0.0362	175383122	Midbrain, motor related	MRN (28%)	PAG (24%)	MB (21%)	DTN (9%)
	13**	0.0041	132344126		MRN (100%)
	2**	0.6833	126285116	Thalamus, sensory-motor cortex related	VP (55%)	TH (14%)	ZI (8%)	LGv (5%)
	3***	0.4773	165,352,62.5	Pons, motor related	PG (42%)	TRN (26%)	P (15%)	PRNr (10%)
	9**	0.0091	177,404,91.1		P-mot (33%)	P-sat (23%)	P (22%)	VI (14%)
	11***	0.0077	140,465,88.5	Medulla, sensory related	SPVC (89%)	SPVI (10%)
	Control > Isoflurane (q < 0.2)
	Cluster	Volume	CoG	~Region	Top_Region_1	Top_Region_2	Top_Region_3	Top_Region_4
	10**	0.0035	168152109	Olfactory	DP (96%)	ORBm5 (4%)
	1***	12.4705	111256171	Isocortex	Isocortex (73%)	OLF (5%)	HPF (5%)	DORsm (4%)
	14***	0.002	159212123	Striatum	LSr (100%)
	6*	0.0151	166402143	Cerebellar cortex	CENT2 (100%)
	3****	0.3516	139383179	Midbrain, sensory related	ICc (55%)	ICe (26%)	ICd (18%)
	5**	0.0515	175382123	Midbrain, motor related	PAG (28%)	MRN (26%)	MB (16%)	P-mot (14%)
	2***	0.5181	165,352,62.6	Pons, motor related	PG (40%)	TRN (25%)	P (16%)	PRNr (11%)
	8**	0.0123	177,405,91.3		P-mot (33%)	P (23%)	P-sat (22%)	MY-mot (13%)
	7***	0.0139	140,465,88.4	Medulla, sensory related	SPVC (83%)	SPVI (13%)	MDRNd (2%)	MY (2%)
	Control > Isoflurane (q < 0.3)
	Cluster	Volume	CoG	~Region	Top_Region_1	Top_Region_2	Top_Region_3	Top_Region_4
	17*	0.004	104388122	General region not found	CUL4, 5 (94%)	SIM (6%)
	9***	0.0087	168152108	Olfactory	DP (91%)	ORBm5 (6%)	ILA5 (1%)
	14***	0.0043	174,123,94.6		MOB (100%)
	11*	0.0071	166,120,73.7		MOB (100%)
	21**	0.0026	90131141	Motor	MOs2/3 (57%)	MOp2/3 (42%)	MOs1 (1%)
	18*	0.0033	78.6,137,140		MOp2/3 (63%)	MOp1 (37%)
	1***	16.3087	112258171	Isocortex	Isocortex (71%)	HPF (4%)	OLF (4%)	DORsm (4%)
	8***	0.0102	161215127	Striatum	LSr (66%)	SF (22%)	TRS (7%)	LSv (5%)
	4*	0.0275	167402143	Cerebellar cortex	CENT2 (99%)	PB (1%)
	3**	0.0814	175381125	Midbrain, motor related	PAG (33%)	MRN (22%)	P-mot (16%)	MB (12%)
	19**	0.003	145250134	Thalamus, polymodal association cortex related	AV (93%)	LD (7%)
	23**	0.002	135,257,75.2	Hypothalamus	LHA (99%)
	2**	0.5697	165,353,62.7	Pons, motor related	PG (38%)	TRN (24%)	P (18%)	PRNr (12%)
	6**	0.0168	177,405,91.5		P-mot (32%)	P (23%)	P-sat (22%)	MY-mot (14%)
	5***	0.0265	140,466,88.4	Medulla, sensory related	SPVC (79%)	SPVI (13%)	MDRNd (4%)	MY (4%)

## Sheet: Control < Iso | cluster info
	Control < Isoflurane (q < 0.005)
	Cluster	Volume	CoG	~Region	Top_Region_1	Top_Region_2	Top_Region_3	Top_Region_4
	31*	0.0026	58.9,253,81.2	Cortical subplate	EPd (100%)
	4***	0.2005	91.6,299,46.1		BMAp (29%)	MEA (21%)	COApl (19%)	COApm (18%)
	36*	0.0018	85.4,243,42		BMAa (44%)	CTXsp (24%)	EPv (17%)	PIR (13%)
	7***	0.1109	61.7,231,46.4	Olfactory	PIR (97%)	PAA (3%)
	12***	0.05	23.9,318,116	Ectorhinal	ECT2/3 (46%)	PERI2/3 (33%)	PERI1 (7%)	TEa5 (6%)
	37****	0.0016	58.3,375,191	Visual	VISpl2/3 (82%)	VISpl1 (17%)
	38*	0.0016	182165142	Anterior cingulate	ACAv1 (47%)	ILA1 (43%)	ACAv2/3 (5%)	ILA2/3 (5%)
	30*	0.0026	147351214	Retrosplenial	RSPd5 (64%)	RSPd2/3 (33%)	RSPv5 (3%)
	1**	0.4791	73.4,355,83.9	Hippocampal	ENTm (35%)	SUB (29%)	ENTl (15%)	CA1 (11%)
	24*	0.0054	33.1,330,94.9		ENTl3 (51%)	ENTl5 (49%)
	32****	0.0023	85.3,352,128		PRE (75%)	DG-mo (25%)
	13**	0.0428	103346101		DG-mo (27%)	CA3 (25%)	DG-sg (18%)	PAR (14%)
	26***	0.0036	115,318,88.4		CA3 (82%)	SNr (18%)
	9***	0.0886	125,197,33.5	Pallidum	SI (50%)	OT (50%)
	14****	0.0398	122,227,33.9		MA (40%)	OT (29%)	STR (13%)	AAA (10%)
	8****	0.0934	146,212,99.9		BST (75%)	HY (25%)
	18***	0.0134	154,235,86		BST (73%)	STR (13%)	PAL (6%)	CP (5%)
	19*	0.0121	151,155,89.3	Striatum	ACB (48%)	AON (47%)	OLF (6%)
	2****	0.28	84.6,277,83.1		CEA (55%)	BLAa (16%)	STR (16%)	LA (11%)
	23**	0.0059	179189104		LSr (62%)	MS (34%)	STR (4%)
	16****	0.0198	159383138	Midbrain, motor related	PAG (86%)	MB (8%)	MRN (5%)	P (2%)
	22***	0.0078	179244126	Thalamus, polymodal association cortex related	PVT (69%)	MD (23%)	PT (5%)	CM (2%)
	25****	0.0041	182,297,81.2	Hypothalamus	PH (99%)
	28****	0.0033	165,259,73.3		PVHd (76%)	AHN (16%)	HY (8%)
	5****	0.1936	158,268,34.8		LZ (35%)	PVZ (30%)	HY (21%)	MEZ (3%)
	15****	0.0235	178,249,78.2		PVH (62%)	RE (20%)	HY (8%)	TH (8%)
	20****	0.0095	182,234,48.7		PVpo (78%)	SBPV (12%)	PVa (8%)	MPN (1%)
	35*	0.002	172,398,65	Pons, motor related	PRNc (87%)	GRN (13%)
	3****	0.2164	138381110	Pons	P (41%)	MV (28%)	SLC (14%)	LC (9%)
	17****	0.0138	152403112		P (77%)	PPN (9%)	CUN (8%)	MB (4%)
	10****	0.0619	120424104	Medulla, sensory related	DCO (43%)	MY (20%)	SPIV (10%)	x (8%)
	6***	0.1906	141,420,52.8	Medulla, motor related	PARN (25%)	IRN (23%)	VII (23%)	SOC (10%)
	27**	0.0033	142418108		LAV (81%)	MV (17%)	MY (2%)
	11****	0.0616	175,446,91.1		MV (25%)	MY (23%)	DMX (19%)	XII (14%)
	34*	0.0021	152,450,62.7		IRN (91%)	LIN (9%)
	Control < Isoflurane (q < 0.01)
	Cluster	Volume	CoG	~Region	Top_Region_1	Top_Region_2	Top_Region_3	Top_Region_4
	14**	0.013	58.7,255,84.5	Cortical subplate	EPd (77%)	AIp6a (18%)	AIp6b (3%)	LA (1%)
	21*	0.0071	145161116	Olfactory	OLF (53%)	CP (19%)	ORBl6a (17%)	ORBl6b (6%)
	33**	0.0035	62.4,233,85.7	Agranular insula	AIp6a (38%)	EPd (29%)	CLA (25%)	CP (9%)
	12****	0.0196	34.1,363,156	Ectorhinal	ECT2/3 (80%)	ECT5 (20%)
	32**	0.0038	45.8,371,170		ECT2/3 (93%)	ECT5 (6%)	ENTl2 (1%)
	15***	0.0117	57.1,376,192	Visual	VISpl1 (52%)	VISpl2/3 (46%)	ECT2/3 (2%)
	30*	0.0044	182166142	Anterior cingulate	ACAv1 (39%)	ILA1 (33%)	ACAv2/3 (24%)	ILA2/3 (4%)
	24*	0.0059	147351214	Retrosplenial	RSPd5 (52%)	RSPd2/3 (41%)	RSPv5 (5%)	RSPd1 (2%)
	13***	0.0148	86351129	Hippocampal	DG-mo (52%)	PRE (48%)
	41**	0.0022	76.8,340,171		CA1 (54%)	SUB (46%)
	34*	0.0035	182198164		IG (95%)	ACAv2/3 (4%)	ACAv1 (1%)
	1****	4.009	91.4,295,65.2	Cortical plate	CTXpl (52%)	STR (16%)	CTXsp (14%)	HY (12%)
	5****	0.1342	147,211,99.4	Pallidum	BST (67%)	STR (13%)	CP (10%)	LSv (5%)
	7*	0.0561	151,157,88.9	Striatum	ACB (59%)	AON (36%)	OLF (5%)
	26***	0.0052	159192119		LSr (67%)	MS (29%)	STR (5%)
	10***	0.0224	178188103		LSr (99%)	STR (1%)
	31**	0.0043	184344128	Midbrain, behavioral state related	RL (40%)	MB (37%)	EW (16%)	III (7%)
	39*	0.0022	183347170	Midbrain, motor related	PAG (100%)
	27**	0.0048	182369173		PAG (100%)
	43****	0.0018	139333100		SNr (90%)	SNc (8%)	MB (2%)
	40**	0.0022	133341106		SNr (70%)	MB (30%)
	28**	0.0047	181381197	Midbrain	MB (71%)	PAG (28%)
	37***	0.0024	167230107	Thalamus, polymodal association cortex related	PT (94%)	TH (4%)	IAD (2%)
	4****	0.1541	172,245,88.1		MTN (30%)	PVH (23%)	HY (15%)	BST (12%)
	18****	0.0085	182,297,80.8	Hypothalamus	PH (96%)	HY (4%)
	38***	0.0024	157,229,45.3		MPO (92%)	AHN (7%)
	8***	0.0487	179,234,45.4		PVpo (43%)	SBPV (17%)	HY (11%)	SCH (10%)
	2***	0.8027	139395108	Pons	P (46%)	MY (32%)	MBmot (10%)	PPN (6%)
	9*	0.0234	159,461,49.9	Medulla, motor related	MDRNv (46%)	IRN (25%)	LRNm (24%)	GRN (5%)
	11**	0.0214	178,443,59		GRN (100%)
	3**	0.5702	142,419,52.6		MY-mot (62%)	MY-sen (20%)	MY (18%)
	6****	0.12	176,449,90.4		MY-mot (64%)	MY (10%)	SOC (9%)	PRNc (7%)
	23*	0.0059	106,469,79.5	Medulla	MY (84%)	SPVI (16%)
	42*	0.0022	126,458,33.8		MY (100%)
	Control < Isoflurane (q < 0.05)
	Cluster	Volume	CoG	~Region	Top_Region_1	Top_Region_2	Top_Region_3	Top_Region_4
	8*	0.0701	172416210	General region not found	CUL4, 5 (82%)	ICe (11%)	ICd (4%)	MB (2%)
	19*	0.012	129,127,78.8	Olfactory	AON (100%)
	43*	0.0023	147114135		AOBgl (94%)	ORBl1 (5%)
	4**	0.2754	42.7,365,169	Ectorhinal	ECT (47%)	TEa (22%)	RHP (16%)	VIS (14%)
	26*	0.0093	153227233	Motor	MOp1 (75%)	MOp2/3 (25%)
	42**	0.0029	159196171	Anterior cingulate	ACAv6b (73%)	ACAv6a (20%)	ACAd6a (4%)	ACAd6b (4%)
	9*	0.0684	149349217	Retrosplenial	RSPd (63%)	RSPv (30%)	RSPagl (7%)
	18***	0.0123	181276181	Hippocampal	FC (86%)	CA1 (14%)
	39**	0.0032	75.4,322,167		CA1 (100%)
	1***	14.8804	98.8,277,78	Cortical plate	CTXpl (48%)	STR (21%)	HY (11%)	CTXsp (11%)
	6*	0.112	117220156	Striatum	CP (89%)	SEZ (11%)
	7**	0.0764	55.7,400,86.2	Cerebellar cortex	PFL (89%)	FL (10%)
	33****	0.005	182,339,85.9	Midbrain, behavioral state related	IPN (100%)
	3***	0.2781	174366177	Midbrain, motor related	PAG (74%)	MB (10%)	SCiw (8%)	SCdg (3%)
	12**	0.0222	183345125	Midbrain	MB (36%)	RL (23%)	CLI (13%)	III (11%)
	20*	0.0111	95.2,278,122	Thalamus, polymodal association cortex related	RT (97%)	TH (2%)	LGv (1%)
	11**	0.026	183,372,97.6	Pons, behavioral state related	CS (64%)	RPO (19%)	MB (14%)	IPN (1%)
	2**	6.5852	143,422,81.4	Medulla	MY (59%)	P (20%)	HEM (6%)	MBmot (3%)
	Control < Isoflurane (q < 0.1)
	Cluster	Volume	CoG	~Region	Top_Region_1	Top_Region_2	Top_Region_3	Top_Region_4
	21*	0.0098	147113136	Olfactory	AOBgl (79%)	ORBl1 (13%)	OLF (3%)	ORBvl1 (3%)
	34**	0.0049	183134176	Prelimbic	PL1 (100%)
	41*	0.0035	86.3,157,88.4	Agranular insula	AIv2/3 (100%)
	12*	0.0238	154226233	Motor	MOp1 (60%)	MOp2/3 (32%)	MOs1 (4%)	MOs2/3 (3%)
	5**	0.1325	148349216	Retrosplenial	RSPd (57%)	RSPv (31%)	RSPagl (12%)
	14***	0.0187	181277181	Hippocampal	FC (79%)	CA1 (18%)	HPF (3%)
	1**	33.2849	111,319,88.3	Cerebral cortex	CTX (39%)	CNU (21%)	HB (20%)	IB (8%)
	31*	0.0055	106460149	Cerebellar cortex	PRM (99%)
	18***	0.0135	182,339,86	Midbrain, behavioral state related	IPN (100%)
	2***	0.514	171365178	Midbrain, motor related	PAG (61%)	SCiw (12%)	MB (10%)	SCdg (6%)
	8**	0.0444	183343124	Midbrain	MB (36%)	RAmb (34%)	PAG (9%)	III (8%)
	Control < Isoflurane (q < 0.15)
	Cluster	Volume	CoG	~Region	Top_Region_1	Top_Region_2	Top_Region_3	Top_Region_4
	29*	0.0035	140,73.9,155	Olfactory	MOB (100%)
	9*	0.0184	147112136		AOBgl (67%)	ORBl1 (16%)	AOBmi (8%)	OLF (5%)
	7***	0.0232	181278181	Hippocampal	FC (74%)	CA1 (21%)	HPF (5%)
	1**	43.0499	114,317,94.9	Cerebral cortex	CTX (37%)	CNU (21%)	HB (18%)	CBX (11%)
	16**	0.0066	178486168	Cerebellar cortex	PYR (63%)	FOTU (37%)

## Sheet: Control > Iso | cell densities
condition	sample	q_value	cluster_ID	pooled_cell_count	pooled_cluster_volume	cell_density
Control	sample01	0.05	1	76155	2.74891	27703.8
Control	sample01	0.05	2	16943	0.769502	22018.1
Control	sample01	0.05	3	22843	0.690188	33096.8
Control	sample01	0.05	4	8600	0.784099	10968
Control	sample01	0.05	5	15648	0.42019	37240.3
Control	sample01	0.05	6	1565	0.375883	4163.53
Control	sample01	0.05	7	435	0.369297	1177.91
Control	sample01	0.05	8	13888	0.6751	20571.8
Control	sample01	0.05	9	7894	0.310373	25434
Control	sample01	0.05	10	4998	0.202511	24680.1
Control	sample01	0.05	11	2518	0.191636	13139.5
Control	sample01	0.05	12	1843	0.131882	13974.6
Control	sample01	0.05	13	1619	0.0968758	16712.1
Control	sample01	0.05	14	935	0.055816	16751.5
Control	sample01	0.05	15	1665	0.113319	14693
Control	sample01	0.05	16	1065	0.106491	10000.9
Control	sample01	0.05	17	1547	0.102397	15107.8
Control	sample01	0.05	18	865	0.0795075	10879.5
Control	sample01	0.05	19	284	0.0256223	11084.1
Control	sample01	0.05	20	524	0.03936	13313
Control	sample01	0.05	21	206	0.0113902	18085.7
Control	sample01	0.05	22	73	0.00835059	8741.9
Control	sample01	0.05	23	173	0.0108498	15945
Control	sample01	0.05	24	151	0.00691462	21837.8
Control	sample02	0.05	1	48897	2.40801	20305.9
Control	sample02	0.05	2	10142	0.69738	14543
Control	sample02	0.05	3	17900	0.656876	27250.2
Control	sample02	0.05	4	3319	0.674674	4919.41
Control	sample02	0.05	5	14208	0.425896	33360.3
Control	sample02	0.05	6	1690	0.330036	5120.65
Control	sample02	0.05	7	3160	0.354219	8921.03
Control	sample02	0.05	8	12532	0.543195	23070.9
Control	sample02	0.05	9	7079	0.26541	26671.9
Control	sample02	0.05	10	4065	0.193497	21008.1
Control	sample02	0.05	11	2713	0.179122	15146.1
Control	sample02	0.05	12	614	0.0996365	6162.4
Control	sample02	0.05	13	1647	0.0949336	17349
Control	sample02	0.05	14	733	0.05927	12367.1
Control	sample02	0.05	15	893	0.11755	7596.78
Control	sample02	0.05	16	357	0.0695098	5135.97
Control	sample02	0.05	17	1247	0.0867779	14370
Control	sample02	0.05	18	1077	0.082502	13054.2
Control	sample02	0.05	19	111	0.0237997	4663.93
Control	sample02	0.05	20	457	0.0297908	15340.3
Control	sample02	0.05	21	97	0.0107996	8981.8
Control	sample02	0.05	22	96	0.00656922	14613.6
Control	sample02	0.05	23	56	0.00510739	10964.5
Control	sample02	0.05	24	169	0.00558061	30283.4
Control	sample05	0.05	1	102969	2.65114	38839.6
Control	sample05	0.05	2	17000	0.75962	22379.6
Control	sample05	0.05	3	24296	0.717826	33846.6
Control	sample05	0.05	4	22043	0.693536	31783.5
Control	sample05	0.05	5	17267	0.532604	32419.9
Control	sample05	0.05	6	6289	0.390906	16088.2
Control	sample05	0.05	7	14667	0.39679	36964.1
Control	sample05	0.05	8	16777	0.638009	26295.9
Control	sample05	0.05	9	8507	0.297103	28633.2
Control	sample05	0.05	10	4881	0.13665	35718.9
Control	sample05	0.05	11	5779	0.210004	27518.5
Control	sample05	0.05	12	5244	0.114088	45964.4
Control	sample05	0.05	13	2240	0.102556	21841.8
Control	sample05	0.05	14	853	0.0407618	20926.5
Control	sample05	0.05	15	2450	0.139916	17510.5
Control	sample05	0.05	16	987	0.0380511	25938.8
Control	sample05	0.05	17	3343	0.101831	32829
Control	sample05	0.05	18	1484	0.128991	11504.7
Control	sample05	0.05	19	817	0.0257138	31772.8
Control	sample05	0.05	20	1010	0.0533851	18919.1
Control	sample05	0.05	21	386	0.0130512	29575.8
Control	sample05	0.05	22	165	0.00615898	26790.2
Control	sample05	0.05	23	147	0.00407002	36117.8
Control	sample05	0.05	24	207	0.00472896	43772.8
Control	sample06	0.05	1	127798	2.76682	46189.5
Control	sample06	0.05	2	18236	0.764331	23858.8
Control	sample06	0.05	3	35492	0.814274	43587.3
Control	sample06	0.05	4	11168	0.651321	17146.7
Control	sample06	0.05	5	17857	0.524524	34044.2
Control	sample06	0.05	6	1843	0.288677	6384.29
Control	sample06	0.05	7	5011	0.373051	13432.5
Control	sample06	0.05	8	16480	0.671312	24548.9
Control	sample06	0.05	9	9371	0.299819	31255.5
Control	sample06	0.05	10	6233	0.204198	30524.3
Control	sample06	0.05	11	4578	0.157414	29082.6
Control	sample06	0.05	12	4432	0.122073	36306.1
Control	sample06	0.05	13	1898	0.0990584	19160.4
Control	sample06	0.05	14	1092	0.0643241	16976.5
Control	sample06	0.05	15	1995	0.10667	18702.6
Control	sample06	0.05	16	2298	0.136181	16874.7
Control	sample06	0.05	17	2419	0.0782187	30926.1
Control	sample06	0.05	18	1492	0.0851712	17517.7
Control	sample06	0.05	19	669	0.0297364	22497.6
Control	sample06	0.05	20	737	0.0414301	17789
Control	sample06	0.05	21	306	0.0101117	30261.8
Control	sample06	0.05	22	63	0.009432	6679.39
Control	sample06	0.05	23	269	0.01123	23953.7
Control	sample06	0.05	24	185	0.00440941	41955.7
Control	sample08	0.05	1	75226	2.5532	29463.4
Control	sample08	0.05	2	16596	0.75889	21868.8
Control	sample08	0.05	3	21882	0.697748	31360.9
Control	sample08	0.05	4	17455	0.566763	30797.7
Control	sample08	0.05	5	16638	0.503212	33063.6
Control	sample08	0.05	6	10781	0.315618	34158.4
Control	sample08	0.05	7	4499	0.372742	12070
Control	sample08	0.05	8	15227	0.610783	24930.3
Control	sample08	0.05	9	7509	0.290047	25888.9
Control	sample08	0.05	10	4503	0.207066	21746.6
Control	sample08	0.05	11	3461	0.161531	21426.2
Control	sample08	0.05	12	2484	0.115672	21474.5
Control	sample08	0.05	13	1848	0.0891887	20720.1
Control	sample08	0.05	14	791	0.0742103	10658.9
Control	sample08	0.05	15	2584	0.12617	20480.3
Control	sample08	0.05	16	2482	0.101146	24538.8
Control	sample08	0.05	17	1747	0.0822711	21234.7
Control	sample08	0.05	18	1140	0.084471	13495.8
Control	sample08	0.05	19	566	0.0284452	19897.9
Control	sample08	0.05	20	413	0.0280236	14737.6
Control	sample08	0.05	21	149	0.0119104	12510.1
Control	sample08	0.05	22	213	0.00759002	28063.2
Control	sample08	0.05	23	216	0.0094055	22965.3
Control	sample08	0.05	24	101	0.00395021	25568.3
Control	sample09	0.05	1	64123	2.75355	23287.4
Control	sample09	0.05	2	18922	0.707745	26735.6
Control	sample09	0.05	3	23032	0.683717	33686.4
Control	sample09	0.05	4	12020	0.654988	18351.5
Control	sample09	0.05	5	19287	0.562012	34317.8
Control	sample09	0.05	6	6176	0.356654	17316.5
Control	sample09	0.05	7	7201	0.355391	20262.2
Control	sample09	0.05	8	17983	0.632484	28432.3
Control	sample09	0.05	9	10541	0.324345	32499.4
Control	sample09	0.05	10	3654	0.157133	23254.1
Control	sample09	0.05	11	2932	0.204724	14321.7
Control	sample09	0.05	12	2184	0.122828	17781
Control	sample09	0.05	13	1542	0.0901297	17108.7
Control	sample09	0.05	14	512	0.0649436	7883.77
Control	sample09	0.05	15	1559	0.0994887	15670.1
Control	sample09	0.05	16	964	0.133751	7207.42
Control	sample09	0.05	17	1624	0.0844447	19231.5
Control	sample09	0.05	18	1142	0.087151	13103.7
Control	sample09	0.05	19	443	0.0307144	14423.2
Control	sample09	0.05	20	349	0.0216712	16104.3
Control	sample09	0.05	21	175	0.0104196	16795.3
Control	sample09	0.05	22	145	0.00914733	15851.6
Control	sample09	0.05	23	71	0.0107508	6604.13
Control	sample09	0.05	24	145	0.00438016	33103.8
Control	sample10	0.05	1	143504	2.61068	54968
Control	sample10	0.05	2	20880	0.795727	26240.2
Control	sample10	0.05	3	29620	0.7154	41403.4
Control	sample10	0.05	4	20952	0.622132	33677.7
Control	sample10	0.05	5	20800	0.536934	38738.4
Control	sample10	0.05	6	9093	0.342408	26556.1
Control	sample10	0.05	7	4236	0.32334	13100.8
Control	sample10	0.05	8	17585	0.626941	28048.9
Control	sample10	0.05	9	9191	0.30207	30426.8
Control	sample10	0.05	10	5366	0.172709	31069.6
Control	sample10	0.05	11	7780	0.197402	39412
Control	sample10	0.05	12	2128	0.112433	18926.8
Control	sample10	0.05	13	2779	0.0800518	34715
Control	sample10	0.05	14	1474	0.0648209	22739.6
Control	sample10	0.05	15	3531	0.129839	27195.3
Control	sample10	0.05	16	1967	0.0775042	25379.3
Control	sample10	0.05	17	2858	0.0835265	34216.7
Control	sample10	0.05	18	1078	0.0847651	12717.5
Control	sample10	0.05	19	1008	0.0273551	36848.7
Control	sample10	0.05	20	888	0.030832	28801.2
Control	sample10	0.05	21	280	0.010734	26085.3
Control	sample10	0.05	22	255	0.00961594	26518.5
Control	sample10	0.05	23	256	0.00812	31527.1
Control	sample10	0.05	24	178	0.00409978	43417
Isoflurane	sample11	0.05	1	16764	2.17567	7705.22
Isoflurane	sample11	0.05	2	1573	0.635304	2475.98
Isoflurane	sample11	0.05	3	8474	0.667186	12701.1
Isoflurane	sample11	0.05	4	1698	0.617505	2749.78
Isoflurane	sample11	0.05	5	7319	0.494532	14799.9
Isoflurane	sample11	0.05	6	150	0.302729	495.493
Isoflurane	sample11	0.05	7	245	0.319368	767.141
Isoflurane	sample11	0.05	8	4651	0.45449	10233.4
Isoflurane	sample11	0.05	9	2051	0.242139	8470.36
Isoflurane	sample11	0.05	10	1054	0.162595	6482.37
Isoflurane	sample11	0.05	11	1211	0.173736	6970.36
Isoflurane	sample11	0.05	12	261	0.113001	2309.72
Isoflurane	sample11	0.05	13	164	0.0722929	2268.55
Isoflurane	sample11	0.05	14	239	0.0507234	4711.83
Isoflurane	sample11	0.05	15	148	0.0839841	1762.24
Isoflurane	sample11	0.05	16	146	0.0748212	1951.32
Isoflurane	sample11	0.05	17	356	0.0782684	4548.45
Isoflurane	sample11	0.05	18	247	0.0750992	3288.98
Isoflurane	sample11	0.05	19	188	0.0224865	8360.59
Isoflurane	sample11	0.05	20	155	0.0233738	6631.37
Isoflurane	sample11	0.05	21	23	0.0105294	2184.36
Isoflurane	sample11	0.05	22	8	0.00644282	1241.69
Isoflurane	sample11	0.05	23	5	0.00606163	824.86
Isoflurane	sample11	0.05	24	23	0.00391443	5875.69
Isoflurane	sample12	0.05	1	19375	2.31217	8379.57
Isoflurane	sample12	0.05	2	3244	0.654108	4959.43
Isoflurane	sample12	0.05	3	7793	0.701452	11109.8
Isoflurane	sample12	0.05	4	1899	0.598732	3171.7
Isoflurane	sample12	0.05	5	5572	0.532666	10460.6
Isoflurane	sample12	0.05	6	263	0.320745	819.965
Isoflurane	sample12	0.05	7	845	0.332393	2542.17
Isoflurane	sample12	0.05	8	6632	0.559721	11848.8
Isoflurane	sample12	0.05	9	2436	0.25546	9535.73
Isoflurane	sample12	0.05	10	1564	0.184905	8458.4
Isoflurane	sample12	0.05	11	1146	0.148175	7734.11
Isoflurane	sample12	0.05	12	448	0.129183	3467.94
Isoflurane	sample12	0.05	13	387	0.0889071	4352.86
Isoflurane	sample12	0.05	14	314	0.0611027	5138.89
Isoflurane	sample12	0.05	15	190	0.11127	1707.57
Isoflurane	sample12	0.05	16	103	0.080675	1276.73
Isoflurane	sample12	0.05	17	737	0.0873219	8440.03
Isoflurane	sample12	0.05	18	236	0.0724915	3255.55
Isoflurane	sample12	0.05	19	210	0.0188122	11163
Isoflurane	sample12	0.05	20	375	0.0268516	13965.7
Isoflurane	sample12	0.05	21	30	0.010031	2990.74
Isoflurane	sample12	0.05	22	14	0.00652019	2147.18
Isoflurane	sample12	0.05	23	15	0.00678298	2211.42
Isoflurane	sample12	0.05	24	45	0.0103604	4343.47
Isoflurane	sample13	0.05	1	19022	2.51709	7557.13
Isoflurane	sample13	0.05	2	5160	0.691192	7465.36
Isoflurane	sample13	0.05	3	3282	0.653639	5021.12
Isoflurane	sample13	0.05	4	1955	0.601486	3250.28
Isoflurane	sample13	0.05	5	8875	0.499198	17778.5
Isoflurane	sample13	0.05	6	257	0.323516	794.396
Isoflurane	sample13	0.05	7	475	0.352417	1347.84
Isoflurane	sample13	0.05	8	5309	0.610908	8690.35
Isoflurane	sample13	0.05	9	1150	0.246858	4658.54
Isoflurane	sample13	0.05	10	1660	0.191869	8651.72
Isoflurane	sample13	0.05	11	1483	0.138747	10688.5
Isoflurane	sample13	0.05	12	366	0.0974022	3757.61
Isoflurane	sample13	0.05	13	507	0.0749676	6762.93
Isoflurane	sample13	0.05	14	399	0.0565216	7059.25
Isoflurane	sample13	0.05	15	332	0.114736	2893.61
Isoflurane	sample13	0.05	16	283	0.091517	3092.32
Isoflurane	sample13	0.05	17	676	0.0875811	7718.56
Isoflurane	sample13	0.05	18	371	0.0809858	4581.05
Isoflurane	sample13	0.05	19	148	0.0244432	6054.85
Isoflurane	sample13	0.05	20	479	0.0380634	12584.3
Isoflurane	sample13	0.05	21	89	0.0120278	7399.54
Isoflurane	sample13	0.05	22	10	0.00705094	1418.25
Isoflurane	sample13	0.05	23	37	0.0111692	3312.68
Isoflurane	sample13	0.05	24	61	0.00377043	16178.5
Isoflurane	sample14	0.05	1	60253	2.74298	21966.3
Isoflurane	sample14	0.05	2	6866	0.790448	8686.22
Isoflurane	sample14	0.05	3	8608	0.718032	11988.3
Isoflurane	sample14	0.05	4	5551	0.72202	7688.16
Isoflurane	sample14	0.05	5	12105	0.560907	21581.1
Isoflurane	sample14	0.05	6	316	0.336195	939.93
Isoflurane	sample14	0.05	7	1476	0.333222	4429.48
Isoflurane	sample14	0.05	8	9525	0.650544	14641.6
Isoflurane	sample14	0.05	9	5258	0.326023	16127.7
Isoflurane	sample14	0.05	10	2337	0.182059	12836.5
Isoflurane	sample14	0.05	11	2803	0.156581	17901.3
Isoflurane	sample14	0.05	12	763	0.128409	5941.97
Isoflurane	sample14	0.05	13	762	0.0957434	7958.77
Isoflurane	sample14	0.05	14	335	0.061327	5462.52
Isoflurane	sample14	0.05	15	1296	0.116642	11110.9
Isoflurane	sample14	0.05	16	562	0.0945307	5945.16
Isoflurane	sample14	0.05	17	1694	0.0958818	17667.6
Isoflurane	sample14	0.05	18	579	0.0932113	6211.7
Isoflurane	sample14	0.05	19	599	0.0313301	19119
Isoflurane	sample14	0.05	20	428	0.0347388	12320.5
Isoflurane	sample14	0.05	21	171	0.0122708	13935.5
Isoflurane	sample14	0.05	22	25	0.00959072	2606.69
Isoflurane	sample14	0.05	23	102	0.0109794	9290.13
Isoflurane	sample14	0.05	24	118	0.00453082	26043.9
Isoflurane	sample16	0.05	1	13685	2.63995	5183.82
Isoflurane	sample16	0.05	2	3879	0.782609	4956.5
Isoflurane	sample16	0.05	3	5090	0.597097	8524.58
Isoflurane	sample16	0.05	4	1354	0.566066	2391.95
Isoflurane	sample16	0.05	5	9637	0.552901	17429.9
Isoflurane	sample16	0.05	6	210	0.351427	597.564
Isoflurane	sample16	0.05	7	193	0.335099	575.949
Isoflurane	sample16	0.05	8	3883	0.524435	7404.16
Isoflurane	sample16	0.05	9	3553	0.291986	12168.4
Isoflurane	sample16	0.05	10	2765	0.192556	14359.4
Isoflurane	sample16	0.05	11	1059	0.13293	7966.62
Isoflurane	sample16	0.05	12	285	0.115854	2459.99
Isoflurane	sample16	0.05	13	986	0.102337	9634.83
Isoflurane	sample16	0.05	14	430	0.0629618	6829.54
Isoflurane	sample16	0.05	15	226	0.113071	1998.74
Isoflurane	sample16	0.05	16	153	0.0753971	2029.26
Isoflurane	sample16	0.05	17	471	0.0888729	5299.7
Isoflurane	sample16	0.05	18	778	0.0784868	9912.49
Isoflurane	sample16	0.05	19	56	0.0262927	2129.87
Isoflurane	sample16	0.05	20	237	0.0255704	9268.52
Isoflurane	sample16	0.05	21	86	0.0104513	8228.67
Isoflurane	sample16	0.05	22	9	0.00672218	1338.85
Isoflurane	sample16	0.05	23	31	0.00673056	4605.86
Isoflurane	sample16	0.05	24	54	0.00440038	12271.7
Isoflurane	sample17	0.05	1	35677	2.39225	14913.6
Isoflurane	sample17	0.05	2	5691	0.765608	7433.3
Isoflurane	sample17	0.05	3	15413	0.671784	22943.4
Isoflurane	sample17	0.05	4	2684	0.570194	4707.17
Isoflurane	sample17	0.05	5	15973	0.618726	25815.9
Isoflurane	sample17	0.05	6	477	0.308895	1544.21
Isoflurane	sample17	0.05	7	1743	0.366761	4752.41
Isoflurane	sample17	0.05	8	6949	0.512538	13558
Isoflurane	sample17	0.05	9	7215	0.287678	25080.2
Isoflurane	sample17	0.05	10	4198	0.162592	25819.2
Isoflurane	sample17	0.05	11	538	0.121254	4436.96
Isoflurane	sample17	0.05	12	1404	0.111694	12570.1
Isoflurane	sample17	0.05	13	1071	0.0961343	11140.7
Isoflurane	sample17	0.05	14	619	0.0644815	9599.65
Isoflurane	sample17	0.05	15	240	0.0926424	2590.61
Isoflurane	sample17	0.05	16	427	0.0784666	5441.81
Isoflurane	sample17	0.05	17	585	0.0906861	6450.82
Isoflurane	sample17	0.05	18	1203	0.0815888	14744.7
Isoflurane	sample17	0.05	19	163	0.0273848	5952.2
Isoflurane	sample17	0.05	20	321	0.0263519	12181.3
Isoflurane	sample17	0.05	21	113	0.010359	10908.4
Isoflurane	sample17	0.05	22	3	0.00661984	453.183
Isoflurane	sample17	0.05	23	29	0.00730144	3971.82
Isoflurane	sample17	0.05	24	101	0.00400998	25187.1
Isoflurane	sample18	0.05	1	10831	2.20664	4908.36
Isoflurane	sample18	0.05	2	2542	0.640898	3966.31
Isoflurane	sample18	0.05	3	8367	0.641462	13043.6
Isoflurane	sample18	0.05	4	694	0.579585	1197.41
Isoflurane	sample18	0.05	5	5308	0.551067	9632.22
Isoflurane	sample18	0.05	6	292	0.287363	1016.14
Isoflurane	sample18	0.05	7	591	0.354659	1666.39
Isoflurane	sample18	0.05	8	5847	0.513839	11379.1
Isoflurane	sample18	0.05	9	2087	0.256017	8151.8
Isoflurane	sample18	0.05	10	2589	0.170585	15177.2
Isoflurane	sample18	0.05	11	342	0.161354	2119.57
Isoflurane	sample18	0.05	12	390	0.122201	3191.47
Isoflurane	sample18	0.05	13	634	0.0775091	8179.69
Isoflurane	sample18	0.05	14	308	0.0511118	6026
Isoflurane	sample18	0.05	15	74	0.108518	681.912
Isoflurane	sample18	0.05	16	113	0.102085	1106.92
Isoflurane	sample18	0.05	17	212	0.079563	2664.55
Isoflurane	sample18	0.05	18	540	0.0749578	7204.06
Isoflurane	sample18	0.05	19	21	0.0225906	929.591
Isoflurane	sample18	0.05	20	154	0.0267436	5758.38
Isoflurane	sample18	0.05	21	24	0.00983238	2440.91
Isoflurane	sample18	0.05	22	10	0.00830445	1204.17
Isoflurane	sample18	0.05	23	26	0.00914976	2841.6
Isoflurane	sample18	0.05	24	50	0.00393939	12692.3
Isoflurane	sample19	0.05	1	24114	2.5682	9389.44
Isoflurane	sample19	0.05	2	4306	0.729204	5905.07
Isoflurane	sample19	0.05	3	8961	0.704525	12719.2
Isoflurane	sample19	0.05	4	1426	0.651798	2187.79
Isoflurane	sample19	0.05	5	11262	0.574029	19619.2
Isoflurane	sample19	0.05	6	221	0.359601	614.569
Isoflurane	sample19	0.05	7	975	0.331335	2942.64
Isoflurane	sample19	0.05	8	6877	0.57592	11940.9
Isoflurane	sample19	0.05	9	5564	0.295324	18840.3
Isoflurane	sample19	0.05	10	4840	0.167742	28853.9
Isoflurane	sample19	0.05	11	1139	0.13938	8171.91
Isoflurane	sample19	0.05	12	1190	0.121481	9795.77
Isoflurane	sample19	0.05	13	1042	0.0940049	11084.5
Isoflurane	sample19	0.05	14	682	0.0574307	11875.2
Isoflurane	sample19	0.05	15	340	0.151314	2246.98
Isoflurane	sample19	0.05	16	174	0.101067	1721.63
Isoflurane	sample19	0.05	17	508	0.0967697	5249.58
Isoflurane	sample19	0.05	18	668	0.0796706	8384.52
Isoflurane	sample19	0.05	19	195	0.0264756	7365.28
Isoflurane	sample19	0.05	20	472	0.0195004	24204.7
Isoflurane	sample19	0.05	21	138	0.0100992	13664.4
Isoflurane	sample19	0.05	22	10	0.00911424	1097.18
Isoflurane	sample19	0.05	23	17	0.00942298	1804.1
Isoflurane	sample19	0.05	24	38	0.00363059	10466.6
Isoflurane	sample20	0.05	1	57415	2.44978	23436.8
Isoflurane	sample20	0.05	2	9744	0.682258	14282
Isoflurane	sample20	0.05	3	17089	0.623571	27405
Isoflurane	sample20	0.05	4	4898	0.526932	9295.32
Isoflurane	sample20	0.05	5	15053	0.496038	30346.4
Isoflurane	sample20	0.05	6	800	0.297589	2688.27
Isoflurane	sample20	0.05	7	1314	0.294531	4461.33
Isoflurane	sample20	0.05	8	11502	0.543992	21143.7
Isoflurane	sample20	0.05	9	5793	0.26741	21663.3
Isoflurane	sample20	0.05	10	3673	0.155638	23599.6
Isoflurane	sample20	0.05	11	3302	0.169943	19430
Isoflurane	sample20	0.05	12	1024	0.122168	8381.93
Isoflurane	sample20	0.05	13	1901	0.0954074	19925.1
Isoflurane	sample20	0.05	14	489	0.0579144	8443.49
Isoflurane	sample20	0.05	15	396	0.100862	3926.17
Isoflurane	sample20	0.05	16	506	0.0946408	5346.53
Isoflurane	sample20	0.05	17	899	0.0795343	11303.3
Isoflurane	sample20	0.05	18	939	0.0668153	14053.7
Isoflurane	sample20	0.05	19	259	0.0256888	10082.2
Isoflurane	sample20	0.05	20	544	0.0224314	24251.8
Isoflurane	sample20	0.05	21	103	0.0109812	9379.68
Isoflurane	sample20	0.05	22	39	0.00878406	4439.86
Isoflurane	sample20	0.05	23	64	0.00784301	8160.13
Isoflurane	sample20	0.05	24	168	0.00364998	46027.6
Control	sample01	0.1	1	185539	7.68305	24149.1
Control	sample01	0.1	2	20987	3.37672	6215.2
Control	sample01	0.1	3	16906	1.86928	9044.11
Control	sample01	0.1	4	28134	1.49163	18861.3
Control	sample01	0.1	5	9737	1.31287	7416.6
Control	sample01	0.1	6	23277	0.625886	37190.5
Control	sample01	0.1	7	9267	0.722214	12831.4
Control	sample01	0.1	8	21116	1.08823	19403.9
Control	sample01	0.1	9	4272	0.377459	11317.8
Control	sample01	0.1	10	1780	0.122381	14544.8
Control	sample01	0.1	11	3048	0.175448	17372.7
Control	sample01	0.1	12	1505	0.114657	13126.1
Control	sample01	0.1	13	819	0.0446334	18349.5
Control	sample01	0.1	14	413	0.0889973	4640.59
Control	sample01	0.1	15	310	0.056242	5511.9
Control	sample01	0.1	16	254	0.0363874	6980.44
Control	sample01	0.1	17	96	0.012146	7903.81
Control	sample01	0.1	18	395	0.0184242	21439.2
Control	sample01	0.1	19	109	0.00615078	17721.3
Control	sample01	0.1	20	127	0.00559936	22681.2
Control	sample01	0.1	21	15	0.00638202	2350.35
Control	sample01	0.1	22	28	0.00291942	9590.93
Control	sample02	0.1	1	137318	7.12703	19267.2
Control	sample02	0.1	2	20035	2.68162	7471.23
Control	sample02	0.1	3	8089	1.59667	5066.16
Control	sample02	0.1	4	16758	1.4195	11805.6
Control	sample02	0.1	5	11241	1.22504	9175.99
Control	sample02	0.1	6	20570	0.631514	32572.5
Control	sample02	0.1	7	8233	0.633237	13001.5
Control	sample02	0.1	8	20020	0.886922	22572.4
Control	sample02	0.1	9	4288	0.322539	13294.5
Control	sample02	0.1	10	1520	0.129529	11734.8
Control	sample02	0.1	11	3133	0.172215	18192.4
Control	sample02	0.1	12	1146	0.0868026	13202.4
Control	sample02	0.1	13	424	0.0397731	10660.5
Control	sample02	0.1	14	447	0.0656198	6811.97
Control	sample02	0.1	15	266	0.0494472	5379.47
Control	sample02	0.1	16	333	0.0275788	12074.5
Control	sample02	0.1	17	83	0.0110524	7509.67
Control	sample02	0.1	18	341	0.0144992	23518.5
Control	sample02	0.1	19	54	0.00504083	10712.5
Control	sample02	0.1	20	2	0.00292019	684.886
Control	sample02	0.1	21	35	0.00324122	10798.4
Control	sample02	0.1	22	19	0.00312064	6088.49
Control	sample05	0.1	1	259410	7.66546	33841.4
Control	sample05	0.1	2	58916	2.68764	21921.1
Control	sample05	0.1	3	46739	1.64326	28442.8
Control	sample05	0.1	4	31161	1.59435	19544.7
Control	sample05	0.1	5	41544	1.44303	28789.4
Control	sample05	0.1	6	24114	0.793926	30373.1
Control	sample05	0.1	7	21420	0.698617	30660.6
Control	sample05	0.1	8	26337	1.05061	25068.2
Control	sample05	0.1	9	9921	0.393126	25236.2
Control	sample05	0.1	10	1677	0.0926332	18103.7
Control	sample05	0.1	11	3686	0.180681	20400.5
Control	sample05	0.1	12	2766	0.157556	17555.6
Control	sample05	0.1	13	1304	0.046734	27902.6
Control	sample05	0.1	14	1960	0.0661132	29646.1
Control	sample05	0.1	15	1286	0.0353501	36379
Control	sample05	0.1	16	1127	0.0284123	39665.9
Control	sample05	0.1	17	99	0.00919162	10770.7
Control	sample05	0.1	18	497	0.0115219	43135.2
Control	sample05	0.1	19	56	0.00497094	11265.5
Control	sample05	0.1	20	80	0.00463078	17275.7
Control	sample05	0.1	21	106	0.00482874	21951.9
Control	sample05	0.1	22	54	0.00276122	19556.6
Control	sample06	0.1	1	314053	8.0372	39074.9
Control	sample06	0.1	2	33935	3.12693	10852.5
Control	sample06	0.1	3	27200	1.6319	16667.7
Control	sample06	0.1	4	32145	1.49059	21565.3
Control	sample06	0.1	5	26322	1.35538	19420.4
Control	sample06	0.1	6	27500	0.773298	35562
Control	sample06	0.1	7	18838	0.648133	29065
Control	sample06	0.1	8	26390	1.09969	23997.6
Control	sample06	0.1	9	7799	0.294654	26468.3
Control	sample06	0.1	10	1986	0.13963	14223.3
Control	sample06	0.1	11	3738	0.173718	21517.7
Control	sample06	0.1	12	1998	0.121168	16489.5
Control	sample06	0.1	13	1394	0.0406822	34265.6
Control	sample06	0.1	14	1553	0.06201	25044.3
Control	sample06	0.1	15	384	0.052617	7298.02
Control	sample06	0.1	16	1007	0.032438	31043.9
Control	sample06	0.1	17	195	0.0109712	17773.8
Control	sample06	0.1	18	571	0.0124986	45685
Control	sample06	0.1	19	157	0.00631296	24869.5
Control	sample06	0.1	20	174	0.00697178	24957.8
Control	sample06	0.1	21	12	0.0028288	4242.08
Control	sample06	0.1	22	93	0.00394259	23588.5
Control	sample08	0.1	1	200512	7.57349	26475.5
Control	sample08	0.1	2	85942	3.19092	26933.3
Control	sample08	0.1	3	37383	1.41398	26438.2
Control	sample08	0.1	4	31329	1.52298	20570.9
Control	sample08	0.1	5	17367	1.321	13146.9
Control	sample08	0.1	6	23625	0.751014	31457.5
Control	sample08	0.1	7	11992	0.618488	19389.2
Control	sample08	0.1	8	24292	1.01758	23872.2
Control	sample08	0.1	9	6805	0.317367	21442.1
Control	sample08	0.1	10	1468	0.159054	9229.58
Control	sample08	0.1	11	3425	0.153426	22323.4
Control	sample08	0.1	12	1155	0.0871473	13253.4
Control	sample08	0.1	13	583	0.0442904	13163.1
Control	sample08	0.1	14	1757	0.0716038	24537.8
Control	sample08	0.1	15	1650	0.045986	35880.5
Control	sample08	0.1	16	843	0.0291222	28946.9
Control	sample08	0.1	17	129	0.0109728	11756.3
Control	sample08	0.1	18	278	0.0113906	24406.1
Control	sample08	0.1	19	141	0.00568403	24806.3
Control	sample08	0.1	20	149	0.00719219	20716.9
Control	sample08	0.1	21	163	0.00363002	44903.4
Control	sample08	0.1	22	28	0.00355917	7867.01
Control	sample09	0.1	1	171769	7.7232	22240.6
Control	sample09	0.1	2	39309	3.36192	11692.4
Control	sample09	0.1	3	27495	1.62072	16964.7
Control	sample09	0.1	4	30903	1.35528	22802
Control	sample09	0.1	5	21252	1.23889	17154
Control	sample09	0.1	6	27604	0.827321	33365.5
Control	sample09	0.1	7	9486	0.677149	14008.7
Control	sample09	0.1	8	27912	1.04853	26620.2
Control	sample09	0.1	9	5311	0.376302	14113.7
Control	sample09	0.1	10	1079	0.135369	7970.82
Control	sample09	0.1	11	2734	0.159087	17185.6
Control	sample09	0.1	12	956	0.0678423	14091.5
Control	sample09	0.1	13	698	0.04	17450
Control	sample09	0.1	14	708	0.104027	6805.93
Control	sample09	0.1	15	876	0.0446678	19611.5
Control	sample09	0.1	16	201	0.04074	4933.72
Control	sample09	0.1	17	150	0.0109213	13734.6
Control	sample09	0.1	18	325	0.0115892	28043.2
Control	sample09	0.1	19	94	0.00540019	17406.8
Control	sample09	0.1	20	76	0.00537043	14151.6
Control	sample09	0.1	21	174	0.00344019	50578.6
Control	sample09	0.1	22	39	0.00285024	13683.1
Control	sample10	0.1	1	328528	7.43032	44214.5
Control	sample10	0.1	2	86691	3.19003	27175.6
Control	sample10	0.1	3	46102	1.5196	30338.1
Control	sample10	0.1	4	41836	1.60689	26035.3
Control	sample10	0.1	5	17468	1.16779	14958.2
Control	sample10	0.1	6	30042	0.792276	37918.6
Control	sample10	0.1	7	21129	0.640224	33002.5
Control	sample10	0.1	8	27751	1.0384	26724.7
Control	sample10	0.1	9	12931	0.352862	36646
Control	sample10	0.1	10	2700	0.137903	19578.9
Control	sample10	0.1	11	5083	0.139752	36371.5
Control	sample10	0.1	12	2205	0.090282	24423.5
Control	sample10	0.1	13	1048	0.0393697	26619.5
Control	sample10	0.1	14	3704	0.0779958	47489.8
Control	sample10	0.1	15	1189	0.0429044	27712.8
Control	sample10	0.1	16	1368	0.0323888	42236.8
Control	sample10	0.1	17	135	0.0100308	13458.6
Control	sample10	0.1	18	407	0.00986099	41273.7
Control	sample10	0.1	19	98	0.00572902	17105.9
Control	sample10	0.1	20	67	0.00325875	20560
Control	sample10	0.1	21	162	0.00313978	51596
Control	sample10	0.1	22	39	0.0032288	12078.8
Isoflurane	sample11	0.1	1	49505	6.27023	7895.25
Isoflurane	sample11	0.1	2	3425	2.57785	1328.63
Isoflurane	sample11	0.1	3	4464	1.49209	2991.77
Isoflurane	sample11	0.1	4	3647	1.26445	2884.26
Isoflurane	sample11	0.1	5	2216	1.12917	1962.51
Isoflurane	sample11	0.1	6	10913	0.732307	14902.2
Isoflurane	sample11	0.1	7	2683	0.583983	4594.31
Isoflurane	sample11	0.1	8	7243	0.752227	9628.74
Isoflurane	sample11	0.1	9	2001	0.327857	6103.28
Isoflurane	sample11	0.1	10	555	0.107374	5168.86
Isoflurane	sample11	0.1	11	373	0.129493	2880.47
Isoflurane	sample11	0.1	12	426	0.0702073	6067.75
Isoflurane	sample11	0.1	13	127	0.0388312	3270.57
Isoflurane	sample11	0.1	14	208	0.0702351	2961.48
Isoflurane	sample11	0.1	15	65	0.044018	1476.67
Isoflurane	sample11	0.1	16	105	0.0247792	4237.42
Isoflurane	sample11	0.1	17	50	0.0100634	4968.49
Isoflurane	sample11	0.1	18	66	0.0108416	6087.66
Isoflurane	sample11	0.1	19	28	0.00393024	7124.25
Isoflurane	sample11	0.1	20	32	0.0043104	7423.9
Isoflurane	sample11	0.1	21	0	0.00295859	0
Isoflurane	sample11	0.1	22	15	0.00189101	7932.28
Isoflurane	sample12	0.1	1	57376	6.65275	8624.41
Isoflurane	sample12	0.1	2	3792	2.79103	1358.64
Isoflurane	sample12	0.1	3	4897	1.43476	3413.11
Isoflurane	sample12	0.1	4	6223	1.35369	4597.05
Isoflurane	sample12	0.1	5	3843	1.21927	3151.89
Isoflurane	sample12	0.1	6	8614	0.786102	10957.9
Isoflurane	sample12	0.1	7	3911	0.634055	6168.23
Isoflurane	sample12	0.1	8	10932	0.948731	11522.8
Isoflurane	sample12	0.1	9	1839	0.278808	6595.94
Isoflurane	sample12	0.1	10	737	0.130294	5656.43
Isoflurane	sample12	0.1	11	841	0.156677	5367.72
Isoflurane	sample12	0.1	12	940	0.0795506	11816.4
Isoflurane	sample12	0.1	13	151	0.0398066	3793.34
Isoflurane	sample12	0.1	14	288	0.0847724	3397.33
Isoflurane	sample12	0.1	15	34	0.0417464	814.442
Isoflurane	sample12	0.1	16	92	0.0330159	2786.53
Isoflurane	sample12	0.1	17	64	0.0103488	6184.29
Isoflurane	sample12	0.1	18	123	0.0244238	5036.07
Isoflurane	sample12	0.1	19	46	0.00381037	12072.3
Isoflurane	sample12	0.1	20	1	0.00323059	309.541
Isoflurane	sample12	0.1	21	1	0.00420064	238.059
Isoflurane	sample12	0.1	22	9	0.00317824	2831.76
Isoflurane	sample13	0.1	1	47860	7.09648	6744.19
Isoflurane	sample13	0.1	2	6708	3.43455	1953.09
Isoflurane	sample13	0.1	3	5223	1.51862	3439.3
Isoflurane	sample13	0.1	4	9694	1.43071	6775.66
Isoflurane	sample13	0.1	5	3580	1.22184	2930.01
Isoflurane	sample13	0.1	6	14569	0.742192	19629.7
Isoflurane	sample13	0.1	7	5120	0.675045	7584.67
Isoflurane	sample13	0.1	8	8232	1.008	8166.69
Isoflurane	sample13	0.1	9	2720	0.250811	10844.8
Isoflurane	sample13	0.1	10	906	0.121819	7437.29
Isoflurane	sample13	0.1	11	953	0.135138	7052.04
Isoflurane	sample13	0.1	12	1154	0.113673	10151.9
Isoflurane	sample13	0.1	13	340	0.0421521	8066.03
Isoflurane	sample13	0.1	14	183	0.0815284	2244.62
Isoflurane	sample13	0.1	15	77	0.04776	1612.23
Isoflurane	sample13	0.1	16	90	0.032343	2782.67
Isoflurane	sample13	0.1	17	125	0.0105743	11821.1
Isoflurane	sample13	0.1	18	141	0.0113414	12432.4
Isoflurane	sample13	0.1	19	42	0.00533043	7879.29
Isoflurane	sample13	0.1	20	6	0.00475123	1262.83
Isoflurane	sample13	0.1	21	8	0.0035632	2245.17
Isoflurane	sample13	0.1	22	7	0.00339859	2059.68
Isoflurane	sample14	0.1	1	144777	7.65638	18909.3
Isoflurane	sample14	0.1	2	14099	3.35156	4206.7
Isoflurane	sample14	0.1	3	15686	1.75679	8928.77
Isoflurane	sample14	0.1	4	14578	1.52649	9550.03
Isoflurane	sample14	0.1	5	7575	1.25259	6047.47
Isoflurane	sample14	0.1	6	20427	0.827106	24697
Isoflurane	sample14	0.1	7	12421	0.736824	16857.5
Isoflurane	sample14	0.1	8	14743	1.05011	14039.4
Isoflurane	sample14	0.1	9	4880	0.285523	17091.4
Isoflurane	sample14	0.1	10	741	0.131803	5622.04
Isoflurane	sample14	0.1	11	1589	0.168004	9458.13
Isoflurane	sample14	0.1	12	1125	0.104934	10721
Isoflurane	sample14	0.1	13	550	0.0465793	11807.8
Isoflurane	sample14	0.1	14	280	0.0812045	3448.09
Isoflurane	sample14	0.1	15	187	0.053874	3471.06
Isoflurane	sample14	0.1	16	270	0.0368705	7322.93
Isoflurane	sample14	0.1	17	222	0.011502	19301
Isoflurane	sample14	0.1	18	260	0.0115924	22428.5
Isoflurane	sample14	0.1	19	56	0.00501005	11177.5
Isoflurane	sample14	0.1	20	4	0.00344864	1159.88
Isoflurane	sample14	0.1	21	1	0.00453421	220.546
Isoflurane	sample14	0.1	22	12	0.00298842	4015.51
Isoflurane	sample16	0.1	1	48674	7.39945	6578.06
Isoflurane	sample16	0.1	2	3826	2.95057	1296.7
Isoflurane	sample16	0.1	3	3622	1.41056	2567.78
Isoflurane	sample16	0.1	4	6944	1.55433	4467.52
Isoflurane	sample16	0.1	5	4965	1.26194	3934.41
Isoflurane	sample16	0.1	6	16311	0.812374	20078.2
Isoflurane	sample16	0.1	7	4171	0.646943	6447.25
Isoflurane	sample16	0.1	8	6174	0.869001	7104.71
Isoflurane	sample16	0.1	9	1834	0.259166	7076.55
Isoflurane	sample16	0.1	10	951	0.139213	6831.24
Isoflurane	sample16	0.1	11	1678	0.182811	9178.89
Isoflurane	sample16	0.1	12	718	0.0782943	9170.52
Isoflurane	sample16	0.1	13	351	0.0385283	9110.2
Isoflurane	sample16	0.1	14	184	0.0607852	3027.05
Isoflurane	sample16	0.1	15	48	0.046135	1040.42
Isoflurane	sample16	0.1	16	104	0.0340948	3050.32
Isoflurane	sample16	0.1	17	130	0.0113214	11482.7
Isoflurane	sample16	0.1	18	131	0.0111601	11738.3
Isoflurane	sample16	0.1	19	36	0.00624141	5767.93
Isoflurane	sample16	0.1	20	5	0.00600019	833.307
Isoflurane	sample16	0.1	21	0	0.00312742	0
Isoflurane	sample16	0.1	22	22	0.0038112	5772.46
Isoflurane	sample17	0.1	1	113517	6.84776	16577.3
Isoflurane	sample17	0.1	2	7243	2.61269	2772.24
Isoflurane	sample17	0.1	3	6567	1.38182	4752.44
Isoflurane	sample17	0.1	4	9368	1.45933	6419.4
Isoflurane	sample17	0.1	5	12969	1.26218	10275
Isoflurane	sample17	0.1	6	24357	0.899989	27063.7
Isoflurane	sample17	0.1	7	5257	0.651769	8065.74
Isoflurane	sample17	0.1	8	11392	0.860319	13241.6
Isoflurane	sample17	0.1	9	965	0.237439	4064.2
Isoflurane	sample17	0.1	10	1211	0.136991	8839.97
Isoflurane	sample17	0.1	11	2075	0.172325	12041.2
Isoflurane	sample17	0.1	12	1019	0.0818199	12454.2
Isoflurane	sample17	0.1	13	462	0.0396205	11660.6
Isoflurane	sample17	0.1	14	575	0.0674855	8520.35
Isoflurane	sample17	0.1	15	137	0.0408471	3353.97
Isoflurane	sample17	0.1	16	213	0.0325648	6540.8
Isoflurane	sample17	0.1	17	160	0.0102796	15564.8
Isoflurane	sample17	0.1	18	224	0.0108612	20623.8
Isoflurane	sample17	0.1	19	44	0.00505018	8712.57
Isoflurane	sample17	0.1	20	40	0.00436877	9155.9
Isoflurane	sample17	0.1	21	2	0.00340941	586.612
Isoflurane	sample17	0.1	22	26	0.00286938	9061.2
Isoflurane	sample18	0.1	1	43597	6.43708	6772.79
Isoflurane	sample18	0.1	2	2982	2.89622	1029.62
Isoflurane	sample18	0.1	3	1895	1.41367	1340.48
Isoflurane	sample18	0.1	4	4363	1.30784	3336.04
Isoflurane	sample18	0.1	5	5524	1.26831	4355.41
Isoflurane	sample18	0.1	6	8874	0.806713	11000.2
Isoflurane	sample18	0.1	7	1371	0.565996	2422.28
Isoflurane	sample18	0.1	8	9166	0.841766	10889
Isoflurane	sample18	0.1	9	591	0.305947	1931.71
Isoflurane	sample18	0.1	10	645	0.105058	6139.48
Isoflurane	sample18	0.1	11	1316	0.139761	9416.1
Isoflurane	sample18	0.1	12	413	0.077869	5303.78
Isoflurane	sample18	0.1	13	121	0.0338632	3573.2
Isoflurane	sample18	0.1	14	129	0.066148	1950.17
Isoflurane	sample18	0.1	15	68	0.0437044	1555.91
Isoflurane	sample18	0.1	16	62	0.0299717	2068.62
Isoflurane	sample18	0.1	17	38	0.0097415	3900.84
Isoflurane	sample18	0.1	18	130	0.0102216	12718.1
Isoflurane	sample18	0.1	19	52	0.00508179	10232.6
Isoflurane	sample18	0.1	20	3	0.00355917	842.894
Isoflurane	sample18	0.1	21	9	0.00376979	2387.4
Isoflurane	sample18	0.1	22	11	0.0026224	4194.63
Isoflurane	sample19	0.1	1	81444	7.30988	11141.6
Isoflurane	sample19	0.1	2	4897	3.46365	1413.83
Isoflurane	sample19	0.1	3	4505	1.61004	2798.07
Isoflurane	sample19	0.1	4	7721	1.54189	5007.48
Isoflurane	sample19	0.1	5	10628	1.24836	8513.59
Isoflurane	sample19	0.1	6	18806	0.843669	22290.7
Isoflurane	sample19	0.1	7	4627	0.693444	6672.49
Isoflurane	sample19	0.1	8	10491	0.935361	11216
Isoflurane	sample19	0.1	9	1898	0.261545	7256.87
Isoflurane	sample19	0.1	10	1369	0.121942	11226.6
Isoflurane	sample19	0.1	11	2095	0.166639	12572.1
Isoflurane	sample19	0.1	12	1410	0.0608461	23173.2
Isoflurane	sample19	0.1	13	636	0.0411418	15458.7
Isoflurane	sample19	0.1	14	199	0.0825396	2410.96
Isoflurane	sample19	0.1	15	62	0.0491205	1262.2
Isoflurane	sample19	0.1	16	109	0.029361	3712.41
Isoflurane	sample19	0.1	17	174	0.00984966	17665.6
Isoflurane	sample19	0.1	18	147	0.0117316	12530.3
Isoflurane	sample19	0.1	19	51	0.0050784	10042.5
Isoflurane	sample19	0.1	20	6	0.00433958	1382.62
Isoflurane	sample19	0.1	21	6	0.00321222	1867.86
Isoflurane	sample19	0.1	22	50	0.00356922	14008.7
Isoflurane	sample20	0.1	1	155400	6.85309	22675.9
Isoflurane	sample20	0.1	2	11054	2.91175	3796.35
Isoflurane	sample20	0.1	3	12580	1.31122	9594.13
Isoflurane	sample20	0.1	4	17072	1.3809	12362.9
Isoflurane	sample20	0.1	5	10031	1.09814	9134.56
Isoflurane	sample20	0.1	6	23687	0.736612	32156.7
Isoflurane	sample20	0.1	7	7275	0.610019	11925.9
Isoflurane	sample20	0.1	8	19706	0.918867	21446
Isoflurane	sample20	0.1	9	5393	0.316963	17014.6
Isoflurane	sample20	0.1	10	986	0.125445	7860.02
Isoflurane	sample20	0.1	11	3674	0.166528	22062.3
Isoflurane	sample20	0.1	12	1506	0.0672974	22378.3
Isoflurane	sample20	0.1	13	474	0.0378222	12532.3
Isoflurane	sample20	0.1	14	716	0.0713806	10030.7
Isoflurane	sample20	0.1	15	142	0.0372927	3807.71
Isoflurane	sample20	0.1	16	428	0.0307771	13906.4
Isoflurane	sample20	0.1	17	195	0.010183	19149.5
Isoflurane	sample20	0.1	18	415	0.0107716	38527.3
Isoflurane	sample20	0.1	19	86	0.00539021	15954.9
Isoflurane	sample20	0.1	20	20	0.00425978	4695.08
Isoflurane	sample20	0.1	21	5	0.00492102	1016.05
Isoflurane	sample20	0.1	22	20	0.00355085	5632.46
Control	sample01	0.15	0.15	369535	27.1176	13627.1
Control	sample01	0.15	2	15432	2.04865	7532.78
Control	sample01	0.15	3	27091	0.746236	36303.5
Control	sample01	0.15	4	31292	1.61492	19376.8
Control	sample01	0.15	5	2629	0.197296	13325.1
Control	sample01	0.15	6	1393	0.0814844	17095.3
Control	sample01	0.15	7	336	0.0411363	8167.98
Control	sample01	0.15	8	114	0.0196179	5811.03
Control	sample01	0.15	9	736	0.0322582	22815.9
Control	sample01	0.15	10	46	0.00907002	5071.66
Control	sample01	0.15	11	370	0.0193526	19118.8
Control	sample01	0.15	12	5	0.0110602	452.07
Control	sample01	0.15	13	101	0.00832141	12137.4
Control	sample02	0.15	1	282135	22.7771	12386.8
Control	sample02	0.15	2	16459	1.8875	8719.99
Control	sample02	0.15	3	23562	0.749875	31421.2
Control	sample02	0.15	4	28420	1.307	21744.4
Control	sample02	0.15	5	1876	0.147384	12728.7
Control	sample02	0.15	6	849	0.0740602	11463.6
Control	sample02	0.15	7	283	0.0351437	8052.64
Control	sample02	0.15	8	96	0.0219394	4375.69
Control	sample02	0.15	9	517	0.0268374	19264.2
Control	sample02	0.15	10	40	0.0133098	3005.31
Control	sample02	0.15	11	15	0.0100918	1486.35
Control	sample02	0.15	12	3	0.0094736	316.669
Control	sample02	0.15	13	109	0.00763104	14283.8
Control	sample05	0.15	1	671522	24.1483	27808.3
Control	sample05	0.15	2	57433	2.23746	25668.8
Control	sample05	0.15	3	27384	0.934102	29315.9
Control	sample05	0.15	4	41660	1.6326	25517.5
Control	sample05	0.15	5	4411	0.260582	16927.5
Control	sample05	0.15	6	2161	0.0850252	25416
Control	sample05	0.15	7	314	0.031098	10097.1
Control	sample05	0.15	8	266	0.01673	15899.5
Control	sample05	0.15	9	902	0.0213168	42314
Control	sample05	0.15	10	81	0.0129279	6265.5
Control	sample05	0.15	11	309	0.0182732	16910
Control	sample05	0.15	12	42	0.0076608	5482.46
Control	sample05	0.15	13	61	0.00604915	10084.1
Control	sample06	0.15	1	621104	25.9176	23964.5
Control	sample06	0.15	2	36734	2.09435	17539.6
Control	sample06	0.15	3	31951	0.911246	35063
Control	sample06	0.15	4	44336	1.6802	26387.3
Control	sample06	0.15	5	3216	0.201212	15983.1
Control	sample06	0.15	6	2328	0.0788145	29537.7
Control	sample06	0.15	7	596	0.037938	15709.8
Control	sample06	0.15	8	398	0.023801	16722
Control	sample06	0.15	9	942	0.0212874	44251.5
Control	sample06	0.15	10	193	0.0129372	14918.3
Control	sample06	0.15	11	599	0.0258026	23214.7
Control	sample06	0.15	12	49	0.0113423	4320.12
Control	sample06	0.15	13	78	0.00807162	9663.49
Control	sample08	0.15	1	565997	24.3859	23210
Control	sample08	0.15	2	24581	2.05269	11975
Control	sample08	0.15	3	26855	0.896374	29959.6
Control	sample08	0.15	4	38360	1.57632	24335.2
Control	sample08	0.15	5	1763	0.14448	12202.4
Control	sample08	0.15	6	1061	0.081773	12974.9
Control	sample08	0.15	7	423	0.0363832	11626.3
Control	sample08	0.15	8	155	0.0267927	5785.16
Control	sample08	0.15	9	420	0.0205846	20403.6
Control	sample08	0.15	10	57	0.0138356	4119.79
Control	sample08	0.15	11	435	0.023746	18318.8
Control	sample08	0.15	12	9	0.00904678	994.829
Control	sample08	0.15	13	144	0.00771814	18657.3
Control	sample09	0.15	1	430734	26.4512	16284.1
Control	sample09	0.15	2	30274	1.92564	15721.6
Control	sample09	0.15	3	31740	0.982667	32299.9
Control	sample09	0.15	4	41139	1.59856	25735
Control	sample09	0.15	5	1588	0.115787	13714.9
Control	sample09	0.15	6	1222	0.0742927	16448.5
Control	sample09	0.15	7	474	0.0360702	13141
Control	sample09	0.15	8	174	0.0197014	8831.87
Control	sample09	0.15	9	506	0.0197908	25567.5
Control	sample09	0.15	10	185	0.0140637	13154.5
Control	sample09	0.15	11	332	0.0215646	15395.6
Control	sample09	0.15	12	7	0.00865978	808.335
Control	sample09	0.15	13	136	0.00894938	15196.6
Control	sample10	0.15	1	808419	24.6105	32848.5
Control	sample10	0.15	2	25919	1.8281	14178.1
Control	sample10	0.15	3	33625	0.923491	36410.8
Control	sample10	0.15	4	42934	1.5349	27971.9
Control	sample10	0.15	5	3605	0.153679	23458
Control	sample10	0.15	6	1737	0.069263	25078.3
Control	sample10	0.15	7	458	0.0340228	13461.5
Control	sample10	0.15	8	242	0.0225318	10740.4
Control	sample10	0.15	9	645	0.0173402	37196.8
Control	sample10	0.15	10	159	0.0106192	14972.9
Control	sample10	0.15	11	199	0.0112584	17675.7
Control	sample10	0.15	12	15	0.00875955	1712.42
Control	sample10	0.15	13	63	0.00692877	9092.53
Isoflurane	sample11	0.15	1	98919	21.0783	4692.93
Isoflurane	sample11	0.15	2	4018	1.75013	2295.82
Isoflurane	sample11	0.15	3	12619	0.854975	14759.5
Isoflurane	sample11	0.15	4	11136	1.10917	10039.9
Isoflurane	sample11	0.15	5	748	0.120226	6221.6
Isoflurane	sample11	0.15	6	282	0.0730796	3858.81
Isoflurane	sample11	0.15	7	153	0.032831	4660.22
Isoflurane	sample11	0.15	8	58	0.0167068	3471.64
Isoflurane	sample11	0.15	9	112	0.0193144	5798.77
Isoflurane	sample11	0.15	10	3	0.012022	249.542
Isoflurane	sample11	0.15	11	82	0.0153911	5327.75
Isoflurane	sample11	0.15	12	2	0.00771066	259.381
Isoflurane	sample11	0.15	13	50	0.00666003	7507.47
Isoflurane	sample12	0.15	1	119429	22.7304	5254.14
Isoflurane	sample12	0.15	2	6344	1.91138	3319.07
Isoflurane	sample12	0.15	3	10141	0.930823	10894.7
Isoflurane	sample12	0.15	4	16605	1.43818	11545.9
Isoflurane	sample12	0.15	5	1395	0.132008	10567.5
Isoflurane	sample12	0.15	6	339	0.0730718	4639.27
Isoflurane	sample12	0.15	7	259	0.0350114	7397.59
Isoflurane	sample12	0.15	8	56	0.0222716	2514.41
Isoflurane	sample12	0.15	9	217	0.0434531	4993.89
Isoflurane	sample12	0.15	10	58	0.0165754	3499.16
Isoflurane	sample12	0.15	11	5	0.0112532	444.319
Isoflurane	sample12	0.15	12	4	0.0085616	467.202
Isoflurane	sample12	0.15	13	63	0.00839104	7508.01
Isoflurane	sample13	0.15	1	117328	24.7046	4749.24
Isoflurane	sample13	0.15	2	6073	1.93048	3145.85
Isoflurane	sample13	0.15	3	17650	0.875376	20162.8
Isoflurane	sample13	0.15	4	11907	1.46954	8102.56
Isoflurane	sample13	0.15	5	1759	0.190966	9211.08
Isoflurane	sample13	0.15	6	705	0.0782356	9011.24
Isoflurane	sample13	0.15	7	385	0.037791	10187.6
Isoflurane	sample13	0.15	8	44	0.0208515	2110.16
Isoflurane	sample13	0.15	9	239	0.0203522	11743.2
Isoflurane	sample13	0.15	10	108	0.0138428	7801.92
Isoflurane	sample13	0.15	11	28	0.017798	1573.21
Isoflurane	sample13	0.15	12	38	0.0100608	3777.04
Isoflurane	sample13	0.15	13	56	0.00752	7446.81
Isoflurane	sample14	0.15	1	315878	26.658	11849.3
Isoflurane	sample14	0.15	2	12289	1.94228	6327.1
Isoflurane	sample14	0.15	3	24401	0.9763	24993.3
Isoflurane	sample14	0.15	4	21170	1.55685	13598
Isoflurane	sample14	0.15	5	1799	0.176989	10164.4
Isoflurane	sample14	0.15	6	1043	0.0846906	12315.4
Isoflurane	sample14	0.15	7	600	0.0391174	15338.5
Isoflurane	sample14	0.15	8	99	0.0205103	4826.83
Isoflurane	sample14	0.15	9	437	0.0212906	20525.5
Isoflurane	sample14	0.15	10	37	0.0141784	2609.61
Isoflurane	sample14	0.15	11	12	0.013482	890.077
Isoflurane	sample14	0.15	12	98	0.00966323	10141.5
Isoflurane	sample14	0.15	13	45	0.00667059	6746.03
Isoflurane	sample16	0.15	1	118111	24.2273	4875.12
Isoflurane	sample16	0.15	2	8532	1.97005	4330.85
Isoflurane	sample16	0.15	3	19296	0.954808	20209.3
Isoflurane	sample16	0.15	4	8958	1.31494	6812.49
Isoflurane	sample16	0.15	5	1060	0.133057	7966.49
Isoflurane	sample16	0.15	6	712	0.0758026	9392.82
Isoflurane	sample16	0.15	7	448	0.0383615	11678.4
Isoflurane	sample16	0.15	8	103	0.0252447	4080.07
Isoflurane	sample16	0.15	9	222	0.0199396	11133.6
Isoflurane	sample16	0.15	10	18	0.0117505	1531.85
Isoflurane	sample16	0.15	11	18	0.01981	908.63
Isoflurane	sample16	0.15	12	8	0.00949037	842.96
Isoflurane	sample16	0.15	13	45	0.00880282	5112
Isoflurane	sample17	0.15	1	233942	22.8764	10226.4
Isoflurane	sample17	0.15	2	21283	1.96943	10806.7
Isoflurane	sample17	0.15	3	28302	1.05656	26787
Isoflurane	sample17	0.15	4	17582	1.36591	12872
Isoflurane	sample17	0.15	5	1842	0.139304	13222.9
Isoflurane	sample17	0.15	6	877	0.0725922	12081.2
Isoflurane	sample17	0.15	7	567	0.0373512	15180.2
Isoflurane	sample17	0.15	8	177	0.0195294	9063.25
Isoflurane	sample17	0.15	9	372	0.01887	19713.8
Isoflurane	sample17	0.15	10	109	0.014839	7345.49
Isoflurane	sample17	0.15	11	153	0.0160913	9508.26
Isoflurane	sample17	0.15	12	29	0.00737043	3934.64
Isoflurane	sample17	0.15	13	83	0.007248	11451.4
Isoflurane	sample18	0.15	1	83098	22.1163	3757.31
Isoflurane	sample18	0.15	2	8386	1.92371	4359.29
Isoflurane	sample18	0.15	3	10212	0.948111	10770.9
Isoflurane	sample18	0.15	4	13701	1.31634	10408.4
Isoflurane	sample18	0.15	5	706	0.135407	5213.93
Isoflurane	sample18	0.15	6	306	0.0638466	4792.74
Isoflurane	sample18	0.15	7	179	0.033399	5359.45
Isoflurane	sample18	0.15	8	80	0.017622	4539.78
Isoflurane	sample18	0.15	9	209	0.0190214	10987.6
Isoflurane	sample18	0.15	10	36	0.0125501	2868.49
Isoflurane	sample18	0.15	11	10	0.0121992	819.724
Isoflurane	sample18	0.15	12	4	0.0076016	526.205
Isoflurane	sample18	0.15	13	29	0.00838195	3459.81
Isoflurane	sample19	0.15	1	164772	25.0598	6575.16
Isoflurane	sample19	0.15	2	17281	1.92813	8962.58
Isoflurane	sample19	0.15	3	22177	0.987609	22455.2
Isoflurane	sample19	0.15	4	15689	1.44436	10862.3
Isoflurane	sample19	0.15	5	2228	0.103514	21523.8
Isoflurane	sample19	0.15	6	1126	0.0785668	14331.8
Isoflurane	sample19	0.15	7	518	0.0342422	15127.5
Isoflurane	sample19	0.15	8	145	0.0241898	5994.26
Isoflurane	sample19	0.15	9	268	0.0199016	13466.2
Isoflurane	sample19	0.15	10	29	0.0113164	2562.66
Isoflurane	sample19	0.15	11	23	0.0155122	1482.7
Isoflurane	sample19	0.15	12	25	0.00690957	3618.17
Isoflurane	sample19	0.15	13	41	0.00723059	5670.35
Isoflurane	sample20	0.15	1	307712	22.6749	13570.6
Isoflurane	sample20	0.15	2	16995	1.74787	9723.26
Isoflurane	sample20	0.15	3	27809	0.869668	31976.6
Isoflurane	sample20	0.15	4	31479	1.4322	21979.5
Isoflurane	sample20	0.15	5	2452	0.118162	20751.1
Isoflurane	sample20	0.15	6	894	0.0691923	12920.5
Isoflurane	sample20	0.15	7	608	0.0361768	16806.4
Isoflurane	sample20	0.15	8	186	0.020924	8889.3
Isoflurane	sample20	0.15	9	675	0.0187002	36095.8
Isoflurane	sample20	0.15	10	83	0.011259	7371.88
Isoflurane	sample20	0.15	11	103	0.0166526	6185.22
Isoflurane	sample20	0.15	12	24	0.00703942	3409.37
Isoflurane	sample20	0.15	13	81	0.00792038	10226.8
Control	sample01	0.2	1	425747	34.629	12294.5
Control	sample01	0.2	2	29323	0.817553	35866.8
Control	sample01	0.2	3	35097	1.85684	18901.4
Control	sample01	0.2	4	3609	0.271257	13304.7
Control	sample01	0.2	5	2030	0.11818	17177.2
Control	sample01	0.2	6	79	0.0170369	4636.99
Control	sample01	0.2	7	615	0.0338215	18183.7
Control	sample01	0.2	8	1040	0.04444	23402.3
Control	sample01	0.2	9	13	0.0244522	531.649
Control	sample01	0.2	10	196	0.0091152	21502.5
Control	sample01	0.2	11	16	0.00370061	4323.61
Control	sample01	0.2	12	13	0.00416979	3117.66
Control	sample01	0.2	13	0	0.00399021	0
Control	sample01	0.2	14	63	0.00405082	15552.4
Control	sample02	0.2	1	343751	29.273	11742.9
Control	sample02	0.2	2	25115	0.826641	30382
Control	sample02	0.2	3	31045	1.47026	21115.4
Control	sample02	0.2	4	2454	0.202611	12111.9
Control	sample02	0.2	5	1289	0.104468	12338.7
Control	sample02	0.2	6	72	0.0254008	2834.55
Control	sample02	0.2	7	23	0.0175436	1311.02
Control	sample02	0.2	8	714	0.038291	18646.7
Control	sample02	0.2	9	7	0.020667	338.704
Control	sample02	0.2	10	40	0.00563162	7102.76
Control	sample02	0.2	11	3	0.00548179	547.266
Control	sample02	0.2	12	19	0.00378125	5024.8
Control	sample02	0.2	13	10	0.00514976	1941.84
Control	sample02	0.2	14	50	0.00414899	12051.1
Control	sample05	0.2	1	828874	30.9243	26803.3
Control	sample05	0.2	2	29301	1.02181	28675.6
Control	sample05	0.2	3	47571	1.91003	24905.9
Control	sample05	0.2	4	5827	0.356877	16327.7
Control	sample05	0.2	5	2834	0.116417	24343.4
Control	sample05	0.2	6	172	0.0235388	7307.08
Control	sample05	0.2	7	507	0.0322636	15714.3
Control	sample05	0.2	8	1113	0.0287172	38757.3
Control	sample05	0.2	9	157	0.0163192	9620.55
Control	sample05	0.2	10	142	0.00654662	21690.6
Control	sample05	0.2	11	34	0.00391936	8674.89
Control	sample05	0.2	12	116	0.00391283	29646
Control	sample05	0.2	13	71	0.00281958	25181
Control	sample05	0.2	14	90	0.0037504	23997.4
Control	sample06	0.2	1	745695	33.301	22392.6
Control	sample06	0.2	2	34259	0.994284	34456
Control	sample06	0.2	3	50752	1.9455	26086.9
Control	sample06	0.2	4	4347	0.273188	15912.1
Control	sample06	0.2	5	2997	0.111481	26883.6
Control	sample06	0.2	6	344	0.0244225	14085.4
Control	sample06	0.2	7	978	0.0461672	21183.9
Control	sample06	0.2	8	1238	0.0301696	41034.7
Control	sample06	0.2	9	97	0.0242328	4002.84
Control	sample06	0.2	10	244	0.00685958	35570.7
Control	sample06	0.2	11	107	0.00317978	33650.2
Control	sample06	0.2	12	9	0.0023104	3895.43
Control	sample06	0.2	13	5	0.00459917	1087.15
Control	sample06	0.2	14	36	0.00445939	8072.85
Control	sample08	0.2	1	699659	31.3326	22330.1
Control	sample08	0.2	2	28469	0.976039	29167.9
Control	sample08	0.2	3	43250	1.82897	23647.1
Control	sample08	0.2	4	2273	0.198758	11436
Control	sample08	0.2	5	1450	0.113909	12729.5
Control	sample08	0.2	6	120	0.0258776	4637.22
Control	sample08	0.2	7	840	0.0426626	19689.4
Control	sample08	0.2	8	528	0.0285424	18498.8
Control	sample08	0.2	9	31	0.0202248	1532.77
Control	sample08	0.2	10	145	0.00722982	20055.8
Control	sample08	0.2	11	9	0.00438022	2054.69
Control	sample08	0.2	12	7	0.005472	1279.24
Control	sample08	0.2	13	1	0.0041184	242.813
Control	sample08	0.2	14	46	0.00459162	10018.3
Control	sample09	0.2	1	517414	33.5829	15407.1
Control	sample09	0.2	2	33836	1.07879	31364.6
Control	sample09	0.2	3	45621	1.83926	24804
Control	sample09	0.2	4	2161	0.156356	13821
Control	sample09	0.2	5	1628	0.102719	15849.1
Control	sample09	0.2	6	320	0.0286902	11153.6
Control	sample09	0.2	7	535	0.037353	14322.8
Control	sample09	0.2	8	609	0.0274648	22173.9
Control	sample09	0.2	9	35	0.0212796	1644.77
Control	sample09	0.2	10	205	0.00978118	20958.6
Control	sample09	0.2	11	39	0.00366982	10627.2
Control	sample09	0.2	12	78	0.0048128	16206.8
Control	sample09	0.2	13	2	0.0047488	421.159
Control	sample09	0.2	14	62	0.0034608	17914.9
Control	sample10	0.2	1	992198	31.529	31469.3
Control	sample10	0.2	2	35600	1.01113	35208.2
Control	sample10	0.2	3	48435	1.7596	27526.1
Control	sample10	0.2	4	4916	0.21472	22894.9
Control	sample10	0.2	5	2361	0.0979958	24092.9
Control	sample10	0.2	6	330	0.0205322	16072.3
Control	sample10	0.2	7	404	0.0217528	18572.3
Control	sample10	0.2	8	828	0.0252432	32800.9
Control	sample10	0.2	9	50	0.020169	2479.06
Control	sample10	0.2	10	129	0.00611014	21112.4
Control	sample10	0.2	11	200	0.00779821	25646.9
Control	sample10	0.2	12	165	0.00490022	33671.9
Control	sample10	0.2	13	0	0.0035392	0
Control	sample10	0.2	14	87	0.00513082	16956.4
Isoflurane	sample11	0.2	1	121885	26.8814	4534.18
Isoflurane	sample11	0.2	2	13705	0.932455	14697.8
Isoflurane	sample11	0.2	3	13008	1.31465	9894.67
Isoflurane	sample11	0.2	4	1016	0.165731	6130.42
Isoflurane	sample11	0.2	5	474	0.10457	4532.86
Isoflurane	sample11	0.2	6	8	0.0224524	356.31
Isoflurane	sample11	0.2	7	137	0.0265937	5151.6
Isoflurane	sample11	0.2	8	139	0.0252888	5496.5
Isoflurane	sample11	0.2	9	12	0.0187983	638.354
Isoflurane	sample11	0.2	10	20	0.00518061	3860.55
Isoflurane	sample11	0.2	11	52	0.00366899	14172.8
Isoflurane	sample11	0.2	12	10	0.00318899	3135.79
Isoflurane	sample11	0.2	13	27	0.00381037	7085.93
Isoflurane	sample11	0.2	14	14	0.00382202	3662.99
Isoflurane	sample12	0.2	1	145094	29.0235	4999.18
Isoflurane	sample12	0.2	2	10957	1.0168	10776
Isoflurane	sample12	0.2	3	19464	1.7019	11436.6
Isoflurane	sample12	0.2	4	1724	0.181836	9481.08
Isoflurane	sample12	0.2	5	623	0.10737	5802.39
Isoflurane	sample12	0.2	6	87	0.0281898	3086.22
Isoflurane	sample12	0.2	7	9	0.0223524	402.64
Isoflurane	sample12	0.2	8	297	0.0598495	4962.45
Isoflurane	sample12	0.2	9	18	0.0198368	907.404
Isoflurane	sample12	0.2	10	12	0.00615738	1948.88
Isoflurane	sample12	0.2	11	18	0.00358003	5027.89
Isoflurane	sample12	0.2	12	42	0.00430957	9745.76
Isoflurane	sample12	0.2	13	4	0.00423142	945.308
Isoflurane	sample12	0.2	14	19	0.00385939	4923.06
Isoflurane	sample13	0.2	1	152599	32.0611	4759.63
Isoflurane	sample13	0.2	2	19148	0.962538	19893.2
Isoflurane	sample13	0.2	3	13561	1.69527	7999.31
Isoflurane	sample13	0.2	4	2287	0.264947	8631.91
Isoflurane	sample13	0.2	5	1078	0.109448	9849.44
Isoflurane	sample13	0.2	6	180	0.0256502	7017.5
Isoflurane	sample13	0.2	7	39	0.0303131	1286.57
Isoflurane	sample13	0.2	8	328	0.0276611	11857.8
Isoflurane	sample13	0.2	9	77	0.0225384	3416.39
Isoflurane	sample13	0.2	10	55	0.00541184	10162.9
Isoflurane	sample13	0.2	11	57	0.00517062	11023.8
Isoflurane	sample13	0.2	12	12	0.00398099	3014.32
Isoflurane	sample13	0.2	13	5	0.00373882	1337.32
Isoflurane	sample13	0.2	14	39	0.00420979	9264.12
Isoflurane	sample14	0.2	1	381958	33.8816	11273.3
Isoflurane	sample14	0.2	2	26312	1.06074	24805.4
Isoflurane	sample14	0.2	3	24849	1.84769	13448.7
Isoflurane	sample14	0.2	4	2364	0.241374	9793.94
Isoflurane	sample14	0.2	5	1553	0.120721	12864.4
Isoflurane	sample14	0.2	6	53	0.0263756	2009.43
Isoflurane	sample14	0.2	7	17	0.0235121	723.031
Isoflurane	sample14	0.2	8	539	0.0278498	19353.8
Isoflurane	sample14	0.2	9	175	0.021775	8036.75
Isoflurane	sample14	0.2	10	52	0.00749101	6941.66
Isoflurane	sample14	0.2	11	59	0.00522138	11299.7
Isoflurane	sample14	0.2	12	140	0.00603002	23217.2
Isoflurane	sample14	0.2	13	7	0.00377958	1852.06
Isoflurane	sample14	0.2	14	7	0.00336941	2077.52
Isoflurane	sample16	0.2	1	145636	30.6473	4752
Isoflurane	sample16	0.2	2	20713	1.0363	19987.4
Isoflurane	sample16	0.2	3	10541	1.57462	6694.3
Isoflurane	sample16	0.2	4	1362	0.187435	7266.51
Isoflurane	sample16	0.2	5	1044	0.107588	9703.65
Isoflurane	sample16	0.2	6	39	0.0217684	1791.58
Isoflurane	sample16	0.2	7	29	0.0354415	818.249
Isoflurane	sample16	0.2	8	297	0.0264564	11226
Isoflurane	sample16	0.2	9	28	0.0211423	1324.36
Isoflurane	sample16	0.2	10	42	0.006352	6612.09
Isoflurane	sample16	0.2	11	22	0.0022688	9696.76
Isoflurane	sample16	0.2	12	8	0.0022496	3556.19
Isoflurane	sample16	0.2	13	8	0.0038512	2077.27
Isoflurane	sample16	0.2	14	6	0.00344179	1743.28
Isoflurane	sample17	0.2	1	282853	28.9324	9776.36
Isoflurane	sample17	0.2	2	30371	1.14629	26495
Isoflurane	sample17	0.2	3	19645	1.54818	12689.1
Isoflurane	sample17	0.2	4	2844	0.191938	14817.3
Isoflurane	sample17	0.2	5	1334	0.103951	12833
Isoflurane	sample17	0.2	6	175	0.0269921	6483.37
Isoflurane	sample17	0.2	7	243	0.0276911	8775.39
Isoflurane	sample17	0.2	8	488	0.0262918	18560.9
Isoflurane	sample17	0.2	9	93	0.0191345	4860.34
Isoflurane	sample17	0.2	10	48	0.00576058	8332.5
Isoflurane	sample17	0.2	11	7	0.00243021	2880.41
Isoflurane	sample17	0.2	12	1	0.00224877	444.688
Isoflurane	sample17	0.2	13	2	0.00316819	631.275
Isoflurane	sample17	0.2	14	35	0.00417818	8376.86
Isoflurane	sample18	0.2	1	104826	28.506	3677.33
Isoflurane	sample18	0.2	2	10904	1.03456	10539.7
Isoflurane	sample18	0.2	3	15671	1.54577	10138
Isoflurane	sample18	0.2	4	905	0.186091	4863.22
Isoflurane	sample18	0.2	5	463	0.091978	5033.81
Isoflurane	sample18	0.2	6	61	0.0243484	2505.3
Isoflurane	sample18	0.2	7	13	0.0212543	611.642
Isoflurane	sample18	0.2	8	264	0.026094	10117.3
Isoflurane	sample18	0.2	9	15	0.0179124	837.409
Isoflurane	sample18	0.2	10	39	0.00567162	6876.35
Isoflurane	sample18	0.2	11	4	0.00441939	905.102
Isoflurane	sample18	0.2	12	1	0.00567238	176.293
Isoflurane	sample18	0.2	13	2	0.00274976	727.336
Isoflurane	sample18	0.2	14	30	0.00409062	7333.84
Isoflurane	sample19	0.2	1	207071	32.0778	6455.28
Isoflurane	sample19	0.2	2	23861	1.07416	22213.7
Isoflurane	sample19	0.2	3	18056	1.69356	10661.6
Isoflurane	sample19	0.2	4	2841	0.140705	20191.2
Isoflurane	sample19	0.2	5	1627	0.111673	14569.3
Isoflurane	sample19	0.2	6	61	0.0205695	2965.56
Isoflurane	sample19	0.2	7	38	0.0295766	1284.8
Isoflurane	sample19	0.2	8	364	0.0274211	13274.4
Isoflurane	sample19	0.2	9	54	0.0161644	3340.67
Isoflurane	sample19	0.2	10	66	0.0063712	10359.1
Isoflurane	sample19	0.2	11	58	0.00388122	14943.8
Isoflurane	sample19	0.2	12	177	0.00515085	34363.3
Isoflurane	sample19	0.2	13	4	0.00301082	1328.54
Isoflurane	sample19	0.2	14	13	0.00347002	3746.38
Isoflurane	sample20	0.2	1	378410	29.0959	13005.6
Isoflurane	sample20	0.2	2	29906	0.951147	31442
Isoflurane	sample20	0.2	3	36553	1.66891	21902.3
Isoflurane	sample20	0.2	4	3307	0.169044	19562.9
Isoflurane	sample20	0.2	5	1307	0.0975342	13400.4
Isoflurane	sample20	0.2	6	119	0.020131	5911.28
Isoflurane	sample20	0.2	7	176	0.0278003	6330.88
Isoflurane	sample20	0.2	8	910	0.0278412	32685.4
Isoflurane	sample20	0.2	9	63	0.016573	3801.37
Isoflurane	sample20	0.2	10	115	0.0061168	18800.7
Isoflurane	sample20	0.2	11	59	0.00649318	9086.45
Isoflurane	sample20	0.2	12	57	0.00408262	13961.6
Isoflurane	sample20	0.2	13	5	0.00283123	1766.02
Isoflurane	sample20	0.2	14	33	0.00375142	8796.66
Control	sample01	0.3	1	514021	45.1713	11379.4
Control	sample01	0.3	2	32041	0.911439	35154.3
Control	sample01	0.3	3	3266	0.189983	17191
Control	sample01	0.3	4	153	0.0328994	4650.54
Control	sample01	0.3	5	977	0.0614687	15894.3
Control	sample01	0.3	6	1401	0.0600828	23317.8
Control	sample01	0.3	7	47	0.0150434	3124.3
Control	sample01	0.3	8	268	0.0183915	14572
Control	sample01	0.3	9	414	0.0227313	18212.8
Control	sample01	0.3	10	93	0.011041	8423.13
Control	sample01	0.3	11	916	0.0121526	75375
Control	sample01	0.3	12	46	0.0124622	3691.16
Control	sample01	0.3	13	7	0.00821997	851.585
Control	sample01	0.3	14	459	0.00747014	61444.6
Control	sample01	0.3	15	14	0.00752941	1859.38
Control	sample01	0.3	16	38	0.0097216	3908.82
Control	sample01	0.3	17	9	0.00549235	1638.64
Control	sample01	0.3	18	14	0.00767334	1824.5
Control	sample01	0.3	19	92	0.00582221	15801.6
Control	sample01	0.3	20	52	0.00650522	7993.59
Control	sample01	0.3	21	12	0.0054704	2193.62
Control	sample01	0.3	22	28	0.00418323	6693.39
Control	sample01	0.3	23	156	0.00549939	28366.8
Control	sample01	0.3	24	40	0.00286285	13972.1
Control	sample02	0.3	1	429880	38.1704	11262.1
Control	sample02	0.3	2	26917	0.918245	29313.5
Control	sample02	0.3	3	2133	0.164964	12930.1
Control	sample02	0.3	4	147	0.0455126	3229.88
Control	sample02	0.3	5	54	0.033812	1597.06
Control	sample02	0.3	6	944	0.052329	18039.7
Control	sample02	0.3	7	155	0.0200428	7733.47
Control	sample02	0.3	8	264	0.0190788	13837.4
Control	sample02	0.3	9	106	0.0153142	6921.69
Control	sample02	0.3	10	16	0.017012	940.511
Control	sample02	0.3	11	201	0.014145	14209.9
Control	sample02	0.3	12	51	0.0112708	4524.97
Control	sample02	0.3	13	35	0.0109894	3184.88
Control	sample02	0.3	14	74	0.00682118	10848.6
Control	sample02	0.3	15	46	0.00908019	5065.97
Control	sample02	0.3	16	26	0.00718976	3616.25
Control	sample02	0.3	17	17	0.00547859	3102.99
Control	sample02	0.3	18	4	0.00618899	646.309
Control	sample02	0.3	19	110	0.00663078	16589.3
Control	sample02	0.3	20	77	0.00504506	15262.5
Control	sample02	0.3	21	34	0.00596941	5695.71
Control	sample02	0.3	22	124	0.00463142	26773.6
Control	sample02	0.3	23	73	0.00442861	16483.7
Control	sample02	0.3	24	39	0.00312	12500
Control	sample05	0.3	1	1027450	40.2941	25498.8
Control	sample05	0.3	2	31436	1.13322	27740.4
Control	sample05	0.3	3	4129	0.179038	23062.2
Control	sample05	0.3	4	301	0.0437121	6885.96
Control	sample05	0.3	5	890	0.0560713	15872.6
Control	sample05	0.3	6	1486	0.0406913	36518.8
Control	sample05	0.3	7	155	0.0194106	7985.34
Control	sample05	0.3	8	429	0.0194707	22033.2
Control	sample05	0.3	9	374	0.0161424	23168.8
Control	sample05	0.3	10	115	0.0114512	10042.6
Control	sample05	0.3	11	858	0.0140084	61249
Control	sample05	0.3	12	224	0.0103796	21580.8
Control	sample05	0.3	13	101	0.00577978	17474.7
Control	sample05	0.3	14	621	0.0103094	60236.1
Control	sample05	0.3	15	63	0.0115932	5434.21
Control	sample05	0.3	16	55	0.0057504	9564.55
Control	sample05	0.3	17	66	0.00436102	15134.1
Control	sample05	0.3	18	9	0.00607181	1482.26
Control	sample05	0.3	19	281	0.00573056	49035.3
Control	sample05	0.3	20	82	0.00830061	9878.79
Control	sample05	0.3	21	24	0.00408819	5870.57
Control	sample05	0.3	22	54	0.0048496	11134.9
Control	sample05	0.3	23	35	0.00559002	6261.16
Control	sample05	0.3	24	15	0.00292102	5135.19
Control	sample06	0.3	1	900863	43.1476	20878.6
Control	sample06	0.3	2	36831	1.09991	33485.4
Control	sample06	0.3	3	4482	0.186013	24095.1
Control	sample06	0.3	4	605	0.044644	13551.7
Control	sample06	0.3	5	1588	0.0830704	19116.3
Control	sample06	0.3	6	1501	0.0406116	36959.8
Control	sample06	0.3	7	53	0.0115244	4598.93
Control	sample06	0.3	8	162	0.019454	8327.33
Control	sample06	0.3	9	599	0.0182509	32820.2
Control	sample06	0.3	10	255	0.00924403	27585.4
Control	sample06	0.3	11	937	0.011779	79548.3
Control	sample06	0.3	12	22	0.00658099	3342.96
Control	sample06	0.3	13	41	0.0103116	3976.1
Control	sample06	0.3	14	461	0.00779136	59168.1
Control	sample06	0.3	15	39	0.00867238	4497.03
Control	sample06	0.3	16	13	0.00906022	1434.84
Control	sample06	0.3	17	76	0.00522982	14532
Control	sample06	0.3	18	3	0.00607341	493.957
Control	sample06	0.3	19	120	0.00555923	21585.7
Control	sample06	0.3	20	44	0.00645965	6811.52
Control	sample06	0.3	21	12	0.00628064	1910.63
Control	sample06	0.3	22	37	0.00547859	6753.56
Control	sample06	0.3	23	160	0.00397101	40292
Control	sample06	0.3	24	9	0.00150003	5999.87
Control	sample08	0.3	1	858873	40.6879	21108.8
Control	sample08	0.3	2	30286	1.08154	28002.6
Control	sample08	0.3	3	2392	0.179497	13326.1
Control	sample08	0.3	4	225	0.0476911	4717.86
Control	sample08	0.3	5	1446	0.0780714	18521.5
Control	sample08	0.3	6	634	0.0368888	17186.8
Control	sample08	0.3	7	147	0.0222926	6594.11
Control	sample08	0.3	8	190	0.0206892	9183.53
Control	sample08	0.3	9	338	0.0173009	19536.6
Control	sample08	0.3	10	38	0.0146898	2586.83
Control	sample08	0.3	11	226	0.0101501	22265.7
Control	sample08	0.3	12	21	0.0143942	1458.92
Control	sample08	0.3	13	4	0.00894022	447.416
Control	sample08	0.3	14	256	0.00565901	45237.6
Control	sample08	0.3	15	36	0.00950118	3789
Control	sample08	0.3	16	15	0.00846202	1772.63
Control	sample08	0.3	17	44	0.00555002	7927.91
Control	sample08	0.3	18	44	0.00699942	6286.23
Control	sample08	0.3	19	54	0.00589018	9167.81
Control	sample08	0.3	20	30	0.00404998	7407.44
Control	sample08	0.3	21	82	0.0055216	14850.8
Control	sample08	0.3	22	45	0.00496442	9064.51
Control	sample08	0.3	23	108	0.00395942	27276.7
Control	sample08	0.3	24	31	0.00336858	9202.7
Control	sample09	0.3	1	648537	43.5494	14892
Control	sample09	0.3	2	36165	1.20098	30112.9
Control	sample09	0.3	3	2742	0.168526	16270.5
Control	sample09	0.3	4	481	0.0491819	9780.02
Control	sample09	0.3	5	1003	0.0679343	14764.3
Control	sample09	0.3	6	739	0.0382927	19298.7
Control	sample09	0.3	7	143	0.0156066	9162.79
Control	sample09	0.3	8	271	0.0204878	13227.4
Control	sample09	0.3	9	514	0.0236703	21715
Control	sample09	0.3	10	124	0.0122024	10162
Control	sample09	0.3	11	674	0.011798	57128.2
Control	sample09	0.3	12	377	0.0119412	31571.4
Control	sample09	0.3	13	14	0.01102	1270.41
Control	sample09	0.3	14	313	0.00752077	41618.1
Control	sample09	0.3	15	99	0.00860083	11510.5
Control	sample09	0.3	16	42	0.00783962	5357.41
Control	sample09	0.3	17	6	0.00550163	1090.59
Control	sample09	0.3	18	5	0.00565824	883.667
Control	sample09	0.3	19	82	0.00643942	12734.1
Control	sample09	0.3	20	91	0.00619981	14677.9
Control	sample09	0.3	21	14	0.00437939	3196.79
Control	sample09	0.3	22	29	0.00455002	6373.6
Control	sample09	0.3	23	78	0.00360979	21607.9
Control	sample09	0.3	24	111	0.00234022	47431.4
Control	sample10	0.3	1	1214995	40.9477	29671.8
Control	sample10	0.3	2	38032	1.12018	33951.6
Control	sample10	0.3	3	3548	0.153893	23055
Control	sample10	0.3	4	556	0.0376648	14761.8
Control	sample10	0.3	5	647	0.038224	16926.5
Control	sample10	0.3	6	1022	0.0347494	29410.5
Control	sample10	0.3	7	483	0.0227944	21189.4
Control	sample10	0.3	8	362	0.0221426	16348.6
Control	sample10	0.3	9	337	0.015142	22256
Control	sample10	0.3	10	492	0.0239328	20557.6
Control	sample10	0.3	11	1107	0.0145385	76142.7
Control	sample10	0.3	12	381	0.0132904	28667.4
Control	sample10	0.3	13	7	0.00835962	837.359
Control	sample10	0.3	14	279	0.00807174	34565
Control	sample10	0.3	15	71	0.011982	5925.55
Control	sample10	0.3	16	35	0.00863981	4051.02
Control	sample10	0.3	17	52	0.00397094	13095.1
Control	sample10	0.3	18	20	0.00634944	3149.88
Control	sample10	0.3	19	260	0.00578963	44907.9
Control	sample10	0.3	20	25	0.00535866	4665.35
Control	sample10	0.3	21	42	0.00500282	8395.27
Control	sample10	0.3	22	56	0.0047296	11840.3
Control	sample10	0.3	23	146	0.00443264	32937.5
Control	sample10	0.3	24	35	0.00324224	10795
Isoflurane	sample11	0.3	1	154583	34.8879	4430.85
Isoflurane	sample11	0.3	2	14949	1.02402	14598.3
Isoflurane	sample11	0.3	3	885	0.16227	5453.87
Isoflurane	sample11	0.3	4	20	0.0402856	496.455
Isoflurane	sample11	0.3	5	227	0.0501959	4522.28
Isoflurane	sample11	0.3	6	211	0.0357865	5896.08
Isoflurane	sample11	0.3	7	80	0.0195512	4091.81
Isoflurane	sample11	0.3	8	80	0.0177144	4516.11
Isoflurane	sample11	0.3	9	49	0.0125028	3919.13
Isoflurane	sample11	0.3	10	87	0.010571	8230.06
Isoflurane	sample11	0.3	11	133	0.00850995	15628.8
Isoflurane	sample11	0.3	12	59	0.010402	5671.99
Isoflurane	sample11	0.3	13	48	0.0086208	5567.93
Isoflurane	sample11	0.3	14	53	0.00491859	10775.4
Isoflurane	sample11	0.3	15	70	0.00802022	8727.94
Isoflurane	sample11	0.3	16	3	0.00612262	489.986
Isoflurane	sample11	0.3	17	0	0.00644941	0
Isoflurane	sample11	0.3	18	11	0.00587936	1870.95
Isoflurane	sample11	0.3	19	3	0.00558003	537.631
Isoflurane	sample11	0.3	20	44	0.00512	8593.75
Isoflurane	sample11	0.3	21	2	0.0040192	497.611
Isoflurane	sample11	0.3	22	14	0.00375962	3723.78
Isoflurane	sample11	0.3	23	10	0.00369978	2702.87
Isoflurane	sample11	0.3	24	12	0.00275962	4348.43
Isoflurane	sample12	0.3	1	188423	37.8435	4979.01
Isoflurane	sample12	0.3	2	11965	1.12673	10619.2
Isoflurane	sample12	0.3	3	1213	0.175804	6899.73
Isoflurane	sample12	0.3	4	163	0.0534033	3052.24
Isoflurane	sample12	0.3	5	17	0.038372	443.032
Isoflurane	sample12	0.3	6	396	0.0825852	4795.05
Isoflurane	sample12	0.3	7	69	0.0175044	3941.86
Isoflurane	sample12	0.3	8	158	0.0185704	8508.15
Isoflurane	sample12	0.3	9	46	0.0157622	2918.38
Isoflurane	sample12	0.3	10	64	0.0098896	6471.44
Isoflurane	sample12	0.3	11	343	0.00920922	37245.3
Isoflurane	sample12	0.3	12	88	0.0121784	7225.89
Isoflurane	sample12	0.3	13	25	0.0098928	2527.09
Isoflurane	sample12	0.3	14	111	0.00594861	18659.8
Isoflurane	sample12	0.3	15	37	0.0081792	4523.67
Isoflurane	sample12	0.3	16	28	0.00711341	3936.23
Isoflurane	sample12	0.3	17	3	0.00527302	568.934
Isoflurane	sample12	0.3	18	2	0.00601101	332.723
Isoflurane	sample12	0.3	19	4	0.00560922	713.112
Isoflurane	sample12	0.3	20	70	0.00425958	16433.5
Isoflurane	sample12	0.3	21	2	0.00457997	436.684
Isoflurane	sample12	0.3	22	13	0.003872	3357.44
Isoflurane	sample12	0.3	23	22	0.00465901	4722.04
Isoflurane	sample12	0.3	24	65	0.00291936	22265.2
Isoflurane	sample13	0.3	1	197778	41.8125	4730.12
Isoflurane	sample13	0.3	2	20742	1.06392	19495.9
Isoflurane	sample13	0.3	3	1858	0.172272	10785.3
Isoflurane	sample13	0.3	4	253	0.0469059	5393.78
Isoflurane	sample13	0.3	5	79	0.0572261	1380.49
Isoflurane	sample13	0.3	6	421	0.03789	11111.1
Isoflurane	sample13	0.3	7	151	0.0220506	6847.88
Isoflurane	sample13	0.3	8	190	0.0214464	8859.3
Isoflurane	sample13	0.3	9	134	0.0131408	10197.2
Isoflurane	sample13	0.3	10	122	0.013288	9181.22
Isoflurane	sample13	0.3	11	176	0.0102796	17121.4
Isoflurane	sample13	0.3	12	38	0.0105312	3608.33
Isoflurane	sample13	0.3	13	12	0.00879885	1363.81
Isoflurane	sample13	0.3	14	89	0.007	12714.3
Isoflurane	sample13	0.3	15	25	0.00828141	3018.81
Isoflurane	sample13	0.3	16	32	0.00767078	4171.67
Isoflurane	sample13	0.3	17	1	0.00449914	222.265
Isoflurane	sample13	0.3	18	3	0.00754835	397.438
Isoflurane	sample13	0.3	19	13	0.00640186	2030.66
Isoflurane	sample13	0.3	20	16	0.00469242	3409.76
Isoflurane	sample13	0.3	21	3	0.00508998	589.393
Isoflurane	sample13	0.3	22	9	0.00402099	2238.25
Isoflurane	sample13	0.3	23	19	0.00440038	4317.8
Isoflurane	sample13	0.3	24	28	0.0024992	11203.6
Isoflurane	sample14	0.3	1	481104	44.0739	10915.8
Isoflurane	sample14	0.3	2	28248	1.16713	24203
Isoflurane	sample14	0.3	3	2574	0.181572	14176.2
Isoflurane	sample14	0.3	4	115	0.0484959	2371.33
Isoflurane	sample14	0.3	5	30	0.0418687	716.526
Isoflurane	sample14	0.3	6	717	0.0384814	18632.4
Isoflurane	sample14	0.3	7	255	0.0241894	10541.8
Isoflurane	sample14	0.3	8	72	0.0179805	4004.34
Isoflurane	sample14	0.3	9	145	0.0189738	7642.11
Isoflurane	sample14	0.3	10	140	0.0155896	8980.36
Isoflurane	sample14	0.3	11	303	0.0133096	22765.6
Isoflurane	sample14	0.3	12	524	0.0176389	29707
Isoflurane	sample14	0.3	13	44	0.00888115	4954.31
Isoflurane	sample14	0.3	14	79	0.00602022	13122.4
Isoflurane	sample14	0.3	15	68	0.0112624	6037.79
Isoflurane	sample14	0.3	16	40	0.0076896	5201.83
Isoflurane	sample14	0.3	17	6	0.0050784	1181.47
Isoflurane	sample14	0.3	18	6	0.00751955	797.92
Isoflurane	sample14	0.3	19	47	0.00571898	8218.25
Isoflurane	sample14	0.3	20	33	0.00590739	5586.22
Isoflurane	sample14	0.3	21	4	0.00541037	739.321
Isoflurane	sample14	0.3	22	28	0.0045392	6168.49
Isoflurane	sample14	0.3	23	36	0.00446176	8068.56
Isoflurane	sample14	0.3	24	22	0.00390035	5640.52
Isoflurane	sample16	0.3	1	188449	39.7362	4742.51
Isoflurane	sample16	0.3	2	22290	1.14251	19509.7
Isoflurane	sample16	0.3	3	1889	0.180067	10490.5
Isoflurane	sample16	0.3	4	73	0.0408779	1785.81
Isoflurane	sample16	0.3	5	56	0.0635987	880.521
Isoflurane	sample16	0.3	6	428	0.0371594	11517.9
Isoflurane	sample16	0.3	7	144	0.0213776	6736.02
Isoflurane	sample16	0.3	8	35	0.0173706	2014.9
Isoflurane	sample16	0.3	9	83	0.0161302	5145.64
Isoflurane	sample16	0.3	10	49	0.00939219	5217.1
Isoflurane	sample16	0.3	11	60	0.00961997	6237.03
Isoflurane	sample16	0.3	12	31	0.00738202	4199.39
Isoflurane	sample16	0.3	13	22	0.00894285	2460.07
Isoflurane	sample16	0.3	14	42	0.00560262	7496.49
Isoflurane	sample16	0.3	15	76	0.00929741	8174.32
Isoflurane	sample16	0.3	16	69	0.00601939	11463
Isoflurane	sample16	0.3	17	3	0.00683117	439.164
Isoflurane	sample16	0.3	18	1	0.00704083	142.029
Isoflurane	sample16	0.3	19	1	0.00610918	163.688
Isoflurane	sample16	0.3	20	47	0.00526061	8934.33
Isoflurane	sample16	0.3	21	2	0.00597101	334.952
Isoflurane	sample16	0.3	22	31	0.00468141	6621.94
Isoflurane	sample16	0.3	23	42	0.00442099	9500.13
Isoflurane	sample16	0.3	24	24	0.00348941	6877.96
Isoflurane	sample17	0.3	1	356453	37.4876	9508.56
Isoflurane	sample17	0.3	2	32616	1.26535	25776.2
Isoflurane	sample17	0.3	3	2310	0.166712	13856.2
Isoflurane	sample17	0.3	4	295	0.047413	6221.92
Isoflurane	sample17	0.3	5	448	0.0501884	8926.36
Isoflurane	sample17	0.3	6	653	0.0354909	18399.1
Isoflurane	sample17	0.3	7	60	0.0122374	4902.99
Isoflurane	sample17	0.3	8	134	0.0190763	7024.43
Isoflurane	sample17	0.3	9	111	0.01479	7505.06
Isoflurane	sample17	0.3	10	37	0.00656019	5640.08
Isoflurane	sample17	0.3	11	22	0.00770899	2853.81
Isoflurane	sample17	0.3	12	13	0.00711002	1828.41
Isoflurane	sample17	0.3	13	85	0.00749101	11346.9
Isoflurane	sample17	0.3	14	22	0.00642118	3426.16
Isoflurane	sample17	0.3	15	53	0.00907245	5841.86
Isoflurane	sample17	0.3	16	25	0.00454918	5495.49
Isoflurane	sample17	0.3	17	45	0.00592019	7601.1
Isoflurane	sample17	0.3	18	4	0.00701082	570.547
Isoflurane	sample17	0.3	19	141	0.00586861	24026.1
Isoflurane	sample17	0.3	20	47	0.00565178	8315.97
Isoflurane	sample17	0.3	21	6	0.00440115	1363.28
Isoflurane	sample17	0.3	22	73	0.00450182	16215.6
Isoflurane	sample17	0.3	23	78	0.003872	20144.6
Isoflurane	sample17	0.3	24	3	0.00235942	1271.5
Isoflurane	sample18	0.3	1	136904	36.8353	3716.65
Isoflurane	sample18	0.3	2	11595	1.13646	10202.7
Isoflurane	sample18	0.3	3	985	0.151794	6489.08
Isoflurane	sample18	0.3	4	108	0.0438038	2465.54
Isoflurane	sample18	0.3	5	19	0.0393985	482.252
Isoflurane	sample18	0.3	6	357	0.0372267	9589.89
Isoflurane	sample18	0.3	7	127	0.0245987	5162.88
Isoflurane	sample18	0.3	8	119	0.0172206	6910.33
Isoflurane	sample18	0.3	9	75	0.0135228	5546.18
Isoflurane	sample18	0.3	10	16	0.0136724	1170.24
Isoflurane	sample18	0.3	11	102	0.00925139	11025.4
Isoflurane	sample18	0.3	12	8	0.0145446	550.031
Isoflurane	sample18	0.3	13	28	0.00685062	4087.22
Isoflurane	sample18	0.3	14	13	0.00424058	3065.62
Isoflurane	sample18	0.3	15	75	0.00833043	9003.13
Isoflurane	sample18	0.3	16	62	0.00607898	10199.1
Isoflurane	sample18	0.3	17	8	0.00502099	1593.31
Isoflurane	sample18	0.3	18	2	0.00628058	318.442
Isoflurane	sample18	0.3	19	1	0.00603763	165.628
Isoflurane	sample18	0.3	20	14	0.00365984	3825.3
Isoflurane	sample18	0.3	21	3	0.00351002	854.697
Isoflurane	sample18	0.3	22	35	0.0037712	9280.87
Isoflurane	sample18	0.3	23	33	0.00439277	7512.35
Isoflurane	sample18	0.3	24	32	0.00315981	10127.2
Isoflurane	sample19	0.3	1	266706	41.3427	6451.1
Isoflurane	sample19	0.3	2	25677	1.18316	21702
Isoflurane	sample19	0.3	3	2640	0.178057	14826.7
Isoflurane	sample19	0.3	4	112	0.0392938	2850.32
Isoflurane	sample19	0.3	5	54	0.0522788	1032.92
Isoflurane	sample19	0.3	6	531	0.037313	14231
Isoflurane	sample19	0.3	7	199	0.0189382	10507.8
Isoflurane	sample19	0.3	8	72	0.0185123	3889.32
Isoflurane	sample19	0.3	9	185	0.017112	10811.1
Isoflurane	sample19	0.3	10	129	0.0110926	11629.4
Isoflurane	sample19	0.3	11	257	0.010918	23539.2
Isoflurane	sample19	0.3	12	386	0.0116194	33220.3
Isoflurane	sample19	0.3	13	23	0.00721818	3186.4
Isoflurane	sample19	0.3	14	85	0.00530861	16011.7
Isoflurane	sample19	0.3	15	103	0.00915002	11256.8
Isoflurane	sample19	0.3	16	40	0.00812102	4925.49
Isoflurane	sample19	0.3	17	9	0.00622982	1444.66
Isoflurane	sample19	0.3	18	1	0.0058096	172.129
Isoflurane	sample19	0.3	19	35	0.00702778	4980.24
Isoflurane	sample19	0.3	20	13	0.00675142	1925.52
Isoflurane	sample19	0.3	21	2	0.00463078	431.892
Isoflurane	sample19	0.3	22	44	0.00477894	9207.05
Isoflurane	sample19	0.3	23	58	0.0032496	17848.4
Isoflurane	sample19	0.3	24	57	0.00278042	20500.5
Isoflurane	sample20	0.3	1	478672	37.6987	12697.3
Isoflurane	sample20	0.3	2	32276	1.05247	30667
Isoflurane	sample20	0.3	3	2430	0.16459	14763.9
Isoflurane	sample20	0.3	4	227	0.0397389	5712.29
Isoflurane	sample20	0.3	5	321	0.0510347	6289.84
Isoflurane	sample20	0.3	6	1083	0.0374131	28947.1
Isoflurane	sample20	0.3	7	302	0.0242518	12452.7
Isoflurane	sample20	0.3	8	137	0.0177516	7717.64
Isoflurane	sample20	0.3	9	228	0.0143522	15886.1
Isoflurane	sample20	0.3	10	200	0.0194762	10268.9
Isoflurane	sample20	0.3	11	755	0.0118733	63588.2
Isoflurane	sample20	0.3	12	192	0.0122858	15627.8
Isoflurane	sample20	0.3	13	25	0.00647104	3863.37
Isoflurane	sample20	0.3	14	167	0.00507181	32927.1
Isoflurane	sample20	0.3	15	68	0.00831142	8181.51
Isoflurane	sample20	0.3	16	41	0.00656179	6248.29
Isoflurane	sample20	0.3	17	29	0.00468224	6193.62
Isoflurane	sample20	0.3	18	3	0.00592179	506.603
Isoflurane	sample20	0.3	19	23	0.00497261	4625.34
Isoflurane	sample20	0.3	20	36	0.00504102	7141.41
Isoflurane	sample20	0.3	21	11	0.00477062	2305.78
Isoflurane	sample20	0.3	22	58	0.00420979	13777.4
Isoflurane	sample20	0.3	23	89	0.00513222	17341.4
Isoflurane	sample20	0.3	24	88	0.0035792	24586.5

## Sheet: Control < Iso | cell densities
condition	sample	q_value	cluster_ID	pooled_cell_count	pooled_cluster_volume	cell_density
Control	sample01	0.005	1	4038	1.11465	3622.67
Control	sample01	0.005	2	867	0.755752	1147.2
Control	sample01	0.005	3	2489	0.719996	3456.96
Control	sample01	0.005	4	886	0.472266	1876.06
Control	sample01	0.005	5	1233	0.374361	3293.62
Control	sample01	0.005	6	1739	0.51479	3378.08
Control	sample01	0.005	7	876	0.260133	3367.51
Control	sample01	0.005	8	231	0.190128	1214.97
Control	sample01	0.005	9	190	0.173133	1097.42
Control	sample01	0.005	10	391	0.127978	3055.21
Control	sample01	0.005	11	473	0.170157	2779.79
Control	sample01	0.005	12	189	0.0937377	2016.26
Control	sample01	0.005	13	682	0.176389	3866.45
Control	sample01	0.005	14	138	0.121814	1132.87
Control	sample01	0.005	15	319	0.0559775	5698.71
Control	sample01	0.005	16	242	0.0452508	5347.97
Control	sample01	0.005	17	248	0.0386145	6422.45
Control	sample01	0.005	18	42	0.0231754	1812.26
Control	sample01	0.005	19	71	0.0291534	2435.39
Control	sample01	0.005	20	67	0.0102998	6505
Control	sample01	0.005	21	60	0.0139796	4291.95
Control	sample01	0.005	22	392	0.0173234	22628.4
Control	sample01	0.005	23	95	0.0217062	4376.62
Control	sample01	0.005	24	29	0.011863	2444.57
Control	sample01	0.005	25	54	0.0103206	5232.27
Control	sample01	0.005	26	42	0.011453	3667.16
Control	sample01	0.005	27	26	0.0149132	1743.43
Control	sample01	0.005	28	102	0.00907936	11234.3
Control	sample01	0.005	29	12	0.00628058	1910.65
Control	sample01	0.005	30	18	0.00471226	3819.83
Control	sample01	0.005	31	17	0.00620141	2741.31
Control	sample01	0.005	32	21	0.00562003	3736.63
Control	sample01	0.005	33	2	0.00948717	210.811
Control	sample01	0.005	34	22	0.0158214	1390.52
Control	sample01	0.005	35	33	0.0127232	2593.69
Control	sample01	0.005	36	2	0.00444198	450.249
Control	sample01	0.005	37	8	0.00367078	2179.37
Control	sample01	0.005	38	46	0.00327962	14026
Control	sample02	0.005	1	4261	1.24102	3433.47
Control	sample02	0.005	2	740	0.713062	1037.78
Control	sample02	0.005	3	3845	0.731164	5258.74
Control	sample02	0.005	4	531	0.401597	1322.22
Control	sample02	0.005	5	991	0.383541	2583.82
Control	sample02	0.005	6	696	0.377696	1842.75
Control	sample02	0.005	7	606	0.271647	2230.84
Control	sample02	0.005	8	453	0.17948	2523.95
Control	sample02	0.005	9	52	0.189888	273.845
Control	sample02	0.005	10	412	0.117048	3519.91
Control	sample02	0.005	11	516	0.204024	2529.11
Control	sample02	0.005	12	91	0.0900443	1010.61
Control	sample02	0.005	13	701	0.1568	4470.66
Control	sample02	0.005	14	56	0.107818	519.394
Control	sample02	0.005	15	377	0.0580467	6494.78
Control	sample02	0.005	16	424	0.0427815	9910.83
Control	sample02	0.005	17	278	0.0301592	9217.74
Control	sample02	0.005	18	26	0.0233974	1111.24
Control	sample02	0.005	19	58	0.0297825	1947.45
Control	sample02	0.005	20	69	0.0114818	6009.51
Control	sample02	0.005	21	68	0.0149814	4538.97
Control	sample02	0.005	22	418	0.0151328	27622.1
Control	sample02	0.005	23	27	0.012749	2117.81
Control	sample02	0.005	24	34	0.0104826	3243.46
Control	sample02	0.005	25	21	0.0071808	2924.47
Control	sample02	0.005	26	25	0.00942874	2651.47
Control	sample02	0.005	27	28	0.0125135	2237.58
Control	sample02	0.005	28	65	0.0078096	8323.09
Control	sample02	0.005	29	3	0.00516896	580.388
Control	sample02	0.005	30	15	0.00457971	3275.32
Control	sample02	0.005	31	17	0.00528883	3214.32
Control	sample02	0.005	32	23	0.00439776	5229.94
Control	sample02	0.005	33	0	0.00385939	0
Control	sample02	0.005	34	10	0.00873741	1144.5
Control	sample02	0.005	35	20	0.00980064	2040.68
Control	sample02	0.005	36	4	0.00442125	904.722
Control	sample02	0.005	37	24	0.00400102	5998.46
Control	sample02	0.005	38	12	0.00467059	2569.27
Control	sample05	0.005	1	5837	1.21127	4818.91
Control	sample05	0.005	2	3078	0.645666	4767.17
Control	sample05	0.005	3	3774	0.554894	6801.3
Control	sample05	0.005	4	1156	0.46442	2489.13
Control	sample05	0.005	5	2357	0.453702	5195.04
Control	sample05	0.005	6	3067	0.577646	5309.48
Control	sample05	0.005	7	1563	0.250696	6234.65
Control	sample05	0.005	8	718	0.171475	4187.2
Control	sample05	0.005	9	248	0.214686	1155.18
Control	sample05	0.005	10	871	0.166573	5228.94
Control	sample05	0.005	11	1330	0.189018	7036.35
Control	sample05	0.005	12	168	0.0959474	1750.96
Control	sample05	0.005	13	550	0.152361	3609.85
Control	sample05	0.005	14	218	0.128854	1691.84
Control	sample05	0.005	15	365	0.03404	10722.7
Control	sample05	0.005	16	485	0.0424831	11416.3
Control	sample05	0.005	17	361	0.0311566	11586.6
Control	sample05	0.005	18	40	0.0211827	1888.34
Control	sample05	0.005	19	118	0.0325834	3621.47
Control	sample05	0.005	20	40	0.00985619	4058.36
Control	sample05	0.005	21	75	0.016729	4483.24
Control	sample05	0.005	22	536	0.0144518	37088.9
Control	sample05	0.005	23	76	0.015533	4892.81
Control	sample05	0.005	24	16	0.00916998	1744.82
Control	sample05	0.005	25	22	0.00485037	4535.74
Control	sample05	0.005	26	39	0.0111	3513.5
Control	sample05	0.005	27	93	0.0126832	7332.53
Control	sample05	0.005	28	58	0.00571981	10140.2
Control	sample05	0.005	29	9	0.00529958	1698.25
Control	sample05	0.005	30	30	0.00711162	4218.45
Control	sample05	0.005	31	34	0.00547002	6215.7
Control	sample05	0.005	32	62	0.0039984	15506.2
Control	sample05	0.005	33	137	0.0104557	13102.8
Control	sample05	0.005	34	26	0.00997018	2607.78
Control	sample05	0.005	35	57	0.00794118	7177.77
Control	sample05	0.005	36	4	0.00316979	1261.91
Control	sample05	0.005	37	28	0.00354918	7889.14
Control	sample05	0.005	38	25	0.00319981	7812.97
Control	sample06	0.005	1	7795	1.18354	6586.18
Control	sample06	0.005	2	2501	0.713515	3505.18
Control	sample06	0.005	3	3661	0.687432	5325.62
Control	sample06	0.005	4	1133	0.417944	2710.89
Control	sample06	0.005	5	1886	0.406569	4638.82
Control	sample06	0.005	6	1660	0.428788	3871.38
Control	sample06	0.005	7	1318	0.253638	5196.38
Control	sample06	0.005	8	575	0.202152	2844.4
Control	sample06	0.005	9	345	0.202817	1701.04
Control	sample06	0.005	10	1067	0.116656	9146.53
Control	sample06	0.005	11	592	0.125339	4723.17
Control	sample06	0.005	12	154	0.10095	1525.51
Control	sample06	0.005	13	860	0.155522	5529.76
Control	sample06	0.005	14	233	0.109536	2127.15
Control	sample06	0.005	15	927	0.061507	15071.5
Control	sample06	0.005	16	429	0.0452026	9490.6
Control	sample06	0.005	17	317	0.0302427	10481.9
Control	sample06	0.005	18	74	0.0245908	3009.26
Control	sample06	0.005	19	135	0.0278168	4853.18
Control	sample06	0.005	20	111	0.010091	10999.9
Control	sample06	0.005	21	88	0.0132242	6654.47
Control	sample06	0.005	22	432	0.0175321	24640.5
Control	sample06	0.005	23	134	0.01565	8562.31
Control	sample06	0.005	24	77	0.0122084	6307.14
Control	sample06	0.005	25	82	0.00713978	11485
Control	sample06	0.005	26	36	0.00913082	3942.69
Control	sample06	0.005	27	61	0.0111092	5490.95
Control	sample06	0.005	28	85	0.00876915	9693.07
Control	sample06	0.005	29	8	0.00502163	1593.11
Control	sample06	0.005	30	37	0.00713837	5183.26
Control	sample06	0.005	31	31	0.00527059	5881.69
Control	sample06	0.005	32	13	0.00546362	2379.38
Control	sample06	0.005	33	4	0.00202918	1971.24
Control	sample06	0.005	34	43	0.00911098	4719.58
Control	sample06	0.005	35	59	0.00801261	7363.4
Control	sample06	0.005	36	1	0.00376064	265.912
Control	sample06	0.005	37	35	0.00427962	8178.3
Control	sample06	0.005	38	35	0.0029808	11741.8
Control	sample08	0.005	1	6862	1.274	5386.2
Control	sample08	0.005	2	2579	0.728251	3541.36
Control	sample08	0.005	3	3925	0.646729	6069.01
Control	sample08	0.005	4	682	0.444534	1534.19
Control	sample08	0.005	5	1138	0.396624	2869.22
Control	sample08	0.005	6	1945	0.502345	3871.84
Control	sample08	0.005	7	1205	0.259774	4638.65
Control	sample08	0.005	8	539	0.193337	2787.88
Control	sample08	0.005	9	467	0.210346	2220.15
Control	sample08	0.005	10	850	0.122966	6912.49
Control	sample08	0.005	11	850	0.115529	7357.48
Control	sample08	0.005	12	170	0.107822	1576.67
Control	sample08	0.005	13	761	0.141514	5377.54
Control	sample08	0.005	14	164	0.112134	1462.53
Control	sample08	0.005	15	370	0.0568012	6513.95
Control	sample08	0.005	16	358	0.0421856	8486.31
Control	sample08	0.005	17	326	0.0327971	9939.92
Control	sample08	0.005	18	42	0.0235332	1784.71
Control	sample08	0.005	19	66	0.028266	2334.96
Control	sample08	0.005	20	67	0.0107666	6222.95
Control	sample08	0.005	21	78	0.0154104	5061.53
Control	sample08	0.005	22	452	0.018853	23975
Control	sample08	0.005	23	85	0.0154198	5512.4
Control	sample08	0.005	24	30	0.011289	2657.45
Control	sample08	0.005	25	70	0.00766816	9128.66
Control	sample08	0.005	26	19	0.00935795	2030.36
Control	sample08	0.005	27	48	0.0107524	4464.1
Control	sample08	0.005	28	98	0.00872979	11225.9
Control	sample08	0.005	29	15	0.00723078	2074.46
Control	sample08	0.005	30	20	0.00615974	3246.89
Control	sample08	0.005	31	9	0.00514906	1747.89
Control	sample08	0.005	32	18	0.00490099	3672.73
Control	sample08	0.005	33	15	0.00539878	2778.4
Control	sample08	0.005	34	21	0.00997178	2105.94
Control	sample08	0.005	35	34	0.00780058	4358.65
Control	sample08	0.005	36	10	0.00454266	2201.36
Control	sample08	0.005	37	29	0.00436038	6650.79
Control	sample08	0.005	38	21	0.00451923	4646.81
Control	sample09	0.005	1	4820	1.15247	4182.31
Control	sample09	0.005	2	2355	0.702294	3353.3
Control	sample09	0.005	3	3474	0.657704	5282.01
Control	sample09	0.005	4	1389	0.410615	3382.73
Control	sample09	0.005	5	2574	0.412425	6241.14
Control	sample09	0.005	6	1529	0.463388	3299.61
Control	sample09	0.005	7	1745	0.250607	6963.1
Control	sample09	0.005	8	453	0.19244	2353.98
Control	sample09	0.005	9	149	0.197066	756.093
Control	sample09	0.005	10	957	0.134294	7126.16
Control	sample09	0.005	11	589	0.141138	4173.23
Control	sample09	0.005	12	319	0.0905091	3524.51
Control	sample09	0.005	13	555	0.134562	4124.49
Control	sample09	0.005	14	260	0.122581	2121.05
Control	sample09	0.005	15	829	0.0464419	17850.3
Control	sample09	0.005	16	335	0.041089	8153.03
Control	sample09	0.005	17	174	0.0284284	6120.64
Control	sample09	0.005	18	74	0.0245283	3016.92
Control	sample09	0.005	19	63	0.0288934	2180.43
Control	sample09	0.005	20	125	0.00700365	17847.8
Control	sample09	0.005	21	75	0.014169	5293.24
Control	sample09	0.005	22	421	0.0152684	27573.3
Control	sample09	0.005	23	48	0.0142074	3378.53
Control	sample09	0.005	24	36	0.0113796	3163.54
Control	sample09	0.005	25	33	0.00820723	4020.84
Control	sample09	0.005	26	45	0.00905344	4970.49
Control	sample09	0.005	27	61	0.0102116	5973.57
Control	sample09	0.005	28	56	0.0075408	7426.27
Control	sample09	0.005	29	9	0.00600179	1499.55
Control	sample09	0.005	30	8	0.00566899	1411.19
Control	sample09	0.005	31	14	0.00507078	2760.91
Control	sample09	0.005	32	36	0.00616218	5842.09
Control	sample09	0.005	33	27	0.00610739	4420.87
Control	sample09	0.005	34	29	0.0133588	2170.85
Control	sample09	0.005	35	42	0.00984058	4268.04
Control	sample09	0.005	36	13	0.00281862	4612.18
Control	sample09	0.005	37	17	0.00300922	5649.31
Control	sample09	0.005	38	39	0.00329958	11819.7
Control	sample10	0.005	1	8126	1.33638	6080.59
Control	sample10	0.005	2	2829	0.724394	3905.33
Control	sample10	0.005	3	4812	0.615728	7815.13
Control	sample10	0.005	4	1384	0.444031	3116.9
Control	sample10	0.005	5	2098	0.413145	5078.12
Control	sample10	0.005	6	2542	0.494222	5143.44
Control	sample10	0.005	7	1917	0.276101	6943.12
Control	sample10	0.005	8	505	0.186211	2711.98
Control	sample10	0.005	9	271	0.217622	1245.28
Control	sample10	0.005	10	1025	0.105713	9696.04
Control	sample10	0.005	11	1918	0.270566	7088.84
Control	sample10	0.005	12	199	0.0842086	2363.18
Control	sample10	0.005	13	1192	0.166533	7157.75
Control	sample10	0.005	14	257	0.109742	2341.85
Control	sample10	0.005	15	645	0.0564755	11420.9
Control	sample10	0.005	16	436	0.0400894	10875.7
Control	sample10	0.005	17	328	0.0291681	11245.2
Control	sample10	0.005	18	102	0.0229123	4451.77
Control	sample10	0.005	19	138	0.0277669	4969.94
Control	sample10	0.005	20	118	0.0116228	10152.5
Control	sample10	0.005	21	80	0.0145553	5496.29
Control	sample10	0.005	22	521	0.0184207	28283.3
Control	sample10	0.005	23	51	0.01572	3244.27
Control	sample10	0.005	24	75	0.0124694	6014.7
Control	sample10	0.005	25	48	0.00864083	5555.02
Control	sample10	0.005	26	58	0.0109228	5309.99
Control	sample10	0.005	27	49	0.00951936	5147.4
Control	sample10	0.005	28	74	0.00825242	8967.07
Control	sample10	0.005	29	14	0.00657082	2130.63
Control	sample10	0.005	30	56	0.00542202	10328.3
Control	sample10	0.005	31	29	0.00452179	6413.39
Control	sample10	0.005	32	36	0.00487962	7377.63
Control	sample10	0.005	33	0	0.00391757	0
Control	sample10	0.005	34	16	0.0100399	1593.64
Control	sample10	0.005	35	33	0.00890182	3707.11
Control	sample10	0.005	36	5	0.00366982	1362.46
Control	sample10	0.005	37	34	0.00370982	9164.86
Control	sample10	0.005	38	37	0.00495104	7473.18
Isoflurane	sample11	0.005	1	9923	1.08382	9155.61
Isoflurane	sample11	0.005	2	8340	0.63308	13173.7
Isoflurane	sample11	0.005	3	5297	0.518836	10209.4
Isoflurane	sample11	0.005	4	2976	0.400561	7429.58
Isoflurane	sample11	0.005	5	5583	0.359925	15511.6
Isoflurane	sample11	0.005	6	3505	0.472329	7420.67
Isoflurane	sample11	0.005	7	2860	0.233036	12272.8
Isoflurane	sample11	0.005	8	2187	0.163321	13390.8
Isoflurane	sample11	0.005	9	1096	0.188734	5807.13
Isoflurane	sample11	0.005	10	1645	0.12882	12769.7
Isoflurane	sample11	0.005	11	1380	0.123754	11151.1
Isoflurane	sample11	0.005	12	873	0.103083	8468.88
Isoflurane	sample11	0.005	13	1141	0.142517	8006.05
Isoflurane	sample11	0.005	14	508	0.0916268	5544.23
Isoflurane	sample11	0.005	15	1876	0.0468954	40003.9
Isoflurane	sample11	0.005	16	803	0.0465304	17257.5
Isoflurane	sample11	0.005	17	743	0.0268561	27665.9
Isoflurane	sample11	0.005	18	171	0.0217817	7850.63
Isoflurane	sample11	0.005	19	116	0.0248452	4668.9
Isoflurane	sample11	0.005	20	163	0.00709658	22968.8
Isoflurane	sample11	0.005	21	60	0.0134112	4473.87
Isoflurane	sample11	0.005	22	613	0.0151742	40397.5
Isoflurane	sample11	0.005	23	42	0.013388	3137.13
Isoflurane	sample11	0.005	24	35	0.010609	3299.08
Isoflurane	sample11	0.005	25	161	0.00679962	23677.8
Isoflurane	sample11	0.005	26	53	0.00804858	6585.02
Isoflurane	sample11	0.005	27	117	0.00864	13541.7
Isoflurane	sample11	0.005	28	113	0.0072208	15649.2
Isoflurane	sample11	0.005	29	3	0.00542938	552.55
Isoflurane	sample11	0.005	30	61	0.00482803	12634.5
Isoflurane	sample11	0.005	31	16	0.00479059	3339.88
Isoflurane	sample11	0.005	32	73	0.0046208	15798.1
Isoflurane	sample11	0.005	33	27	0.00534035	5055.85
Isoflurane	sample11	0.005	34	50	0.0078912	6336.17
Isoflurane	sample11	0.005	35	20	0.00519142	3852.51
Isoflurane	sample11	0.005	36	13	0.00364064	3570.8
Isoflurane	sample11	0.005	37	47	0.00351078	13387.3
Isoflurane	sample11	0.005	38	45	0.00378221	11897.8
Isoflurane	sample12	0.005	1	8785	1.06129	8277.64
Isoflurane	sample12	0.005	2	8096	0.628187	12887.9
Isoflurane	sample12	0.005	3	7048	0.637235	11060.3
Isoflurane	sample12	0.005	4	2224	0.406966	5464.83
Isoflurane	sample12	0.005	5	5223	0.376873	13858.8
Isoflurane	sample12	0.005	6	2748	0.486512	5648.37
Isoflurane	sample12	0.005	7	2263	0.217615	10399.1
Isoflurane	sample12	0.005	8	2776	0.163213	17008.5
Isoflurane	sample12	0.005	9	2441	0.191122	12772
Isoflurane	sample12	0.005	10	1501	0.12209	12294.2
Isoflurane	sample12	0.005	11	2445	0.179755	13601.8
Isoflurane	sample12	0.005	12	873	0.0899562	9704.72
Isoflurane	sample12	0.005	13	1469	0.165867	8856.49
Isoflurane	sample12	0.005	14	287	0.105569	2718.6
Isoflurane	sample12	0.005	15	2295	0.047881	47931.3
Isoflurane	sample12	0.005	16	864	0.0515178	16770.9
Isoflurane	sample12	0.005	17	710	0.0412408	17216
Isoflurane	sample12	0.005	18	171	0.020177	8475.01
Isoflurane	sample12	0.005	19	127	0.0245122	5181.1
Isoflurane	sample12	0.005	20	325	0.0106526	30509
Isoflurane	sample12	0.005	21	34	0.0142582	2384.6
Isoflurane	sample12	0.005	22	632	0.0151826	41626.6
Isoflurane	sample12	0.005	23	162	0.0169512	9556.86
Isoflurane	sample12	0.005	24	75	0.00910176	8240.16
Isoflurane	sample12	0.005	25	225	0.00810835	27749.2
Isoflurane	sample12	0.005	26	43	0.00630304	6822.1
Isoflurane	sample12	0.005	27	76	0.0148607	5114.17
Isoflurane	sample12	0.005	28	127	0.00756998	16776.8
Isoflurane	sample12	0.005	29	2	0.00496198	403.065
Isoflurane	sample12	0.005	30	57	0.00409997	13902.5
Isoflurane	sample12	0.005	31	17	0.00437024	3889.95
Isoflurane	sample12	0.005	32	50	0.00401837	12442.9
Isoflurane	sample12	0.005	33	19	0.00693126	2741.2
Isoflurane	sample12	0.005	34	6	0.010208	587.774
Isoflurane	sample12	0.005	35	35	0.012808	2732.67
Isoflurane	sample12	0.005	36	16	0.00375962	4255.75
Isoflurane	sample12	0.005	37	114	0.00570982	19965.6
Isoflurane	sample12	0.005	38	89	0.00422957	21042.3
Isoflurane	sample13	0.005	1	28051	1.23398	22732.2
Isoflurane	sample13	0.005	2	7795	0.701558	11111
Isoflurane	sample13	0.005	3	7149	0.709351	10078.2
Isoflurane	sample13	0.005	4	4287	0.405178	10580.5
Isoflurane	sample13	0.005	5	5750	0.41365	13900.6
Isoflurane	sample13	0.005	6	3209	0.43834	7320.8
Isoflurane	sample13	0.005	7	4695	0.252985	18558.4
Isoflurane	sample13	0.005	8	3080	0.187838	16397.1
Isoflurane	sample13	0.005	9	2073	0.192894	10746.8
Isoflurane	sample13	0.005	10	2185	0.124269	17582.8
Isoflurane	sample13	0.005	11	1249	0.114	10956.1
Isoflurane	sample13	0.005	12	1246	0.0901562	13820.5
Isoflurane	sample13	0.005	13	3578	0.173249	20652.4
Isoflurane	sample13	0.005	14	805	0.106728	7542.52
Isoflurane	sample13	0.005	15	3167	0.0499252	63434.9
Isoflurane	sample13	0.005	16	525	0.0409124	12832.3
Isoflurane	sample13	0.005	17	724	0.0287682	25166.7
Isoflurane	sample13	0.005	18	126	0.0203082	6204.38
Isoflurane	sample13	0.005	19	162	0.0261521	6194.52
Isoflurane	sample13	0.005	20	221	0.00816403	27070
Isoflurane	sample13	0.005	21	200	0.0136998	14598.8
Isoflurane	sample13	0.005	22	1095	0.0195796	55925.6
Isoflurane	sample13	0.005	23	179	0.0171122	10460.4
Isoflurane	sample13	0.005	24	125	0.0102232	12227.1
Isoflurane	sample13	0.005	25	170	0.00721158	23573.2
Isoflurane	sample13	0.005	26	72	0.00892858	8064
Isoflurane	sample13	0.005	27	84	0.00978726	8582.58
Isoflurane	sample13	0.005	28	195	0.00938202	20784.4
Isoflurane	sample13	0.005	29	14	0.00525222	2665.54
Isoflurane	sample13	0.005	30	63	0.00434016	14515.6
Isoflurane	sample13	0.005	31	50	0.00629037	7948.66
Isoflurane	sample13	0.005	32	169	0.0060608	27884.1
Isoflurane	sample13	0.005	33	13	0.00389971	3333.58
Isoflurane	sample13	0.005	34	62	0.0108234	5728.32
Isoflurane	sample13	0.005	35	80	0.00867123	9225.91
Isoflurane	sample13	0.005	36	16	0.00448077	3570.82
Isoflurane	sample13	0.005	37	42	0.00273882	15335.1
Isoflurane	sample13	0.005	38	52	0.00378042	13755.1
Isoflurane	sample14	0.005	1	31096	1.24937	24889.3
Isoflurane	sample14	0.005	2	9744	0.689502	14131.9
Isoflurane	sample14	0.005	3	7839	0.618172	12680.9
Isoflurane	sample14	0.005	4	6505	0.451379	14411.4
Isoflurane	sample14	0.005	5	6672	0.398182	16756.2
Isoflurane	sample14	0.005	6	4479	0.427843	10468.8
Isoflurane	sample14	0.005	7	5763	0.272041	21184.3
Isoflurane	sample14	0.005	8	2855	0.19375	14735.5
Isoflurane	sample14	0.005	9	2440	0.203791	11973
Isoflurane	sample14	0.005	10	2512	0.114369	21964.1
Isoflurane	sample14	0.005	11	4420	0.21146	20902.3
Isoflurane	sample14	0.005	12	2049	0.104912	19530.7
Isoflurane	sample14	0.005	13	3459	0.141941	24369.3
Isoflurane	sample14	0.005	14	826	0.108637	7603.29
Isoflurane	sample14	0.005	15	3575	0.0534495	66885.6
Isoflurane	sample14	0.005	16	869	0.0450483	19290.4
Isoflurane	sample14	0.005	17	1096	0.0302716	36205.5
Isoflurane	sample14	0.005	18	402	0.0209712	19169.1
Isoflurane	sample14	0.005	19	336	0.027362	12279.8
Isoflurane	sample14	0.005	20	412	0.0119402	34505.4
Isoflurane	sample14	0.005	21	228	0.0137076	16633.1
Isoflurane	sample14	0.005	22	611	0.0133196	45872.2
Isoflurane	sample14	0.005	23	323	0.0200904	16077.4
Isoflurane	sample14	0.005	24	178	0.00962982	18484.2
Isoflurane	sample14	0.005	25	187	0.00665146	28114.1
Isoflurane	sample14	0.005	26	112	0.0100236	11173.6
Isoflurane	sample14	0.005	27	178	0.00849939	20942.7
Isoflurane	sample14	0.005	28	245	0.00901203	27185.9
Isoflurane	sample14	0.005	29	52	0.00602157	8635.62
Isoflurane	sample14	0.005	30	194	0.0051705	37520.6
Isoflurane	sample14	0.005	31	126	0.0085392	14755.5
Isoflurane	sample14	0.005	32	110	0.00432038	25460.7
Isoflurane	sample14	0.005	33	2	0.0057104	350.238
Isoflurane	sample14	0.005	34	70	0.0123324	5676.1
Isoflurane	sample14	0.005	35	158	0.00982982	16073.5
Isoflurane	sample14	0.005	36	18	0.00420979	4275.75
Isoflurane	sample14	0.005	37	71	0.0027904	25444.4
Isoflurane	sample14	0.005	38	59	0.00307341	19196.9
Isoflurane	sample16	0.005	1	15016	1.20229	12489.5
Isoflurane	sample16	0.005	2	8976	0.708118	12675.8
Isoflurane	sample16	0.005	3	6741	0.578627	11650
Isoflurane	sample16	0.005	4	2999	0.434736	6898.44
Isoflurane	sample16	0.005	5	6616	0.403357	16402.4
Isoflurane	sample16	0.005	6	5605	0.470403	11915.3
Isoflurane	sample16	0.005	7	2814	0.237791	11833.9
Isoflurane	sample16	0.005	8	2116	0.177722	11906.2
Isoflurane	sample16	0.005	9	776	0.214073	3624.94
Isoflurane	sample16	0.005	10	1564	0.123295	12685.1
Isoflurane	sample16	0.005	11	2570	0.131974	19473.5
Isoflurane	sample16	0.005	12	607	0.105646	5745.62
Isoflurane	sample16	0.005	13	2186	0.148294	14741
Isoflurane	sample16	0.005	14	606	0.103713	5843.02
Isoflurane	sample16	0.005	15	2653	0.0579208	45804
Isoflurane	sample16	0.005	16	927	0.0448323	20677
Isoflurane	sample16	0.005	17	815	0.0295421	27587.7
Isoflurane	sample16	0.005	18	117	0.0220321	5310.44
Isoflurane	sample16	0.005	19	117	0.0240749	4859.82
Isoflurane	sample16	0.005	20	405	0.012347	32801.5
Isoflurane	sample16	0.005	21	77	0.01571	4901.33
Isoflurane	sample16	0.005	22	576	0.0143782	40060.7
Isoflurane	sample16	0.005	23	127	0.0170616	7443.6
Isoflurane	sample16	0.005	24	31	0.00925798	3348.46
Isoflurane	sample16	0.005	25	148	0.00796179	18588.8
Isoflurane	sample16	0.005	26	94	0.00858323	10951.6
Isoflurane	sample16	0.005	27	147	0.01263	11638.9
Isoflurane	sample16	0.005	28	152	0.00744858	20406.6
Isoflurane	sample16	0.005	29	13	0.00493184	2635.93
Isoflurane	sample16	0.005	30	36	0.00603923	5961.02
Isoflurane	sample16	0.005	31	19	0.00508979	3732.96
Isoflurane	sample16	0.005	32	118	0.00494176	23878.1
Isoflurane	sample16	0.005	33	75	0.0048704	15399.1
Isoflurane	sample16	0.005	34	72	0.00883302	8151.23
Isoflurane	sample16	0.005	35	56	0.00724141	7733.3
Isoflurane	sample16	0.005	36	7	0.00337018	2077.04
Isoflurane	sample16	0.005	37	48	0.0027504	17452
Isoflurane	sample16	0.005	38	21	0.00403258	5207.59
Isoflurane	sample17	0.005	1	13576	1.07219	12661.9
Isoflurane	sample17	0.005	2	8893	0.581991	15280.3
Isoflurane	sample17	0.005	3	7815	0.547192	14282
Isoflurane	sample17	0.005	4	5026	0.412851	12173.9
Isoflurane	sample17	0.005	5	5943	0.392292	15149.4
Isoflurane	sample17	0.005	6	6452	0.461952	13966.8
Isoflurane	sample17	0.005	7	3348	0.218503	15322.4
Isoflurane	sample17	0.005	8	2572	0.171447	15001.7
Isoflurane	sample17	0.005	9	1326	0.192388	6892.34
Isoflurane	sample17	0.005	10	2205	0.122187	18046.1
Isoflurane	sample17	0.005	11	5116	0.216134	23670.5
Isoflurane	sample17	0.005	12	744	0.085991	8652.07
Isoflurane	sample17	0.005	13	1430	0.136912	10444.7
Isoflurane	sample17	0.005	14	647	0.0960015	6739.48
Isoflurane	sample17	0.005	15	2320	0.04602	50412.9
Isoflurane	sample17	0.005	16	834	0.0429802	19404.3
Isoflurane	sample17	0.005	17	774	0.0277646	27877.2
Isoflurane	sample17	0.005	18	332	0.0218867	15169.1
Isoflurane	sample17	0.005	19	159	0.0243303	6535.06
Isoflurane	sample17	0.005	20	243	0.00870899	27902.2
Isoflurane	sample17	0.005	21	59	0.0127498	4627.51
Isoflurane	sample17	0.005	22	506	0.0129902	38952.4
Isoflurane	sample17	0.005	23	191	0.015567	12269.6
Isoflurane	sample17	0.005	24	58	0.00991117	5851.98
Isoflurane	sample17	0.005	25	118	0.00613242	19242
Isoflurane	sample17	0.005	26	78	0.00839962	9286.14
Isoflurane	sample17	0.005	27	173	0.00912998	18948.6
Isoflurane	sample17	0.005	28	234	0.00773901	30236.4
Isoflurane	sample17	0.005	29	8	0.00514221	1555.75
Isoflurane	sample17	0.005	30	43	0.0061024	7046.41
Isoflurane	sample17	0.005	31	49	0.00547021	8957.61
Isoflurane	sample17	0.005	32	100	0.00462157	21637.7
Isoflurane	sample17	0.005	33	29	0.00278202	10424.1
Isoflurane	sample17	0.005	34	87	0.00531123	16380.4
Isoflurane	sample17	0.005	35	140	0.00773139	18108
Isoflurane	sample17	0.005	36	8	0.00320563	2495.61
Isoflurane	sample17	0.005	37	75	0.00321139	23354.4
Isoflurane	sample17	0.005	38	18	0.00173958	10347.3
Isoflurane	sample18	0.005	1	6784	1.07409	6316.07
Isoflurane	sample18	0.005	2	7867	0.62918	12503.6
Isoflurane	sample18	0.005	3	5262	0.549718	9572.19
Isoflurane	sample18	0.005	4	1857	0.390124	4760.02
Isoflurane	sample18	0.005	5	3628	0.358918	10108.2
Isoflurane	sample18	0.005	6	2031	0.446499	4548.72
Isoflurane	sample18	0.005	7	2384	0.238387	10000.6
Isoflurane	sample18	0.005	8	2487	0.17229	14434.9
Isoflurane	sample18	0.005	9	960	0.187544	5118.8
Isoflurane	sample18	0.005	10	1163	0.116265	10003
Isoflurane	sample18	0.005	11	2442	0.207147	11788.7
Isoflurane	sample18	0.005	12	553	0.0793612	6968.14
Isoflurane	sample18	0.005	13	1070	0.157958	6773.94
Isoflurane	sample18	0.005	14	278	0.0948337	2931.45
Isoflurane	sample18	0.005	15	1247	0.0474248	26294.3
Isoflurane	sample18	0.005	16	595	0.0392246	15169.1
Isoflurane	sample18	0.005	17	561	0.023919	23454.2
Isoflurane	sample18	0.005	18	161	0.0211537	7610.97
Isoflurane	sample18	0.005	19	82	0.0236428	3468.29
Isoflurane	sample18	0.005	20	127	0.0112512	11287.7
Isoflurane	sample18	0.005	21	48	0.0118006	4067.58
Isoflurane	sample18	0.005	22	458	0.0144498	31696
Isoflurane	sample18	0.005	23	97	0.01557	6229.94
Isoflurane	sample18	0.005	24	40	0.00826899	4837.35
Isoflurane	sample18	0.005	25	63	0.00641203	9825.28
Isoflurane	sample18	0.005	26	40	0.00818163	4889
Isoflurane	sample18	0.005	27	95	0.00980378	9690.14
Isoflurane	sample18	0.005	28	170	0.00571898	29725.6
Isoflurane	sample18	0.005	29	8	0.00527904	1515.43
Isoflurane	sample18	0.005	30	34	0.0046416	7325.06
Isoflurane	sample18	0.005	31	24	0.00469082	5116.38
Isoflurane	sample18	0.005	32	55	0.003832	14352.8
Isoflurane	sample18	0.005	33	18	0.00490118	3672.58
Isoflurane	sample18	0.005	34	25	0.00806816	3098.6
Isoflurane	sample18	0.005	35	31	0.00842778	3678.31
Isoflurane	sample18	0.005	36	5	0.00384038	1301.95
Isoflurane	sample18	0.005	37	77	0.00307078	25075
Isoflurane	sample18	0.005	38	22	0.00296	7432.43
Isoflurane	sample19	0.005	1	24648	1.24956	19725.4
Isoflurane	sample19	0.005	2	9022	0.629554	14330.8
Isoflurane	sample19	0.005	3	7735	0.587446	13167.2
Isoflurane	sample19	0.005	4	3662	0.38897	9414.61
Isoflurane	sample19	0.005	5	6365	0.407083	15635.6
Isoflurane	sample19	0.005	6	5098	0.471206	10819
Isoflurane	sample19	0.005	7	4769	0.263122	18124.7
Isoflurane	sample19	0.005	8	2409	0.179849	13394.6
Isoflurane	sample19	0.005	9	1018	0.206977	4918.42
Isoflurane	sample19	0.005	10	2178	0.119216	18269.3
Isoflurane	sample19	0.005	11	4100	0.176116	23280.1
Isoflurane	sample19	0.005	12	1052	0.0928605	11328.8
Isoflurane	sample19	0.005	13	3106	0.156821	19806
Isoflurane	sample19	0.005	14	775	0.104575	7410.93
Isoflurane	sample19	0.005	15	3071	0.0500621	61343.8
Isoflurane	sample19	0.005	16	888	0.041775	21256.7
Isoflurane	sample19	0.005	17	893	0.025071	35618.9
Isoflurane	sample19	0.005	18	399	0.024151	16521.1
Isoflurane	sample19	0.005	19	208	0.0291602	7133.01
Isoflurane	sample19	0.005	20	402	0.0160746	25008.4
Isoflurane	sample19	0.005	21	121	0.012899	9380.57
Isoflurane	sample19	0.005	22	671	0.01519	44173.8
Isoflurane	sample19	0.005	23	162	0.011848	13673.2
Isoflurane	sample19	0.005	24	102	0.0116892	8725.99
Isoflurane	sample19	0.005	25	171	0.00678976	25185
Isoflurane	sample19	0.005	26	118	0.00849203	13895.4
Isoflurane	sample19	0.005	27	164	0.00852224	19243.8
Isoflurane	sample19	0.005	28	181	0.00744179	24322.1
Isoflurane	sample19	0.005	29	28	0.00413901	6764.91
Isoflurane	sample19	0.005	30	92	0.00663002	13876.3
Isoflurane	sample19	0.005	31	68	0.00553939	12275.7
Isoflurane	sample19	0.005	32	72	0.00432864	16633.4
Isoflurane	sample19	0.005	33	45	0.00531802	8461.8
Isoflurane	sample19	0.005	34	54	0.00939712	5746.44
Isoflurane	sample19	0.005	35	80	0.00631962	12659
Isoflurane	sample19	0.005	36	9	0.00404083	2227.26
Isoflurane	sample19	0.005	37	83	0.00463219	17918.1
Isoflurane	sample19	0.005	38	86	0.00360979	23824.1
Isoflurane	sample20	0.005	1	25663	1.1674	21983
Isoflurane	sample20	0.005	2	11174	0.610921	18290.4
Isoflurane	sample20	0.005	3	8815	0.529365	16652
Isoflurane	sample20	0.005	4	4873	0.411163	11851.8
Isoflurane	sample20	0.005	5	6098	0.398868	15288.3
Isoflurane	sample20	0.005	6	4928	0.45952	10724.2
Isoflurane	sample20	0.005	7	5653	0.234569	24099.6
Isoflurane	sample20	0.005	8	3002	0.175528	17102.7
Isoflurane	sample20	0.005	9	2358	0.186138	12668
Isoflurane	sample20	0.005	10	2363	0.121553	19440.1
Isoflurane	sample20	0.005	11	2274	0.137154	16579.9
Isoflurane	sample20	0.005	12	1493	0.0779879	19144
Isoflurane	sample20	0.005	13	3428	0.175586	19523.2
Isoflurane	sample20	0.005	14	779	0.103884	7498.73
Isoflurane	sample20	0.005	15	3005	0.0511514	58747.1
Isoflurane	sample20	0.005	16	952	0.0394126	24154.7
Isoflurane	sample20	0.005	17	877	0.0250412	35022.3
Isoflurane	sample20	0.005	18	246	0.0216638	11355.3
Isoflurane	sample20	0.005	19	356	0.0251631	14147.7
Isoflurane	sample20	0.005	20	399	0.0122126	32671.2
Isoflurane	sample20	0.005	21	162	0.0139236	11634.9
Isoflurane	sample20	0.005	22	825	0.0137684	59919.9
Isoflurane	sample20	0.005	23	220	0.0157688	13951.6
Isoflurane	sample20	0.005	24	131	0.00810099	16170.9
Isoflurane	sample20	0.005	25	145	0.00654605	22150.8
Isoflurane	sample20	0.005	26	71	0.00772819	9187.14
Isoflurane	sample20	0.005	27	251	0.0120012	20914.5
Isoflurane	sample20	0.005	28	269	0.00753158	35716.3
Isoflurane	sample20	0.005	29	20	0.00526138	3801.29
Isoflurane	sample20	0.005	30	130	0.00549939	23639
Isoflurane	sample20	0.005	31	91	0.00566899	16052.2
Isoflurane	sample20	0.005	32	119	0.00437696	27187.8
Isoflurane	sample20	0.005	33	9	0.0024951	3607.06
Isoflurane	sample20	0.005	34	45	0.0048992	9185.17
Isoflurane	sample20	0.005	35	208	0.00901094	23083
Isoflurane	sample20	0.005	36	24	0.00404	5940.59
Isoflurane	sample20	0.005	37	114	0.00315078	36181.5
Isoflurane	sample20	0.005	38	66	0.00240077	27491.2
Control	sample01	0.01	1	34244	11.2337	3048.32
Control	sample01	0.01	2	9269	2.73014	3395.06
Control	sample01	0.01	3	6765	1.95106	3467.35
Control	sample01	0.01	4	2535	0.341333	7426.77
Control	sample01	0.01	5	371	0.272695	1360.5
Control	sample01	0.01	6	961	0.425583	2258.08
Control	sample01	0.01	7	312	0.135898	2295.84
Control	sample01	0.01	8	294	0.0585154	5024.32
Control	sample01	0.01	9	95	0.0986264	963.231
Control	sample01	0.01	10	380	0.0790239	4808.67
Control	sample01	0.01	11	58	0.124036	467.606
Control	sample01	0.01	12	93	0.0381672	2436.65
Control	sample01	0.01	13	84	0.0341514	2459.63
Control	sample01	0.01	14	82	0.0291298	2814.99
Control	sample01	0.01	15	65	0.0243037	2674.49
Control	sample01	0.01	16	27	0.032378	833.9
Control	sample01	0.01	17	15	0.0207294	723.61
Control	sample01	0.01	18	113	0.0205954	5486.66
Control	sample01	0.01	19	33	0.0167044	1975.53
Control	sample01	0.01	20	1	0.00150886	662.75
Control	sample01	0.01	21	25	0.0221568	1128.32
Control	sample01	0.01	22	69	0.0157964	4368.1
Control	sample01	0.01	23	0	0.00977843	0
Control	sample01	0.01	24	25	0.0104596	2390.15
Control	sample01	0.01	25	9	0.0147176	611.511
Control	sample01	0.01	26	93	0.00974406	9544.27
Control	sample01	0.01	27	29	0.00816915	3549.94
Control	sample01	0.01	28	34	0.0089104	3815.77
Control	sample01	0.01	29	166	0.0116708	14223.5
Control	sample01	0.01	30	72	0.00898022	8017.62
Control	sample01	0.01	31	311	0.0134883	23057.1
Control	sample01	0.01	32	41	0.00803942	5099.87
Control	sample01	0.01	33	33	0.0086816	3801.14
Control	sample01	0.01	34	33	0.00924819	3568.27
Control	sample01	0.01	35	10	0.00793894	1259.61
Control	sample01	0.01	36	1	0.00560915	178.28
Control	sample01	0.01	37	55	0.00620902	8858.07
Control	sample01	0.01	38	29	0.00350835	8265.99
Control	sample01	0.01	39	25	0.00614003	4071.64
Control	sample01	0.01	40	28	0.00505101	5543.45
Control	sample01	0.01	41	12	0.00472224	2541.17
Control	sample01	0.01	42	14	0.0113967	1228.43
Control	sample01	0.01	43	20	0.00383942	5209.11
Control	sample01	0.01	44	0	0.00258816	0
Control	sample02	0.01	1	32199	11.3958	2825.51
Control	sample02	0.01	2	13289	2.56972	5171.38
Control	sample02	0.01	3	3900	1.5211	2563.93
Control	sample02	0.01	4	2317	0.320694	7224.95
Control	sample02	0.01	5	588	0.257057	2287.43
Control	sample02	0.01	6	944	0.413578	2282.52
Control	sample02	0.01	7	204	0.135024	1510.84
Control	sample02	0.01	8	317	0.0618824	5122.62
Control	sample02	0.01	9	23	0.0498108	461.748
Control	sample02	0.01	10	137	0.0465325	2944.18
Control	sample02	0.01	11	18	0.0709449	253.718
Control	sample02	0.01	12	349	0.0427015	8173.01
Control	sample02	0.01	13	171	0.0294592	5804.64
Control	sample02	0.01	14	65	0.0264024	2461.89
Control	sample02	0.01	15	179	0.0316648	5652.96
Control	sample02	0.01	16	8	0.0299252	267.333
Control	sample02	0.01	17	4	0.013849	288.829
Control	sample02	0.01	18	58	0.0140696	4122.37
Control	sample02	0.01	19	37	0.01734	2133.79
Control	sample02	0.01	20	0	0.002408	0
Control	sample02	0.01	21	10	0.019289	518.43
Control	sample02	0.01	22	55	0.0120701	4556.72
Control	sample02	0.01	23	74	0.00735059	10067.2
Control	sample02	0.01	24	46	0.0109085	4216.88
Control	sample02	0.01	25	12	0.0124513	963.753
Control	sample02	0.01	26	84	0.0116025	7239.82
Control	sample02	0.01	27	13	0.00932237	1394.5
Control	sample02	0.01	28	16	0.00657997	2431.62
Control	sample02	0.01	29	51	0.011041	4619.16
Control	sample02	0.01	30	57	0.0138914	4103.26
Control	sample02	0.01	31	63	0.00668698	9421.3
Control	sample02	0.01	32	99	0.00856243	11562.1
Control	sample02	0.01	33	20	0.00694182	2881.09
Control	sample02	0.01	34	27	0.00570042	4736.5
Control	sample02	0.01	35	48	0.00472986	10148.3
Control	sample02	0.01	36	1	0.00546099	183.117
Control	sample02	0.01	37	52	0.00556915	9337.15
Control	sample02	0.01	38	8	0.00305158	2621.59
Control	sample02	0.01	39	13	0.00354016	3672.15
Control	sample02	0.01	40	20	0.00412979	4842.86
Control	sample02	0.01	41	17	0.00446022	3811.47
Control	sample02	0.01	42	54	0.01211	4459.12
Control	sample02	0.01	43	5	0.00306003	1633.97
Control	sample02	0.01	44	0	0.00200922	0
Control	sample05	0.01	1	50487	11.2901	4471.8
Control	sample05	0.01	2	15919	2.51925	6318.95
Control	sample05	0.01	3	8973	1.84876	4853.52
Control	sample05	0.01	4	2627	0.243065	10807.8
Control	sample05	0.01	5	1064	0.244977	4343.27
Control	sample05	0.01	6	3163	0.509708	6205.51
Control	sample05	0.01	7	575	0.143382	4010.28
Control	sample05	0.01	8	220	0.0573332	3837.22
Control	sample05	0.01	9	653	0.0975649	6692.98
Control	sample05	0.01	10	269	0.056719	4742.68
Control	sample05	0.01	11	420	0.13731	3058.77
Control	sample05	0.01	12	233	0.0536024	4346.82
Control	sample05	0.01	13	152	0.0279406	5440.11
Control	sample05	0.01	14	161	0.0322689	4989.33
Control	sample05	0.01	15	189	0.0246733	7660.09
Control	sample05	0.01	16	60	0.025929	2314.01
Control	sample05	0.01	17	60	0.0191402	3134.76
Control	sample05	0.01	18	46	0.00984461	4672.61
Control	sample05	0.01	19	68	0.026245	2590.97
Control	sample05	0.01	20	69906	14.6329	4777.32
Control	sample05	0.01	21	69	0.0170836	4038.97
Control	sample05	0.01	22	130	0.01119	11617.6
Control	sample05	0.01	23	0	0.0166363	0
Control	sample05	0.01	24	64	0.0142424	4493.63
Control	sample05	0.01	25	37	0.0134888	2743.01
Control	sample05	0.01	26	95	0.00880058	10794.7
Control	sample05	0.01	27	48	0.00740774	6479.71
Control	sample05	0.01	28	50	0.00798099	6264.89
Control	sample05	0.01	29	69	0.0118182	5838.46
Control	sample05	0.01	30	66	0.00909421	7257.37
Control	sample05	0.01	31	185	0.0053312	34701.4
Control	sample05	0.01	32	72	0.00947014	7602.84
Control	sample05	0.01	33	26	0.0063296	4107.68
Control	sample05	0.01	34	27	0.00490042	5509.74
Control	sample05	0.01	35	70	0.00681139	10276.9
Control	sample05	0.01	36	11	0.00549018	2003.58
Control	sample05	0.01	37	73	0.00475802	15342.5
Control	sample05	0.01	38	21	0.00451078	4655.51
Control	sample05	0.01	39	56	0.00544858	10277.9
Control	sample05	0.01	40	45	0.00471405	9545.94
Control	sample05	0.01	41	8	0.0036608	2185.31
Control	sample05	0.01	42	39888	7.01796	5683.7
Control	sample05	0.01	43	61	0.00462906	13177.6
Control	sample05	0.01	44	8	0.0038704	2066.97
Control	sample06	0.01	1	55416	11.3691	4874.26
Control	sample06	0.01	2	13524	2.38041	5681.37
Control	sample06	0.01	3	7142	1.61242	4429.37
Control	sample06	0.01	4	3970	0.336785	11787.9
Control	sample06	0.01	5	813	0.286737	2835.35
Control	sample06	0.01	6	1149	0.305585	3760
Control	sample06	0.01	7	610	0.123775	4928.3
Control	sample06	0.01	8	492	0.0665983	7387.57
Control	sample06	0.01	9	103	0.0426266	2416.33
Control	sample06	0.01	10	571	0.0550832	10366.1
Control	sample06	0.01	11	101	0.0844634	1195.78
Control	sample06	0.01	12	163	0.0459485	3547.45
Control	sample06	0.01	13	94	0.0308894	3043.11
Control	sample06	0.01	14	129	0.0271437	4752.48
Control	sample06	0.01	15	192	0.0315656	6082.56
Control	sample06	0.01	16	62	0.033401	1856.23
Control	sample06	0.01	17	12	0.0149069	804.994
Control	sample06	0.01	18	191	0.015626	12223.2
Control	sample06	0.01	19	28	0.0151424	1849.11
Control	sample06	0.01	20	19	0.0059424	3197.36
Control	sample06	0.01	21	133	0.018333	7254.68
Control	sample06	0.01	22	103	0.0124132	8297.63
Control	sample06	0.01	23	66	0.00716736	9208.41
Control	sample06	0.01	24	61	0.014715	4145.43
Control	sample06	0.01	25	17	0.0119994	1416.74
Control	sample06	0.01	26	114	0.00949779	12002.8
Control	sample06	0.01	27	55	0.00985958	5578.33
Control	sample06	0.01	28	19	0.00778061	2441.97
Control	sample06	0.01	29	77	0.0125334	6143.6
Control	sample06	0.01	30	115	0.00787258	14607.7
Control	sample06	0.01	31	366	0.0156774	23345.6
Control	sample06	0.01	32	80	0.0104004	7692.02
Control	sample06	0.01	33	54	0.00841882	6414.2
Control	sample06	0.01	34	97	0.00910835	10649.6
Control	sample06	0.01	35	51	0.00445203	11455.4
Control	sample06	0.01	36	11	0.00699859	1571.74
Control	sample06	0.01	37	48	0.00553005	8679.85
Control	sample06	0.01	38	12	0.0037888	3167.23
Control	sample06	0.01	39	36	0.00560141	6426.96
Control	sample06	0.01	40	16	0.00504019	3174.48
Control	sample06	0.01	41	47	0.00435021	10804.1
Control	sample06	0.01	42	266	0.0216372	12293.6
Control	sample06	0.01	43	37	0.0047696	7757.46
Control	sample06	0.01	44	9	0.00347021	2593.5
Control	sample08	0.01	1	46116	11.6396	3962.01
Control	sample08	0.01	2	13234	2.3731	5576.68
Control	sample08	0.01	3	5928	1.64082	3612.82
Control	sample08	0.01	4	2651	0.332959	7961.94
Control	sample08	0.01	5	790	0.275506	2867.46
Control	sample08	0.01	6	1540	0.288401	5339.79
Control	sample08	0.01	7	311	0.13378	2324.71
Control	sample08	0.01	8	343	0.0636892	5385.53
Control	sample08	0.01	9	162	0.0593227	2730.83
Control	sample08	0.01	10	309	0.0563057	5487.9
Control	sample08	0.01	11	163	0.0921169	1769.49
Control	sample08	0.01	12	150	0.0455116	3295.86
Control	sample08	0.01	13	94	0.0317934	2956.59
Control	sample08	0.01	14	98	0.0276074	3549.77
Control	sample08	0.01	15	141	0.0280012	5035.5
Control	sample08	0.01	16	32	0.028191	1135.12
Control	sample08	0.01	17	19	0.0160803	1181.57
Control	sample08	0.01	18	138	0.0164412	8393.54
Control	sample08	0.01	19	67	0.0183506	3651.11
Control	sample08	0.01	20	34296	7.43713	4611.46
Control	sample08	0.01	21	53	0.0164744	3217.11
Control	sample08	0.01	22	57	0.0102846	5542.26
Control	sample08	0.01	23	55	0.00690426	7966.1
Control	sample08	0.01	24	38	0.0129286	2939.21
Control	sample08	0.01	25	3	0.0129446	231.756
Control	sample08	0.01	26	81	0.0118602	6829.55
Control	sample08	0.01	27	16	0.00771142	2074.84
Control	sample08	0.01	28	23	0.00692941	3319.19
Control	sample08	0.01	29	45	0.010379	4335.67
Control	sample08	0.01	30	64	0.0122874	5208.6
Control	sample08	0.01	31	116	0.0116114	9990.19
Control	sample08	0.01	32	38	0.00927898	4095.28
Control	sample08	0.01	33	36	0.00687936	5233.04
Control	sample08	0.01	34	50	0.0075552	6617.96
Control	sample08	0.01	35	35	0.00511898	6837.3
Control	sample08	0.01	36	13	0.00655258	1983.95
Control	sample08	0.01	37	51	0.00550342	9266.96
Control	sample08	0.01	38	19	0.0031504	6030.98
Control	sample08	0.01	39	13	0.00325958	3988.24
Control	sample08	0.01	40	14	0.00419059	3340.82
Control	sample08	0.01	41	29	0.00432122	6711.07
Control	sample08	0.01	42	229	0.0141692	16161.9
Control	sample08	0.01	43	12	0.00418144	2869.82
Control	sample08	0.01	44	4	0.00335878	1190.91
Control	sample09	0.01	1	54630	11.2181	4869.81
Control	sample09	0.01	2	10802	2.40712	4487.52
Control	sample09	0.01	3	5532	1.72209	3212.38
Control	sample09	0.01	4	3913	0.308682	12676.5
Control	sample09	0.01	5	691	0.276078	2502.92
Control	sample09	0.01	6	1095	0.316456	3460.2
Control	sample09	0.01	7	304	0.130274	2333.54
Control	sample09	0.01	8	636	0.0571579	11127.1
Control	sample09	0.01	9	223	0.0658592	3386.01
Control	sample09	0.01	10	203	0.0533476	3805.23
Control	sample09	0.01	11	114	0.111909	1018.69
Control	sample09	0.01	12	108	0.0414744	2604.02
Control	sample09	0.01	13	130	0.0355388	3657.98
Control	sample09	0.01	14	89	0.0258246	3446.32
Control	sample09	0.01	15	142	0.0266394	5330.45
Control	sample09	0.01	16	27	0.0313539	861.138
Control	sample09	0.01	17	2	0.013294	150.444
Control	sample09	0.01	18	107	0.0164784	6493.35
Control	sample09	0.01	19	114	0.0151123	7543.51
Control	sample09	0.01	20	9	0.00392582	2292.51
Control	sample09	0.01	21	14	0.0201743	693.953
Control	sample09	0.01	22	100	0.0133665	7481.37
Control	sample09	0.01	23	86	0.00705914	12182.8
Control	sample09	0.01	24	19	0.012569	1511.66
Control	sample09	0.01	25	77	0.0165103	4663.75
Control	sample09	0.01	26	145	0.0104376	13892
Control	sample09	0.01	27	42	0.0105016	3999.38
Control	sample09	0.01	28	19	0.00612979	3099.62
Control	sample09	0.01	29	79	0.0108296	7294.84
Control	sample09	0.01	30	117	0.00949018	12328.5
Control	sample09	0.01	31	153	0.00793306	19286.4
Control	sample09	0.01	32	66	0.00868141	7602.45
Control	sample09	0.01	33	24	0.00657082	3652.51
Control	sample09	0.01	34	93	0.00818163	11366.9
Control	sample09	0.01	35	3	0.00779386	384.919
Control	sample09	0.01	36	7	0.00588019	1190.44
Control	sample09	0.01	37	101	0.00613907	16452
Control	sample09	0.01	38	16	0.0032288	4955.4
Control	sample09	0.01	39	37	0.00312141	11853.6
Control	sample09	0.01	40	21	0.00504979	4158.59
Control	sample09	0.01	41	6	0.00354918	1690.53
Control	sample09	0.01	42	110	0.0155653	7067
Control	sample09	0.01	43	5	0.00311898	1603.09
Control	sample09	0.01	44	2	0.00330957	604.308
Control	sample10	0.01	1	64543	11.9343	5408.18
Control	sample10	0.01	2	17905	2.28797	7825.72
Control	sample10	0.01	3	10443	1.78981	5834.71
Control	sample10	0.01	4	3732	0.349073	10691.2
Control	sample10	0.01	5	806	0.266334	3026.28
Control	sample10	0.01	6	3459	0.53995	6406.15
Control	sample10	0.01	7	603	0.125355	4810.35
Control	sample10	0.01	8	590	0.0725889	8127.97
Control	sample10	0.01	9	67	0.0408685	1639.4
Control	sample10	0.01	10	251	0.056285	4459.45
Control	sample10	0.01	11	120	0.0773771	1550.85
Control	sample10	0.01	12	255	0.0418012	6100.31
Control	sample10	0.01	13	291	0.0301215	9660.88
Control	sample10	0.01	14	135	0.0246918	5467.39
Control	sample10	0.01	15	293	0.0262452	11163.9
Control	sample10	0.01	16	84	0.0320459	2621.24
Control	sample10	0.01	17	14	0.0146984	952.487
Control	sample10	0.01	18	116	0.018012	6440.14
Control	sample10	0.01	19	77	0.0173622	4434.93
Control	sample10	0.01	20	84087	14.9384	5628.91
Control	sample10	0.01	21	112	0.0219644	5099.16
Control	sample10	0.01	22	79	0.0130787	6040.38
Control	sample10	0.01	23	49	0.00440941	11112.6
Control	sample10	0.01	24	154	0.0127832	12047.1
Control	sample10	0.01	25	30	0.0123645	2426.31
Control	sample10	0.01	26	140	0.0116824	11983.8
Control	sample10	0.01	27	48	0.00908102	5285.75
Control	sample10	0.01	28	36	0.00660422	5451.06
Control	sample10	0.01	29	86	0.0113347	7587.35
Control	sample10	0.01	30	69	0.0113598	6074.05
Control	sample10	0.01	31	176	0.00673325	26138.9
Control	sample10	0.01	32	116	0.00913242	12702
Control	sample10	0.01	33	59	0.00767142	7690.88
Control	sample10	0.01	34	36	0.00690957	5210.17
Control	sample10	0.01	35	85	0.00465146	18273.8
Control	sample10	0.01	36	20	0.00624979	3200.11
Control	sample10	0.01	37	59	0.00472979	12474.1
Control	sample10	0.01	38	23	0.00376058	6116.08
Control	sample10	0.01	39	28	0.00551021	5081.48
Control	sample10	0.01	40	10	0.003872	2582.64
Control	sample10	0.01	41	23	0.00415821	5531.23
Control	sample10	0.01	42	76	0.0108121	7029.16
Control	sample10	0.01	43	37	0.00316819	11678.6
Control	sample10	0.01	44	0	0.00185018	0
Isoflurane	sample11	0.01	1	89709	9.91214	9050.41
Isoflurane	sample11	0.01	2	18460	1.96928	9373.97
Isoflurane	sample11	0.01	3	12495	1.67641	7453.44
Isoflurane	sample11	0.01	4	6384	0.285766	22340
Isoflurane	sample11	0.01	5	2501	0.238897	10468.9
Isoflurane	sample11	0.01	6	3734	0.317939	11744.4
Isoflurane	sample11	0.01	7	440	0.112413	3914.14
Isoflurane	sample11	0.01	8	979	0.0553169	17698
Isoflurane	sample11	0.01	9	252	0.0630251	3998.41
Isoflurane	sample11	0.01	10	333	0.0503028	6619.9
Isoflurane	sample11	0.01	11	805	0.0976233	8245.98
Isoflurane	sample11	0.01	12	417	0.0409635	10179.8
Isoflurane	sample11	0.01	13	350	0.0286828	12202.5
Isoflurane	sample11	0.01	14	110	0.0222916	4934.6
Isoflurane	sample11	0.01	15	224	0.0259848	8620.41
Isoflurane	sample11	0.01	16	29	0.0264022	1098.39
Isoflurane	sample11	0.01	17	24	0.0158182	1517.24
Isoflurane	sample11	0.01	18	305	0.0144396	21122.4
Isoflurane	sample11	0.01	19	61	0.0143842	4240.77
Isoflurane	sample11	0.01	20	41	0.0189895	2159.09
Isoflurane	sample11	0.01	21	62	0.0151217	4100.06
Isoflurane	sample11	0.01	22	66	0.0107882	6117.78
Isoflurane	sample11	0.01	23	125	0.0068496	18249.2
Isoflurane	sample11	0.01	24	144	0.0116026	12411
Isoflurane	sample11	0.01	25	13	0.010773	1206.72
Isoflurane	sample11	0.01	26	218	0.01026	21247.6
Isoflurane	sample11	0.01	27	53	0.0101916	5200.35
Isoflurane	sample11	0.01	28	34	0.00665901	5105.87
Isoflurane	sample11	0.01	29	129	0.01026	12573.1
Isoflurane	sample11	0.01	30	103	0.00862259	11945.4
Isoflurane	sample11	0.01	31	419	0.0075104	55789.3
Isoflurane	sample11	0.01	32	105	0.00843878	12442.6
Isoflurane	sample11	0.01	33	38	0.00775226	4901.8
Isoflurane	sample11	0.01	34	49	0.00666246	7354.64
Isoflurane	sample11	0.01	35	42	0.00690304	6084.28
Isoflurane	sample11	0.01	36	12	0.00602918	1990.32
Isoflurane	sample11	0.01	37	92	0.00402099	22879.9
Isoflurane	sample11	0.01	38	51	0.00284122	17950.1
Isoflurane	sample11	0.01	39	36	0.00596941	6030.75
Isoflurane	sample11	0.01	40	86	0.00417062	20620.4
Isoflurane	sample11	0.01	41	38	0.00380877	9976.98
Isoflurane	sample11	0.01	42	163	0.0127506	12783.7
Isoflurane	sample11	0.01	43	87	0.00355078	24501.6
Isoflurane	sample11	0.01	44	7	0.00418816	1671.38
Isoflurane	sample12	0.01	1	89424	10.1284	8829.04
Isoflurane	sample12	0.01	2	21794	2.57169	8474.59
Isoflurane	sample12	0.01	3	9312	1.84822	5038.35
Isoflurane	sample12	0.01	4	7833	0.292066	26819.3
Isoflurane	sample12	0.01	5	3314	0.235269	14086
Isoflurane	sample12	0.01	6	3713	0.374645	9910.73
Isoflurane	sample12	0.01	7	588	0.106984	5496.13
Isoflurane	sample12	0.01	8	1221	0.0580625	21029.1
Isoflurane	sample12	0.01	9	174	0.0734983	2367.4
Isoflurane	sample12	0.01	10	750	0.0604356	12409.9
Isoflurane	sample12	0.01	11	193	0.0782817	2465.46
Isoflurane	sample12	0.01	12	760	0.0363734	20894.4
Isoflurane	sample12	0.01	13	244	0.0288927	8445.05
Isoflurane	sample12	0.01	14	132	0.0238225	5540.99
Isoflurane	sample12	0.01	15	419	0.0294452	14229.8
Isoflurane	sample12	0.01	16	3	0.0304554	98.5046
Isoflurane	sample12	0.01	17	5	0.0158724	315.011
Isoflurane	sample12	0.01	18	415	0.0158322	26212.4
Isoflurane	sample12	0.01	19	51	0.013849	3682.57
Isoflurane	sample12	0.01	20	15	0.00905299	1656.91
Isoflurane	sample12	0.01	21	83	0.0163907	5063.86
Isoflurane	sample12	0.01	22	189	0.0122132	15475
Isoflurane	sample12	0.01	23	46	0.00501856	9165.98
Isoflurane	sample12	0.01	24	168	0.00968922	17338.9
Isoflurane	sample12	0.01	25	34	0.0130197	2611.42
Isoflurane	sample12	0.01	26	296	0.00828979	35706.6
Isoflurane	sample12	0.01	27	123	0.0120718	10189
Isoflurane	sample12	0.01	28	34	0.00486118	6994.18
Isoflurane	sample12	0.01	29	83	0.00960896	8637.77
Isoflurane	sample12	0.01	30	177	0.0113312	15620.6
Isoflurane	sample12	0.01	31	391	0.00785261	49792.4
Isoflurane	sample12	0.01	32	205	0.00820141	24995.7
Isoflurane	sample12	0.01	33	56	0.00716736	7813.2
Isoflurane	sample12	0.01	34	105	0.00398918	26321.2
Isoflurane	sample12	0.01	35	41	0.00546099	7507.79
Isoflurane	sample12	0.01	36	1	0.00625958	159.755
Isoflurane	sample12	0.01	37	119	0.00547181	21747.8
Isoflurane	sample12	0.01	38	78	0.00254906	30599.6
Isoflurane	sample12	0.01	39	65	0.00621139	10464.6
Isoflurane	sample12	0.01	40	22	0.00413056	5326.15
Isoflurane	sample12	0.01	41	31	0.00278042	11149.4
Isoflurane	sample12	0.01	42	77	0.0118532	6496.14
Isoflurane	sample12	0.01	43	38	0.00329875	11519.5
Isoflurane	sample12	0.01	44	1	0.00192013	520.799
Isoflurane	sample13	0.01	1	159817	11.3568	14072.3
Isoflurane	sample13	0.01	2	24083	2.52251	9547.25
Isoflurane	sample13	0.01	3	10516	1.44358	7284.69
Isoflurane	sample13	0.01	4	12141	0.317583	38229.4
Isoflurane	sample13	0.01	5	3703	0.262881	14086.2
Isoflurane	sample13	0.01	6	2935	0.266122	11028.8
Isoflurane	sample13	0.01	7	828	0.121516	6813.9
Isoflurane	sample13	0.01	8	1481	0.0453732	32640.4
Isoflurane	sample13	0.01	9	172	0.0289489	5941.51
Isoflurane	sample13	0.01	10	633	0.0599604	10557
Isoflurane	sample13	0.01	11	395	0.064869	6089.2
Isoflurane	sample13	0.01	12	668	0.038436	17379.5
Isoflurane	sample13	0.01	13	622	0.0367693	16916.3
Isoflurane	sample13	0.01	14	265	0.0287842	9206.44
Isoflurane	sample13	0.01	15	276	0.0270919	10187.5
Isoflurane	sample13	0.01	16	47	0.0299648	1568.51
Isoflurane	sample13	0.01	17	23	0.0140129	1641.35
Isoflurane	sample13	0.01	18	392	0.0169856	23078.4
Isoflurane	sample13	0.01	19	143	0.0170618	8381.28
Isoflurane	sample13	0.01	20	184529	13.9128	13263.2
Isoflurane	sample13	0.01	21	131	0.0171534	7636.97
Isoflurane	sample13	0.01	22	261	0.0100409	25993.7
Isoflurane	sample13	0.01	23	75	0.00725882	10332.3
Isoflurane	sample13	0.01	24	147	0.0102796	14300.1
Isoflurane	sample13	0.01	25	33	0.0124708	2646.18
Isoflurane	sample13	0.01	26	325	0.00866976	37486.6
Isoflurane	sample13	0.01	27	92	0.00883283	10415.7
Isoflurane	sample13	0.01	28	63	0.00716986	8786.79
Isoflurane	sample13	0.01	29	87	0.0107673	8080.02
Isoflurane	sample13	0.01	30	152	0.00970144	15667.8
Isoflurane	sample13	0.01	31	197	0.00800922	24596.7
Isoflurane	sample13	0.01	32	146	0.00866899	16841.6
Isoflurane	sample13	0.01	33	106	0.008848	11980.1
Isoflurane	sample13	0.01	34	168	0.00634061	26495.9
Isoflurane	sample13	0.01	35	55	0.00636941	8635.03
Isoflurane	sample13	0.01	36	13	0.00700096	1856.89
Isoflurane	sample13	0.01	37	206	0.00568717	36221.9
Isoflurane	sample13	0.01	38	64	0.0035792	17881.1
Isoflurane	sample13	0.01	39	49	0.00598182	8191.48
Isoflurane	sample13	0.01	40	80	0.00481882	16601.6
Isoflurane	sample13	0.01	41	74	0.00338938	21832.9
Isoflurane	sample13	0.01	42	7	0.000646016	10835.6
Isoflurane	sample13	0.01	43	105	0.00475219	22095.1
Isoflurane	sample13	0.01	44	53	0.00298765	17739.7
Isoflurane	sample14	0.01	1	185354	11.2665	16451.7
Isoflurane	sample14	0.01	2	27527	2.19048	12566.7
Isoflurane	sample14	0.01	3	16435	1.69589	9691.06
Isoflurane	sample14	0.01	4	13233	0.316513	41808.7
Isoflurane	sample14	0.01	5	3545	0.278369	12734.9
Isoflurane	sample14	0.01	6	6527	0.46907	13914.8
Isoflurane	sample14	0.01	7	1506	0.118007	12762
Isoflurane	sample14	0.01	8	1737	0.0559338	31054.6
Isoflurane	sample14	0.01	9	187	0.0679748	2751.02
Isoflurane	sample14	0.01	10	1177	0.0708108	16621.8
Isoflurane	sample14	0.01	11	804	0.108759	7392.46
Isoflurane	sample14	0.01	12	1184	0.0565491	20937.6
Isoflurane	sample14	0.01	13	556	0.0303582	18314.7
Isoflurane	sample14	0.01	14	563	0.0388532	14490.4
Isoflurane	sample14	0.01	15	350	0.0223722	15644.4
Isoflurane	sample14	0.01	16	29	0.0341612	848.918
Isoflurane	sample14	0.01	17	34	0.0166278	2044.77
Isoflurane	sample14	0.01	18	407	0.0146	27876.7
Isoflurane	sample14	0.01	19	103	0.0180269	5713.67
Isoflurane	sample14	0.01	20	4	0.00248211	1611.53
Isoflurane	sample14	0.01	21	351	0.0177218	19806.1
Isoflurane	sample14	0.01	22	181	0.0122514	14773.8
Isoflurane	sample14	0.01	23	96	0.00554995	17297.4
Isoflurane	sample14	0.01	24	419	0.0110017	38084.9
Isoflurane	sample14	0.01	25	25	0.0102114	2448.25
Isoflurane	sample14	0.01	26	181	0.00910176	19886.3
Isoflurane	sample14	0.01	27	95	0.0123786	7674.52
Isoflurane	sample14	0.01	28	99	0.00720064	13748.8
Isoflurane	sample14	0.01	29	180	0.0116508	15449.6
Isoflurane	sample14	0.01	30	190	0.00951142	19976
Isoflurane	sample14	0.01	31	483	0.00778483	62043.7
Isoflurane	sample14	0.01	32	251	0.0101816	24652.4
Isoflurane	sample14	0.01	33	125	0.0076384	16364.7
Isoflurane	sample14	0.01	34	175	0.00662003	26434.9
Isoflurane	sample14	0.01	35	93	0.00603085	15420.7
Isoflurane	sample14	0.01	36	8	0.0081008	987.557
Isoflurane	sample14	0.01	37	152	0.00621978	24438.2
Isoflurane	sample14	0.01	38	71	0.0034992	20290.4
Isoflurane	sample14	0.01	39	41	0.00342099	11984.8
Isoflurane	sample14	0.01	40	55	0.00385856	14254
Isoflurane	sample14	0.01	41	72	0.00433037	16626.8
Isoflurane	sample14	0.01	42	257	0.0202538	12689
Isoflurane	sample14	0.01	43	76	0.00361082	21047.9
Isoflurane	sample14	0.01	44	2	0.00148922	1342.99
Isoflurane	sample16	0.01	1	108878	10.9394	9952.79
Isoflurane	sample16	0.01	2	21088	2.15601	9781.03
Isoflurane	sample16	0.01	3	17078	1.66566	10253
Isoflurane	sample16	0.01	4	8336	0.315948	26384.1
Isoflurane	sample16	0.01	5	2385	0.259322	9197.06
Isoflurane	sample16	0.01	6	5420	0.339883	15946.7
Isoflurane	sample16	0.01	7	505	0.11409	4426.33
Isoflurane	sample16	0.01	8	1560	0.0704746	22135.6
Isoflurane	sample16	0.01	9	664	0.0605284	10970
Isoflurane	sample16	0.01	10	587	0.0606908	9671.98
Isoflurane	sample16	0.01	11	859	0.109264	7861.66
Isoflurane	sample16	0.01	12	566	0.0416728	13582
Isoflurane	sample16	0.01	13	439	0.0336492	13046.4
Isoflurane	sample16	0.01	14	156	0.0263991	5909.29
Isoflurane	sample16	0.01	15	336	0.0239473	14030.8
Isoflurane	sample16	0.01	16	58	0.0263134	2204.2
Isoflurane	sample16	0.01	17	24	0.0181752	1320.48
Isoflurane	sample16	0.01	18	259	0.0151668	17076.7
Isoflurane	sample16	0.01	19	40	0.0159249	2511.8
Isoflurane	sample16	0.01	20	17	0.0124729	1362.96
Isoflurane	sample16	0.01	21	114	0.0146294	7792.51
Isoflurane	sample16	0.01	22	42	0.0141343	2971.5
Isoflurane	sample16	0.01	23	124	0.00677197	18310.8
Isoflurane	sample16	0.01	24	77	0.0130876	5883.42
Isoflurane	sample16	0.01	25	25	0.0115986	2155.43
Isoflurane	sample16	0.01	26	125	0.00869376	14378.1
Isoflurane	sample16	0.01	27	40	0.0077008	5194.27
Isoflurane	sample16	0.01	28	34	0.00622221	5464.3
Isoflurane	sample16	0.01	29	86	0.013018	6606.25
Isoflurane	sample16	0.01	30	92	0.0119246	7715.14
Isoflurane	sample16	0.01	31	572	0.0113688	50313
Isoflurane	sample16	0.01	32	90	0.00851021	10575.5
Isoflurane	sample16	0.01	33	51	0.00688301	7409.55
Isoflurane	sample16	0.01	34	27	0.00826982	3264.88
Isoflurane	sample16	0.01	35	59	0.00651264	9059.31
Isoflurane	sample16	0.01	36	19	0.00585779	3243.54
Isoflurane	sample16	0.01	37	118	0.00523981	22519.9
Isoflurane	sample16	0.01	38	73	0.00349843	20866.5
Isoflurane	sample16	0.01	39	33	0.00371878	8873.87
Isoflurane	sample16	0.01	40	106	0.00452	23451.3
Isoflurane	sample16	0.01	41	39	0.00499264	7811.5
Isoflurane	sample16	0.01	42	569	0.0208942	27232.4
Isoflurane	sample16	0.01	43	94	0.00342938	27410.2
Isoflurane	sample16	0.01	44	5	0.00303917	1645.19
Isoflurane	sample17	0.01	1	121564	9.9676	12195.9
Isoflurane	sample17	0.01	2	28098	2.01078	13973.7
Isoflurane	sample17	0.01	3	21787	1.52701	14267.7
Isoflurane	sample17	0.01	4	8260	0.280822	29413.6
Isoflurane	sample17	0.01	5	3026	0.247251	12238.6
Isoflurane	sample17	0.01	6	8616	0.419964	20516.1
Isoflurane	sample17	0.01	7	663	0.115099	5760.26
Isoflurane	sample17	0.01	8	1413	0.0628864	22469.1
Isoflurane	sample17	0.01	9	550	0.0528056	10415.6
Isoflurane	sample17	0.01	10	778	0.0526504	14776.7
Isoflurane	sample17	0.01	11	775	0.0710214	10912.2
Isoflurane	sample17	0.01	12	608	0.0497226	12227.8
Isoflurane	sample17	0.01	13	533	0.03052	17464
Isoflurane	sample17	0.01	14	204	0.0280842	7263.86
Isoflurane	sample17	0.01	15	374	0.0248841	15029.7
Isoflurane	sample17	0.01	16	38	0.027851	1364.4
Isoflurane	sample17	0.01	17	28	0.0173409	1614.68
Isoflurane	sample17	0.01	18	260	0.012972	20043.1
Isoflurane	sample17	0.01	19	108	0.0147142	7339.83
Isoflurane	sample17	0.01	20	59	0.023065	2557.99
Isoflurane	sample17	0.01	21	79	0.0152045	5195.84
Isoflurane	sample17	0.01	22	120	0.0108614	11048.3
Isoflurane	sample17	0.01	23	169	0.00661235	25558.2
Isoflurane	sample17	0.01	24	75	0.0131726	5693.63
Isoflurane	sample17	0.01	25	33	0.0111517	2959.18
Isoflurane	sample17	0.01	26	319	0.0106518	29948.1
Isoflurane	sample17	0.01	27	81	0.00983059	8239.59
Isoflurane	sample17	0.01	28	62	0.00642182	9654.58
Isoflurane	sample17	0.01	29	85	0.0124404	6832.59
Isoflurane	sample17	0.01	30	58	0.00567059	10228.2
Isoflurane	sample17	0.01	31	818	0.0119628	68378.5
Isoflurane	sample17	0.01	32	98	0.00917082	10686.1
Isoflurane	sample17	0.01	33	49	0.006448	7599.26
Isoflurane	sample17	0.01	34	35	0.00421958	8294.66
Isoflurane	sample17	0.01	35	153	0.00587878	26025.8
Isoflurane	sample17	0.01	36	4	0.00557178	717.904
Isoflurane	sample17	0.01	37	109	0.00636218	17132.5
Isoflurane	sample17	0.01	38	51	0.00300838	16952.6
Isoflurane	sample17	0.01	39	76	0.00461997	16450.3
Isoflurane	sample17	0.01	40	48	0.00404	11881.2
Isoflurane	sample17	0.01	41	37	0.00428301	8638.79
Isoflurane	sample17	0.01	42	539	0.0154082	34981.4
Isoflurane	sample17	0.01	43	78	0.00307002	25407
Isoflurane	sample17	0.01	44	21	0.00241101	8710.05
Isoflurane	sample18	0.01	1	69832	10.067	6936.71
Isoflurane	sample18	0.01	2	15628	2.01074	7772.26
Isoflurane	sample18	0.01	3	6427	1.55571	4131.22
Isoflurane	sample18	0.01	4	4562	0.291306	15660.5
Isoflurane	sample18	0.01	5	2742	0.248251	11045.3
Isoflurane	sample18	0.01	6	3087	0.405832	7606.6
Isoflurane	sample18	0.01	7	345	0.108421	3182.05
Isoflurane	sample18	0.01	8	429	0.0640593	6696.92
Isoflurane	sample18	0.01	9	130	0.0473386	2746.18
Isoflurane	sample18	0.01	10	465	0.0541711	8583.92
Isoflurane	sample18	0.01	11	10	0.0794337	125.891
Isoflurane	sample18	0.01	12	614	0.043653	14065.5
Isoflurane	sample18	0.01	13	206	0.0256916	8018.17
Isoflurane	sample18	0.01	14	150	0.0263014	5703.12
Isoflurane	sample18	0.01	15	351	0.025261	13894.9
Isoflurane	sample18	0.01	16	23	0.0235562	976.387
Isoflurane	sample18	0.01	17	19	0.0155006	1225.76
Isoflurane	sample18	0.01	18	137	0.0136824	10012.8
Isoflurane	sample18	0.01	19	70	0.014732	4751.57
Isoflurane	sample18	0.01	20	7	0.0043929	1593.48
Isoflurane	sample18	0.01	21	27	0.0161392	1672.95
Isoflurane	sample18	0.01	22	116	0.010332	11227.3
Isoflurane	sample18	0.01	23	55	0.00666982	8246.09
Isoflurane	sample18	0.01	24	77	0.0110188	6988.09
Isoflurane	sample18	0.01	25	4	0.0120736	331.301
Isoflurane	sample18	0.01	26	214	0.00868006	24654.2
Isoflurane	sample18	0.01	27	44	0.0074	5945.95
Isoflurane	sample18	0.01	28	34	0.00686118	4955.41
Isoflurane	sample18	0.01	29	75	0.010511	7135.4
Isoflurane	sample18	0.01	30	83	0.0082496	10061.1
Isoflurane	sample18	0.01	31	107	0.00519917	20580.2
Isoflurane	sample18	0.01	32	94	0.00840218	11187.6
Isoflurane	sample18	0.01	33	49	0.00651437	7521.83
Isoflurane	sample18	0.01	34	81	0.005288	15317.7
Isoflurane	sample18	0.01	35	50	0.00554157	9022.72
Isoflurane	sample18	0.01	36	0	0.00445101	0
Isoflurane	sample18	0.01	37	83	0.00561242	14788.6
Isoflurane	sample18	0.01	38	21	0.00346163	6066.5
Isoflurane	sample18	0.01	39	31	0.00344941	8987.05
Isoflurane	sample18	0.01	40	33	0.00437197	7548.09
Isoflurane	sample18	0.01	41	27	0.00355078	7603.95
Isoflurane	sample18	0.01	42	49	0.00696422	7035.96
Isoflurane	sample18	0.01	43	116	0.00385939	30056.5
Isoflurane	sample18	0.01	44	0	0.00110899	0
Isoflurane	sample19	0.01	1	151805	11.01	13787.9
Isoflurane	sample19	0.01	2	25452	2.11806	12016.6
Isoflurane	sample19	0.01	3	16888	1.68895	9999.09
Isoflurane	sample19	0.01	4	11126	0.30843	36073
Isoflurane	sample19	0.01	5	2900	0.255512	11349.8
Isoflurane	sample19	0.01	6	6642	0.421845	15745.1
Isoflurane	sample19	0.01	7	1057	0.129303	8174.58
Isoflurane	sample19	0.01	8	1503	0.0694021	21656.4
Isoflurane	sample19	0.01	9	370	0.064601	5727.47
Isoflurane	sample19	0.01	10	747	0.0464768	16072.5
Isoflurane	sample19	0.01	11	877	0.115622	7585.09
Isoflurane	sample19	0.01	12	862	0.0516714	16682.3
Isoflurane	sample19	0.01	13	534	0.0332412	16064.4
Isoflurane	sample19	0.01	14	400	0.0301574	13263.8
Isoflurane	sample19	0.01	15	381	0.0276806	13764.2
Isoflurane	sample19	0.01	16	15	0.0259674	577.648
Isoflurane	sample19	0.01	17	14	0.015142	924.584
Isoflurane	sample19	0.01	18	336	0.0131811	25491.1
Isoflurane	sample19	0.01	19	73	0.0176244	4141.97
Isoflurane	sample19	0.01	20	8	0.00912909	876.32
Isoflurane	sample19	0.01	21	222	0.0174022	12757
Isoflurane	sample19	0.01	22	82	0.0122306	6704.5
Isoflurane	sample19	0.01	23	138	0.00748941	18426
Isoflurane	sample19	0.01	24	221	0.0148814	14850.7
Isoflurane	sample19	0.01	25	48	0.0128132	3746.12
Isoflurane	sample19	0.01	26	278	0.0113197	24558.9
Isoflurane	sample19	0.01	27	114	0.012289	9276.62
Isoflurane	sample19	0.01	28	111	0.0058896	18846.8
Isoflurane	sample19	0.01	29	144	0.00980326	14689
Isoflurane	sample19	0.01	30	158	0.00825043	19150.5
Isoflurane	sample19	0.01	31	265	0.00614918	43095.1
Isoflurane	sample19	0.01	32	188	0.00967322	19435.1
Isoflurane	sample19	0.01	33	71	0.0076208	9316.61
Isoflurane	sample19	0.01	34	71	0.00697018	10186.3
Isoflurane	sample19	0.01	35	71	0.00679066	10455.5
Isoflurane	sample19	0.01	36	10	0.00615994	1623.39
Isoflurane	sample19	0.01	37	132	0.00514822	25639.9
Isoflurane	sample19	0.01	38	85	0.00457344	18585.6
Isoflurane	sample19	0.01	39	52	0.00638957	8138.27
Isoflurane	sample19	0.01	40	58	0.00476979	12159.9
Isoflurane	sample19	0.01	41	58	0.00480301	12075.8
Isoflurane	sample19	0.01	42	452	0.0200682	22523.2
Isoflurane	sample19	0.01	43	74	0.00342099	21631.2
Isoflurane	sample19	0.01	44	1	0.00266061	375.854
Isoflurane	sample20	0.01	1	168964	10.4718	16135.1
Isoflurane	sample20	0.01	2	29476	2.06127	14299.9
Isoflurane	sample20	0.01	3	16443	1.49447	11002.6
Isoflurane	sample20	0.01	4	10686	0.297332	35939.7
Isoflurane	sample20	0.01	5	3664	0.250891	14603.9
Isoflurane	sample20	0.01	6	3929	0.295425	13299.5
Isoflurane	sample20	0.01	7	1356	0.113316	11966.5
Isoflurane	sample20	0.01	8	1518	0.06419	23648.5
Isoflurane	sample20	0.01	9	393	0.0311276	12625.5
Isoflurane	sample20	0.01	10	972	0.0606346	16030.4
Isoflurane	sample20	0.01	11	169	0.0615011	2747.92
Isoflurane	sample20	0.01	12	1107	0.0379206	29192.6
Isoflurane	sample20	0.01	13	572	0.0280734	20375.2
Isoflurane	sample20	0.01	14	428	0.0284244	15057.5
Isoflurane	sample20	0.01	15	545	0.0269224	20243.3
Isoflurane	sample20	0.01	16	30	0.0262752	1141.76
Isoflurane	sample20	0.01	17	20	0.017541	1140.19
Isoflurane	sample20	0.01	18	353	0.0157113	22467.9
Isoflurane	sample20	0.01	19	197	0.0172552	11416.8
Isoflurane	sample20	0.01	20	90980	6.62192	13739.2
Isoflurane	sample20	0.01	21	126	0.0169722	7423.92
Isoflurane	sample20	0.01	22	226	0.0134854	16758.8
Isoflurane	sample20	0.01	23	207	0.00594957	34792.4
Isoflurane	sample20	0.01	24	345	0.013111	26313.7
Isoflurane	sample20	0.01	25	61	0.015118	4034.94
Isoflurane	sample20	0.01	26	456	0.0111711	40819.7
Isoflurane	sample20	0.01	27	154	0.00914746	16835.3
Isoflurane	sample20	0.01	28	71	0.0067008	10595.7
Isoflurane	sample20	0.01	29	83	0.00999859	8301.17
Isoflurane	sample20	0.01	30	172	0.00640845	26839.6
Isoflurane	sample20	0.01	31	586	0.0133698	43830.2
Isoflurane	sample20	0.01	32	245	0.0078704	31129.3
Isoflurane	sample20	0.01	33	133	0.00765101	17383.3
Isoflurane	sample20	0.01	34	110	0.0076208	14434.2
Isoflurane	sample20	0.01	35	107	0.00571066	18736.9
Isoflurane	sample20	0.01	36	12	0.00523059	2294.2
Isoflurane	sample20	0.01	37	144	0.00511238	28166.9
Isoflurane	sample20	0.01	38	90	0.00308922	29133.6
Isoflurane	sample20	0.01	39	56	0.00278221	20127.9
Isoflurane	sample20	0.01	40	111	0.00504	22023.8
Isoflurane	sample20	0.01	41	92	0.00434042	21196.1
Isoflurane	sample20	0.01	42	152	0.0109953	13824.1
Isoflurane	sample20	0.01	43	52	0.0039536	13152.6
Isoflurane	sample20	0.01	44	15	0.0023504	6381.89
Control	sample01	0.05	1	128794	39.4167	3267.5
Control	sample01	0.05	2	79450	24.2995	3269.61
Control	sample01	0.05	3	2687	0.612679	4385.66
Control	sample01	0.05	4	2465	0.663115	3717.3
Control	sample01	0.05	5	345	0.294985	1169.55
Control	sample01	0.05	6	337	0.312635	1077.93
Control	sample01	0.05	7	1107	0.729262	1517.97
Control	sample01	0.05	8	82	0.0901908	909.184
Control	sample01	0.05	9	629	0.139248	4517.13
Control	sample01	0.05	10	170	0.127139	1337.12
Control	sample01	0.05	11	1137	0.0853821	13316.6
Control	sample01	0.05	12	938	0.0584374	16051.4
Control	sample01	0.05	13	68	0.0255467	2661.79
Control	sample01	0.05	14	68	0.0303528	2240.32
Control	sample01	0.05	15	119	0.0248336	4791.89
Control	sample01	0.05	16	12	0.0343937	348.901
Control	sample01	0.05	17	211	0.0281398	7498.28
Control	sample01	0.05	18	270	0.0218932	12332.6
Control	sample01	0.05	19	12	0.0260522	460.613
Control	sample01	0.05	20	14	0.0296672	471.902
Control	sample01	0.05	21	44	0.0181021	2430.65
Control	sample01	0.05	22	40	0.0295526	1353.52
Control	sample01	0.05	23	3	0.0467425	64.1814
Control	sample01	0.05	24	42	0.0246382	1704.67
Control	sample01	0.05	25	114	0.0205981	5534.5
Control	sample01	0.05	26	38	0.0189532	2004.94
Control	sample01	0.05	27	11	0.0210906	521.56
Control	sample01	0.05	28	34	0.0220358	1542.94
Control	sample01	0.05	29	53	0.0142834	3710.6
Control	sample01	0.05	30	258	0.0139924	18438.6
Control	sample01	0.05	31	20	0.01467	1363.33
Control	sample01	0.05	32	0	0.0104196	0
Control	sample01	0.05	33	42	0.0133903	3136.59
Control	sample01	0.05	34	38	0.0077024	4933.53
Control	sample01	0.05	35	14	0.0106984	1308.61
Control	sample01	0.05	36	3	0.00589882	508.577
Control	sample01	0.05	37	23	0.00736794	3121.63
Control	sample01	0.05	38	5	0.00685958	728.907
Control	sample01	0.05	39	8	0.00633894	1262.04
Control	sample01	0.05	40	70	0.0058912	11882.1
Control	sample01	0.05	41	8	0.00766093	1044.26
Control	sample01	0.05	42	9	0.00943443	953.953
Control	sample01	0.05	43	4	0.00506842	789.201
Control	sample01	0.05	44	31	0.00603917	5133.16
Control	sample01	0.05	45	5	0.0060384	828.034
Control	sample01	0.05	46	1	0.00367898	271.815
Control	sample01	0.05	47	0	0.00427629	0
Control	sample02	0.05	1	118208	38.8266	3044.51
Control	sample02	0.05	2	75052	20.3655	3685.25
Control	sample02	0.05	3	2159	0.523937	4120.72
Control	sample02	0.05	4	6371	0.709206	8983.28
Control	sample02	0.05	5	322	0.238066	1352.57
Control	sample02	0.05	6	1007	0.334078	3014.27
Control	sample02	0.05	7	1814	0.621638	2918.1
Control	sample02	0.05	8	81	0.0867512	933.704
Control	sample02	0.05	9	768	0.129545	5928.46
Control	sample02	0.05	10	115	0.107903	1065.77
Control	sample02	0.05	11	556	0.064617	8604.55
Control	sample02	0.05	12	336	0.0437424	7681.33
Control	sample02	0.05	13	3	0.0395398	75.873
Control	sample02	0.05	14	20	0.0293342	681.798
Control	sample02	0.05	15	137	0.0272626	5025.2
Control	sample02	0.05	16	77	0.027414	2808.78
Control	sample02	0.05	17	388	0.0274047	14158.2
Control	sample02	0.05	18	495	0.0228532	21660
Control	sample02	0.05	19	16	0.0252907	632.644
Control	sample02	0.05	20	12	0.0229164	523.642
Control	sample02	0.05	21	72	0.0196934	3656.05
Control	sample02	0.05	22	31	0.0259025	1196.8
Control	sample02	0.05	23	11	0.0310402	354.379
Control	sample02	0.05	24	4	0.0189493	211.089
Control	sample02	0.05	25	207	0.0214258	9661.25
Control	sample02	0.05	26	116	0.0189704	6114.78
Control	sample02	0.05	27	6	0.0187832	319.435
Control	sample02	0.05	28	24	0.0147382	1628.42
Control	sample02	0.05	29	103	0.0114618	8986.35
Control	sample02	0.05	30	354	0.0137114	25817.9
Control	sample02	0.05	31	53	0.0134072	3953.09
Control	sample02	0.05	32	12	0.00984301	1219.14
Control	sample02	0.05	33	92	0.011441	8041.24
Control	sample02	0.05	34	68	0.00840538	8090.06
Control	sample02	0.05	35	2	0.0108388	184.523
Control	sample02	0.05	36	9	0.00620064	1451.46
Control	sample02	0.05	37	62	0.00590778	10494.6
Control	sample02	0.05	38	21	0.00434861	4829.13
Control	sample02	0.05	39	2	0.00601997	332.228
Control	sample02	0.05	40	87	0.00664	13102.4
Control	sample02	0.05	41	26	0.00560243	4640.84
Control	sample02	0.05	42	6	0.00436122	1375.76
Control	sample02	0.05	43	1	0.0052304	191.19
Control	sample02	0.05	44	21	0.00365901	5739.26
Control	sample02	0.05	45	33	0.0040608	8126.48
Control	sample02	0.05	46	0	0.0030592	0
Control	sample02	0.05	47	0	0.00444019	0
Control	sample05	0.05	1	184690	39.6048	4663.32
Control	sample05	0.05	2	133559	24.5805	5433.52
Control	sample05	0.05	3	3796	0.567274	6691.65
Control	sample05	0.05	4	3979	0.685536	5804.21
Control	sample05	0.05	5	1678	0.300058	5592.25
Control	sample05	0.05	6	1486	0.250924	5922.1
Control	sample05	0.05	7	1860	0.612042	3039.01
Control	sample05	0.05	8	168	0.104603	1606.07
Control	sample05	0.05	9	1422	0.175013	8125.09
Control	sample05	0.05	10	240	0.0883624	2716.09
Control	sample05	0.05	11	731	0.0736404	9926.62
Control	sample05	0.05	12	881	0.0435101	20248.2
Control	sample05	0.05	13	138	0.0379023	3640.94
Control	sample05	0.05	14	79	0.0350708	2252.59
Control	sample05	0.05	15	127	0.0208722	6084.65
Control	sample05	0.05	16	0	0.0424284	0
Control	sample05	0.05	17	274	0.0262605	10433.9
Control	sample05	0.05	18	207	0.0140718	14710.3
Control	sample05	0.05	19	39	0.0285101	1367.93
Control	sample05	0.05	20	60	0.029241	2051.91
Control	sample05	0.05	21	32	0.0132027	2423.75
Control	sample05	0.05	22	54	0.0344374	1568.06
Control	sample05	0.05	23	33	0.0461649	714.828
Control	sample05	0.05	24	25	0.0202125	1236.86
Control	sample05	0.05	25	218	0.0203098	10733.7
Control	sample05	0.05	26	84	0.0216358	3882.45
Control	sample05	0.05	27	73	0.0200427	3642.23
Control	sample05	0.05	28	80	0.0138214	5788.11
Control	sample05	0.05	29	244	0.0160395	15212.5
Control	sample05	0.05	30	126	0.0120432	10462.3
Control	sample05	0.05	31	83	0.0117474	7065.4
Control	sample05	0.05	32	10	0.0078896	1267.49
Control	sample05	0.05	33	122	0.0145776	8369
Control	sample05	0.05	34	80	0.0072096	11096.3
Control	sample05	0.05	35	24	0.0105826	2267.88
Control	sample05	0.05	36	7	0.00810918	863.219
Control	sample05	0.05	37	0	0.0104702	0
Control	sample05	0.05	38	10	0.00693939	1441.05
Control	sample05	0.05	39	2	0.00663098	301.615
Control	sample05	0.05	40	96	0.00493939	19435.6
Control	sample05	0.05	41	54	0.00725197	7446.25
Control	sample05	0.05	42	39	0.00478035	8158.4
Control	sample05	0.05	43	3	0.00493261	608.198
Control	sample05	0.05	44	14	0.00578381	2420.55
Control	sample05	0.05	45	19	0.00511981	3711.08
Control	sample05	0.05	46	4	0.0032304	1238.24
Control	sample05	0.05	47	0	0.00257997	0
Control	sample06	0.05	1	197406	39.2064	5035.04
Control	sample06	0.05	2	97820	20.4773	4777
Control	sample06	0.05	3	3002	0.571307	5254.62
Control	sample06	0.05	4	4751	0.78414	6058.87
Control	sample06	0.05	5	2580	0.263857	9778.02
Control	sample06	0.05	6	1323	0.336495	3931.7
Control	sample06	0.05	7	2962	0.721506	4105.3
Control	sample06	0.05	8	170	0.10096	1683.83
Control	sample06	0.05	9	1145	0.157945	7249.34
Control	sample06	0.05	10	306	0.131126	2333.63
Control	sample06	0.05	11	724	0.0528013	13711.8
Control	sample06	0.05	12	1162	0.069477	16725
Control	sample06	0.05	13	62	0.0199642	3105.56
Control	sample06	0.05	14	89	0.0253536	3510.35
Control	sample06	0.05	15	93	0.0265982	3496.48
Control	sample06	0.05	16	90	0.0300106	2998.94
Control	sample06	0.05	17	175	0.0331805	5274.19
Control	sample06	0.05	18	336	0.0200303	16774.6
Control	sample06	0.05	19	15	0.0262712	570.967
Control	sample06	0.05	20	28	0.0196077	1428.01
Control	sample06	0.05	21	40	0.0191686	2086.75
Control	sample06	0.05	22	24	0.0259708	924.114
Control	sample06	0.05	23	55	0.0347053	1584.77
Control	sample06	0.05	24	33	0.0206212	1600.29
Control	sample06	0.05	25	92	0.0218908	4202.68
Control	sample06	0.05	26	55	0.0170178	3231.91
Control	sample06	0.05	27	37	0.01335	2771.55
Control	sample06	0.05	28	61	0.0205165	2973.22
Control	sample06	0.05	29	162	0.0147782	10962.1
Control	sample06	0.05	30	202	0.0146495	13788.9
Control	sample06	0.05	31	37	0.0135411	2732.43
Control	sample06	0.05	32	9	0.0133027	676.557
Control	sample06	0.05	33	84	0.00852205	9856.79
Control	sample06	0.05	34	39	0.00837965	4654.13
Control	sample06	0.05	35	20	0.00796858	2509.86
Control	sample06	0.05	36	6	0.005352	1121.08
Control	sample06	0.05	37	31	0.00655098	4732.12
Control	sample06	0.05	38	4	0.00569082	702.887
Control	sample06	0.05	39	7	0.00523878	1336.19
Control	sample06	0.05	40	85	0.00657338	12931
Control	sample06	0.05	41	30	0.00682042	4398.56
Control	sample06	0.05	42	56	0.00568141	9856.71
Control	sample06	0.05	43	2	0.00376794	530.795
Control	sample06	0.05	44	39	0.00581485	6706.97
Control	sample06	0.05	45	23	0.00320896	7167.43
Control	sample06	0.05	46	6	0.00252	2380.95
Control	sample06	0.05	47	3	0.00382957	783.378
Control	sample08	0.05	1	160574	40.0015	4014.2
Control	sample08	0.05	2	91035	21.1275	4308.84
Control	sample08	0.05	3	2074	0.522737	3967.58
Control	sample08	0.05	4	3636	0.759664	4786.33
Control	sample08	0.05	5	505	0.264392	1910.04
Control	sample08	0.05	6	691	0.324492	2129.48
Control	sample08	0.05	7	1344	0.612198	2195.37
Control	sample08	0.05	8	130	0.107508	1209.21
Control	sample08	0.05	9	826	0.145855	5663.15
Control	sample08	0.05	10	109	0.0500654	2177.15
Control	sample08	0.05	11	589	0.0678833	8676.65
Control	sample08	0.05	12	398	0.0495011	8040.22
Control	sample08	0.05	13	97	0.036594	2650.7
Control	sample08	0.05	14	66	0.0335348	1968.1
Control	sample08	0.05	15	84	0.0261247	3215.35
Control	sample08	0.05	16	0	0.0234406	0
Control	sample08	0.05	17	266	0.0329948	8061.87
Control	sample08	0.05	18	121	0.0226588	5340.08
Control	sample08	0.05	19	11	0.0269807	407.699
Control	sample08	0.05	20	15	0.0238415	629.156
Control	sample08	0.05	21	27	0.0181101	1490.88
Control	sample08	0.05	22	16	0.0256545	623.673
Control	sample08	0.05	23	9	0.0356618	252.371
Control	sample08	0.05	24	57	0.0216554	2632.14
Control	sample08	0.05	25	240	0.0237152	10120.1
Control	sample08	0.05	26	82	0.0229406	3574.45
Control	sample08	0.05	27	35	0.021132	1656.26
Control	sample08	0.05	28	33	0.0128008	2577.97
Control	sample08	0.05	29	117	0.0159123	7352.82
Control	sample08	0.05	30	177	0.0143822	12306.9
Control	sample08	0.05	31	4	0.0119222	335.509
Control	sample08	0.05	32	10	0.00856762	1167.19
Control	sample08	0.05	33	54	0.00991859	5444.32
Control	sample08	0.05	34	17	0.00765075	2222
Control	sample08	0.05	35	49	0.00932058	5257.19
Control	sample08	0.05	36	52	0.00618899	8402.01
Control	sample08	0.05	37	0	0.00495936	0
Control	sample08	0.05	38	28	0.00571142	4902.46
Control	sample08	0.05	39	2	0.0057488	347.899
Control	sample08	0.05	40	34	0.00518061	6562.94
Control	sample08	0.05	41	63	0.00606918	10380.3
Control	sample08	0.05	42	10	0.00552838	1808.85
Control	sample08	0.05	43	12	0.00601178	1996.08
Control	sample08	0.05	44	7	0.00462899	1512.21
Control	sample08	0.05	45	11	0.00417222	2636.48
Control	sample08	0.05	46	9	0.00529222	1700.61
Control	sample08	0.05	47	117308	26.3599	4450.25
Control	sample09	0.05	1	193926	39.1654	4951.46
Control	sample09	0.05	2	82290	21.5638	3816.12
Control	sample09	0.05	3	2811	0.551961	5092.75
Control	sample09	0.05	4	4183	0.742863	5630.92
Control	sample09	0.05	5	705	0.260988	2701.27
Control	sample09	0.05	6	1356	0.385084	3521.31
Control	sample09	0.05	7	1667	0.81374	2048.57
Control	sample09	0.05	8	78	0.109712	710.954
Control	sample09	0.05	9	654	0.152232	4296.07
Control	sample09	0.05	10	198	0.109004	1816.45
Control	sample09	0.05	11	470	0.0577132	8143.72
Control	sample09	0.05	12	762	0.0490175	15545.5
Control	sample09	0.05	13	117	0.0280238	4175.02
Control	sample09	0.05	14	134	0.0306993	4364.93
Control	sample09	0.05	15	143	0.0313969	4554.59
Control	sample09	0.05	16	1	0.035943	27.8218
Control	sample09	0.05	17	307	0.0268548	11431.9
Control	sample09	0.05	18	170	0.025531	6658.57
Control	sample09	0.05	19	39	0.0264981	1471.8
Control	sample09	0.05	20	20	0.0260435	767.945
Control	sample09	0.05	21	66	0.019283	3422.7
Control	sample09	0.05	22	81	0.0241025	3360.64
Control	sample09	0.05	23	44	0.0449567	978.72
Control	sample09	0.05	24	26	0.0217627	1194.71
Control	sample09	0.05	25	115	0.0209729	5483.28
Control	sample09	0.05	26	60	0.0166008	3614.29
Control	sample09	0.05	27	7	0.0180595	387.609
Control	sample09	0.05	28	74	0.0339554	2179.33
Control	sample09	0.05	29	106	0.0146606	7230.26
Control	sample09	0.05	30	249	0.0148524	16764.9
Control	sample09	0.05	31	45	0.015019	2996.2
Control	sample09	0.05	32	2	0.0104909	190.641
Control	sample09	0.05	33	167	0.0103986	16059.9
Control	sample09	0.05	34	77	0.0101373	7595.68
Control	sample09	0.05	35	3	0.00835117	359.231
Control	sample09	0.05	36	13	0.00595021	2184.8
Control	sample09	0.05	37	6	0.00592019	1013.48
Control	sample09	0.05	38	11	0.00556	1978.42
Control	sample09	0.05	39	16	0.00692096	2311.82
Control	sample09	0.05	40	56	0.00746106	7505.64
Control	sample09	0.05	41	34	0.0086809	3916.65
Control	sample09	0.05	42	26	0.00740858	3509.45
Control	sample09	0.05	43	33	0.00564819	5842.58
Control	sample09	0.05	44	115	0.00487923	23569.3
Control	sample09	0.05	45	21	0.00430042	4883.25
Control	sample09	0.05	46	27	0.00405178	6663.74
Control	sample09	0.05	47	3	0.00403917	742.727
Control	sample10	0.05	1	223266	40.4574	5518.54
Control	sample10	0.05	2	123954	21.3162	5815
Control	sample10	0.05	3	3029	0.516062	5869.45
Control	sample10	0.05	4	6145	0.698313	8799.77
Control	sample10	0.05	5	1596	0.276391	5774.44
Control	sample10	0.05	6	1611	0.299889	5371.99
Control	sample10	0.05	7	3551	0.819527	4332.99
Control	sample10	0.05	8	90	0.0957896	939.56
Control	sample10	0.05	9	1466	0.140429	10439.4
Control	sample10	0.05	10	184	0.127004	1448.78
Control	sample10	0.05	11	736	0.0511532	14388.1
Control	sample10	0.05	12	728	0.0381164	19099.4
Control	sample10	0.05	13	23	0.0324959	707.781
Control	sample10	0.05	14	116	0.0304447	3810.19
Control	sample10	0.05	15	101	0.0253662	3981.68
Control	sample10	0.05	16	50	0.030778	1624.54
Control	sample10	0.05	17	474	0.0224138	21147.7
Control	sample10	0.05	18	338	0.0226272	14937.8
Control	sample10	0.05	19	35	0.0293204	1193.71
Control	sample10	0.05	20	29	0.021261	1364
Control	sample10	0.05	21	39	0.0205401	1898.73
Control	sample10	0.05	22	68	0.0241156	2819.75
Control	sample10	0.05	23	59	0.0486321	1213.19
Control	sample10	0.05	24	55	0.0206234	2666.87
Control	sample10	0.05	25	162	0.0205148	7896.73
Control	sample10	0.05	26	15	0.0157704	951.151
Control	sample10	0.05	27	72	0.0235005	3063.76
Control	sample10	0.05	28	23	0.0132636	1734.07
Control	sample10	0.05	29	85	0.0137142	6197.94
Control	sample10	0.05	30	206	0.0121219	16994
Control	sample10	0.05	31	55	0.0131832	4171.99
Control	sample10	0.05	32	5	0.0101498	492.622
Control	sample10	0.05	33	243	0.0146925	16539
Control	sample10	0.05	34	26	0.00802362	3240.43
Control	sample10	0.05	35	16	0.0088688	1804.08
Control	sample10	0.05	36	24	0.00529037	4536.55
Control	sample10	0.05	37	77	0.00562803	13681.5
Control	sample10	0.05	38	11	0.0045616	2411.43
Control	sample10	0.05	39	5	0.00578042	864.99
Control	sample10	0.05	40	75	0.00502835	14915.4
Control	sample10	0.05	41	91	0.00489862	18576.6
Control	sample10	0.05	42	65	0.00616902	10536.5
Control	sample10	0.05	43	46	0.00566899	8114.32
Control	sample10	0.05	44	5	0.0030016	1665.78
Control	sample10	0.05	45	12	0.00390202	3075.33
Control	sample10	0.05	46	25	0.00371981	6720.78
Control	sample10	0.05	47	1	0.00278042	359.658
Isoflurane	sample11	0.05	1	234967	34.9911	6715.05
Isoflurane	sample11	0.05	2	130382	19.3412	6741.15
Isoflurane	sample11	0.05	3	4488	0.510852	8785.32
Isoflurane	sample11	0.05	4	5963	0.708706	8413.92
Isoflurane	sample11	0.05	5	702	0.192596	3644.93
Isoflurane	sample11	0.05	6	1425	0.264343	5390.73
Isoflurane	sample11	0.05	7	3093	0.64516	4794.16
Isoflurane	sample11	0.05	8	215	0.0918572	2340.59
Isoflurane	sample11	0.05	9	1229	0.128135	9591.43
Isoflurane	sample11	0.05	10	117	0.104076	1124.18
Isoflurane	sample11	0.05	11	950	0.0576623	16475.2
Isoflurane	sample11	0.05	12	1184	0.0406804	29104.9
Isoflurane	sample11	0.05	13	46	0.0286611	1604.97
Isoflurane	sample11	0.05	14	40	0.0282255	1417.16
Isoflurane	sample11	0.05	15	44	0.0228988	1921.5
Isoflurane	sample11	0.05	16	30	0.0278227	1078.26
Isoflurane	sample11	0.05	17	270	0.02331	11583
Isoflurane	sample11	0.05	18	364	0.0134272	27109.2
Isoflurane	sample11	0.05	19	9	0.0227949	394.824
Isoflurane	sample11	0.05	20	91	0.0185548	4904.39
Isoflurane	sample11	0.05	21	22	0.0188202	1168.96
Isoflurane	sample11	0.05	22	44	0.025457	1728.4
Isoflurane	sample11	0.05	23	20	0.0329308	607.334
Isoflurane	sample11	0.05	24	46	0.0207218	2219.89
Isoflurane	sample11	0.05	25	79	0.0196844	4013.33
Isoflurane	sample11	0.05	26	109	0.0168426	6471.68
Isoflurane	sample11	0.05	27	55	0.0208932	2632.44
Isoflurane	sample11	0.05	28	24	0.0125772	1908.21
Isoflurane	sample11	0.05	29	151	0.0129787	11634.5
Isoflurane	sample11	0.05	30	170	0.0107117	15870.5
Isoflurane	sample11	0.05	31	18	0.0114135	1577.08
Isoflurane	sample11	0.05	32	1	0.00999123	100.088
Isoflurane	sample11	0.05	33	300	0.0097104	30894.7
Isoflurane	sample11	0.05	34	7	0.00680218	1029.08
Isoflurane	sample11	0.05	35	16	0.00845203	1893.04
Isoflurane	sample11	0.05	36	43	0.00608762	7063.52
Isoflurane	sample11	0.05	37	10	0.00405894	2463.69
Isoflurane	sample11	0.05	38	14	0.00489037	2862.77
Isoflurane	sample11	0.05	39	11	0.00542118	2029.08
Isoflurane	sample11	0.05	40	29	0.0050208	5775.97
Isoflurane	sample11	0.05	41	33	0.005408	6102.07
Isoflurane	sample11	0.05	42	40	0.00440019	9090.51
Isoflurane	sample11	0.05	43	92	0.00448922	20493.6
Isoflurane	sample11	0.05	44	26	0.00538944	4824.25
Isoflurane	sample11	0.05	45	14	0.00436282	3208.94
Isoflurane	sample11	0.05	46	0	0.00256998	0
Isoflurane	sample11	0.05	47	0	0.00303002	0
Isoflurane	sample12	0.05	1	247968	35.3929	7006.14
Isoflurane	sample12	0.05	2	115747	21.8268	5302.97
Isoflurane	sample12	0.05	3	5030	0.53579	9388
Isoflurane	sample12	0.05	4	8513	0.642024	13259.6
Isoflurane	sample12	0.05	5	425	0.218755	1942.82
Isoflurane	sample12	0.05	6	2719	0.289271	9399.49
Isoflurane	sample12	0.05	7	2957	0.614951	4808.51
Isoflurane	sample12	0.05	8	135	0.0915286	1474.95
Isoflurane	sample12	0.05	9	1369	0.129617	10561.9
Isoflurane	sample12	0.05	10	152	0.116064	1309.62
Isoflurane	sample12	0.05	11	862	0.072632	11868
Isoflurane	sample12	0.05	12	952	0.0370076	25724.4
Isoflurane	sample12	0.05	13	45	0.0268444	1676.33
Isoflurane	sample12	0.05	14	52	0.0263754	1971.53
Isoflurane	sample12	0.05	15	111	0.0265538	4180.19
Isoflurane	sample12	0.05	16	19	0.0227709	834.399
Isoflurane	sample12	0.05	17	389	0.0238226	16329
Isoflurane	sample12	0.05	18	370	0.0156916	23579.4
Isoflurane	sample12	0.05	19	35	0.0241402	1449.87
Isoflurane	sample12	0.05	20	60	0.0190494	3149.7
Isoflurane	sample12	0.05	21	45	0.0213173	2110.96
Isoflurane	sample12	0.05	22	12	0.0255026	470.54
Isoflurane	sample12	0.05	23	18	0.0466724	385.667
Isoflurane	sample12	0.05	24	23	0.0200968	1144.46
Isoflurane	sample12	0.05	25	156	0.0194723	8011.4
Isoflurane	sample12	0.05	26	61	0.0176718	3451.83
Isoflurane	sample12	0.05	27	12	0.0200814	597.568
Isoflurane	sample12	0.05	28	176	0.0166166	10591.8
Isoflurane	sample12	0.05	29	126	0.014279	8824.12
Isoflurane	sample12	0.05	30	164	0.0112307	14602.9
Isoflurane	sample12	0.05	31	44	0.0120638	3647.27
Isoflurane	sample12	0.05	32	2	0.00839264	238.304
Isoflurane	sample12	0.05	33	210	0.00900698	23315.3
Isoflurane	sample12	0.05	34	101	0.00950022	10631.3
Isoflurane	sample12	0.05	35	4	0.0071008	563.317
Isoflurane	sample12	0.05	36	8	0.00708262	1129.52
Isoflurane	sample12	0.05	37	42	0.00645184	6509.77
Isoflurane	sample12	0.05	38	23	0.005912	3890.39
Isoflurane	sample12	0.05	39	16	0.00441939	3620.41
Isoflurane	sample12	0.05	40	42	0.00592045	7094.06
Isoflurane	sample12	0.05	41	156	0.00559162	27898.9
Isoflurane	sample12	0.05	42	60	0.00526304	11400.3
Isoflurane	sample12	0.05	43	18	0.00417056	4315.97
Isoflurane	sample12	0.05	44	20	0.00212058	9431.4
Isoflurane	sample12	0.05	45	9	0.00456998	1969.37
Isoflurane	sample12	0.05	46	16	0.00316979	5047.65
Isoflurane	sample12	0.05	47	4	0.00462342	865.16
Isoflurane	sample13	0.05	1	415643	38.953	10670.4
Isoflurane	sample13	0.05	2	175295	20.115	8714.64
Isoflurane	sample13	0.05	3	5584	0.553575	10087.2
Isoflurane	sample13	0.05	4	6835	0.664114	10291.9
Isoflurane	sample13	0.05	5	2395	0.239043	10019.1
Isoflurane	sample13	0.05	6	2822	0.378653	7452.74
Isoflurane	sample13	0.05	7	9286	0.751035	12364.3
Isoflurane	sample13	0.05	8	103	0.0696609	1478.59
Isoflurane	sample13	0.05	9	1940	0.132902	14597.2
Isoflurane	sample13	0.05	10	195	0.100557	1939.2
Isoflurane	sample13	0.05	11	977	0.0499459	19561.2
Isoflurane	sample13	0.05	12	932	0.0480639	19390.9
Isoflurane	sample13	0.05	13	114	0.0325704	3500.11
Isoflurane	sample13	0.05	14	193	0.0308284	6260.47
Isoflurane	sample13	0.05	15	83	0.0243898	3403.06
Isoflurane	sample13	0.05	16	5	0.0243481	205.355
Isoflurane	sample13	0.05	17	159	0.0230884	6886.56
Isoflurane	sample13	0.05	18	462	0.0187296	24666.8
Isoflurane	sample13	0.05	19	36	0.0248858	1446.61
Isoflurane	sample13	0.05	20	38	0.0225677	1683.82
Isoflurane	sample13	0.05	21	25	0.0194682	1284.14
Isoflurane	sample13	0.05	22	75	0.0303874	2468.13
Isoflurane	sample13	0.05	23	45	0.0391295	1150.03
Isoflurane	sample13	0.05	24	31	0.0208812	1484.59
Isoflurane	sample13	0.05	25	115	0.0208301	5520.86
Isoflurane	sample13	0.05	26	82	0.0189396	4329.56
Isoflurane	sample13	0.05	27	72	0.021007	3427.42
Isoflurane	sample13	0.05	28	60	0.0134131	4473.25
Isoflurane	sample13	0.05	29	61	0.0139613	4369.23
Isoflurane	sample13	0.05	30	190	0.0112332	16914.2
Isoflurane	sample13	0.05	31	83	0.0157843	5258.4
Isoflurane	sample13	0.05	32	63	0.00832877	7564.14
Isoflurane	sample13	0.05	33	438	0.012621	34704.1
Isoflurane	sample13	0.05	34	22	0.00686118	3206.44
Isoflurane	sample13	0.05	35	51	0.010501	4856.68
Isoflurane	sample13	0.05	36	41	0.00699181	5864.01
Isoflurane	sample13	0.05	37	11	0.00394022	2791.72
Isoflurane	sample13	0.05	38	12	0.00647021	1854.65
Isoflurane	sample13	0.05	39	17	0.00666061	2552.32
Isoflurane	sample13	0.05	40	17	0.00464979	3656.08
Isoflurane	sample13	0.05	41	31	0.00692096	4479.15
Isoflurane	sample13	0.05	42	204	0.00718042	28410.6
Isoflurane	sample13	0.05	43	48	0.00278957	17207
Isoflurane	sample13	0.05	44	15	0.0062	2419.35
Isoflurane	sample13	0.05	45	42	0.00420902	9978.56
Isoflurane	sample13	0.05	46	8	0.00377882	2117.07
Isoflurane	sample13	0.05	47	0	0.00174202	0
Isoflurane	sample14	0.05	1	504606	39.0087	12935.7
Isoflurane	sample14	0.05	2	216464	21.1995	10210.8
Isoflurane	sample14	0.05	3	7941	0.608355	13053.2
Isoflurane	sample14	0.05	4	12164	0.787186	15452.5
Isoflurane	sample14	0.05	5	4179	0.25416	16442.4
Isoflurane	sample14	0.05	6	1409	0.314218	4484.15
Isoflurane	sample14	0.05	7	11125	0.760139	14635.5
Isoflurane	sample14	0.05	8	293	0.0995382	2943.59
Isoflurane	sample14	0.05	9	3912	0.142625	27428.5
Isoflurane	sample14	0.05	10	339	0.0890537	3806.69
Isoflurane	sample14	0.05	11	1358	0.0763089	17796.1
Isoflurane	sample14	0.05	12	1570	0.039488	39758.9
Isoflurane	sample14	0.05	13	165	0.035719	4619.39
Isoflurane	sample14	0.05	14	257	0.0272691	9424.6
Isoflurane	sample14	0.05	15	218	0.022622	9636.63
Isoflurane	sample14	0.05	16	4	0.032643	122.538
Isoflurane	sample14	0.05	17	506	0.027043	18710.9
Isoflurane	sample14	0.05	18	796	0.0208998	38086.5
Isoflurane	sample14	0.05	19	49	0.0282052	1737.27
Isoflurane	sample14	0.05	20	52	0.0215134	2417.1
Isoflurane	sample14	0.05	21	89	0.0193334	4603.44
Isoflurane	sample14	0.05	22	77	0.0277635	2773.42
Isoflurane	sample14	0.05	23	54	0.0481697	1121.04
Isoflurane	sample14	0.05	24	40	0.0242935	1646.53
Isoflurane	sample14	0.05	25	136	0.0221194	6148.44
Isoflurane	sample14	0.05	26	80	0.0158674	5041.79
Isoflurane	sample14	0.05	27	39	0.0178849	2180.61
Isoflurane	sample14	0.05	28	249	0.0223864	11122.8
Isoflurane	sample14	0.05	29	63	0.0139369	4520.38
Isoflurane	sample14	0.05	30	366	0.0138409	26443.4
Isoflurane	sample14	0.05	31	88	0.0125136	7032.35
Isoflurane	sample14	0.05	32	5	0.0065008	769.136
Isoflurane	sample14	0.05	33	356	0.0092384	38534.8
Isoflurane	sample14	0.05	34	25	0.00824224	3033.16
Isoflurane	sample14	0.05	35	19	0.0093728	2027.14
Isoflurane	sample14	0.05	36	10	0.00535123	1868.73
Isoflurane	sample14	0.05	37	7	0.00606835	1153.53
Isoflurane	sample14	0.05	38	31	0.00689299	4497.32
Isoflurane	sample14	0.05	39	29	0.00695104	4172.04
Isoflurane	sample14	0.05	40	65	0.00641101	10138.8
Isoflurane	sample14	0.05	41	39	0.00631123	6179.46
Isoflurane	sample14	0.05	42	211	0.00699942	30145.3
Isoflurane	sample14	0.05	43	49	0.00602918	8127.14
Isoflurane	sample14	0.05	44	51	0.00477958	10670.4
Isoflurane	sample14	0.05	45	25	0.00414899	6025.56
Isoflurane	sample14	0.05	46	22	0.0035808	6143.88
Isoflurane	sample14	0.05	47	3	0.00270982	1107.08
Isoflurane	sample16	0.05	1	280868	37.8825	7414.18
Isoflurane	sample16	0.05	2	166566	21.3764	7792.05
Isoflurane	sample16	0.05	3	3622	0.452777	7999.52
Isoflurane	sample16	0.05	4	6502	0.67083	9692.47
Isoflurane	sample16	0.05	5	1766	0.261577	6751.35
Isoflurane	sample16	0.05	6	1124	0.318913	3524.48
Isoflurane	sample16	0.05	7	1376	0.514218	2675.91
Isoflurane	sample16	0.05	8	385	0.123977	3105.41
Isoflurane	sample16	0.05	9	982	0.145385	6754.48
Isoflurane	sample16	0.05	10	49	0.131863	371.599
Isoflurane	sample16	0.05	11	878	0.0551074	15932.5
Isoflurane	sample16	0.05	12	1642	0.052941	31015.7
Isoflurane	sample16	0.05	13	173	0.0229716	7531.04
Isoflurane	sample16	0.05	14	127	0.0261484	4856.89
Isoflurane	sample16	0.05	15	249	0.0275107	9051.04
Isoflurane	sample16	0.05	16	8	0.028999	275.872
Isoflurane	sample16	0.05	17	390	0.0288844	13502.1
Isoflurane	sample16	0.05	18	785	0.0208836	37589.3
Isoflurane	sample16	0.05	19	141	0.0360241	3914.05
Isoflurane	sample16	0.05	20	41	0.0223268	1836.36
Isoflurane	sample16	0.05	21	31	0.0191818	1616.12
Isoflurane	sample16	0.05	22	211	0.0325126	6489.8
Isoflurane	sample16	0.05	23	203	0.0453814	4473.2
Isoflurane	sample16	0.05	24	73	0.0238556	3060.08
Isoflurane	sample16	0.05	25	127	0.0203698	6234.72
Isoflurane	sample16	0.05	26	67	0.0176702	3791.69
Isoflurane	sample16	0.05	27	32	0.0226936	1410.09
Isoflurane	sample16	0.05	28	13	0.01267	1026.04
Isoflurane	sample16	0.05	29	96	0.0123646	7764.1
Isoflurane	sample16	0.05	30	320	0.0150712	21232.6
Isoflurane	sample16	0.05	31	45	0.0116432	3864.92
Isoflurane	sample16	0.05	32	6	0.010671	562.273
Isoflurane	sample16	0.05	33	343	0.0109398	31353.5
Isoflurane	sample16	0.05	34	71	0.0083296	8523.82
Isoflurane	sample16	0.05	35	27	0.0116392	2319.75
Isoflurane	sample16	0.05	36	23	0.00752179	3057.78
Isoflurane	sample16	0.05	37	8	0.00571123	1400.75
Isoflurane	sample16	0.05	38	26	0.00698259	3723.55
Isoflurane	sample16	0.05	39	12	0.00699923	1714.47
Isoflurane	sample16	0.05	40	65	0.0055392	11734.5
Isoflurane	sample16	0.05	41	233	0.00738125	31566.5
Isoflurane	sample16	0.05	42	75	0.00715085	10488.3
Isoflurane	sample16	0.05	43	8	0.00282042	2836.46
Isoflurane	sample16	0.05	44	46	0.00355994	12921.6
Isoflurane	sample16	0.05	45	30	0.00438854	6835.98
Isoflurane	sample16	0.05	46	32	0.00140941	22704.6
Isoflurane	sample16	0.05	47	1	0.00362144	276.133
Isoflurane	sample17	0.05	1	332719	34.6819	9593.46
Isoflurane	sample17	0.05	2	250319	20.0732	12470.3
Isoflurane	sample17	0.05	3	5967	0.495362	12045.7
Isoflurane	sample17	0.05	4	6388	0.725411	8806.04
Isoflurane	sample17	0.05	5	2767	0.226114	12237.2
Isoflurane	sample17	0.05	6	2749	0.2829	9717.21
Isoflurane	sample17	0.05	7	5287	0.549263	9625.63
Isoflurane	sample17	0.05	8	461	0.11715	3935.11
Isoflurane	sample17	0.05	9	1752	0.148752	11778
Isoflurane	sample17	0.05	10	485	0.109605	4424.97
Isoflurane	sample17	0.05	11	1140	0.0451512	25248.5
Isoflurane	sample17	0.05	12	2443	0.0513318	47592.4
Isoflurane	sample17	0.05	13	96	0.0196494	4885.64
Isoflurane	sample17	0.05	14	51	0.019661	2593.97
Isoflurane	sample17	0.05	15	219	0.0234302	9346.91
Isoflurane	sample17	0.05	16	133	0.0290701	4575.14
Isoflurane	sample17	0.05	17	526	0.0256047	20543.1
Isoflurane	sample17	0.05	18	387	0.0182596	21194.3
Isoflurane	sample17	0.05	19	147	0.0418248	3514.66
Isoflurane	sample17	0.05	20	274	0.0227325	12053.2
Isoflurane	sample17	0.05	21	83	0.0173532	4782.98
Isoflurane	sample17	0.05	22	51	0.0252835	2017.13
Isoflurane	sample17	0.05	23	58	0.0417607	1388.87
Isoflurane	sample17	0.05	24	38	0.0243813	1558.57
Isoflurane	sample17	0.05	25	189	0.0213544	8850.65
Isoflurane	sample17	0.05	26	106	0.0152228	6963.22
Isoflurane	sample17	0.05	27	80	0.0217018	3686.33
Isoflurane	sample17	0.05	28	72	0.0177204	4063.1
Isoflurane	sample17	0.05	29	217	0.0128788	16849.4
Isoflurane	sample17	0.05	30	263	0.0115134	22842.9
Isoflurane	sample17	0.05	31	58	0.0111905	5182.95
Isoflurane	sample17	0.05	32	5	0.00794118	629.629
Isoflurane	sample17	0.05	33	513	0.0125528	40867.5
Isoflurane	sample17	0.05	34	51	0.00676301	7541.02
Isoflurane	sample17	0.05	35	38	0.00999546	3801.73
Isoflurane	sample17	0.05	36	12	0.00657837	1824.16
Isoflurane	sample17	0.05	37	40	0.00644858	6202.92
Isoflurane	sample17	0.05	38	17	0.00550259	3089.45
Isoflurane	sample17	0.05	39	15	0.00477958	3138.35
Isoflurane	sample17	0.05	40	56	0.00530042	10565.2
Isoflurane	sample17	0.05	41	77	0.00526221	14632.6
Isoflurane	sample17	0.05	42	27	0.00405683	6655.44
Isoflurane	sample17	0.05	43	12	0.00277958	4317.19
Isoflurane	sample17	0.05	44	19	0.00316058	6011.56
Isoflurane	sample17	0.05	45	33	0.00352083	9372.78
Isoflurane	sample17	0.05	46	18	0.0012704	14168.8
Isoflurane	sample17	0.05	47	8	0.00657894	1216
Isoflurane	sample18	0.05	1	174384	34.4076	5068.19
Isoflurane	sample18	0.05	2	84412	19.4276	4344.95
Isoflurane	sample18	0.05	3	2943	0.444362	6622.97
Isoflurane	sample18	0.05	4	5322	0.660814	8053.71
Isoflurane	sample18	0.05	5	342	0.211117	1619.95
Isoflurane	sample18	0.05	6	2187	0.303987	7194.4
Isoflurane	sample18	0.05	7	2756	0.628969	4381.77
Isoflurane	sample18	0.05	8	16	0.072295	221.315
Isoflurane	sample18	0.05	9	1068	0.123087	8676.81
Isoflurane	sample18	0.05	10	239	0.087046	2745.68
Isoflurane	sample18	0.05	11	600	0.0504331	11897
Isoflurane	sample18	0.05	12	400	0.0348113	11490.5
Isoflurane	sample18	0.05	13	17	0.0357924	474.961
Isoflurane	sample18	0.05	14	56	0.0308202	1816.99
Isoflurane	sample18	0.05	15	113	0.0222702	5074.04
Isoflurane	sample18	0.05	16	0	0.023399	0
Isoflurane	sample18	0.05	17	292	0.0255841	11413.3
Isoflurane	sample18	0.05	18	332	0.0157405	21092
Isoflurane	sample18	0.05	19	19	0.0237078	801.425
Isoflurane	sample18	0.05	20	37	0.0199904	1850.89
Isoflurane	sample18	0.05	21	63	0.0164787	3823.11
Isoflurane	sample18	0.05	22	50	0.0222925	2242.9
Isoflurane	sample18	0.05	23	18	0.048253	373.034
Isoflurane	sample18	0.05	24	17	0.0183032	928.798
Isoflurane	sample18	0.05	25	135	0.0201994	6683.36
Isoflurane	sample18	0.05	26	136	0.0153027	8887.35
Isoflurane	sample18	0.05	27	27	0.0164305	1643.28
Isoflurane	sample18	0.05	28	27	0.0124402	2170.38
Isoflurane	sample18	0.05	29	262	0.01415	18516
Isoflurane	sample18	0.05	30	133	0.0127992	10391.3
Isoflurane	sample18	0.05	31	18	0.0128118	1404.96
Isoflurane	sample18	0.05	32	11	0.00746182	1474.17
Isoflurane	sample18	0.05	33	178	0.00706202	25205.3
Isoflurane	sample18	0.05	34	21	0.00764998	2745.1
Isoflurane	sample18	0.05	35	20	0.00932141	2145.6
Isoflurane	sample18	0.05	36	10	0.00586259	1705.73
Isoflurane	sample18	0.05	37	20	0.00425222	4703.42
Isoflurane	sample18	0.05	38	14	0.00562899	2487.12
Isoflurane	sample18	0.05	39	6	0.00531962	1127.9
Isoflurane	sample18	0.05	40	128	0.00542035	23614.7
Isoflurane	sample18	0.05	41	78	0.00627142	12437.4
Isoflurane	sample18	0.05	42	52	0.00475981	10924.8
Isoflurane	sample18	0.05	43	16	0.0038112	4198.15
Isoflurane	sample18	0.05	44	11	0.00424979	2588.36
Isoflurane	sample18	0.05	45	0	0.00422061	0
Isoflurane	sample18	0.05	46	4	0.00313062	1277.7
Isoflurane	sample18	0.05	47	0	0.0020416	0
Isoflurane	sample19	0.05	1	405981	37.9106	10708.9
Isoflurane	sample19	0.05	2	201720	20.7617	9715.98
Isoflurane	sample19	0.05	3	7033	0.533582	13180.7
Isoflurane	sample19	0.05	4	9514	0.753979	12618.4
Isoflurane	sample19	0.05	5	3888	0.249998	15552.1
Isoflurane	sample19	0.05	6	1349	0.309966	4352.08
Isoflurane	sample19	0.05	7	9208	0.851385	10815.3
Isoflurane	sample19	0.05	8	204	0.111705	1826.25
Isoflurane	sample19	0.05	9	2566	0.157899	16250.9
Isoflurane	sample19	0.05	10	271	0.130853	2071.03
Isoflurane	sample19	0.05	11	1198	0.0578488	20709.1
Isoflurane	sample19	0.05	12	1033	0.0388815	26567.9
Isoflurane	sample19	0.05	13	132	0.0239304	5515.99
Isoflurane	sample19	0.05	14	158	0.0228594	6911.82
Isoflurane	sample19	0.05	15	164	0.0253814	6461.43
Isoflurane	sample19	0.05	16	42	0.0308061	1363.37
Isoflurane	sample19	0.05	17	309	0.026223	11783.6
Isoflurane	sample19	0.05	18	744	0.0212576	34999.2
Isoflurane	sample19	0.05	19	51	0.0269383	1893.21
Isoflurane	sample19	0.05	20	68	0.0219638	3096.01
Isoflurane	sample19	0.05	21	98	0.016161	6064
Isoflurane	sample19	0.05	22	71	0.027247	2605.79
Isoflurane	sample19	0.05	23	168	0.0387451	4336.03
Isoflurane	sample19	0.05	24	25	0.0207992	1201.97
Isoflurane	sample19	0.05	25	153	0.0214349	7137.9
Isoflurane	sample19	0.05	26	86	0.0163106	5272.65
Isoflurane	sample19	0.05	27	39	0.022989	1696.46
Isoflurane	sample19	0.05	28	49	0.0142692	3433.97
Isoflurane	sample19	0.05	29	80	0.0147915	5408.52
[truncated: 1,537 more rows]

## Sheet: Effect sizes by sex
		Effect sizes for Control > Isoflurane (q < 0.05)
		Absolute effect size in males			Absolute effect size in females			Relative sex effect size (negative g indicates larger decrease in females)
	Cluster	Hedges' g*	Upper CI limit	Lower CI limit	Hedges' g	Upper CI limit	Lower CI limit	Hedges' g	Upper CI	Lower CI
	2****	-4.48595	-1.23736	-7.73455	-3.26986	0.0346437	-6.57437	0.675501	1.79051	-0.439509
	11**	-1.79162	0.157266	-3.7405	-1.03815	1.09885	-3.17516	0.811641	1.94147	-0.318186
	15****	-5.411	-1.64141	-9.1806	-1.51381	0.803273	-3.8309	1.5398	2.78792	0.291675
	1***	-2.12559	-0.0469743	-4.20421	-1.84067	0.627811	-4.30915	0.598025	1.70574	-0.509692
	16***	-2.27102	-0.131856	-4.41018	-1.27271	0.946508	-3.49194	0.457983	1.55468	-0.638712
	23***	-2.11994	-0.043632	-4.19626	-1.62325	0.742282	-3.98878	0.0260298	1.10695	-1.05489
	22****	-2.3786	-0.193244	-4.56396	-2.25396	0.431487	-4.93941	0.240677	1.32594	-0.844587
	4***	-3.05614	-0.556852	-5.55543	-1.0809	1.07006	-3.23186	0.752374	1.87544	-0.370694
	6**	-2.23015	-0.108229	-4.35206	-1.51219	0.804194	-3.82858	1.12744	2.30094	-0.0460671
	17***	-3.19842	-0.629009	-5.76782	-1.21072	0.985463	-3.4069	0.814474	1.94464	-0.315688
	19*	-2.411	-0.211505	-4.61049	-0.38417	1.60383	-2.37217	1.04995	2.21159	-0.111681
	13***	-1.56574	0.303826	-3.4353	-4.07149	-0.223304	-7.91967	-0.29866	0.788969	-1.38629
	14**	-1.13802	0.603643	-2.87969	-3.29917	0.0245305	-6.62286	-0.810695	0.31902	-1.94041
	8****	-2.98702	-0.521333	-5.45271	-3.72524	-0.116271	-7.3342	0.293442	1.38084	-0.793954
	3****	-2.56818	-0.298745	-4.83762	-5.11203	-0.516063	-9.70799	-0.0570483	1.02407	-1.13817
	9***	-2.04698	-0.000115972	-4.09384	-3.79446	-0.138149	-7.45076	-0.646816	0.465396	-1.75903
	10**	-0.762612	0.895226	-2.42045	-2.88339	0.174119	-5.9409	-1.49738	-0.257764	-2.73699
	21**	-1.81353	0.143433	-3.77049	-1.3635	0.891074	-3.61807	0.0283052	1.10924	-1.05263
	7**	-3.53134	-0.793336	-6.26935	-0.94178	1.16551	-3.04907	-0.12742	0.954684	-1.20952
	12**	-2.17636	-0.0768681	-4.27586	-1.13462	1.03455	-3.30379	-0.0695041	1.01173	-1.15074
	18*	-0.996166	0.710434	-2.70277	-5.23728	-0.549054	-9.9255	-1.26899	-0.0719728	-2.466
	5****	-2.10482	-0.0346645	-4.17498	-3.92996	-0.180266	-7.67966	-0.487845	0.610964	-1.58665
	24*	-1.03359	0.681877	-2.74905	-1.46985	0.828458	-3.76815	-0.254461	0.83132	-1.34024
		Effect sizes for Control < Isoflurane (q < 0.005)
		Absolute effect size in males			Absolute effect size in females			Relative sex effect size (positive g indicates larger increase in females)
	Cluster	Hedges' g*	Upper CI limit	Lower CI limit	Hedges' g	Upper CI limit	Lower CI limit	Hedges' g	Upper CI	Lower CI
	31*	1.11803	2.85451	-0.618458	0.67346	2.71167	-1.36475	-0.282132	0.804771	-1.36904
	4***	2.28177	4.4255	0.138045	2.09055	4.68718	-0.506086	0.326506	1.41545	-0.762436
	36*	0.326446	1.92604	-1.27315	4.01953	7.83145	0.207612	1.12378	2.29671	-0.0491445
	7***	2.05143	4.10006	0.00278721	2.34112	5.07541	-0.393158	0.27533	1.36195	-0.811287
	12***	1.76684	3.70666	-0.172991	2.40244	5.17164	-0.366766	0.571712	1.67714	-0.53372
	37****	2.72759	5.07013	0.385048	2.39702	5.16312	-0.369078	-0.369191	0.721989	-1.46037
	38*	0.702294	2.34945	-0.944866	1.34057	3.58603	-0.904901	0.215145	1.29953	-0.869238
	30*	0.990066	2.69525	-0.715116	1.47436	3.77458	-0.825852	0.919542	2.06287	-0.223786
	1**	1.68542	3.59609	-0.225254	1.51539	3.83315	-0.802379	0.392365	1.48487	-0.700143
	24*	0.723411	2.37422	-0.927396	1.33765	3.58196	-0.906668	0.789892	1.91718	-0.3374
	32****	3.28551	5.89844	0.672584	1.84938	4.32215	-0.623401	-0.237758	0.8474	-1.32292
	13**	1.77696	3.72047	-0.166558	1.48391	3.78817	-0.82036	0.357088	1.44761	-0.73343
	26***	2.13682	4.22003	0.0536111	3.21379	6.48175	-0.0541642	-0.125774	0.956299	-1.20785
	9***	1.6907	3.60324	-0.221833	3.26343	6.56373	-0.036871	1.18515	2.36796	0.00234327
	14****	2.46226	4.68431	0.240202	2.16981	4.80907	-0.46944	0.298205	1.38581	-0.789403
	8****	7.08469	11.8347	2.33468	6.68022	12.4545	0.905921	0.46401	1.56112	-0.633101
	18***	1.95904	3.97124	-0.0531575	1.60818	3.9669	-0.750541	0.119684	1.20164	-0.962275
	19*	0.959116	2.65722	-0.738986	1.35139	3.60113	-0.898362	0.165215	1.24816	-0.917728
	2****	5.50252	9.32466	1.68038	5.32813	10.0835	0.572741	-0.220743	0.863825	-1.30531
	23**	1.5723	3.44406	-0.299461	1.24307	3.45116	-0.965022	0.0698218	1.15106	-1.01142
	16****	3.71384	6.54665	0.88104	2.21806	4.88368	-0.447565	-0.770084	0.354954	-1.89512
	22***	1.852	3.82329	-0.1193	1.98269	4.52281	-0.557429	0.0175268	1.09842	-1.06337
	25****	2.096	4.16258	0.0294175	8.95961	16.5028	1.41646	1.81667	3.12452	0.508813
	28****	3.5784	6.3407	0.8161	2.08712	4.68193	-0.507691	-1.3404	-0.130663	-2.55013
	5****	4.13154	7.18663	1.07645	6.93342	12.9017	0.965149	0.578542	1.68456	-0.527474
	15****	2.90445	5.33042	0.478479	3.96649	7.74152	0.191465	0.740189	1.86193	-0.381547
	20****	1.73535	3.66379	-0.193093	5.13306	9.7445	0.521632	0.963218	2.11244	-0.186003
	35*	1.18812	2.9431	-0.566856	0.676166	2.71497	-1.36264	-0.595903	0.511626	-1.70343
	3****	2.83564	5.22887	0.442401	3.50726	6.96888	0.0456282	-0.412688	0.68105	-1.50643
	17****	4.16508	7.23831	1.09186	2.50149	5.32806	-0.325072	-0.377121	0.714505	-1.46875
	10****	2.11589	4.19055	0.0412295	2.79143	5.79201	-0.209159	0.944121	2.09073	-0.202493
	6***	2.0812	4.1418	0.0206037	1.90741	4.40914	-0.59433	-0.59175	0.515413	-1.69891
	27**	2.41015	4.60927	0.211027	1.21246	3.40927	-0.984359	-0.365241	0.725721	-1.4562
	11****	2.9428	5.38716	0.498441	2.19541	4.84862	-0.457792	-0.528296	0.573582	-1.63017
	34*	1.09409	2.82448	-0.636295	1.09963	3.25685	-1.0576	-0.685459	0.430549	-1.80147
