# Supplementary material for: Genetic capture for conscious state transitions
Source: Research Square preprint supplement (doi:10.21203/rs.3.rs-6192781/v1), 2025-06-19
Supplement: Supplementary file 19 [file d518bfaa86eddd12460ef9fa.docx]

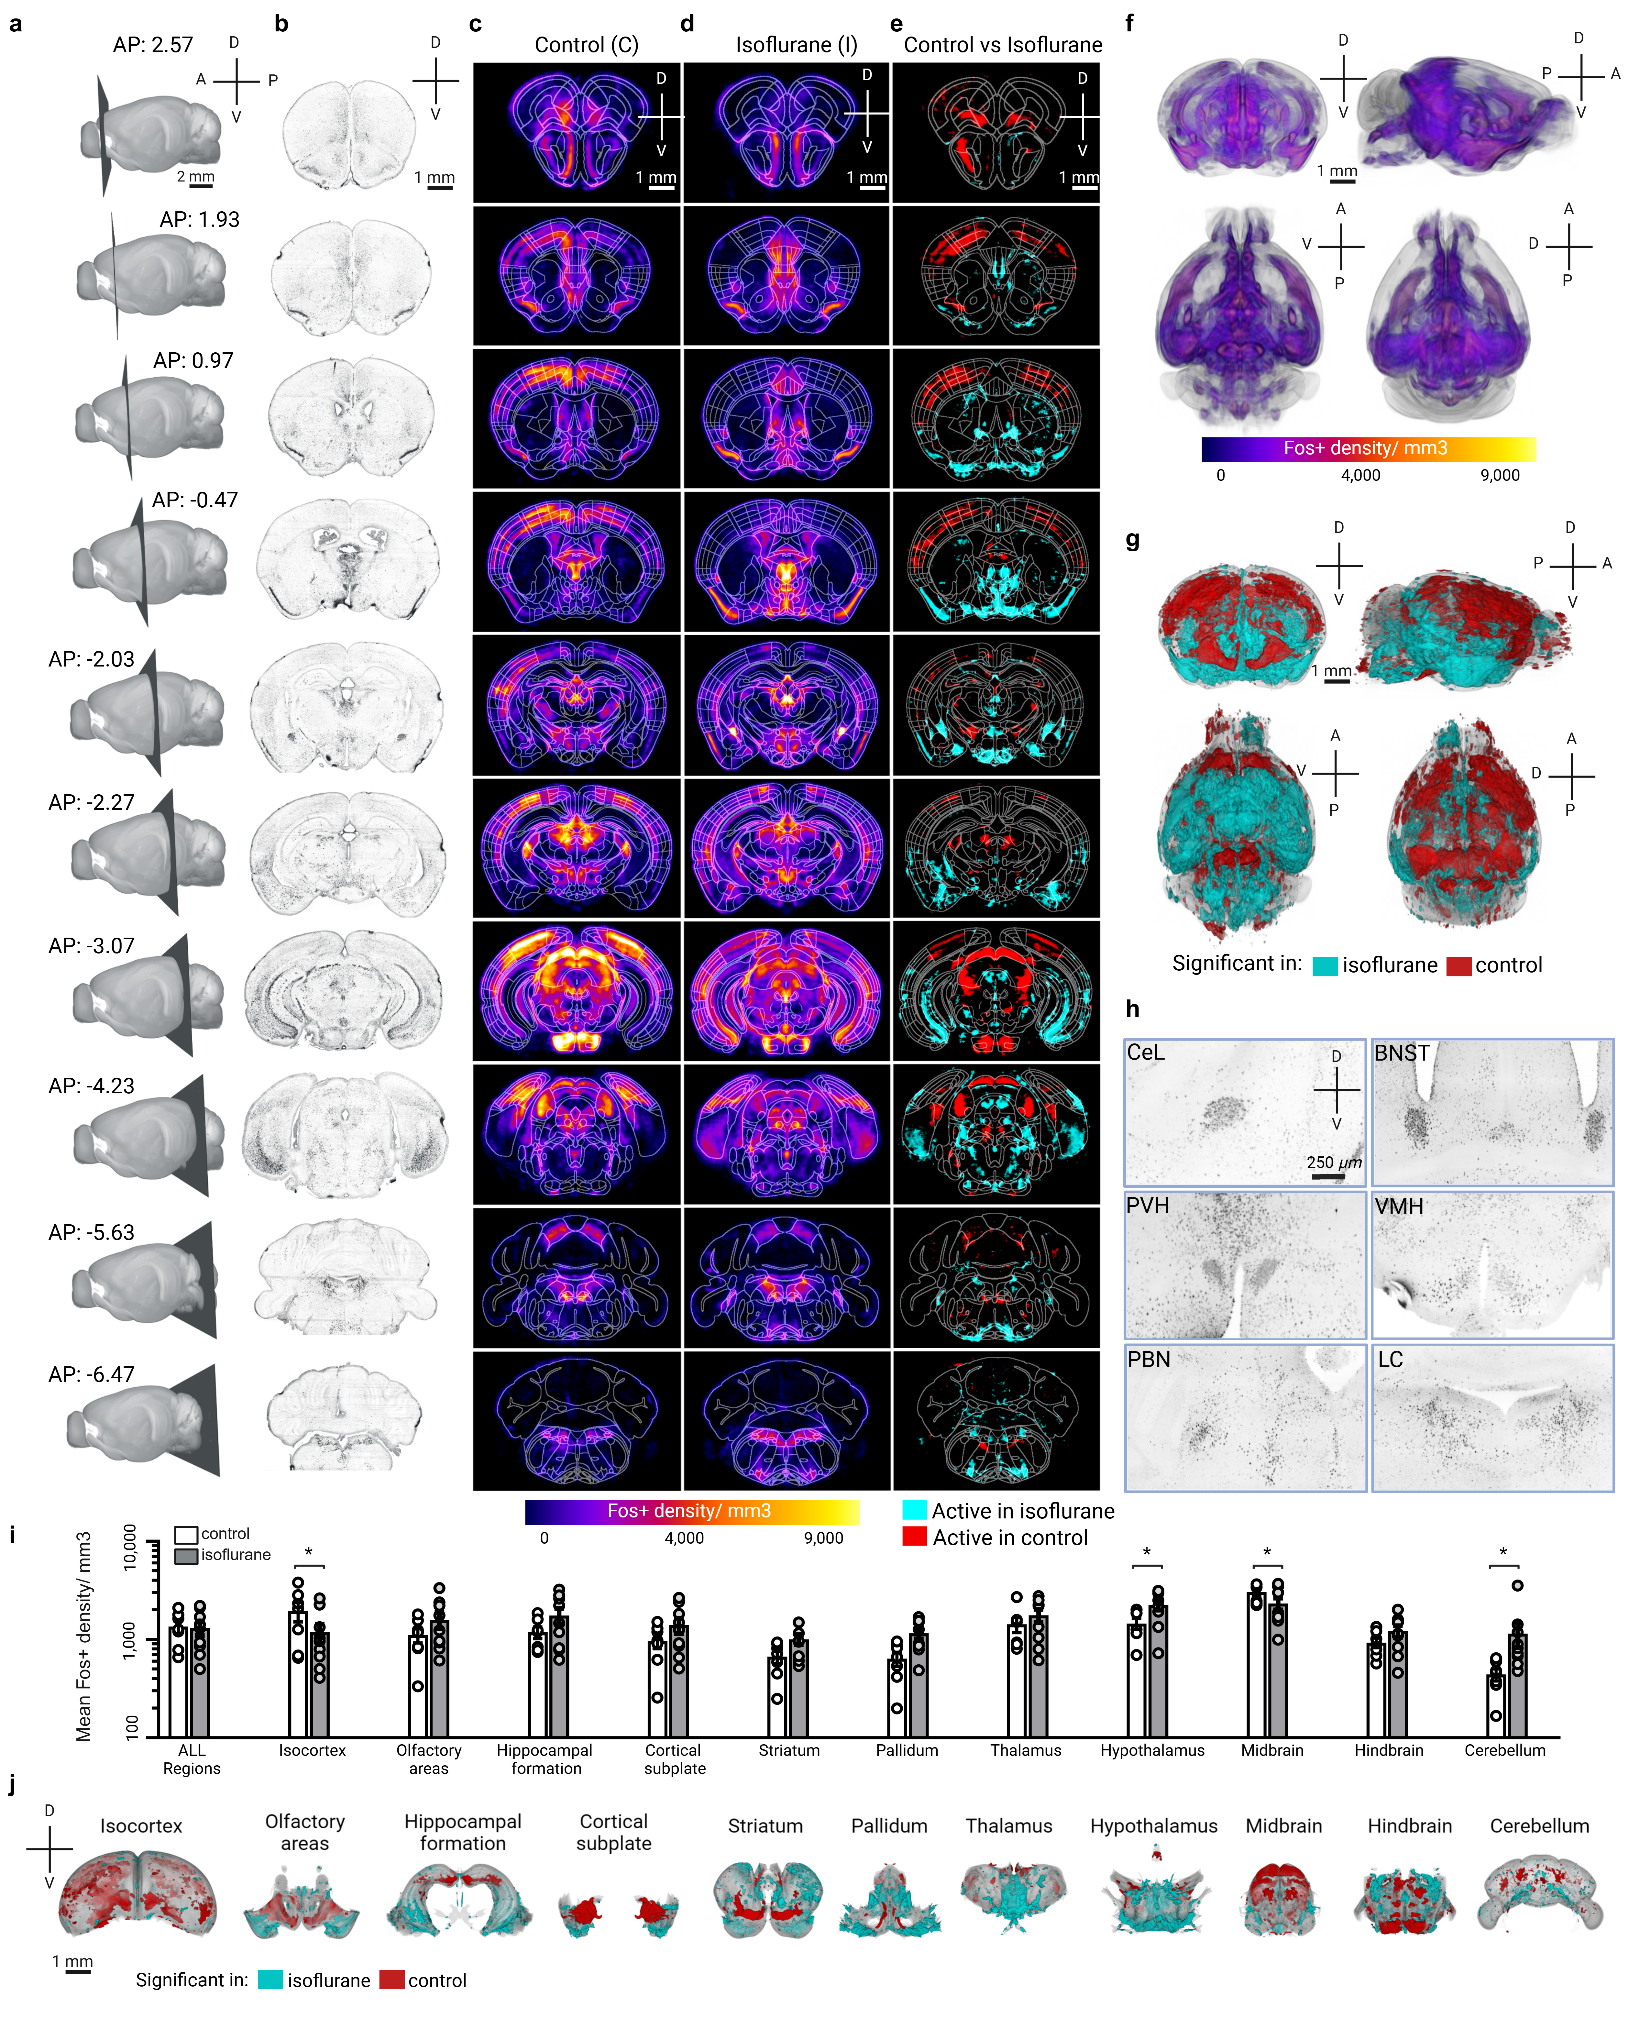


**Extended Figure 4. Fos activity mapping reveals subcortical isoflurane-activated hotspots.** (**a**)Intact whole brains were imaged horizontally with light sheet microscopy to acquire cellular resolution Fos+ signal then digitally resliced in the coronal plane at the indicated AP positions. (**b**) Representative mean intensity projection of the raw 3.6X Fos+ signal from the isoflurane condition virtually re-sliced to the coronal plane at the indicated AP positions. (**c**) Mean Fos+ density in the control condition across all samples (n=7) shown as a heatmap. (**d**) Mean Fos+ density in the isoflurane condition across all samples (n=9) shown as a heatmap in the indicated AP coronal plane. (**e**) Pairwise comparison of significant Fos+ regions in control vs isoflurane condition with blue indicating higher Fos+ activity in the isoflurane condition and red indicating higher Fos+ activity in control condition. (**f**) 3D mean Fos+ density heatmaps from the isoflurane condition shown as sections in panel d. (**g**) Voxel-wise significance map of regions significantly regulated in the isoflurane (blue) or control (red) conditions. (**h**) Representative raw Fos+ immunolabeling at the indicated regions: CeL = centrolateral amygdala; BNST = bed nucleus of stria terminalis; PVH = paraventricular hypothalamus; VMH = ventromedial hypothalamus; PBN = parabrachial nucleus; LC = locus coeruleus. (**i**) Mean Fos density calculated across larger brain subdivisions after atlas registration by ClearMap in control vs isoflurane conditions shows significant differences in isocortex, hypothalamus, midbrain and cerebellum. (unpaired t-test, *p<0.05). (**j**) Regions significantly activated in isoflurane (blue) or control (red). Scale bars shown are 1mm except in panel h insets where scale bar is 250 µm.
