# Supplementary material for: Genetic capture for conscious state transitions
Source: Research Square preprint supplement (doi:10.21203/rs.3.rs-6192781/v1), 2025-06-19
Supplement: Supplementary file 20 [file d91cb13d0b54b4a1d8f3c80e.docx]

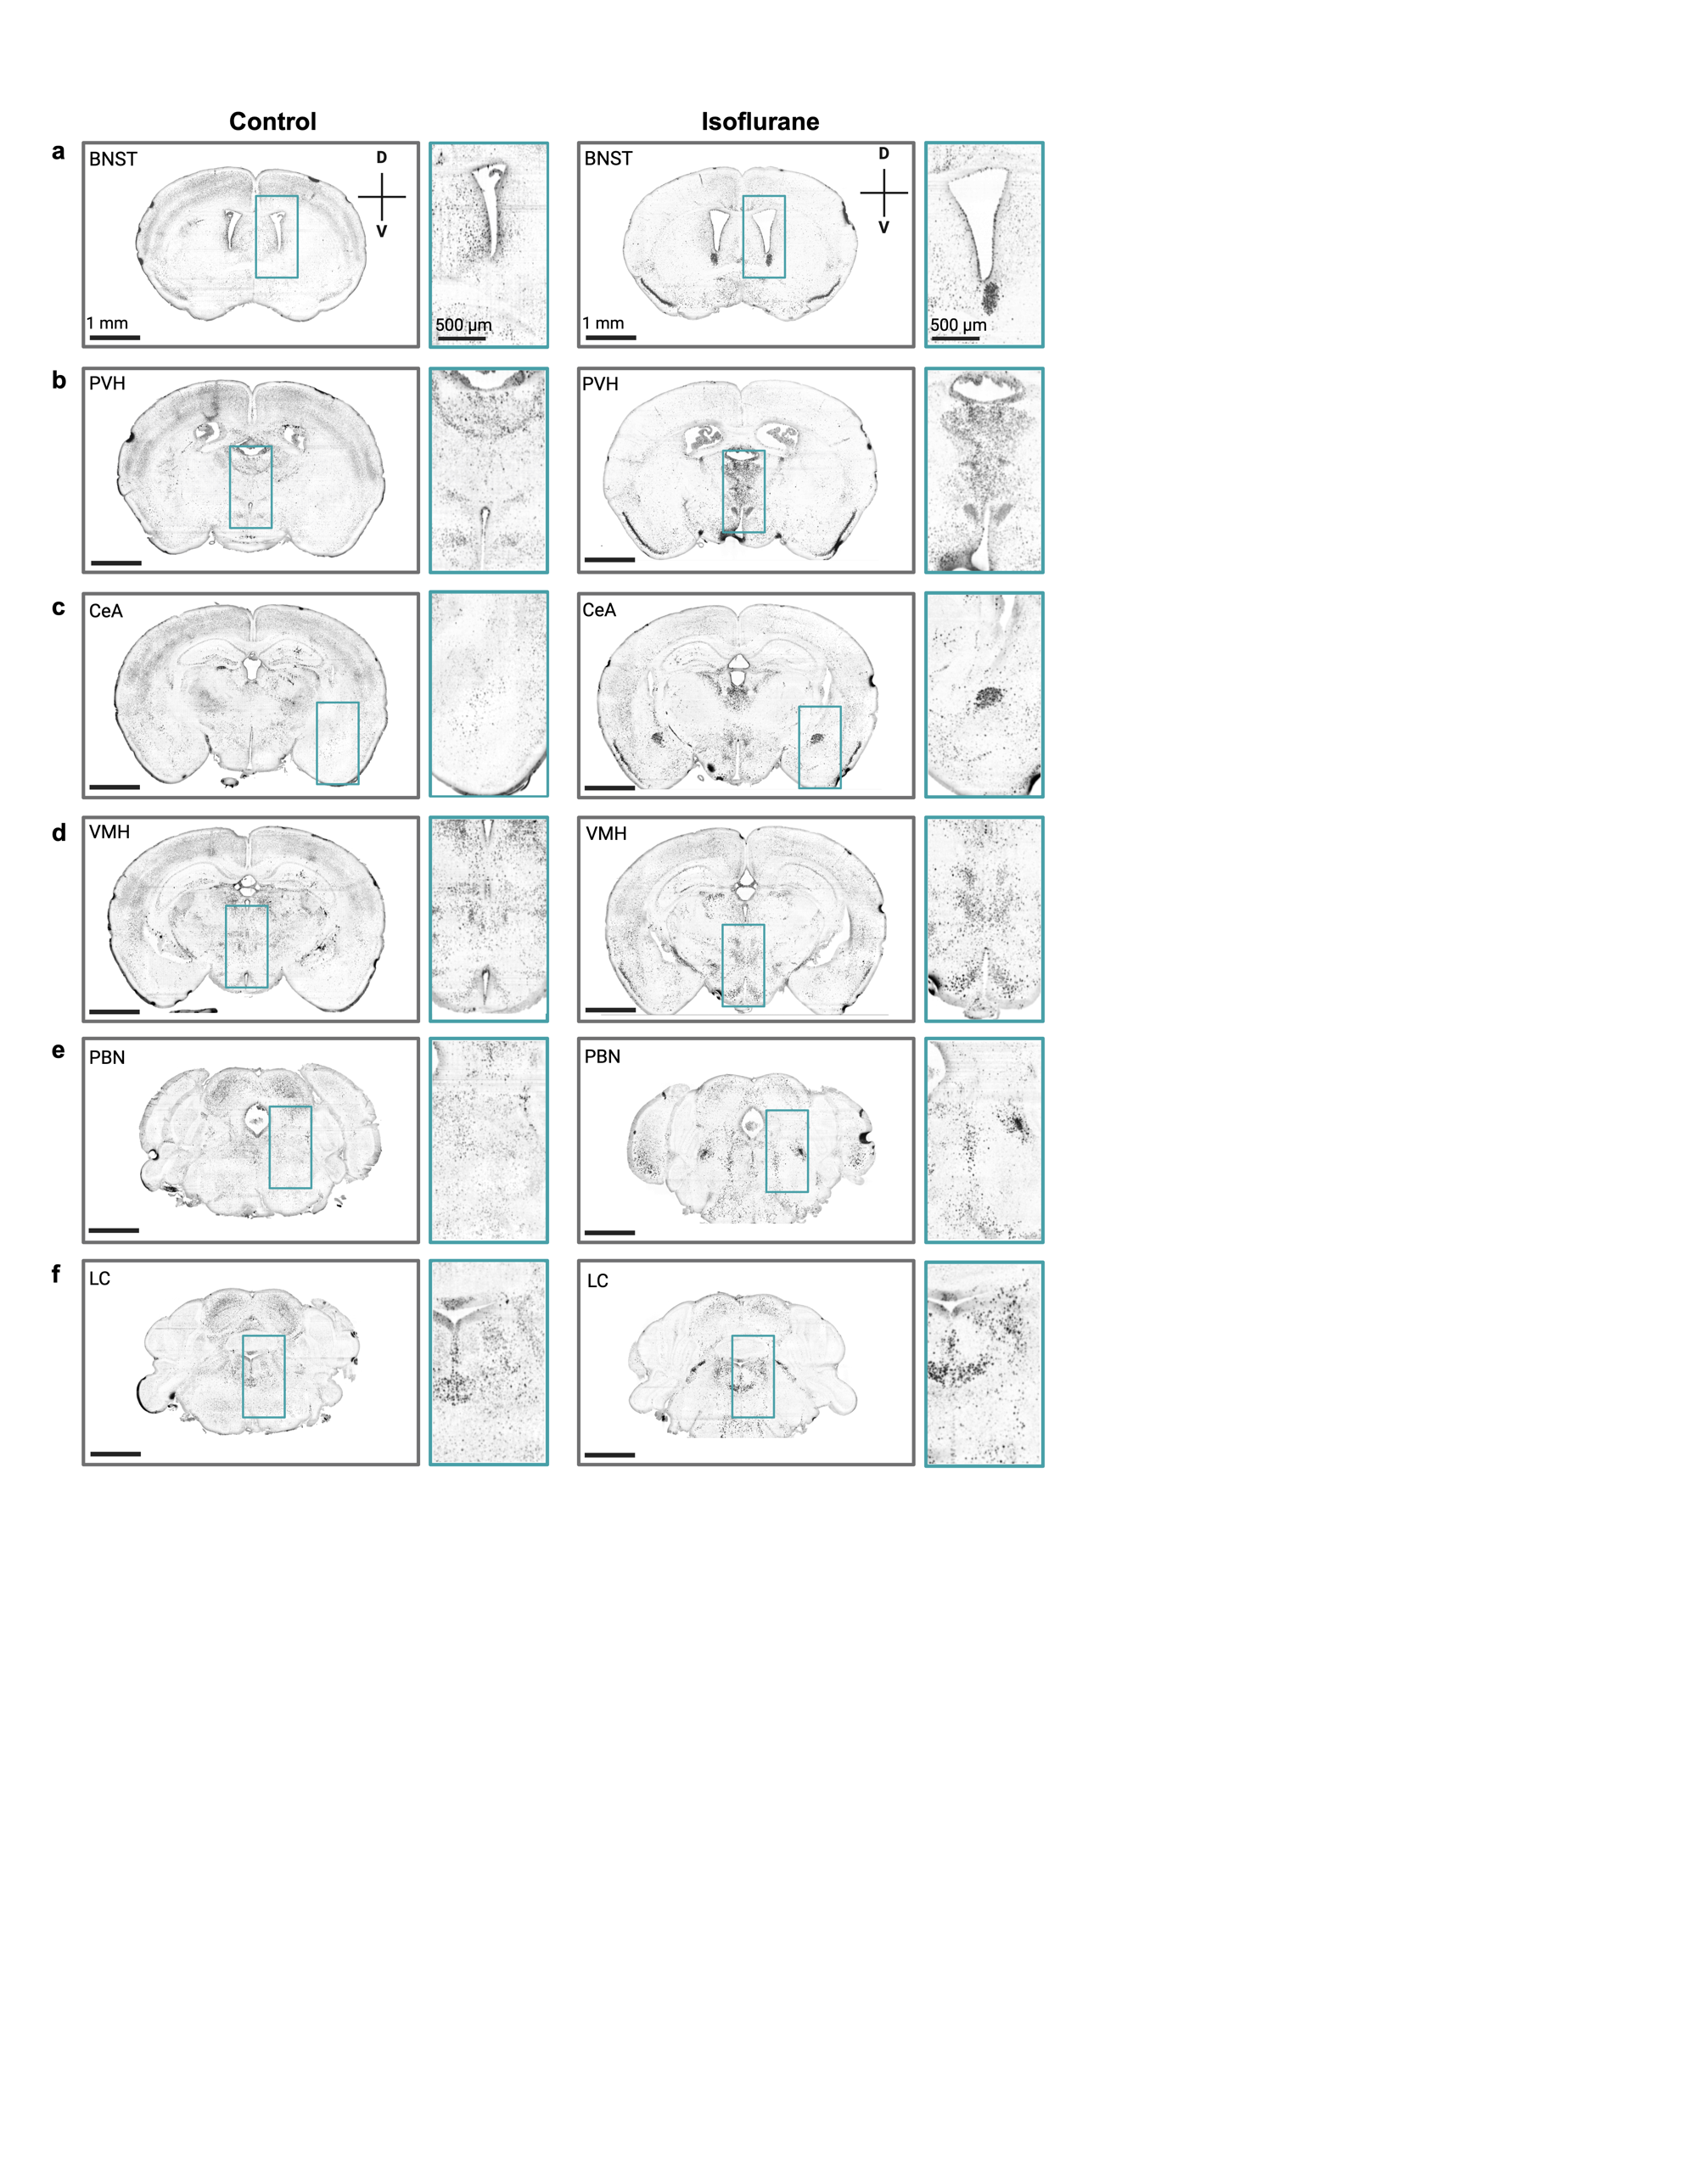


**Extended Figure 6. Representative Fos immunolabeling from cleared intact brains.** Images from a representative control (left column) and an isoflurane mouse (right column) from Figure 2. Images were acquired with a light sheet microscope using a 3.6X objective in the horizontal plane and then re-sliced to the coronal plane to identify (**a**) BNST = bed nucleus of the stria terminalis, (**b**) PVH = paraventricular hypothalamus, (**c**) CeA = central amygdala, (**d**) VMH = ventromedial hypothalamus, (**e**) PBN = parabrachial nucleus, (**f**) LC = locus coeruleus. Scale bars are 1mm for the full coronal slice and 500 μm for the inset image.
